# Supplementary material for: Identification of an early cell fate regulator by detecting dynamics in transcriptional heterogeneity and co-regulation during astrocyte differentiation
Source: PubMed Central journal article supplement (PMC6506553; doi:10.1038/s41540-019-0095-2), 2019-05-08
Supplement: 41540_2019_95_MOESM1_ESM.pdf [file 41540_2019_95_MOESM1_ESM.pdf]

# 1 **Supplementary information**

## 2 **Supplementary Notes**

### 3 **System Transition Score (STS) concept**

4 Basically, this concept is based on the importance of oscillations in gene expression. Two  
5 indexes are obtained to evaluate the functional genes that have an impact on upcoming  
6 cellular event. The first index is the change in the variance of individual gene expression  
7 among individual cells in each of the cell states. This index reflects a measure of the  
8 variability in the expression of certain genes. By their very nature, the expression levels  
9 of certain genes are very likely to be variable between single cells. However, our  
10 hypothesis is that if there is a significant cellular event is going to occur, the variability  
11 in gene expression found between individual cells should change drastically as an  
12 indicator when comparing the before and after cell transition states. The second index is  
13 the change in the gene-gene correlation across individual cells. This index is a measure  
14 of the rearrangement of the co-expressed gene network. For each cell status, the  
15 expression of a certain gene is correlated with the expression of other genes. For example,  
16 since oscillatory genes are known to be co-expressed, their expression is correlated.  
17 However, if there is a significant change in cell status, the status of the gene network is  
18 significantly reorganized, and so therefore there will be a drastic change in the co-

1 expression pattern. Using a calculation of both indexes we tried to assess the direction of  
2 the cell transition between the undifferentiated and differentiated states. If both indexes  
3 are large, the differential score is high. According to our hypothesis, if the differential  
4 score is high, this indicates that there is large rearrangement in gene co-expression and  
5 also large variability change in the expression of some genes. Since we defined the order  
6 of cell types from NSCs, TAP, and astrocytes in order of their differentiation status, the  
7 potential differentiating status (TAPs) or differentiated status (astrocytes) were compared  
8 with the undifferentiated status (NSCs). The differential variability was defined as the  
9 absolute value of the difference between the average SD in the undifferentiated cells and  
10 that in differentiating cells.

11

## 12 **STS calculation**

13 The analysis was conducted using the Bioconductor package in the R language. The  
14 system transition score (STS) was used to rank the genes and identify those with high  
15 differential variability and correlation between two different cellular statuses (NSCs vs.  
16 TAPs, or NSCs vs. astrocytes). In each module, the average PCC of each gene with other  
17 genes was calculated for each module to represent the correlation score of the module.  
18 The differential correlation was defined as the absolute value of the difference between

1 the average PCC in the NSCs and that in the TAPs or astrocytes. Using the single cell  
2 analysis data, the average SD of each gene within a population of cells in each cell type  
3 was calculated. The STS was then described using the following formula:

$$4 \quad STS = \log \left( \frac{\frac{PCC_{in} \times SD}{PCC_{out}} \text{ at } NSC}{\frac{PCC_{in} \times SD}{PCC_{out}} \text{ at } TAP/astrocyte} \right)$$

5 where  $PCC_{in}$  is the average PCC of each gene against genes inside the module in a  
6 particular state,  $PCC_{out}$  is the average PCC of each gene against the genes outside the  
7 module in a particular state. The DVC genes are defined as the genes for which the STS  
8 was  $2 \times SD$  higher than the average STS over all genes.

9

## 10 **Practical example of STS calculation**

11 We show how to calculate STS using an example. There are five genes, gene A, B, C, D  
12 and E (Fig. S1A). Gene A is highly variable among individual cells in an undifferentiated  
13 state. The standard deviation (SD) of gene A is 2.2. Gene A is highly co-expressed with  
14 gene B and C among individual cells in a differentiated state (Fig. S1A). Gene A, B and  
15 C form co-expressed gene module. The average correlation coefficient (CC) between  
16 gene A and gene B/C is 0.95 in the module. The average CC between gene A and gene  
17 D/E is 0.40 outside the module. After differentiation, the expression of gene A  
18 decreases its variability. The SD of gene A becomes 0.25. The average CC between gene

1 A and gene B/C becomes 0.12. The average CC between gene A and gene D/E becomes  
2 0.95. The State transition score (STS) of gene A is 9.2. The same calculation is applied  
3 to gene C. The STS of gene C is -0.37. The STS of gene A is higher than that of gene C  
4 based on large variability and correlation change of gene A expression along with  
5 differentiation state change.

6

### 7 **Definition of differentially expressed genes (DEGs)**

8 We defined DEGs as genes which had two properties; first there were significant  
9 differences in their expression between two cell types using a comparison of the average  
10 gene expression in a population of cells, and second there were no significant difference  
11 of the variability index between two cell types . The threshold was set to limma-voom  
12 test  $q < 0.05$ , and the Levene test  $q \geq 0.05$ .

13

14

### 15 **Figure Legends**

#### 16 **Figure S1. Schematic illustration of detailed example of DVC analysis.**

17 (A) Practical example of STS calculation. There are five genes (gene A, B, C, D, and E).

18 Their expression values in NSCs and astrocytes are shown in the gene expression data

1 matrix. Index 1 is variability, which is calculated as the standard deviation (SD) among 3  
2 samples. Index 2 is the correlation between genes. For example, the Pearson correlation  
3 coefficient (PCC) of Gene A expression pattern (3.8, 6.1, 8.2) and Gene B expression  
4 pattern (1.1, 2.0, 2.8) is 1.0, and the correlation of Gene A expression pattern (3.8, 6.1,  
5 8.2) and Gene C expression pattern (4.2, 4.9, 7.1) is 0.95 in NSC status. In the image,  
6 correlation of 7 pairs of genes are illustrated for example. When a pair of genes show high  
7 correlation, they are “co-expressed genes”. Practically, such gene pair correlation is  
8 calculated through hierarchical clustering, and clustered members are defined as “co-  
9 expression modules”. Using two indexes, STS is calculated for each gene. In the image  
10 STS for Gene A and C are calculated. (B) Comparison of the DVC analysis concept in  
11 this work and the previous work. In the previous work<sup>13</sup>, samples represented the gene  
12 expression data from replicated samples from the bulk cells, but in this study, samples  
13 represent the gene expression of single cells. Using three genes as a model, the concept  
14 of “variability of gene expression” and “correlation of gene expression” is illustrated. For  
15 the variability, the variance among samples of measured gene expressions for each gene  
16 is evaluated. In this study, this variance represents the variance of single cell  
17 measurements (92 single cells in NSCs, 27 single cells in TAPs, and 22 single cells in  
18 astrocytes). For the correlation, the co-expression relationships between multiple genes

1 are evaluated. Simply put, the similarity of expression pattern among multiple genes (3  
2 gene pattern is illustrated in the figure) are evaluated whether co-expressed or not. In the  
3 previous report<sup>13</sup>, the co-expression relationships between genes in “embryonic stem cells  
4 (30,035 probes) and induced pluripotent stem cells (12,364 probes)” were compared. In  
5 this report, the co-expression relationships were calculated from “12,147 genes in each  
6 state (NSC, TAP, or astrocyte)”.

7

8 **Figure S2. Detailed comparison of co-expression networks between TAP/Astrocyte**  
9 **vs. NSC.**

10 Within the same co-expression module (red), four genes were extracted as examples.  
11 Their correlation relationships are similar but different. Dll1, Dll3, and Cdk6 are highly  
12 correlated with each other in NSC, however, their correlations were decreased in TAP  
13 and astrocytes. If all the correlation network is colored in detail, their correlations are  
14 found to have difference. Moreover, the correlation between Dll1 and Csrp2 shows nearly  
15 opposite relation when the relation of TAP and Astrocyte is compared. Therefore, even  
16 the heatmap of differential correlation is shown with similar colorings in Fig. 2A, it is  
17 does not mean that the total correlation network with each member gene is the same.

18

1 **Fig. S3 Representative images of NSCs in response to the Ntsr2 antagonist (JMV449).**

2 First row: Representative phase contrast microscopic images (10×) showing NSC  
3 morphology. Second row (N = 1), third row (N = 2), and fourth row (N = 3). N represents  
4 images of nuclei stained with SYTOX blue obtained from the same experiment carried  
5 out in triplicate. Scale bars = 200 μm. There were no morphological or cell number  
6 changes in response to JMV449 treatment.

7

8 **Table S1** Gene list for each module

9 **Table S2** DVC genes (TAPs vs NSCs)

10 **Table S3** DVC genes (Astrocytes vs NSCs)

11 **Table S4** Top 10% DVC genes (astrocytes vs NSCs) in the second data set

12 **Table S5** Primers used in real-time RT-PCR

13

14

15

A

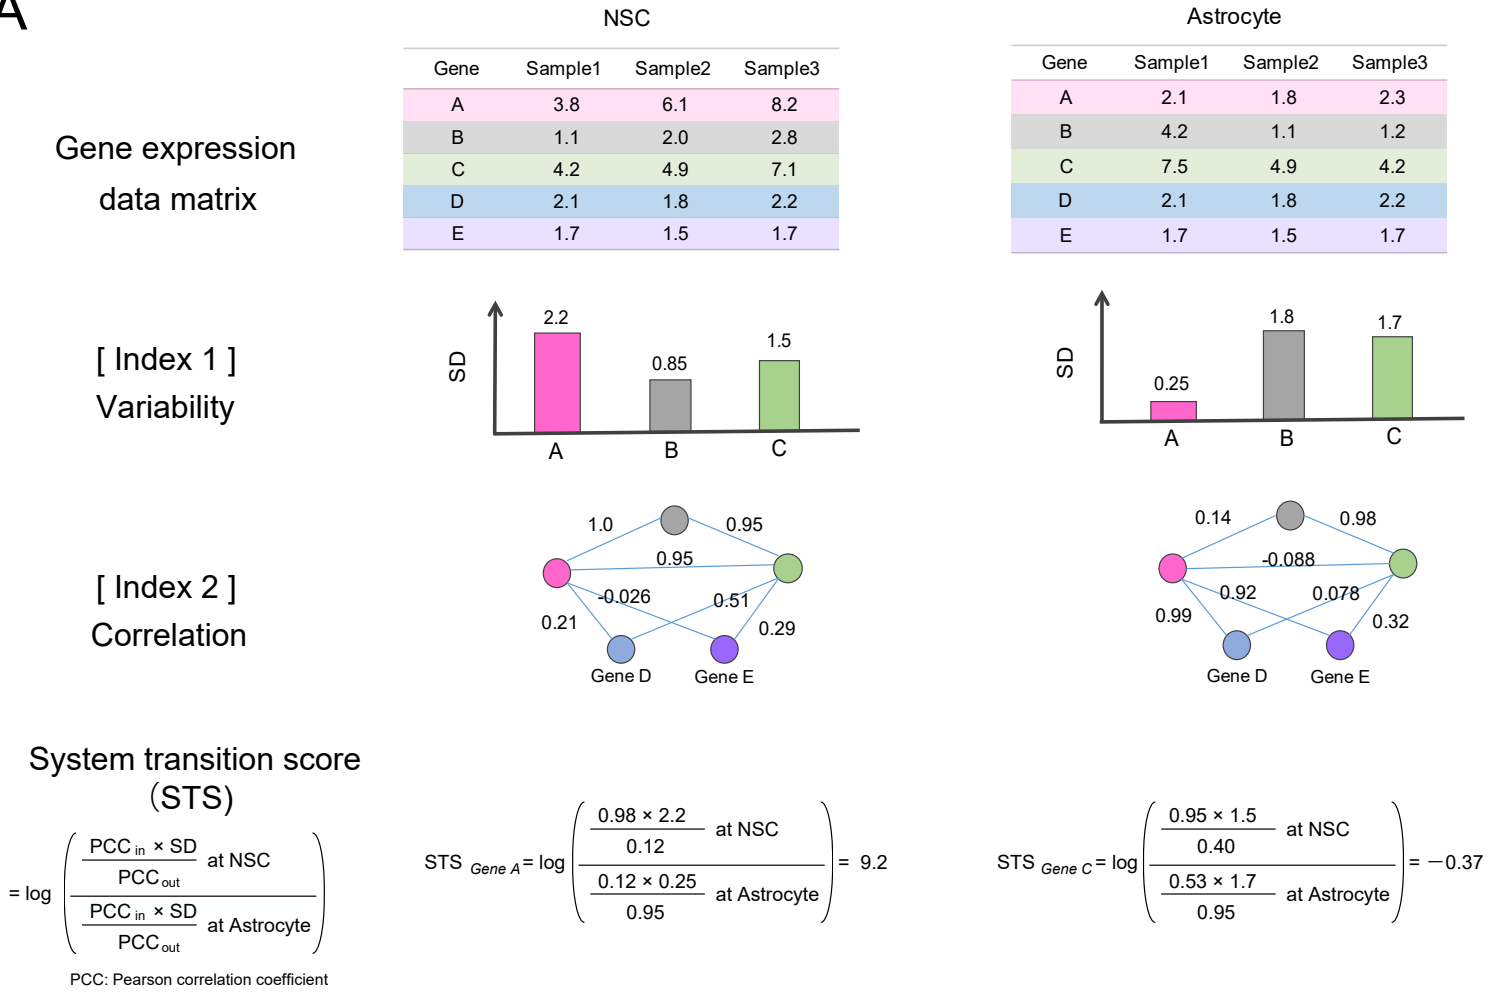

B

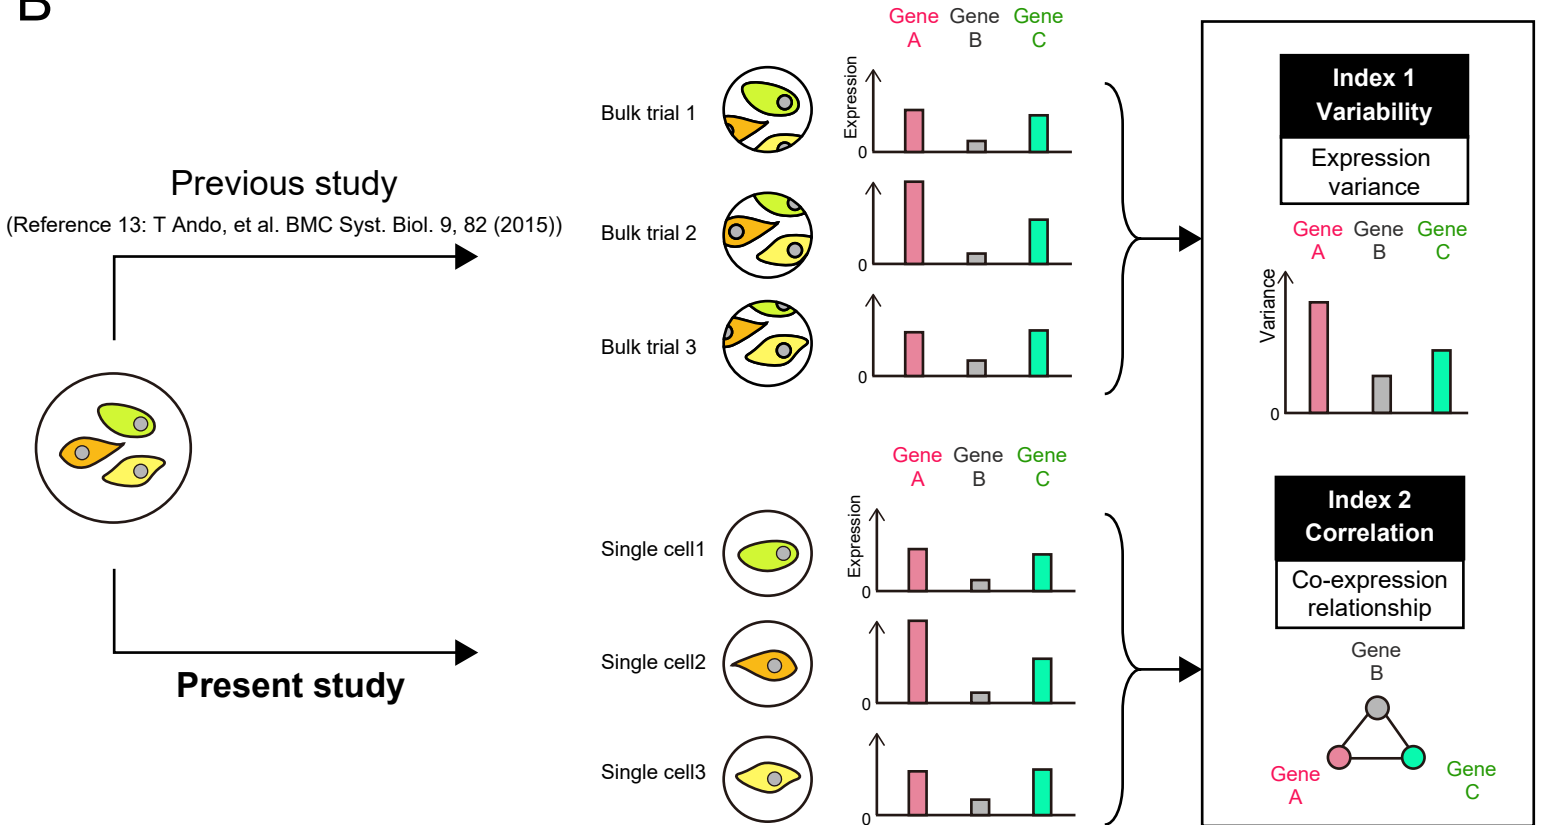

Fig. S1



# Differential correlation (Heatmap)

Coexpression module  
(Red)

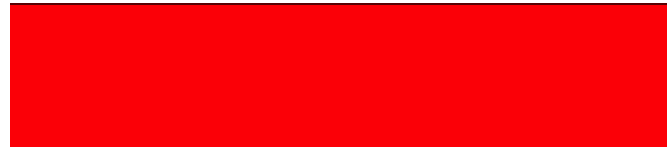

TAP vs. NSC

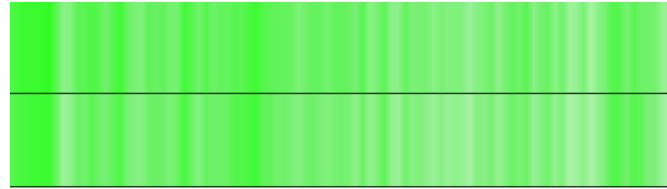

Astrocyte vs. NSC

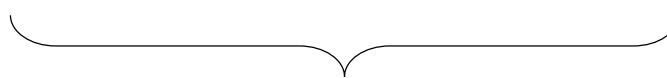

## Examples of detailed correlation gene network

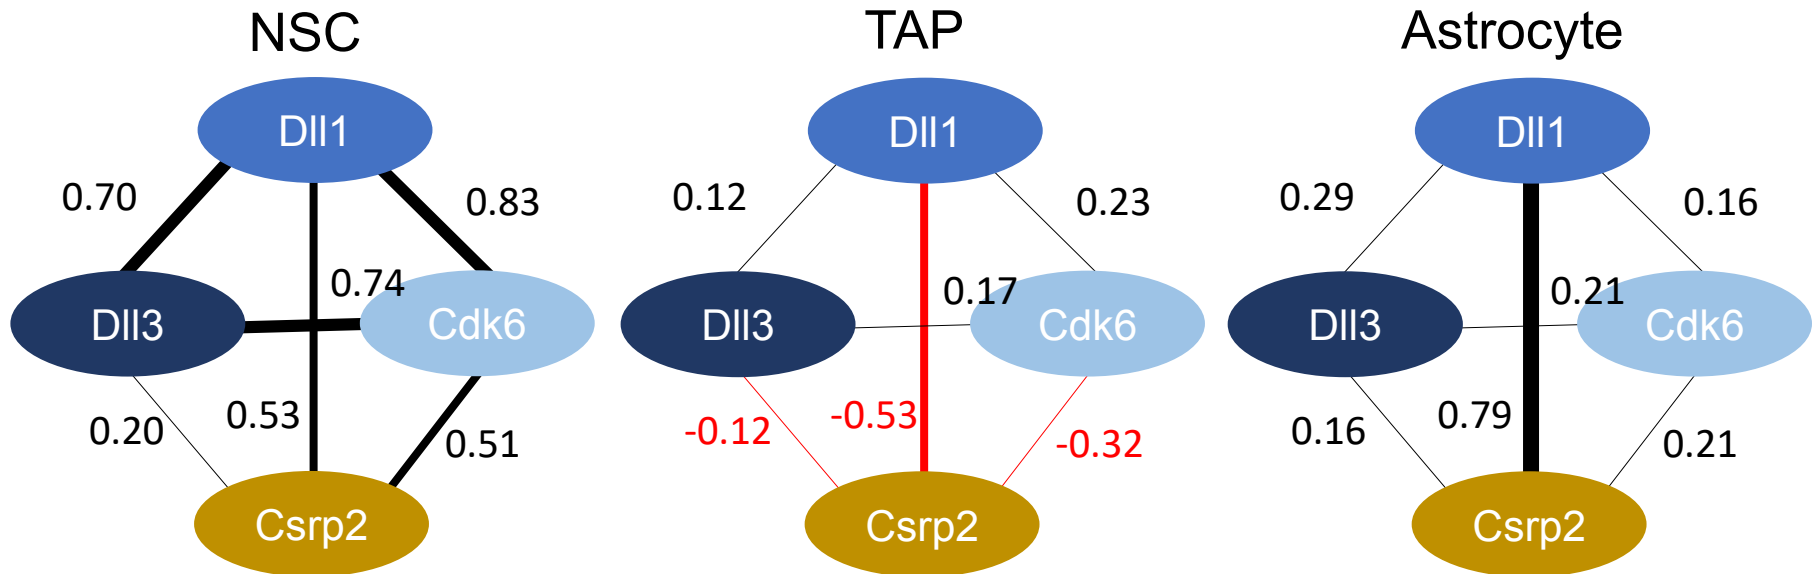

Fig. S2

# JMV449

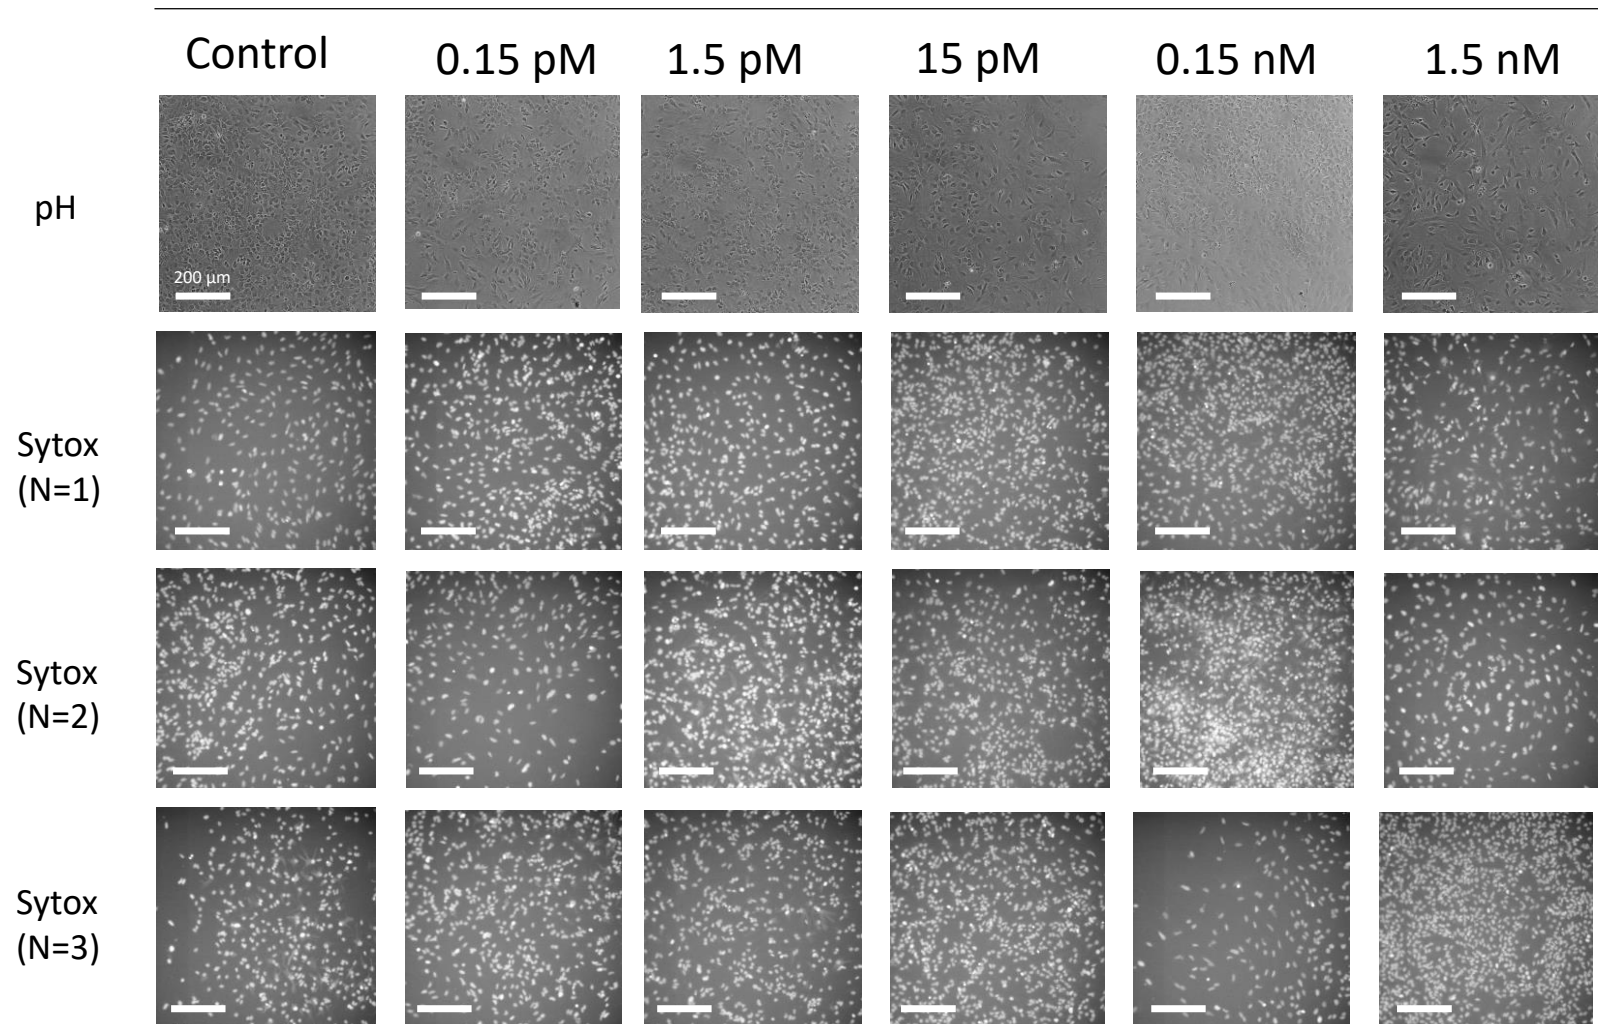

Fig. S3

**Table S1** Gene list for each module

| EnsembleID         | Symbol        | GeneID | Module      |
|--------------------|---------------|--------|-------------|
| ENSMUSG00000057156 | Homez         | 239099 | brown       |
| ENSMUSG00000057157 | NA            | NA     | blue        |
| ENSMUSG00000035762 | Tmem161b      | 72745  | turquoise   |
| ENSMUSG00000092056 | NA            | NA     | lightcyan   |
| ENSMUSG00000063931 | Pepd          | 18624  | brown       |
| ENSMUSG00000035764 | Fbxo45        | 268882 | grey60      |
| ENSMUSG00000042492 | Tbc1d10b      | 68449  | turquoise   |
| ENSMUSG00000035765 | Dym           | 69190  | turquoise   |
| ENSMUSG00000060152 | Pop5          | 117109 | turquoise   |
| ENSMUSG00000070667 | NA            | NA     | tan         |
| ENSMUSG00000003863 | Ppfia3        | 76787  | brown       |
| ENSMUSG00000021520 | Uqcrb         | 67530  | brown       |
| ENSMUSG00000003865 | Gys1          | 14936  | turquoise   |
| ENSMUSG00000003868 | Ruvbl2        | 20174  | purple      |
| ENSMUSG00000000085 | Scmh1         | 29871  | turquoise   |
| ENSMUSG00000000088 | Cox5a         | 12858  | turquoise   |
| ENSMUSG00000018293 | Pfn1          | 18643  | black       |
| ENSMUSG00000085099 | NA            | NA     | turquoise   |
| ENSMUSG00000029221 | NA            | NA     | turquoise   |
| ENSMUSG00000039735 | Fnbp1l        | 214459 | blue        |
| ENSMUSG00000029223 | Uchl1         | 22223  | blue        |
| ENSMUSG00000053192 | NA            | NA     | blue        |
| ENSMUSG00000064120 | Mocs1         | 56738  | turquoise   |
| ENSMUSG00000039737 | NA            | NA     | blue        |
| ENSMUSG00000100750 | NA            | NA     | turquoise   |
| ENSMUSG00000039738 | Slx4          | 52864  | turquoise   |
| ENSMUSG00000029227 | Fip1l1        | 66899  | blue        |
| ENSMUSG00000074637 | Sox2          | 20674  | turquoise   |
| ENSMUSG00000064125 | Prr36         | 73072  | blue        |
| ENSMUSG00000029229 | NA            | NA     | turquoise   |
| ENSMUSG00000100755 | NA            | NA     | red         |
| ENSMUSG00000021290 | 2010107E04Rik | 70257  | blue        |
| ENSMUSG00000064127 | Med14         | 26896  | greenyellow |
| ENSMUSG00000064128 | Cenpj         | 219103 | blue        |
| ENSMUSG00000007836 | Hnrnpa0       | 77134  | green       |
| ENSMUSG00000032220 | Myo1e         | 71602  | brown       |
| ENSMUSG00000007837 | Prrg2         | 65116  | turquoise   |
| ENSMUSG00000004054 | Map3k11       | 26403  | turquoise   |
| ENSMUSG00000042737 | Dpm3          | 68563  | green       |
| ENSMUSG00000004056 | Akt2          | 11652  | brown       |
| ENSMUSG00000032228 | Tcf12         | 21406  | blue        |
| ENSMUSG00000108452 | NA            | NA     | turquoise   |
| ENSMUSG00000000326 | Comt          | 12846  | yellow      |
| ENSMUSG00000108456 | NA            | NA     | turquoise   |
| ENSMUSG00000057160 | NA            | NA     | magenta     |
| ENSMUSG00000078604 | NA            | NA     | brown       |
| ENSMUSG00000095847 | NA            | NA     | tan         |
| ENSMUSG00000092062 | NA            | NA     | turquoise   |
| ENSMUSG00000085334 | NA            | NA     | blue        |
| ENSMUSG00000078607 | NA            | NA     | turquoise   |

|                    |               |        |             |
|--------------------|---------------|--------|-------------|
| ENSMUSG00000035770 | Dync1li2      | 234663 | green       |
| ENSMUSG00000035772 | Mrps2         | 118451 | brown       |
| ENSMUSG00000025260 | Hsd17b10      | 15108  | green       |
| ENSMUSG00000025261 | Huwe1         | 59026  | brown       |
| ENSMUSG00000025262 | NA            | NA     | turquoise   |
| ENSMUSG00000035776 | Cd99l2        | 171486 | turquoise   |
| ENSMUSG00000081600 | NA            | NA     | greenyellow |
| ENSMUSG00000025264 | Tsr2          | 69499  | turquoise   |
| ENSMUSG00000025265 | Fgd1          | 14163  | turquoise   |
| ENSMUSG00000025266 | Gnl3l         | 237107 | green       |
| ENSMUSG00000046707 | Csnk2a2       | 13000  | pink        |
| ENSMUSG00000081603 | NA            | NA     | red         |
| ENSMUSG00000053436 | Mapk14        | 26416  | brown       |
| ENSMUSG00000081604 | NA            | NA     | black       |
| ENSMUSG00000025268 | Maged2        | 80884  | blue        |
| ENSMUSG00000046709 | Mapk10        | 26414  | yellow      |
| ENSMUSG00000025269 | Apex2         | 77622  | turquoise   |
| ENSMUSG00000060166 | Zdhhc8        | 27801  | yellow      |
| ENSMUSG00000003873 | Bax           | 12028  | green       |
| ENSMUSG00000081607 | NA            | NA     | turquoise   |
| ENSMUSG00000021532 | Fastkd3       | 69577  | pink        |
| ENSMUSG00000021536 | Adcy2         | 210044 | yellow      |
| ENSMUSG00000021537 | Cetn3         | 12626  | black       |
| ENSMUSG00000078370 | NA            | NA     | greenyellow |
| ENSMUSG00000078377 | NA            | NA     | black       |
| ENSMUSG00000039740 | Alg2          | 56737  | yellow      |
| ENSMUSG00000039741 | Bahcc1        | 268515 | blue        |
| ENSMUSG00000104496 | NA            | NA     | red         |
| ENSMUSG00000081370 | NA            | NA     | turquoise   |
| ENSMUSG00000029233 | Srd5a3        | 57357  | turquoise   |
| ENSMUSG00000029234 | Tmem165       | 21982  | turquoise   |
| ENSMUSG00000039748 | NA            | NA     | red         |
| ENSMUSG00000092300 | Cdk3-ps       | 69681  | turquoise   |
| ENSMUSG00000081373 | NA            | NA     | lightcyan   |
| ENSMUSG00000029238 | Clock         | 12753  | green       |
| ENSMUSG00000057406 | Whsc1         | 107823 | salmon      |
| ENSMUSG00000074649 | BC029722      | 613262 | turquoise   |
| ENSMUSG00000057409 | NA            | NA     | turquoise   |
| ENSMUSG00000081378 | Rps13-ps4     | 628061 | turquoise   |
| ENSMUSG00000064138 | Fam172a       | 68675  | turquoise   |
| ENSMUSG00000100768 | NA            | NA     | greenyellow |
| ENSMUSG00000042742 | B630005N14Ril | 101148 | turquoise   |
| ENSMUSG00000042743 | Sgtb          | 218544 | turquoise   |
| ENSMUSG00000025503 | Taldo1        | 21351  | black       |
| ENSMUSG00000042744 | Gm15800       | 269700 | brown       |
| ENSMUSG00000042745 | Id1           | 15901  | turquoise   |
| ENSMUSG00000025505 | Tmem80        | 71448  | grey60      |
| ENSMUSG00000042747 | Krtcap2       | 66059  | pink        |
| ENSMUSG00000032235 | Ice2          | 93697  | turquoise   |
| ENSMUSG00000025507 | Pidd1         | 57913  | salmon      |
| ENSMUSG00000025508 | Rplp2         | 67186  | black       |
| ENSMUSG00000004069 | Dnaja3        | 83945  | blue        |
| ENSMUSG00000025509 | Pnpla2        | 66853  | turquoise   |
| ENSMUSG00000032238 | Rora          | 19883  | turquoise   |

|                    |               |           |              |
|--------------------|---------------|-----------|--------------|
| ENSMUSG00000032239 | Rp9           | 55934     | brown        |
| ENSMUSG00000000339 | Rtca          | 66368     | brown        |
| ENSMUSG00000068101 | Cenpm         | 66570     | magenta      |
| ENSMUSG00000085342 | NA            | NA        | black        |
| ENSMUSG00000057176 | Ccdc189       | 233899    | turquoise    |
| ENSMUSG00000092072 | NA            | NA        | green        |
| ENSMUSG00000092074 | NA            | NA        | red          |
| ENSMUSG00000035781 | R3hdm4        | 109284    | blue         |
| ENSMUSG00000078619 | Smarcd2       | 83796     | turquoise    |
| ENSMUSG00000018541 | Cwc25         | 67480     | turquoise    |
| ENSMUSG00000063952 | Brpf3         | 268936    | blue         |
| ENSMUSG00000046711 | Hmga1         | 15361     | brown        |
| ENSMUSG00000063953 | Amd2          | 100041585 | turquoise    |
| ENSMUSG00000025272 | Tro           | 56191     | blue         |
| ENSMUSG00000018547 | Pip4k2b       | 108083    | brown        |
| ENSMUSG00000036202 | Rif1          | 51869     | blue         |
| ENSMUSG00000081611 | NA            | NA        | brown        |
| ENSMUSG00000018548 | Trim37        | 68729     | red          |
| ENSMUSG00000008035 | Mid1ip1       | 68041     | turquoise    |
| ENSMUSG00000025277 | Abhd6         | 66082     | yellow       |
| ENSMUSG00000008036 | Ap2s1         | 232910    | brown        |
| ENSMUSG00000025278 | Flnb          | 286940    | blue         |
| ENSMUSG00000071102 | NA            | NA        | turquoise    |
| ENSMUSG00000071103 | 1700029J07Rik | 69479     | turquoise    |
| ENSMUSG00000036208 | Nepro         | 212547    | lightcyan    |
| ENSMUSG00000021540 | Smad5         | 17129     | turquoise    |
| ENSMUSG00000021546 | Hnrnpk        | 15387     | midnightblue |
| ENSMUSG00000021548 | Ccnh          | 66671     | blue         |
| ENSMUSG00000021549 | Rasa1         | 218397    | blue         |
| ENSMUSG00000108702 | NA            | NA        | blue         |
| ENSMUSG00000039753 | Fbx15         | 242960    | brown        |
| ENSMUSG00000039754 | Alkbh4        | 72041     | brown        |
| ENSMUSG00000057411 | Fam173a       | 214917    | turquoise    |
| ENSMUSG00000039756 | Dnttip2       | 99480     | green        |
| ENSMUSG00000067924 | Cxx1b         | 553127    | turquoise    |
| ENSMUSG00000067925 | Cxx1a         | 66158     | turquoise    |
| ENSMUSG00000056999 | Ide           | 15925     | brown        |
| ENSMUSG00000029245 | Epha5         | 13839     | turquoise    |
| ENSMUSG00000081382 | NA            | NA        | tan          |
| ENSMUSG00000091896 | Ube2d2a       | 56550     | blue         |
| ENSMUSG00000039759 | Thap3         | 69876     | turquoise    |
| ENSMUSG00000067928 | Zfp760        | 240034    | brown        |
| ENSMUSG00000007850 | Hnrnp1        | 59013     | green        |
| ENSMUSG00000029247 | Paics         | 67054     | blue         |
| ENSMUSG00000074656 | Eif2s2        | 67204     | green        |
| ENSMUSG00000074657 | Kif5a         | 16572     | turquoise    |
| ENSMUSG00000064145 | Arih2         | 23807     | blue         |
| ENSMUSG00000042750 | Bex2          | 12069     | black        |
| ENSMUSG00000004070 | Hmox2         | 15369     | brown        |
| ENSMUSG00000004071 | Cdip1         | 66626     | midnightblue |
| ENSMUSG00000025511 | Tspan4        | 64540     | turquoise    |
| ENSMUSG00000025512 | Chid1         | 68038     | turquoise    |
| ENSMUSG00000070923 | Kihl9         | 242521    | turquoise    |
| ENSMUSG00000015002 | Efr3a         | 76740     | turquoise    |

|                    |               |        |             |
|--------------------|---------------|--------|-------------|
| ENSMUSG00000032244 | Fem1b         | 14155  | blue        |
| ENSMUSG00000032245 | Cln6          | 76524  | turquoise   |
| ENSMUSG00000099592 | NA            | NA     | yellow      |
| ENSMUSG00000032249 | Anp32a        | 11737  | green       |
| ENSMUSG00000000340 | Dbt           | 13171  | turquoise   |
| ENSMUSG00000060419 | NA            | NA     | black       |
| ENSMUSG00000099597 | NA            | NA     | pink        |
| ENSMUSG00000000346 | Dazap2        | 23994  | turquoise   |
| ENSMUSG00000057181 | 5730455P16Rik | 70591  | green       |
| ENSMUSG00000078622 | NA            | NA     | blue        |
| ENSMUSG00000095865 | NA            | NA     | red         |
| ENSMUSG00000035790 | Cep19         | 66994  | turquoise   |
| ENSMUSG00000068114 | Ccdc134       | 76457  | turquoise   |
| ENSMUSG00000068115 | Ninl          | 78177  | blue        |
| ENSMUSG00000025280 | Polr3a        | 218832 | grey60      |
| ENSMUSG00000046721 | NA            | NA     | black       |
| ENSMUSG00000046722 | Cdc42se1      | 57912  | green       |
| ENSMUSG00000025283 | Sat1          | 20229  | red         |
| ENSMUSG00000053453 | Thoc7         | 66231  | red         |
| ENSMUSG00000060181 | Slc35e3       | 215436 | blue        |
| ENSMUSG00000035798 | Zdhhc17       | 320150 | turquoise   |
| ENSMUSG00000081622 | NA            | NA     | red         |
| ENSMUSG00000046727 | NA            | NA     | yellow      |
| ENSMUSG00000036214 | Znrd1as       | 76416  | turquoise   |
| ENSMUSG00000018559 | Ctdnep1       | 67181  | blue        |
| ENSMUSG00000025287 | Acot9         | 56360  | turquoise   |
| ENSMUSG00000070697 | Utp3          | 65961  | green       |
| ENSMUSG00000025289 | Prdx4         | 53381  | brown       |
| ENSMUSG00000070699 | Sars2         | 71984  | green       |
| ENSMUSG00000036218 | Pdzrn4        | 239618 | green       |
| ENSMUSG00000021550 | 2210016F16Rik | 70153  | green       |
| ENSMUSG00000081629 | NA            | NA     | grey60      |
| ENSMUSG00000021552 | Gkap1         | 56278  | brown       |
| ENSMUSG00000021553 | Slc28a3       | 114304 | turquoise   |
| ENSMUSG00000021555 | Naa35         | 78689  | blue        |
| ENSMUSG00000021556 | Golm1         | 105348 | magenta     |
| ENSMUSG00000021557 | Agtpbp1       | 67269  | turquoise   |
| ENSMUSG00000004317 | Clcn5         | 12728  | yellow      |
| ENSMUSG00000021559 | Dapk1         | 69635  | greenyellow |
| ENSMUSG00000004319 | Clcn3         | 12725  | yellow      |
| ENSMUSG00000099835 | NA            | NA     | turquoise   |
| ENSMUSG00000108713 | NA            | NA     | turquoise   |
| ENSMUSG00000096054 | Syne1         | 64009  | purple      |
| ENSMUSG00000067931 | Zfp948        | 381066 | blue        |
| ENSMUSG00000039763 | Dnajc28       | 246738 | yellow      |
| ENSMUSG00000029250 | Polr2b        | 231329 | red         |
| ENSMUSG00000039765 | Cc2d2a        | 231214 | turquoise   |
| ENSMUSG00000029253 | Cenpc1        | 12617  | turquoise   |
| ENSMUSG00000057421 | Las1l         | 76130  | turquoise   |
| ENSMUSG00000081390 | NA            | NA     | pink        |
| ENSMUSG00000039768 | Dnajc11       | 230935 | red         |
| ENSMUSG00000081394 | Gm13215       | 664894 | tan         |
| ENSMUSG00000092325 | NA            | NA     | brown       |
| ENSMUSG00000014592 | Camta1        | 100072 | green       |

|                    |          |        |             |
|--------------------|----------|--------|-------------|
| ENSMUSG00000025521 | Tmem192  | 73067  | turquoise   |
| ENSMUSG00000007867 | Ift43    | 76411  | turquoise   |
| ENSMUSG00000042763 | Maneal   | 215090 | blue        |
| ENSMUSG00000032251 | Irak1bp1 | 65099  | purple      |
| ENSMUSG00000032252 | Glce     | 93683  | blue        |
| ENSMUSG00000032253 | Phip     | 83946  | blue        |
| ENSMUSG00000025525 | Apool    | 68117  | green       |
| ENSMUSG00000004085 | Zak      | 65964  | cyan        |
| ENSMUSG00000070934 | Rraga    | 68441  | turquoise   |
| ENSMUSG00000032254 | Kif23    | 71819  | magenta     |
| ENSMUSG00000015013 | Trappc2l | 59005  | yellow      |
| ENSMUSG00000101209 | NA       | NA     | green       |
| ENSMUSG00000060424 | Pantr1   | 66297  | greenyellow |
| ENSMUSG00000015016 | Acsf3    | 257633 | turquoise   |
| ENSMUSG00000032258 | Lca5     | 75782  | turquoise   |
| ENSMUSG00000070939 | Tgfbrap1 | 73122  | turquoise   |
| ENSMUSG00000060427 | Zfp868   | 234362 | grey60      |
| ENSMUSG00000108483 | NA       | NA     | yellow      |
| ENSMUSG00000000355 | Mcts1    | 68995  | brown       |
| ENSMUSG00000078630 | Tomt     | 791260 | yellow      |
| ENSMUSG00000057191 | AB124611 | 382062 | turquoise   |
| ENSMUSG00000057193 | Slc44a2  | 68682  | turquoise   |
| ENSMUSG00000078635 | NA       | NA     | turquoise   |
| ENSMUSG00000085363 | NA       | NA     | turquoise   |
| ENSMUSG00000078636 | NA       | NA     | turquoise   |
| ENSMUSG00000025290 | Rps24    | 20088  | black       |
| ENSMUSG00000063972 | Nr6a1    | 14536  | greenyellow |
| ENSMUSG00000053460 | Ggcx     | 56316  | turquoise   |
| ENSMUSG00000018565 | Elp5     | 54351  | green       |
| ENSMUSG00000018566 | Slc2a4   | 20528  | brown       |
| ENSMUSG00000018567 | Gabarap  | 56486  | greenyellow |
| ENSMUSG00000036223 | Ska1     | 66468  | magenta     |
| ENSMUSG00000074909 | Ranbp6   | 240614 | blue        |
| ENSMUSG00000060198 | NA       | NA     | black       |
| ENSMUSG00000021569 | NA       | NA     | magenta     |
| ENSMUSG00000099843 | NA       | NA     | turquoise   |
| ENSMUSG00000039770 | Ypel5    | 383295 | yellow      |
| ENSMUSG00000039771 | Polr2j   | 20022  | black       |
| ENSMUSG00000067942 | Zfp160   | 224585 | turquoise   |
| ENSMUSG00000029263 | Pigg     | 433931 | blue        |
| ENSMUSG00000029265 | Dr1      | 13486  | brown       |
| ENSMUSG00000029267 | Mtf2     | 17765  | red         |
| ENSMUSG00000100794 | NA       | NA     | turquoise   |
| ENSMUSG00000007872 | NA       | NA     | purple      |
| ENSMUSG00000018800 | Abca5    | 217265 | turquoise   |
| ENSMUSG00000042770 | Hebp1    | 15199  | turquoise   |
| ENSMUSG00000042772 | Smg7     | 226517 | blue        |
| ENSMUSG00000025531 | Chm      | 12662  | turquoise   |
| ENSMUSG00000025532 | Crcp     | 12909  | green       |
| ENSMUSG00000025533 | Asl      | 109900 | turquoise   |
| ENSMUSG00000032262 | Elovl4   | 83603  | brown       |
| ENSMUSG00000053702 | Nebi     | 74103  | purple      |
| ENSMUSG00000025534 | Gusb     | 110006 | yellow      |
| ENSMUSG00000032263 | Bckdhh   | 12040  | turquoise   |

|                    |               |        |              |
|--------------------|---------------|--------|--------------|
| ENSMUSG00000032264 | Zw10          | 26951  | blue         |
| ENSMUSG00000004096 | Cwc15         | 66070  | turquoise    |
| ENSMUSG00000015023 | Ddx19a        | 13680  | blue         |
| ENSMUSG00000018809 | Smyd4         | 319822 | turquoise    |
| ENSMUSG00000101219 | NA            | NA     | tan          |
| ENSMUSG00000025537 | Phkg1         | 18682  | black        |
| ENSMUSG00000025538 | Sumf2         | 67902  | yellow       |
| ENSMUSG00000032267 | Usp28         | 235323 | blue         |
| ENSMUSG00000004099 | Dnmt1         | 13433  | salmon       |
| ENSMUSG00000060438 | NA            | NA     | black        |
| ENSMUSG00000108496 | NA            | NA     | pink         |
| ENSMUSG00000021807 | 2700060E02Rik | 68045  | blue         |
| ENSMUSG00000021809 | Nudt13        | 67725  | turquoise    |
| ENSMUSG00000068130 | NA            | NA     | grey60       |
| ENSMUSG00000104761 | NA            | NA     | turquoise    |
| ENSMUSG00000068134 | Zfp120        | 104348 | turquoise    |
| ENSMUSG00000018572 | Phf23         | 78246  | blue         |
| ENSMUSG00000085379 | NA            | NA     | turquoise    |
| ENSMUSG00000029500 | Pgam5         | 72542  | black        |
| ENSMUSG00000018574 | Acadvl        | 11370  | turquoise    |
| ENSMUSG00000029501 | Ankle2        | 71782  | turquoise    |
| ENSMUSG00000053470 | Kdm3a         | 104263 | greenyellow  |
| ENSMUSG00000029502 | Golga3        | 269682 | blue         |
| ENSMUSG00000046743 | Fat4          | 329628 | turquoise    |
| ENSMUSG00000081640 | NA            | NA     | tan          |
| ENSMUSG00000029505 | Ep400         | 75560  | blue         |
| ENSMUSG00000081642 | NA            | NA     | turquoise    |
| ENSMUSG00000053475 | Tnfaip6       | 21930  | yellow       |
| ENSMUSG00000081643 | NA            | NA     | blue         |
| ENSMUSG00000029507 | Pus1          | 56361  | green        |
| ENSMUSG00000074916 | Chst14        | 72136  | yellow       |
| ENSMUSG00000053477 | Tcf4          | 21413  | midnightblue |
| ENSMUSG00000074918 | NA            | NA     | red          |
| ENSMUSG00000014846 | Tppp3         | 67971  | greenyellow  |
| ENSMUSG00000021576 | Pdcd6         | 18570  | turquoise    |
| ENSMUSG00000021577 | Sdha          | 66945  | brown        |
| ENSMUSG00000032504 | Pdcd6ip       | 18571  | red          |
| ENSMUSG00000021578 | NA            | NA     | brown        |
| ENSMUSG00000032508 | Myd88         | 17874  | turquoise    |
| ENSMUSG00000000600 | Krit1         | 79264  | blue         |
| ENSMUSG00000099858 | NA            | NA     | salmon       |
| ENSMUSG00000000605 | Clcn4         | 12727  | turquoise    |
| ENSMUSG00000039782 | Cpeb2         | 231207 | yellow       |
| ENSMUSG00000057440 | Mpp7          | 75739  | turquoise    |
| ENSMUSG00000074682 | Zcchc3        | 67917  | turquoise    |
| ENSMUSG00000085611 | NA            | NA     | turquoise    |
| ENSMUSG00000039789 | Zfp597        | 71063  | yellow       |
| ENSMUSG00000029276 | Glmn          | 170823 | turquoise    |
| ENSMUSG00000092341 | Malat1        | 72289  | red          |
| ENSMUSG00000007880 | Arid1a        | 93760  | cyan         |
| ENSMUSG00000092344 | NA            | NA     | cyan         |
| ENSMUSG00000008301 | Phax          | 56698  | blue         |
| ENSMUSG00000042784 | Muc1          | 17829  | turquoise    |
| ENSMUSG00000025544 | Tm9sf2        | 68059  | yellow       |



|                     |               |    |        |             |
|---------------------|---------------|----|--------|-------------|
| ENSMUSG00000070953  | Rabepk        |    | 227746 | turquoise   |
| ENSMUSG00000025545  | Clybl         |    | 69634  | turquoise   |
| ENSMUSG00000053714  | NA            | NA |        | turquoise   |
| ENSMUSG00000008305  | Tle1          |    | 21885  | brown       |
| ENSMUSG00000008307  | 1700109H08Rik |    | 77036  | turquoise   |
| ENSMUSG00000032279  | Idh3a         |    | 67834  | green       |
| ENSMUSG00000021810  | Ecd           |    | 70601  | green       |
| ENSMUSG00000043207  | Zmpste24      |    | 230709 | turquoise   |
| ENSMUSG00000021811  | Dnajc9        |    | 108671 | red         |
| ENSMUSG00000021814  | Anxa7         |    | 11750  | turquoise   |
| ENSMUSG00000000374  | Trappc10      |    | 216131 | turquoise   |
| ENSMUSG00000021816  | Ppp3cb        |    | 19056  | red         |
| ENSMUSG00000000378  | Ccm2          |    | 216527 | green       |
| ENSMUSG00000021819  | Zswim8        |    | 268721 | turquoise   |
| ENSMUSG00000011306  | Sugp1         |    | 70616  | turquoise   |
| ENSMUSG00000078652  | Psme3         |    | 19192  | blue        |
| ENSMUSG00000068141  | NA            | NA |        | red         |
| ENSMUSG00000078656  | Vps25         |    | 28084  | yellow      |
| ENSMUSG000000085385 | NA            | NA |        | blue        |
| ENSMUSG00000104777  | NA            | NA |        | yellow      |
| ENSMUSG00000018583  | NA            | NA |        | black       |
| ENSMUSG00000029510  | Gpc2          |    | 71951  | turquoise   |
| ENSMUSG00000018585  | Atox1         |    | 11927  | blue        |
| ENSMUSG00000046753  | Ccdc66        |    | 320234 | turquoise   |
| ENSMUSG00000029512  | Ulk1          |    | 22241  | brown       |
| ENSMUSG00000074922  | NA            | NA |        | yellow      |
| ENSMUSG00000029513  | Prkab1        |    | 19079  | brown       |
| ENSMUSG00000036241  | Ube2r2        |    | 67615  | grey60      |
| ENSMUSG00000081651  | NA            | NA |        | brown       |
| ENSMUSG00000053483  | Usp21         |    | 30941  | blue        |
| ENSMUSG00000046756  | NA            | NA |        | turquoise   |
| ENSMUSG00000074925  | Ptar1         |    | 72351  | yellow      |
| ENSMUSG00000029516  | Cit           |    | 12704  | magenta     |
| ENSMUSG00000071141  | NA            | NA |        | blue        |
| ENSMUSG00000036246  | Gmip          |    | 78816  | turquoise   |
| ENSMUSG00000029518  | NA            | NA |        | turquoise   |
| ENSMUSG00000014850  | Msh3          |    | 17686  | brown       |
| ENSMUSG00000081657  | NA            | NA |        | turquoise   |
| ENSMUSG00000014856  | Tmem208       |    | 66320  | turquoise   |
| ENSMUSG00000032512  | Wdr48         |    | 67561  | red         |
| ENSMUSG00000032513  | Gorasp1       |    | 74498  | turquoise   |
| ENSMUSG00000022000  | Zc3h13        |    | 67302  | pink        |
| ENSMUSG00000014859  | E2f4          |    | 104394 | green       |
| ENSMUSG00000004347  | Pde1c         |    | 18575  | greenyellow |
| ENSMUSG00000021589  | Rhobtb3       |    | 73296  | blue        |
| ENSMUSG00000032518  | Rpsa          |    | 16785  | black       |
| ENSMUSG00000032519  | Slc25a38      |    | 208638 | turquoise   |
| ENSMUSG00000022008  | Gpalpp1       |    | 67467  | turquoise   |
| ENSMUSG00000022009  | Nufip1        |    | 27275  | salmon      |
| ENSMUSG00000096086  | NA            | NA |        | pink        |
| ENSMUSG00000039795  | Zfand1        |    | 66361  | turquoise   |
| ENSMUSG00000029283  | Cdc7          |    | 12545  | salmon      |
| ENSMUSG00000064181  | Rab3ip        |    | 216363 | pink        |
| ENSMUSG00000085622  | 3110056K07Rik |    | 73204  | turquoise   |

|                    |         |        |             |
|--------------------|---------|--------|-------------|
| ENSMUSG00000085623 | NA      | NA     | turquoise   |
| ENSMUSG00000007891 | Ctsd    | 13033  | blue        |
| ENSMUSG00000007892 | Rplp1   | 56040  | black       |
| ENSMUSG00000074698 | Csnk2a1 | 12995  | green       |
| ENSMUSG00000018820 | Zfyve27 | 319740 | turquoise   |
| ENSMUSG00000042790 | Rnf214  | 235315 | turquoise   |
| ENSMUSG00000085627 | NA      | NA     | blue        |
| ENSMUSG00000025551 | Fgf14   | 14169  | turquoise   |
| ENSMUSG00000032280 | Tle3    | 21887  | black       |
| ENSMUSG00000092358 | NA      | NA     | tan         |
| ENSMUSG00000032281 | Acsbg1  | 94180  | purple      |
| ENSMUSG00000060450 | Rnf14   | 56736  | blue        |
| ENSMUSG00000101236 | NA      | NA     | red         |
| ENSMUSG00000025555 | Farp1   | 223254 | blue        |
| ENSMUSG00000042797 | Aqp11   | 66333  | yellow      |
| ENSMUSG00000008318 | Relt    | 320100 | turquoise   |
| ENSMUSG00000032288 | Imp3    | 102462 | pink        |
| ENSMUSG00000021820 | Camk2g  | 12325  | purple      |
| ENSMUSG00000021823 | Vcl     | 22330  | greenyellow |
| ENSMUSG00000000384 | Tbrg4   | 21379  | blue        |
| ENSMUSG00000021824 | NA      | NA     | turquoise   |
| ENSMUSG00000104784 | NA      | NA     | turquoise   |
| ENSMUSG00000085396 | Firre   | 103012 | turquoise   |
| ENSMUSG00000105201 | NA      | NA     | blue        |
| ENSMUSG00000018593 | Sparc   | 20692  | blue        |
| ENSMUSG00000104788 | NA      | NA     | yellow      |
| ENSMUSG00000029521 | Chek2   | 50883  | magenta     |
| ENSMUSG00000074930 | NA      | NA     | pink        |
| ENSMUSG00000029524 | Sirt4   | 75387  | yellow      |
| ENSMUSG00000018599 | Mief2   | 237781 | blue        |
| ENSMUSG00000081664 | NA      | NA     | pink        |
| ENSMUSG00000029528 | Pxn     | 19303  | turquoise   |
| ENSMUSG00000036257 | NA      | NA     | turquoise   |
| ENSMUSG00000021591 | Glrx    | 93692  | yellow      |
| ENSMUSG00000021592 | Arsk    | 77041  | turquoise   |
| ENSMUSG00000021594 | Srd5a1  | 78925  | blue        |
| ENSMUSG00000021595 | Nsun2   | 28114  | red         |
| ENSMUSG00000014867 | Surf4   | 20932  | brown       |
| ENSMUSG00000022010 | Tsc22d1 | 21807  | turquoise   |
| ENSMUSG00000021597 | Sif1    | 105377 | green       |
| ENSMUSG00000004356 | Utp20   | 70683  | turquoise   |
| ENSMUSG00000032525 | Nktr    | 18087  | blue        |
| ENSMUSG00000022012 | Enox1   | 239188 | brown       |
| ENSMUSG00000032526 | Deb1    | 26901  | turquoise   |
| ENSMUSG00000022013 | Dnajc15 | 66148  | blue        |
| ENSMUSG00000099870 | NA      | NA     | brown       |
| ENSMUSG00000032527 | Pccb    | 66904  | brown       |
| ENSMUSG00000022016 | Akap11  | 219181 | turquoise   |
| ENSMUSG00000022018 | Rgcc    | 66214  | black       |
| ENSMUSG00000099875 | NA      | NA     | salmon      |
| ENSMUSG00000022019 | Tdrd3   | 219249 | blue        |
| ENSMUSG00000029290 | Zfp326  | 54367  | green       |
| ENSMUSG00000029291 | Rufy3   | 52822  | blue        |
| ENSMUSG00000000628 | Hk2     | 15277  | cyan        |

|                    |               |           |              |
|--------------------|---------------|-----------|--------------|
| ENSMUSG00000078903 | NA            | NA        | turquoise    |
| ENSMUSG00000064193 | NA            | NA        | purple       |
| ENSMUSG00000078908 | Mon1b         | 270096    | brown        |
| ENSMUSG00000057469 | E2f6          | 50496     | yellow       |
| ENSMUSG00000092368 | NA            | NA        | brown        |
| ENSMUSG00000032290 | Ptpn9         | 56294     | brown        |
| ENSMUSG00000053730 | Tmem39b       | 230770    | brown        |
| ENSMUSG00000070972 | NA            | NA        | blue         |
| ENSMUSG00000032293 | Ireb2         | 64602     | blue         |
| ENSMUSG00000032294 | Pkm           | 18746     | midnightblue |
| ENSMUSG00000032295 | Man2c1        | 73744     | blue         |
| ENSMUSG00000101249 | NA            | NA        | yellow       |
| ENSMUSG00000043223 | NA            | NA        | pink         |
| ENSMUSG00000032298 | Neil1         | 72774     | turquoise    |
| ENSMUSG00000032299 | Commd4        | 66199     | red          |
| ENSMUSG00000060467 | NA            | NA        | green        |
| ENSMUSG00000021830 | Txndc16       | 70561     | turquoise    |
| ENSMUSG00000021831 | Ero1l         | 50527     | turquoise    |
| ENSMUSG00000021832 | Psmc6         | 67089     | green        |
| ENSMUSG00000000399 | Ndufa9        | 66108     | blue         |
| ENSMUSG00000078671 | Chd2          | 244059    | turquoise    |
| ENSMUSG00000078676 | Casc3         | 192160    | blue         |
| ENSMUSG00000068165 | NA            | NA        | brown        |
| ENSMUSG00000104795 | NA            | NA        | turquoise    |
| ENSMUSG00000008090 | Fgfr1l        | 116701    | purple       |
| ENSMUSG00000029534 | St7           | 64213     | blue         |
| ENSMUSG00000029535 | Triap1        | 69076     | blue         |
| ENSMUSG00000029536 | Gatc          | 384281    | blue         |
| ENSMUSG00000081673 | NA            | NA        | turquoise    |
| ENSMUSG00000029538 | Srsf9         | 108014    | red          |
| ENSMUSG00000057706 | Mex3b         | 108797    | salmon       |
| ENSMUSG00000064437 | Snord49b      | 100217426 | pink         |
| ENSMUSG00000004360 | 9330159F19Rik | 212448    | brown        |
| ENSMUSG00000014873 | Surf2         | 20931     | green        |
| ENSMUSG00000092607 | Scnm1         | 69269     | turquoise    |
| ENSMUSG00000032531 | Amotl2        | 56332     | cyan         |
| ENSMUSG00000004364 | Cul3          | 26554     | blue         |
| ENSMUSG00000022020 | Naa16         | 66897     | green        |
| ENSMUSG00000032534 | Cep63         | 28135     | blue         |
| ENSMUSG00000022021 | Diaph3        | 56419     | green        |
| ENSMUSG00000022022 | Mtrf1         | 211253    | grey60       |
| ENSMUSG00000060703 | Cd302         | 66205     | purple       |
| ENSMUSG00000032536 | Trak1         | 67095     | turquoise    |
| ENSMUSG00000022023 | Wbp4          | 22380     | green        |
| ENSMUSG00000011096 | Akt1s1        | 67605     | green        |
| ENSMUSG00000032537 | Ephb1         | 270190    | brown        |
| ENSMUSG00000022024 | Sugt1         | 67955     | green        |
| ENSMUSG00000025809 | Itgb1         | 16412     | green        |
| ENSMUSG00000099881 | 2810013P06Rik | 100503178 | turquoise    |
| ENSMUSG00000060708 | Bloc1s4       | 117197    | green        |
| ENSMUSG00000000631 | Myo18a        | 360013    | brown        |
| ENSMUSG00000108761 | NA            | NA        | greenyellow  |
| ENSMUSG00000000632 | Sez6          | 20370     | black        |
| ENSMUSG00000108764 | NA            | NA        | yellow       |

|                    |               |        |             |
|--------------------|---------------|--------|-------------|
| ENSMUSG00000085642 | NA            | NA     | turquoise   |
| ENSMUSG00000092374 | NA            | NA     | yellow      |
| ENSMUSG00000018841 | NA            | NA     | turquoise   |
| ENSMUSG00000078919 | Dpm1          | 13480  | turquoise   |
| ENSMUSG00000025571 | Tnrc6c        | 217351 | blue        |
| ENSMUSG00000053740 | NA            | NA     | blue        |
| ENSMUSG00000036501 | Fam13b        | 225358 | yellow      |
| ENSMUSG00000025574 | Tk1           | 21877  | magenta     |
| ENSMUSG00000018846 | Pank3         | 211347 | yellow      |
| ENSMUSG00000008333 | NA            | NA     | red         |
| ENSMUSG00000025575 | Cant1         | 76025  | turquoise   |
| ENSMUSG00000081911 | NA            | NA     | yellow      |
| ENSMUSG00000025576 | Rbfox3        | 52897  | blue        |
| ENSMUSG00000018848 | Rars          | 104458 | black       |
| ENSMUSG00000036503 | Rnf13         | 24017  | blue        |
| ENSMUSG00000025577 | Cbx2          | 12416  | blue        |
| ENSMUSG00000018849 | NA            | NA     | brown       |
| ENSMUSG00000036504 | NA            | NA     | turquoise   |
| ENSMUSG00000053746 | Ptrh1         | 329384 | greenyellow |
| ENSMUSG00000060475 | Wtap          | 60532  | turquoise   |
| ENSMUSG00000025579 | Gaa           | 14387  | blue        |
| ENSMUSG00000060477 | Irak2         | 108960 | turquoise   |
| ENSMUSG00000021840 | Mapk1ip1l     | 218975 | red         |
| ENSMUSG00000021843 | Ktn1          | 16709  | blue        |
| ENSMUSG00000021846 | Peli2         | 93834  | turquoise   |
| ENSMUSG00000078681 | Tm2d3         | 68634  | turquoise   |
| ENSMUSG00000078684 | NA            | NA     | turquoise   |
| ENSMUSG00000079101 | NA            | NA     | yellow      |
| ENSMUSG00000079104 | NA            | NA     | blue        |
| ENSMUSG00000105221 | NA            | NA     | pink        |
| ENSMUSG00000036270 | Edc4          | 234699 | green       |
| ENSMUSG00000079108 | Srp54b        | 665155 | green       |
| ENSMUSG00000046785 | Epm2aip1      | 77781  | yellow      |
| ENSMUSG00000079109 | NA            | NA     | blue        |
| ENSMUSG00000029545 | Acads         | 11409  | turquoise   |
| ENSMUSG00000036275 | 9530068E07Rik | 213673 | red         |
| ENSMUSG00000029547 | Ints1         | 68510  | brown       |
| ENSMUSG00000081684 | NA            | NA     | blue        |
| ENSMUSG00000071172 | Srsf3         | 20383  | black       |
| ENSMUSG00000082100 | NA            | NA     | purple      |
| ENSMUSG00000036278 | Macrodl       | 107227 | yellow      |
| ENSMUSG00000047205 | Dusp18        | 75219  | turquoise   |
| ENSMUSG00000019039 | Dalrd3        | 67789  | yellow      |
| ENSMUSG00000025810 | Nrp1          | 18186  | yellow      |
| ENSMUSG00000071176 | Arhgef10      | 234094 | turquoise   |
| ENSMUSG00000032540 | Abhd5         | 67469  | turquoise   |
| ENSMUSG00000025812 | Pard3         | 93742  | turquoise   |
| ENSMUSG00000025813 | Homer2        | 26557  | red         |
| ENSMUSG00000082107 | NA            | NA     | turquoise   |
| ENSMUSG00000025815 | Dhtkd1        | 209692 | green       |
| ENSMUSG00000022031 | Elp3          | 74195  | green       |
| ENSMUSG00000025816 | Sec61a2       | 57743  | blue        |
| ENSMUSG00000082109 | NA            | NA     | pink        |
| ENSMUSG00000025817 | Nudt5         | 53893  | green       |

|                    |               |    |        |             |
|--------------------|---------------|----|--------|-------------|
| ENSMUSG00000022033 | Pbk           |    | 52033  | magenta     |
| ENSMUSG00000015305 | Sash1         |    | 70097  | turquoise   |
| ENSMUSG00000032547 | Ryk           |    | 20187  | turquoise   |
| ENSMUSG00000022034 | Esco2         |    | 71988  | magenta     |
| ENSMUSG00000099891 | NA            | NA |        | brown       |
| ENSMUSG00000022035 | Ccdc25        |    | 67179  | green       |
| ENSMUSG00000032549 | Rab6b         |    | 270192 | blue        |
| ENSMUSG00000022037 | Clu           |    | 12759  | red         |
| ENSMUSG00000108772 | NA            | NA |        | black       |
| ENSMUSG00000067995 | Gtf2f2        |    | 68705  | brown       |
| ENSMUSG00000078923 | Ube2v1        |    | 66589  | turquoise   |
| ENSMUSG00000092384 | NA            | NA |        | turquoise   |
| ENSMUSG00000025580 | Eif4a3        |    | 192170 | blue        |
| ENSMUSG00000101262 | NA            | NA |        | tan         |
| ENSMUSG00000025583 | Rptor         |    | 74370  | blue        |
| ENSMUSG00000018858 | Ict1          |    | 68572  | green       |
| ENSMUSG00000053754 | Chd8          |    | 67772  | blue        |
| ENSMUSG00000026000 | Lancl1        |    | 14768  | blue        |
| ENSMUSG00000036513 | Commd2        |    | 52245  | blue        |
| ENSMUSG00000043241 | Upf2          |    | 326622 | turquoise   |
| ENSMUSG00000025586 | Cpeb1         |    | 12877  | turquoise   |
| ENSMUSG00000081924 | NA            | NA |        | pink        |
| ENSMUSG00000026003 | Acadl         |    | 11363  | greenyellow |
| ENSMUSG00000008348 | Ubc           |    | 22190  | turquoise   |
| ENSMUSG00000081926 | NA            | NA |        | red         |
| ENSMUSG00000026004 | Kansl1l       |    | 68691  | blue        |
| ENSMUSG00000071414 | NA            | NA |        | red         |
| ENSMUSG00000026005 | Rpe           |    | 66646  | brown       |
| ENSMUSG00000071415 | Rpl23         |    | 65019  | black       |
| ENSMUSG00000081929 | NA            | NA |        | lightcyan   |
| ENSMUSG00000004610 | Etfb          |    | 110826 | yellow      |
| ENSMUSG00000071419 | NA            | NA |        | tan         |
| ENSMUSG00000078695 | Cisd3         |    | 217149 | yellow      |
| ENSMUSG00000068184 | Ndufaf2       |    | 75597  | green       |
| ENSMUSG00000079111 | Kdelr2        |    | 66913  | turquoise   |
| ENSMUSG00000046791 | 2410016O06Rik |    | 71952  | brown       |
| ENSMUSG00000029550 | Sppl3         |    | 74585  | green       |
| ENSMUSG00000089628 | NA            | NA |        | brown       |
| ENSMUSG00000029551 | Psmg3         |    | 66506  | black       |
| ENSMUSG00000046792 | Zfp787        |    | 67109  | grey60      |
| ENSMUSG00000105233 | NA            | NA |        | tan         |
| ENSMUSG00000036281 | Snapc4        |    | 227644 | yellow      |
| ENSMUSG00000036282 | Naa30         |    | 70646  | turquoise   |
| ENSMUSG00000029554 | Mad1l1        |    | 17120  | blue        |
| ENSMUSG00000071180 | NA            | NA |        | pink        |
| ENSMUSG00000036285 | Noa1          |    | 56412  | blue        |
| ENSMUSG00000046798 | Cldn12        |    | 64945  | blue        |
| ENSMUSG00000081695 | NA            | NA |        | turquoise   |
| ENSMUSG00000047213 | Ythdf3        |    | 229096 | brown       |
| ENSMUSG00000082110 | NA            | NA |        | brown       |
| ENSMUSG00000029559 | NA            | NA |        | brown       |
| ENSMUSG00000047215 | Rpl9          |    | 20005  | black       |
| ENSMUSG00000101501 | NA            | NA |        | grey60      |
| ENSMUSG00000101502 | NA            | NA |        | black       |

|                    |               |    |        |              |
|--------------------|---------------|----|--------|--------------|
| ENSMUSG00000025821 | Zfp282        |    | 101095 | blue         |
| ENSMUSG00000032551 | 1110059G10Rik |    | 66202  | green        |
| ENSMUSG00000004383 | Large         |    | 16795  | turquoise    |
| ENSMUSG00000025823 | Pdia4         |    | 12304  | yellow       |
| ENSMUSG00000032553 | Srprb         |    | 20818  | brown        |
| ENSMUSG00000022040 | Ephx2         |    | 13850  | purple       |
| ENSMUSG00000025825 | Iscu          |    | 66383  | turquoise    |
| ENSMUSG00000032554 | Trf           |    | 22041  | cyan         |
| ENSMUSG00000032555 | Topbp1        |    | 235559 | green        |
| ENSMUSG00000022043 | Trim35        |    | 66854  | green        |
| ENSMUSG00000032557 | Uba5          |    | 66663  | brown        |
| ENSMUSG00000022044 | Stmn4         |    | 56471  | turquoise    |
| ENSMUSG00000032558 | Nphp3         |    | 74025  | brown        |
| ENSMUSG00000050213 | Snip1         |    | 76793  | turquoise    |
| ENSMUSG00000060727 | NA            | NA |        | brown        |
| ENSMUSG00000022048 | Dpysl2        |    | 12934  | midnightblue |
| ENSMUSG00000085666 | NA            | NA |        | blue         |
| ENSMUSG00000018861 | Fdxr          |    | 14149  | turquoise    |
| ENSMUSG00000057499 | NA            | NA |        | turquoise    |
| ENSMUSG00000025591 | Tma16         |    | 66282  | turquoise    |
| ENSMUSG00000015083 | C8g           |    | 69379  | turquoise    |
| ENSMUSG00000043252 | Tmem64        |    | 100201 | yellow       |
| ENSMUSG00000015085 | Entpd2        |    | 12496  | red          |
| ENSMUSG00000026014 | Raph1         |    | 77300  | turquoise    |
| ENSMUSG00000053768 | Chchd3        |    | 66075  | brown        |
| ENSMUSG00000015087 | Rab16         |    | 227624 | turquoise    |
| ENSMUSG00000053769 | Lysmd1        |    | 217779 | turquoise    |
| ENSMUSG00000071424 | NA            | NA |        | yellow       |
| ENSMUSG00000036529 | Sbf1          |    | 77980  | blue         |
| ENSMUSG00000043257 | NA            | NA |        | yellow       |
| ENSMUSG00000026017 | Carf          |    | 241066 | turquoise    |
| ENSMUSG00000043259 | Fam13c        |    | 71721  | turquoise    |
| ENSMUSG00000026019 | Wdr12         |    | 57750  | blue         |
| ENSMUSG00000021868 | Ppif          |    | 105675 | green        |
| ENSMUSG00000096361 | NA            | NA |        | green        |
| ENSMUSG00000029560 | Snx8          |    | 231834 | turquoise    |
| ENSMUSG00000105243 | NA            | NA |        | greenyellow  |
| ENSMUSG00000036291 | Ap5m1         |    | 74385  | brown        |
| ENSMUSG00000036292 | Gramd1c       |    | 207798 | brown        |
| ENSMUSG00000036295 | Lrrn3         |    | 16981  | yellow       |
| ENSMUSG00000019054 | Fis1          |    | 66437  | turquoise    |
| ENSMUSG00000019055 | Plod1         |    | 18822  | blue         |
| ENSMUSG00000071193 | NA            | NA |        | lightcyan    |
| ENSMUSG00000074978 | NA            | NA |        | tan          |
| ENSMUSG00000029569 | Tmem168       |    | 101118 | yellow       |
| ENSMUSG00000082120 | NA            | NA |        | turquoise    |
| ENSMUSG00000057738 | Sptan1        |    | 20740  | brown        |
| ENSMUSG00000036299 | BC031181      |    | 407819 | turquoise    |
| ENSMUSG00000032560 | Dnajc13       |    | 235567 | turquoise    |
| ENSMUSG00000004393 | Ddx56         |    | 52513  | turquoise    |
| ENSMUSG00000004394 | Tmed4         |    | 103694 | brown        |
| ENSMUSG00000032562 | Gnai2         |    | 14678  | yellow       |
| ENSMUSG00000082127 | NA            | NA |        | black        |
| ENSMUSG00000060730 | NA            | NA |        | turquoise    |

|                    |          |        |              |
|--------------------|----------|--------|--------------|
| ENSMUSG00000032563 | NA       | NA     | lightcyan    |
| ENSMUSG00000022051 | Bnip3l   | 12177  | green        |
| ENSMUSG00000032565 | Nudt16   | 75686  | brown        |
| ENSMUSG00000022052 | Ppp2r2a  | 71978  | blue         |
| ENSMUSG00000060733 | Ipmk     | 69718  | blue         |
| ENSMUSG00000060739 | Nsa2     | 59050  | black        |
| ENSMUSG00000050229 | Pigm     | 67556  | turquoise    |
| ENSMUSG00000108799 | NA       | NA     | greenyellow  |
| ENSMUSG00000078941 | Taf9     | 108143 | red          |
| ENSMUSG00000029802 | Abcg2    | 26357  | black        |
| ENSMUSG00000029804 | Herc3    | 73998  | yellow       |
| ENSMUSG00000015092 | Edf1     | 59022  | midnightblue |
| ENSMUSG00000053774 | Ubxn7    | 224111 | blue         |
| ENSMUSG00000026020 | Nop58    | 55989  | salmon       |
| ENSMUSG00000036534 | Slc38a7  | 234595 | yellow       |
| ENSMUSG00000026021 | Sumo1    | 22218  | red          |
| ENSMUSG00000043262 | Uevld    | 54122  | turquoise    |
| ENSMUSG00000015094 | Npdc1    | 18146  | purple       |
| ENSMUSG00000015095 | Fbxw5    | 30839  | turquoise    |
| ENSMUSG00000026024 | Als2     | 74018  | turquoise    |
| ENSMUSG00000021870 | Slmap    | 83997  | brown        |
| ENSMUSG00000021871 | Pnp      | 18950  | turquoise    |
| ENSMUSG00000026027 | Stradb   | 227154 | turquoise    |
| ENSMUSG00000026028 | Trak2    | 70827  | turquoise    |
| ENSMUSG00000004631 | Sgce     | 20392  | yellow       |
| ENSMUSG00000032803 | Cdv3     | 321022 | black        |
| ENSMUSG00000021877 | Arf4     | 11843  | green        |
| ENSMUSG00000004637 | Wwox     | 80707  | turquoise    |
| ENSMUSG00000089640 | NA       | NA     | turquoise    |
| ENSMUSG00000096370 | NA       | NA     | turquoise    |
| ENSMUSG00000000901 | Mmp11    | 17385  | yellow       |
| ENSMUSG00000000902 | Smarcb1  | 20587  | turquoise    |
| ENSMUSG00000089645 | Gm5766   | 436332 | tan          |
| ENSMUSG00000089646 | NA       | NA     | lightcyan    |
| ENSMUSG00000029570 | Lfng     | 16848  | purple       |
| ENSMUSG00000089648 | NA       | NA     | turquoise    |
| ENSMUSG00000029571 | Tmem106b | 71900  | turquoise    |
| ENSMUSG00000079137 | NA       | NA     | tan          |
| ENSMUSG00000079138 | NA       | NA     | turquoise    |
| ENSMUSG00000079139 | NA       | NA     | red          |
| ENSMUSG00000029575 | Mmab     | 77697  | turquoise    |
| ENSMUSG00000029577 | Ube3b    | 117146 | cyan         |
| ENSMUSG00000029578 | NA       | NA     | blue         |
| ENSMUSG00000082134 | NA       | NA     | brown        |
| ENSMUSG00000047238 | Mageh1   | 75625  | turquoise    |
| ENSMUSG00000101523 | NA       | NA     | turquoise    |
| ENSMUSG00000032570 | Atp2c1   | 235574 | turquoise    |
| ENSMUSG00000032571 | Pik3r4   | 75669  | blue         |
| ENSMUSG00000082136 | NA       | NA     | brown        |
| ENSMUSG00000008604 | Ubqln4   | 94232  | brown        |
| ENSMUSG00000032575 | Manf     | 74840  | blue         |
| ENSMUSG00000060743 | H3f3a    | 15078  | black        |
| ENSMUSG00000015335 | Zdhhc12  | 66220  | turquoise    |
| ENSMUSG00000022064 | Pibf1    | 52023  | turquoise    |

|                    |               |    |        |             |
|--------------------|---------------|----|--------|-------------|
| ENSMUSG00000015337 | Endog         |    | 13804  | turquoise   |
| ENSMUSG00000032579 | Hemk1         |    | 69536  | turquoise   |
| ENSMUSG00000085687 | NA            | NA |        | turquoise   |
| ENSMUSG00000018882 | Mrpl45        |    | 67036  | turquoise   |
| ENSMUSG00000029810 | Tmem176b      |    | 65963  | purple      |
| ENSMUSG00000096617 | NA            | NA |        | greenyellow |
| ENSMUSG00000008373 | Prpf31        |    | 68988  | red         |
| ENSMUSG00000019302 | Atp6v0a1      |    | 11975  | turquoise   |
| ENSMUSG00000029815 | NA            | NA |        | turquoise   |
| ENSMUSG00000019303 | NA            | NA |        | salmon      |
| ENSMUSG00000026031 | Cflar         |    | 12633  | turquoise   |
| ENSMUSG00000101299 | NA            | NA |        | yellow      |
| ENSMUSG00000081953 | NA            | NA |        | black       |
| ENSMUSG00000026032 | NA            | NA |        | brown       |
| ENSMUSG00000029817 | Tra2a         |    | 101214 | green       |
| ENSMUSG00000026034 | Clk1          |    | 12747  | turquoise   |
| ENSMUSG00000026035 | Ppil3         |    | 70225  | green       |
| ENSMUSG00000026036 | Nif3l1        |    | 65102  | blue        |
| ENSMUSG00000026037 | Orc2          |    | 18393  | brown       |
| ENSMUSG00000064719 | NA            | NA |        | grey60      |
| ENSMUSG00000026039 | Sgol2a        |    | 68549  | magenta     |
| ENSMUSG00000004642 | Slbp          |    | 20492  | red         |
| ENSMUSG00000021884 | Hacl1         |    | 56794  | turquoise   |
| ENSMUSG00000032812 | Arap1         |    | 69710  | turquoise   |
| ENSMUSG00000022300 | Dcaf13        |    | 223499 | green       |
| ENSMUSG00000032815 | Fanca         |    | 14087  | magenta     |
| ENSMUSG00000032816 | Igdcc4        |    | 56741  | brown       |
| ENSMUSG00000022305 | Lrp12         |    | 239393 | cyan        |
| ENSMUSG00000022306 | Zfpm2         |    | 22762  | turquoise   |
| ENSMUSG00000022307 | Oxr1          |    | 170719 | yellow      |
| ENSMUSG00000000915 | NA            | NA |        | turquoise   |
| ENSMUSG00000079144 | A130010J15Rik |    | 319266 | turquoise   |
| ENSMUSG00000000916 | Nsun5         |    | 100609 | blue        |
| ENSMUSG00000029580 | Actb          |    | 11461  | green       |
| ENSMUSG00000029581 | Fscn1         |    | 14086  | black       |
| ENSMUSG00000105263 | NA            | NA |        | grey60      |
| ENSMUSG00000105265 | Sox2ot        |    | 320478 | brown       |
| ENSMUSG00000074994 | Qser1         |    | 99003  | black       |
| ENSMUSG00000029587 | Zfp12         |    | 231866 | turquoise   |
| ENSMUSG00000047242 | Taf9b         |    | 407786 | turquoise   |
| ENSMUSG00000082140 | NA            | NA |        | lightcyan   |
| ENSMUSG00000047246 | Hist1h2be     |    | 319179 | brown       |
| ENSMUSG00000075415 | Fnbp1         |    | 14269  | yellow      |
| ENSMUSG00000085928 | 4933427I22Rik |    | 71235  | turquoise   |
| ENSMUSG00000047248 | C2cd3         |    | 277939 | turquoise   |
| ENSMUSG00000082145 | NA            | NA |        | turquoise   |
| ENSMUSG00000032580 | Rbm5          |    | 83486  | blue        |
| ENSMUSG00000032582 | Rbm6          |    | 19654  | red         |
| ENSMUSG00000015341 | Golga7        |    | 57437  | brown       |
| ENSMUSG00000025854 | Fam20c        |    | 80752  | yellow      |
| ENSMUSG00000075419 | Dolk          |    | 227697 | yellow      |
| ENSMUSG00000032583 | Mon1a         |    | 72825  | turquoise   |
| ENSMUSG00000022070 | Bora          |    | 77744  | magenta     |
| ENSMUSG00000043510 | Hscb          |    | 100900 | turquoise   |



|                     |               |           |           |
|---------------------|---------------|-----------|-----------|
| ENSMUSG00000025856  | NA            | NA        | turquoise |
| ENSMUSG00000050240  | Hic2          | 58180     | turquoise |
| ENSMUSG00000025857  | Dnaaf5        | 433956    | brown     |
| ENSMUSG00000032586  | Traip         | 22036     | magenta   |
| ENSMUSG00000025858  | Get4          | 67604     | turquoise |
| ENSMUSG00000050243  | NA            | NA        | salmon    |
| ENSMUSG00000022075  | Rhobtb2       | 246710    | turquoise |
| ENSMUSG00000050244  | Heatr1        | 217995    | green     |
| ENSMUSG00000032589  | Bsn           | 12217     | turquoise |
| ENSMUSG00000033004  | Mycbp2        | 105689    | turquoise |
| ENSMUSG00000050248  | Evc2          | 68525     | turquoise |
| ENSMUSG00000033009  | Ogfod1        | 270086    | turquoise |
| ENSMUSG00000001100  | Poldip2       | 67811     | green     |
| ENSMUSG00000000686  | Abhd15        | 67477     | brown     |
| ENSMUSG00000001105  | Ift20         | 55978     | turquoise |
| ENSMUSG00000078965  | NA            | NA        | brown     |
| ENSMUSG00000078967  | NA            | NA        | turquoise |
| ENSMUSG00000068457  | Uty           | 22290     | blue      |
| ENSMUSG00000029821  | Dfna5         | 54722     | cyan      |
| ENSMUSG00000036550  | Cnot1         | 234594    | blue      |
| ENSMUSG00000029823  | Luc7l2        | 192196    | turquoise |
| ENSMUSG00000036552  | Ermard        | 381062    | yellow    |
| ENSMUSG000000105506 | NA            | NA        | turquoise |
| ENSMUSG00000008384  | Sertad1       | 55942     | blue      |
| ENSMUSG00000018899  | Irf1          | 16362     | turquoise |
| ENSMUSG000000086119 | NA            | NA        | turquoise |
| ENSMUSG00000029826  | Zc3hav1       | 78781     | turquoise |
| ENSMUSG00000071451  | Psmg4         | 69666     | red       |
| ENSMUSG00000026042  | Col5a2        | 12832     | blue      |
| ENSMUSG00000036555  | Iqce          | 74239     | turquoise |
| ENSMUSG00000043284  | Tmem11        | 216821    | lightcyan |
| ENSMUSG00000053799  | Exoc6         | 107371    | blue      |
| ENSMUSG00000071454  | Dtnb          | 13528     | blue      |
| ENSMUSG00000081967  | NA            | NA        | turquoise |
| ENSMUSG00000021890  | Eaf1          | 74427     | blue      |
| ENSMUSG00000071456  | 1110002L01Rik | 100043040 | blue      |
| ENSMUSG00000021891  | NA            | NA        | grey60    |
| ENSMUSG00000026047  | Kdelc1        | 72050     | blue      |
| ENSMUSG00000026048  | Ercc5         | 22592     | blue      |
| ENSMUSG00000021893  | Capn7         | 12339     | turquoise |
| ENSMUSG00000026049  | Tex30         | 75623     | magenta   |
| ENSMUSG00000021895  | Arhgef3       | 71704     | cyan      |
| ENSMUSG00000011382  | Dhdh          | 71755     | turquoise |
| ENSMUSG00000022312  | Eif3h         | 68135     | black     |
| ENSMUSG00000022313  | Utp23         | 78581     | turquoise |
| ENSMUSG00000032826  | Ank2          | 109676    | grey60    |
| ENSMUSG00000022314  | Rad21         | 19357     | red       |
| ENSMUSG00000032827  | Ppp1r9a       | 243725    | turquoise |
| ENSMUSG00000089662  | NA            | NA        | yellow    |
| ENSMUSG00000105270  | NA            | NA        | pink      |
| ENSMUSG00000105272  | NA            | NA        | yellow    |
| ENSMUSG00000029591  | Ung           | 22256     | salmon    |
| ENSMUSG00000029592  | Gm16108       | 102637926 | yellow    |
| ENSMUSG00000019080  | Mfsd3         | 69572     | brown     |

|                    |          |           |           |
|--------------------|----------|-----------|-----------|
| ENSMUSG00000057762 | NA       | NA        | turquoise |
| ENSMUSG00000029594 | Rbm19    | 74111     | brown     |
| ENSMUSG00000019082 | Slc25a22 | 68267     | blue      |
| ENSMUSG00000047250 | Ptgs1    | 19224     | turquoise |
| ENSMUSG00000064493 | Snora28  | 100316932 | turquoise |
| ENSMUSG00000057766 | Ankrd29  | 225187    | yellow    |
| ENSMUSG00000029598 | Plbd2    | 71772     | turquoise |
| ENSMUSG00000029599 | Ddx54    | 71990     | blue      |
| ENSMUSG00000019087 | Atp6ap1  | 54411     | yellow    |
| ENSMUSG00000025860 | Xiap     | 11798     | blue      |
| ENSMUSG00000085939 | NA       | NA        | red       |
| ENSMUSG00000032590 | Apeh     | 235606    | turquoise |
| ENSMUSG00000025862 | Stag2    | 20843     | blue      |
| ENSMUSG00000032594 | Ip6k1    | 27399     | turquoise |
| ENSMUSG00000025867 | Cplx2    | 12890     | green     |
| ENSMUSG00000025868 | Higd2a   | 67044     | yellow    |
| ENSMUSG00000025869 | Nop16    | 28126     | red       |
| ENSMUSG00000032598 | Nckipsd  | 80987     | yellow    |
| ENSMUSG00000015357 | Clpx     | 270166    | green     |
| ENSMUSG00000032599 | Ip6k2    | 76500     | turquoise |
| ENSMUSG00000033014 | Trim33   | 94093     | turquoise |
| ENSMUSG00000033016 | Nfatc1   | 18018     | turquoise |
| ENSMUSG00000022089 | Bin3     | 57784     | green     |
| ENSMUSG00000000693 | Loxl3    | 16950     | turquoise |
| ENSMUSG00000078970 | NA       | NA        | brown     |
| ENSMUSG00000078974 | Sec61g   | 20335     | blue      |
| ENSMUSG00000068466 | NA       | NA        | red       |
| ENSMUSG00000089906 | NA       | NA        | turquoise |
| ENSMUSG00000086123 | NA       | NA        | blue      |
| ENSMUSG00000036560 | Lgi4     | 243914    | brown     |
| ENSMUSG00000019320 | Noxo1    | 71893     | turquoise |
| ENSMUSG00000008393 | Carhsp1  | 52502     | purple    |
| ENSMUSG00000036561 | Ppp6r2   | 71474     | turquoise |
| ENSMUSG00000029833 | NA       | NA        | grey60    |
| ENSMUSG00000036564 | Ndrp4    | 234593    | yellow    |
| ENSMUSG00000029836 | Cbx3     | 12417     | red       |
| ENSMUSG00000081973 | NA       | NA        | brown     |
| ENSMUSG00000081974 | NA       | NA        | turquoise |
| ENSMUSG00000036565 | Ttyh3    | 78339     | yellow    |
| ENSMUSG00000029838 | NA       | NA        | red       |
| ENSMUSG00000081975 | NA       | NA        | blue      |
| ENSMUSG00000043295 | NA       | NA        | turquoise |
| ENSMUSG00000036568 | Gltscr1l | 210982    | blue      |
| ENSMUSG00000054226 | Tprkb    | 69786     | purple    |
| ENSMUSG00000092909 | NA       | NA        | yellow    |
| ENSMUSG00000022321 | Cdh10    | 320873    | yellow    |
| ENSMUSG00000032834 | Pwp2     | 110816    | green     |
| ENSMUSG00000022322 | Shcbp1   | 20419     | magenta   |
| ENSMUSG00000004667 | Polr2e   | 66420     | black     |
| ENSMUSG00000022323 | Hrsp12   | 15473     | turquoise |
| ENSMUSG00000022325 | Pop1     | 67724     | lightcyan |
| ENSMUSG00000032839 | Trpc1    | 22063     | turquoise |
| ENSMUSG00000089670 | NA       | NA        | yellow    |
| ENSMUSG00000022329 | Stk3     | 56274     | turquoise |

|                    |               |    |        |              |
|--------------------|---------------|----|--------|--------------|
| ENSMUSG0000000934  | Top1mt        |    | 72960  | turquoise    |
| ENSMUSG00000105280 | NA            | NA |        | pink         |
| ENSMUSG00000047260 | Emc6          |    | 66048  | turquoise    |
| ENSMUSG00000047264 | Zfp358        |    | 140482 | turquoise    |
| ENSMUSG00000082160 | NA            | NA |        | yellow       |
| ENSMUSG00000057778 | Cyb5d2        |    | 192986 | turquoise    |
| ENSMUSG00000068706 | NA            | NA |        | brown        |
| ENSMUSG00000025870 | Arl10         |    | 56795  | turquoise    |
| ENSMUSG00000082163 | NA            | NA |        | red          |
| ENSMUSG00000025871 | 4833439L19Rik |    | 97820  | midnightblue |
| ENSMUSG00000082164 | NA            | NA |        | grey60       |
| ENSMUSG00000025872 | Thoc3         |    | 73666  | blue         |
| ENSMUSG00000082165 | NA            | NA |        | pink         |
| ENSMUSG00000025873 | Faf2          |    | 76577  | brown        |
| ENSMUSG00000060771 | Tsga10        |    | 211484 | turquoise    |
| ENSMUSG00000015363 | Trabd         |    | 67976  | turquoise    |
| ENSMUSG00000022091 | Sorbs3        |    | 20410  | greenyellow  |
| ENSMUSG00000022092 | Ppp3cc        |    | 19057  | turquoise    |
| ENSMUSG00000033020 | Polr2f        |    | 69833  | black        |
| ENSMUSG00000025878 | Uimc1         |    | 20184  | turquoise    |
| ENSMUSG00000022094 | Slc39a14      |    | 213053 | brown        |
| ENSMUSG00000033021 | Gmppa         |    | 69080  | brown        |
| ENSMUSG00000033022 | Cdo1          |    | 12583  | turquoise    |
| ENSMUSG00000022095 | Fam160b2      |    | 239170 | turquoise    |
| ENSMUSG00000043535 | Setx          |    | 269254 | turquoise    |
| ENSMUSG00000022096 | Hr            |    | 15460  | turquoise    |
| ENSMUSG00000022098 | Bmp1          |    | 12153  | turquoise    |
| ENSMUSG00000004902 | Slc25a18      |    | 71803  | grey60       |
| ENSMUSG00000071708 | Sms           |    | 20603  | red          |
| ENSMUSG00000001120 | Pcbp3         |    | 59093  | green        |
| ENSMUSG00000001127 | Araf          |    | 11836  | turquoise    |
| ENSMUSG00000089911 | Hiat1         |    | 15247  | turquoise    |
| ENSMUSG00000001128 | Cfp           |    | 18636  | turquoise    |
| ENSMUSG00000089917 | Uckl1         |    | 68556  | turquoise    |
| ENSMUSG00000029840 | Mtpn          |    | 14489  | midnightblue |
| ENSMUSG00000096647 | NA            | NA |        | yellow       |
| ENSMUSG00000068479 | Mfap1a        |    | 67532  | turquoise    |
| ENSMUSG00000036572 | Upf3b         |    | 68134  | brown        |
| ENSMUSG00000026064 | Ptp4a1        |    | 19243  | red          |
| ENSMUSG00000019338 | Zfp687        |    | 78266  | turquoise    |
| ENSMUSG00000047509 | NA            | NA |        | blue         |
| ENSMUSG00000054237 | Fra10ac1      |    | 70567  | brown        |
| ENSMUSG00000032840 | NA            | NA |        | turquoise    |
| ENSMUSG00000032842 | Abcc10        |    | 224814 | brown        |
| ENSMUSG00000022332 | Khdrbs3       |    | 13992  | pink         |
| ENSMUSG00000004677 | Myo9b         |    | 17925  | blue         |
| ENSMUSG00000015605 | Srf           |    | 20807  | green        |
| ENSMUSG00000032846 | Zswim6        |    | 67263  | turquoise    |
| ENSMUSG00000022335 | Zfat          |    | 380993 | turquoise    |
| ENSMUSG00000022336 | Eif3e         |    | 16341  | blue         |
| ENSMUSG00000022337 | Emc2          |    | 66736  | turquoise    |
| ENSMUSG00000050505 | Pcdh20        |    | 219257 | yellow       |
| ENSMUSG00000022338 | Eny2          |    | 223527 | red          |
| ENSMUSG00000089682 | Bcl2l2        |    | 12050  | turquoise    |

|                    |              |        |             |
|--------------------|--------------|--------|-------------|
| ENSMUSG00000022339 | Ebag9        | 55960  | red         |
| ENSMUSG00000079179 | Rab10os      | 74173  | yellow      |
| ENSMUSG00000057788 | Ddx49        | 234374 | black       |
| ENSMUSG00000057789 | Bak1         | 12018  | cyan        |
| ENSMUSG00000036810 | Cnep1r1      | 382030 | blue        |
| ENSMUSG00000101567 | NA           | NA     | turquoise   |
| ENSMUSG00000082179 | NA           | NA     | turquoise   |
| ENSMUSG00000043542 | Zc2hc1a      | 67306  | blue        |
| ENSMUSG00000036815 | Dpp10        | 269109 | turquoise   |
| ENSMUSG00000033031 | C330027C09Ri | 224171 | magenta     |
| ENSMUSG00000015377 | Dennd6b      | 69440  | turquoise   |
| ENSMUSG00000036817 | Sun1         | 77053  | turquoise   |
| ENSMUSG00000026305 | Lrrfp1       | 16978  | red         |
| ENSMUSG00000036819 | Jmjd4        | 194952 | turquoise   |
| ENSMUSG00000026307 | Scly         | 50880  | yellow      |
| ENSMUSG00000033036 | NA           | NA     | brown       |
| ENSMUSG00000026309 | Ilkap        | 67444  | blue        |
| ENSMUSG00000061207 | Stk19        | 54402  | brown       |
| ENSMUSG00000001134 | Uxt          | 22294  | blue        |
| ENSMUSG00000068480 | NA           | NA     | turquoise   |
| ENSMUSG00000078994 | Zfp429       | 72807  | turquoise   |
| ENSMUSG00000001138 | Cnm3         | 94218  | turquoise   |
| ENSMUSG00000068487 | NA           | NA     | turquoise   |
| ENSMUSG00000036580 | Spg20        | 229285 | blue        |
| ENSMUSG00000079418 | Atg4a        | 666468 | turquoise   |
| ENSMUSG00000105536 | NA           | NA     | brown       |
| ENSMUSG00000081992 | NA           | NA     | blue        |
| ENSMUSG00000036585 | Fgf1         | 14164  | greenyellow |
| ENSMUSG00000037001 | Zfp39        | 22698  | turquoise   |
| ENSMUSG00000047514 | Tspyl1       | 22110  | green       |
| ENSMUSG00000026074 | Map4k4       | 26921  | green       |
| ENSMUSG00000081996 | NA           | NA     | brown       |
| ENSMUSG00000081999 | NA           | NA     | red         |
| ENSMUSG00000026078 | NA           | NA     | green       |
| ENSMUSG00000037007 | Zfp113       | 56314  | turquoise   |
| ENSMUSG00000022340 | Sybu         | 319613 | turquoise   |
| ENSMUSG00000032855 | Pkd1         | 18763  | turquoise   |
| ENSMUSG00000005102 | Eif2ak4      | 27103  | yellow      |
| ENSMUSG00000005103 | Wdr1         | 22388  | green       |
| ENSMUSG00000040003 | Magi2        | 50791  | pink        |
| ENSMUSG00000089695 | NA           | NA     | greenyellow |
| ENSMUSG00000040006 | Ginm1        | 215751 | turquoise   |
| ENSMUSG00000040007 | Bahd1        | 228536 | brown       |
| ENSMUSG00000079184 | Mphosph8     | 75339  | red         |
| ENSMUSG00000089698 | NA           | NA     | lightcyan   |
| ENSMUSG00000000957 | Mmp14        | 17387  | turquoise   |
| ENSMUSG00000040009 | Gnaz         | 14687  | turquoise   |
| ENSMUSG00000000959 | Oxa1l        | 69089  | green       |
| ENSMUSG00000085962 | NA           | NA     | yellow      |
| ENSMUSG00000047284 | Neurl4       | 216860 | blue        |
| ENSMUSG00000082185 | NA           | NA     | blue        |
| ENSMUSG00000036820 | Amdhd2       | 245847 | blue        |
| ENSMUSG00000025893 | Kbtbd3       | 69149  | brown       |
| ENSMUSG00000082186 | NA           | NA     | turquoise   |

|                    |               |           |             |
|--------------------|---------------|-----------|-------------|
| ENSMUSG00000025894 | Aasdhppt      | 67618     | red         |
| ENSMUSG00000036822 | Topors        | 106021    | green       |
| ENSMUSG00000082189 | NA            | NA        | tan         |
| ENSMUSG00000026311 | NA            | NA        | blue        |
| ENSMUSG00000025898 | Cwf19I2       | 244672    | turquoise   |
| ENSMUSG00000025899 | Alkbh8        | 67667     | cyan        |
| ENSMUSG00000026313 | Hdac4         | 208727    | brown       |
| ENSMUSG00000060795 | NA            | NA        | blue        |
| ENSMUSG00000071723 | Gspt2         | 14853     | yellow      |
| ENSMUSG00000043557 | Mdga1         | 74762     | turquoise   |
| ENSMUSG00000060798 | Intu          | 380614    | brown       |
| ENSMUSG00000026317 | Cln8          | 26889     | brown       |
| ENSMUSG00000033047 | Eif3l         | 223691    | green       |
| ENSMUSG00000050288 | Fzd2          | 57265     | black       |
| ENSMUSG00000026319 | 2310035C23Rik | 227446    | turquoise   |
| ENSMUSG00000001143 | Lman2l        | 214895    | turquoise   |
| ENSMUSG00000004929 | Thop1         | 50492     | red         |
| ENSMUSG00000011658 | Fuz           | 70300     | turquoise   |
| ENSMUSG00000089931 | NA            | NA        | pink        |
| ENSMUSG00000029860 | Zyx           | 22793     | green       |
| ENSMUSG00000079426 | Arpc4         | 68089     | green       |
| ENSMUSG00000079427 | Mthfsl        | 100039707 | blue        |
| ENSMUSG00000086155 | 9430041J12Rik | 77323     | black       |
| ENSMUSG00000029863 | Casp2         | 12366     | green       |
| ENSMUSG00000036591 | Arhgap21      | 71435     | turquoise   |
| ENSMUSG00000029864 | Gstk1         | 76263     | turquoise   |
| ENSMUSG00000079429 | Mroh2a        | 100040766 | cyan        |
| ENSMUSG00000086158 | Ccpg1os       | 546143    | turquoise   |
| ENSMUSG00000026080 | Chst10        | 98388     | purple      |
| ENSMUSG00000105549 | NA            | NA        | turquoise   |
| ENSMUSG00000026082 | Rev1          | 56210     | green       |
| ENSMUSG00000026083 | Eif5b         | 226982    | green       |
| ENSMUSG00000037010 | Apln          | 30878     | yellow      |
| ENSMUSG00000029869 | Ephb6         | 13848     | turquoise   |
| ENSMUSG00000082420 | NA            | NA        | turquoise   |
| ENSMUSG00000054252 | Fgfr3         | 14184     | green       |
| ENSMUSG00000037012 | Hk1           | 15275     | green       |
| ENSMUSG00000037013 | Ss18          | 268996    | blue        |
| ENSMUSG00000036599 | NA            | NA        | turquoise   |
| ENSMUSG00000026087 | Mrpl30        | 107734    | green       |
| ENSMUSG00000071497 | Nutf2-ps1     | 100043462 | red         |
| ENSMUSG00000026088 | Mitd1         | 69028     | turquoise   |
| ENSMUSG00000082424 | NA            | NA        | greenyellow |
| ENSMUSG00000054256 | Msi1          | 17690     | green       |
| ENSMUSG00000101814 | NA            | NA        | tan         |
| ENSMUSG00000037017 | Zscan21       | 22697     | blue        |
| ENSMUSG00000022350 | E430025E21Rik | 223593    | green       |
| ENSMUSG00000022351 | Sqle          | 20775     | turquoise   |
| ENSMUSG00000082429 | NA            | NA        | cyan        |
| ENSMUSG00000022353 | Mtss1         | 211401    | turquoise   |
| ENSMUSG00000004698 | Hdac9         | 79221     | red         |
| ENSMUSG00000022354 | Ndufb9        | 66218     | yellow      |
| ENSMUSG00000032867 | Fbxw8         | 231672    | turquoise   |
| ENSMUSG00000040010 | Slc7a5        | 20539     | blue        |

|                     |             |        |              |
|---------------------|-------------|--------|--------------|
| ENSMUSG00000032869  | Psmf1       | 228769 | red          |
| ENSMUSG00000022358  | Fbxo32      | 67731  | turquoise    |
| ENSMUSG00000022359  | Wdyhv1      | 76773  | turquoise    |
| ENSMUSG00000040018  | Cox15       | 226139 | blue         |
| ENSMUSG00000079197  | Psme2       | 19188  | turquoise    |
| ENSMUSG00000068732  | Tmem167b    | 67495  | blue         |
| ENSMUSG00000068735  | Trp53i11    | 277414 | cyan         |
| ENSMUSG00000082192  | NA          | NA     | black        |
| ENSMUSG00000075465  | NA          | NA     | blue         |
| ENSMUSG00000068739  | Sars        | 20226  | green        |
| ENSMUSG00000075467  | Dnlz        | 52838  | blue         |
| ENSMUSG00000082195  | NA          | NA     | cyan         |
| ENSMUSG00000093124  | NA          | NA     | yellow       |
| ENSMUSG00000082197  | NA          | NA     | turquoise    |
| ENSMUSG00000036833  | Pnpla7      | 241274 | purple       |
| ENSMUSG00000036834  | Plch1       | 269437 | magenta      |
| ENSMUSG00000036835  | Psenen      | 66340  | turquoise    |
| ENSMUSG00000008668  | Rps18       | 20084  | black        |
| ENSMUSG00000033054  | Npat        | 244879 | salmon       |
| ENSMUSG00000033055  | Ankrd54     | 223690 | blue         |
| ENSMUSG00000004931  | Apba3       | 57267  | yellow       |
| ENSMUSG00000050299  | NA          | NA     | black        |
| ENSMUSG00000004934  | NA          | NA     | brown        |
| ENSMUSG00000033059  | Pygb        | 110078 | red          |
| ENSMUSG00000001150  | Mcm3ap      | 54387  | green        |
| ENSMUSG00000004936  | Map2k1      | 26395  | turquoise    |
| ENSMUSG00000004937  | Sgta        | 52551  | brown        |
| ENSMUSG000000089940 | NA          | NA     | yellow       |
| ENSMUSG00000001156  | Mxd1        | 17119  | yellow       |
| ENSMUSG00000001157  | Gmcl1       | 23885  | blue         |
| ENSMUSG00000001158  | Snrnp27     | 66618  | green        |
| ENSMUSG00000079435  | Rpl36a      | 19982  | black        |
| ENSMUSG00000105556  | NA          | NA     | turquoise    |
| ENSMUSG00000019362  | D8Erttd738e | 101966 | midnightblue |
| ENSMUSG00000105558  | NA          | NA     | greenyellow  |
| ENSMUSG00000075700  | Selt        | 69227  | turquoise    |
| ENSMUSG00000075701  | Vimp        | 109815 | blue         |
| ENSMUSG00000037020  | Wdr62       | 233064 | brown        |
| ENSMUSG00000047534  | Mis18bp1    | 217653 | magenta      |
| ENSMUSG00000075702  | Selm        | 114679 | turquoise    |
| ENSMUSG00000026094  | Stk17b      | 98267  | turquoise    |
| ENSMUSG00000054263  | Lifr        | 16880  | purple       |
| ENSMUSG00000037022  | Mmaa        | 109136 | turquoise    |
| ENSMUSG00000026095  | Asnsd1      | 70396  | blue         |
| ENSMUSG00000075703  | Ept1        | 28042  | blue         |
| ENSMUSG00000082431  | NA          | NA     | black        |
| ENSMUSG00000075704  | Txnrd2      | 26462  | turquoise    |
| ENSMUSG00000026096  | Osgepl1     | 72085  | turquoise    |
| ENSMUSG00000082432  | NA          | NA     | turquoise    |
| ENSMUSG00000075705  | Msrbl       | 27361  | turquoise    |
| ENSMUSG00000064778  | NA          | NA     | turquoise    |
| ENSMUSG00000026097  | Ormdl1      | 227102 | brown        |
| ENSMUSG00000075706  | Gpx4        | 625249 | yellow       |
| ENSMUSG00000026098  | Pms1        | 227099 | salmon       |

|                    |               |        |              |
|--------------------|---------------|--------|--------------|
| ENSMUSG00000032870 | Smap2         | 69780  | yellow       |
| ENSMUSG00000047539 | Fbxo28        | 67948  | blue         |
| ENSMUSG00000032872 | Cyb5r4        | 266690 | blue         |
| ENSMUSG00000022360 | Atad2         | 70472  | magenta      |
| ENSMUSG00000037029 | Zfp146        | 26465  | lightcyan    |
| ENSMUSG00000043801 | NA            | NA     | black        |
| ENSMUSG00000022361 | Zhx1          | 22770  | blue         |
| ENSMUSG00000022362 | NA            | NA     | turquoise    |
| ENSMUSG00000032875 | Arhgef17      | 207212 | greenyellow  |
| ENSMUSG00000050530 | Fam171a1      | 269233 | yellow       |
| ENSMUSG00000022364 | Tbc1d31       | 210544 | magenta      |
| ENSMUSG00000022365 | Derl1         | 67819  | turquoise    |
| ENSMUSG00000050533 | NA            | NA     | pink         |
| ENSMUSG00000040021 | Lats1         | 16798  | brown        |
| ENSMUSG00000040022 | Rab11fip2     | 74998  | yellow       |
| ENSMUSG00000022369 | Mtbp          | 105837 | cyan         |
| ENSMUSG00000040025 | Ythdf2        | 213541 | red          |
| ENSMUSG00000000976 | Heatr6        | 217026 | turquoise    |
| ENSMUSG00000040028 | Elavl1        | 15568  | black        |
| ENSMUSG00000040029 | Ipo8          | 320727 | turquoise    |
| ENSMUSG00000068740 | Celsr2        | 53883  | turquoise    |
| ENSMUSG00000085982 | 9530051G07Rik | 319781 | pink         |
| ENSMUSG00000096910 | NA            | NA     | turquoise    |
| ENSMUSG00000075470 | Alg10b        | 380959 | turquoise    |
| ENSMUSG00000068742 | Cry2          | 12953  | greenyellow  |
| ENSMUSG00000058230 | Arhgap35      | 232906 | turquoise    |
| ENSMUSG00000068744 | Psrc1         | 56742  | magenta      |
| ENSMUSG00000068747 | Sort1         | 20661  | turquoise    |
| ENSMUSG00000068748 | Ptpnz1        | 19283  | turquoise    |
| ENSMUSG00000068749 | Psma5         | 26442  | blue         |
| ENSMUSG00000075478 | Slitrk1       | 76965  | brown        |
| ENSMUSG00000036840 | Siah1a        | 20437  | blue         |
| ENSMUSG00000058239 | NA            | NA     | turquoise    |
| ENSMUSG00000101599 | NA            | NA     | greenyellow  |
| ENSMUSG00000036845 | Lin37         | 75660  | blue         |
| ENSMUSG00000026335 | Pam           | 18484  | yellow       |
| ENSMUSG00000061232 | H2-K1         | 14972  | turquoise    |
| ENSMUSG00000033065 | Pfkm          | 18642  | purple       |
| ENSMUSG00000071748 | NA            | NA     | turquoise    |
| ENSMUSG00000026339 | Ccdc93        | 70829  | turquoise    |
| ENSMUSG00000033068 | Entpd6        | 12497  | turquoise    |
| ENSMUSG00000054509 | Parp4         | 328417 | turquoise    |
| ENSMUSG00000004945 | Tmem242       | 70544  | midnightblue |
| ENSMUSG00000022601 | Zbtb11        | 271377 | turquoise    |
| ENSMUSG00000004947 | Dtx2          | 74198  | green        |
| ENSMUSG00000022604 | Cep97         | 74201  | blue         |
| ENSMUSG00000022607 | Ptk2          | 14083  | yellow       |
| ENSMUSG00000079442 | St6galnac4    | 20448  | turquoise    |
| ENSMUSG00000105561 | NA            | NA     | brown        |
| ENSMUSG00000089958 | NA            | NA     | blue         |
| ENSMUSG00000086174 | NA            | NA     | turquoise    |
| ENSMUSG00000096687 | NA            | NA     | turquoise    |
| ENSMUSG00000019370 | Calm3         | 12315  | yellow       |
| ENSMUSG00000019373 | Cops3         | 26572  | blue         |

|                    |          |        |             |
|--------------------|----------|--------|-------------|
| ENSMUSG00000037031 | Tspan15  | 70423  | blue        |
| ENSMUSG00000065200 | NA       | NA     | turquoise   |
| ENSMUSG00000037032 | Apbb1    | 11785  | turquoise   |
| ENSMUSG00000047547 | Cltb     | 74325  | blue        |
| ENSMUSG00000037035 | Inhbb    | 16324  | turquoise   |
| ENSMUSG00000054277 | Arfgap3  | 66251  | green       |
| ENSMUSG00000101834 | NA       | NA     | turquoise   |
| ENSMUSG00000022370 | NA       | NA     | turquoise   |
| ENSMUSG00000032883 | Acsl3    | 74205  | purple      |
| ENSMUSG00000015647 | Lama5    | 16776  | turquoise   |
| ENSMUSG00000032889 | NA       | NA     | turquoise   |
| ENSMUSG00000022377 | Asap1    | 13196  | turquoise   |
| ENSMUSG00000022378 | Fam49b   | 223601 | blue        |
| ENSMUSG00000040033 | Stat2    | 20847  | turquoise   |
| ENSMUSG00000033306 | Lpp      | 210126 | purple      |
| ENSMUSG00000040034 | Nup43    | 69912  | magenta     |
| ENSMUSG00000033307 | Mif      | 17319  | tan         |
| ENSMUSG00000033308 | Dpyd     | 99586  | turquoise   |
| ENSMUSG00000040037 | Negr1    | 320840 | turquoise   |
| ENSMUSG00000001403 | Ube2c    | 68612  | magenta     |
| ENSMUSG00000058240 | Cryzl1   | 66609  | turquoise   |
| ENSMUSG00000096926 | NA       | NA     | turquoise   |
| ENSMUSG00000075486 | Commd6   | 66200  | brown       |
| ENSMUSG00000008682 | Rpl10    | 110954 | black       |
| ENSMUSG00000105804 | NA       | NA     | pink        |
| ENSMUSG00000036850 | NA       | NA     | blue        |
| ENSMUSG00000105805 | NA       | NA     | brown       |
| ENSMUSG00000008683 | Rps15a   | 267019 | black       |
| ENSMUSG00000026341 | Actr3    | 74117  | green       |
| ENSMUSG00000036854 | Hspb6    | 243912 | yellow      |
| ENSMUSG00000026342 | Slc35f5  | 74150  | turquoise   |
| ENSMUSG00000093149 | NA       | NA     | turquoise   |
| ENSMUSG00000061242 | NA       | NA     | turquoise   |
| ENSMUSG00000054514 | Atad3aos | 70448  | turquoise   |
| ENSMUSG00000033075 | Senp1    | 223870 | red         |
| ENSMUSG00000071757 | Zhx2     | 387609 | green       |
| ENSMUSG00000061244 | Exoc5    | 105504 | blue        |
| ENSMUSG00000026349 | NA       | NA     | brown       |
| ENSMUSG00000054519 | Zfp867   | 237775 | turquoise   |
| ENSMUSG00000022610 | Mapk12   | 29857  | turquoise   |
| ENSMUSG00000001173 | Ocrl     | 320634 | turquoise   |
| ENSMUSG00000022614 | Lmf2     | 105847 | turquoise   |
| ENSMUSG00000022615 | Tymp     | 72962  | turquoise   |
| ENSMUSG00000001175 | Calm1    | 12313  | turquoise   |
| ENSMUSG00000022617 | Chkb     | 12651  | turquoise   |
| ENSMUSG00000079450 | Cldn34c1 | 73061  | green       |
| ENSMUSG00000096696 | Zfp960   | 449000 | brown       |
| ENSMUSG00000096699 | NA       | NA     | pink        |
| ENSMUSG00000054280 | Prr14l   | 215476 | blue        |
| ENSMUSG00000097119 | NA       | NA     | turquoise   |
| ENSMUSG00000047554 | Tmem41b  | 233724 | yellow      |
| ENSMUSG00000101841 | NA       | NA     | green       |
| ENSMUSG00000082453 | NA       | NA     | turquoise   |
| ENSMUSG00000047557 | Lxn      | 17035  | greenyellow |



|                    |               |        |              |
|--------------------|---------------|--------|--------------|
| ENSMUSG00000082454 | NA            | NA     | green        |
| ENSMUSG00000082455 | NA            | NA     | yellow       |
| ENSMUSG00000082456 | NA            | NA     | tan          |
| ENSMUSG00000037049 | Smpd1         | 20597  | purple       |
| ENSMUSG00000022382 | Wnt7b         | 22422  | turquoise    |
| ENSMUSG00000050550 | NA            | NA     | blue         |
| ENSMUSG00000005142 | Man2b1        | 17159  | yellow       |
| ENSMUSG00000015656 | Hspa8         | 15481  | green        |
| ENSMUSG00000032897 | Nfyc          | 18046  | red          |
| ENSMUSG00000050552 | Lamtor4       | 66096  | turquoise    |
| ENSMUSG00000022385 | Gtse1         | 29870  | magenta      |
| ENSMUSG00000040040 | Ift88         | 21821  | turquoise    |
| ENSMUSG00000032898 | Fbxo21        | 231670 | blue         |
| ENSMUSG00000022386 | Trmu          | 72026  | turquoise    |
| ENSMUSG00000015659 | Serac1        | 321007 | turquoise    |
| ENSMUSG00000022387 | Brd1          | 223770 | turquoise    |
| ENSMUSG00000050555 | Hyls1         | 76832  | magenta      |
| ENSMUSG00000040043 | Rbms2         | 56516  | turquoise    |
| ENSMUSG00000022389 | Tef           | 21685  | yellow       |
| ENSMUSG00000040044 | NA            | NA     | blue         |
| ENSMUSG00000033319 | NA            | NA     | blue         |
| ENSMUSG00000040048 | Ndufb10       | 68342  | turquoise    |
| ENSMUSG00000001415 | Smg5          | 229512 | blue         |
| ENSMUSG00000001416 | Cct3          | 12462  | green        |
| ENSMUSG00000001418 | NA            | NA     | blue         |
| ENSMUSG00000001419 | Mef2d         | 17261  | green        |
| ENSMUSG00000058254 | Tspan7        | 21912  | purple       |
| ENSMUSG00000008690 | Ncaph2        | 52683  | red          |
| ENSMUSG00000093152 | NA            | NA     | brown        |
| ENSMUSG00000036860 | Mrpl55        | 67212  | blue         |
| ENSMUSG00000105814 | Mir703        | 735265 | red          |
| ENSMUSG00000058258 | Idi1          | 319554 | turquoise    |
| ENSMUSG00000036862 | Dchs1         | 233651 | turquoise    |
| ENSMUSG00000036864 | Proser3       | 333193 | turquoise    |
| ENSMUSG00000086429 | Gt(ROSA)26So  | 14910  | turquoise    |
| ENSMUSG00000009112 | Bcl2l13       | 94044  | green        |
| ENSMUSG00000026353 | Ubxn4         | 67812  | turquoise    |
| ENSMUSG00000033083 | Tbc1d4        | 210789 | brown        |
| ENSMUSG00000026355 | Mcm6          | 17219  | salmon       |
| ENSMUSG00000102038 | NA            | NA     | midnightblue |
| ENSMUSG00000026356 | Dars          | 226414 | green        |
| ENSMUSG00000033088 | Triobp        | 110253 | blue         |
| ENSMUSG00000022620 | Arsa          | 11883  | yellow       |
| ENSMUSG00000022621 | Rab12         | 68708  | turquoise    |
| ENSMUSG00000044018 | Mrpl50        | 28028  | blue         |
| ENSMUSG00000012114 | Med15         | 94112  | blue         |
| ENSMUSG00000022629 | Kif21a        | 16564  | green        |
| ENSMUSG00000012117 | Dhdds         | 67422  | blue         |
| ENSMUSG00000097121 | D130020L05Rik | 319760 | magenta      |
| ENSMUSG00000079467 | NA            | NA     | turquoise    |
| ENSMUSG00000079469 | Pigb          | 55981  | yellow       |
| ENSMUSG00000086199 | Bcas3os1      | 71489  | turquoise    |
| ENSMUSG00000082460 | NA            | NA     | greenyellow  |
| ENSMUSG00000082464 | NA            | NA     | turquoise    |

|                    |               |           |              |
|--------------------|---------------|-----------|--------------|
| ENSMUSG00000082465 | NA            | NA        | tan          |
| ENSMUSG00000037058 | Paip2         | 67869     | midnightblue |
| ENSMUSG00000082467 | NA            | NA        | turquoise    |
| ENSMUSG00000101856 | 1700096K18Rik | 73571     | turquoise    |
| ENSMUSG00000022390 | Zc3h7b        | 20286     | pink         |
| ENSMUSG00000022391 | Rangap1       | 19387     | magenta      |
| ENSMUSG00000005150 | Wdr83         | 67836     | blue         |
| ENSMUSG00000043831 | Lysmd4        | 75099     | turquoise    |
| ENSMUSG00000043833 | 2900005J15Rik | 67261     | turquoise    |
| ENSMUSG00000022394 | L3mbtl2       | 214669    | blue         |
| ENSMUSG00000033323 | Ctdp1         | 67655     | blue         |
| ENSMUSG00000015668 | Pdzd11        | 72621     | blue         |
| ENSMUSG00000050565 | Tor1aip2      | 240832    | black        |
| ENSMUSG00000050567 | Maml1         | 103806    | grey60       |
| ENSMUSG00000040054 | Baz2a         | 116848    | turquoise    |
| ENSMUSG00000033326 | Kdm4a         | 230674    | turquoise    |
| ENSMUSG00000040055 | Gjb6          | 14623     | purple       |
| ENSMUSG00000001424 | Snd1          | 56463     | black        |
| ENSMUSG00000096942 | NA            | NA        | black        |
| ENSMUSG00000096948 | NA            | NA        | yellow       |
| ENSMUSG00000058267 | NA            | NA        | turquoise    |
| ENSMUSG00000086436 | NA            | NA        | red          |
| ENSMUSG00000036873 | NA            | NA        | red          |
| ENSMUSG00000026361 | NA            | NA        | blue         |
| ENSMUSG00000036875 | Dna2          | 327762    | blue         |
| ENSMUSG00000047804 | Akap10        | 56697     | turquoise    |
| ENSMUSG00000036879 | Phkb          | 102093    | turquoise    |
| ENSMUSG00000102048 | NA            | NA        | turquoise    |
| ENSMUSG00000044022 | NA            | NA        | turquoise    |
| ENSMUSG00000033096 | Apmap         | 71881     | turquoise    |
| ENSMUSG00000082705 | NA            | NA        | turquoise    |
| ENSMUSG00000082706 | NA            | NA        | lightcyan    |
| ENSMUSG00000033099 | NA            | NA        | red          |
| ENSMUSG00000082709 | NA            | NA        | turquoise    |
| ENSMUSG00000022634 | Yaf2          | 67057     | green        |
| ENSMUSG00000022635 | Zcrb1         | 67197     | red          |
| ENSMUSG00000022636 | Alcam         | 11658     | yellow       |
| ENSMUSG00000022637 | Cblb          | 208650    | turquoise    |
| ENSMUSG00000079470 | Utp14b        | 195434    | yellow       |
| ENSMUSG00000012126 | Ubxn11        | 67586     | yellow       |
| ENSMUSG00000089988 | NA            | NA        | turquoise    |
| ENSMUSG00000079477 | Rab7          | 19349     | yellow       |
| ENSMUSG00000079478 | Sssca1        | 56390     | yellow       |
| ENSMUSG00000105595 | NA            | NA        | turquoise    |
| ENSMUSG00000097136 | NA            | NA        | lightcyan    |
| ENSMUSG00000105599 | NA            | NA        | pink         |
| ENSMUSG00000037060 | Prkcdbp       | 109042    | greenyellow  |
| ENSMUSG00000037062 | Sh3glb1       | 54673     | blue         |
| ENSMUSG00000058503 | Fam133b       | 68152     | green        |
| ENSMUSG00000101862 | NA            | NA        | turquoise    |
| ENSMUSG00000082475 | NA            | NA        | tan          |
| ENSMUSG00000092988 | Mir3093       | 100526540 | turquoise    |
| ENSMUSG00000093402 | NA            | NA        | turquoise    |
| ENSMUSG00000082476 | NA            | NA        | lightcyan    |

|                    |          |    |           |             |
|--------------------|----------|----|-----------|-------------|
| ENSMUSG00000015671 | Psma2    |    | 19166     | blue        |
| ENSMUSG00000015672 | Mrpl32   |    | 75398     | brown       |
| ENSMUSG00000082478 | NA       | NA |           | lightcyan   |
| ENSMUSG00000026600 | NA       | NA |           | yellow      |
| ENSMUSG00000005161 | NA       | NA |           | black       |
| ENSMUSG00000043843 | Tmem145  |    | 330485    | turquoise   |
| ENSMUSG00000026603 | Smyd2    |    | 226830    | blue        |
| ENSMUSG00000026605 | Cenpf    |    | 108000    | magenta     |
| ENSMUSG00000033335 | Dnm2     |    | 13430     | turquoise   |
| ENSMUSG00000026608 | Kctd3    |    | 226823    | red         |
| ENSMUSG00000001436 | Slc19a1  |    | 20509     | turquoise   |
| ENSMUSG00000096954 | NA       | NA |           | brown       |
| ENSMUSG00000105833 | NA       | NA |           | pink        |
| ENSMUSG00000036880 | Acaa2    |    | 52538     | greenyellow |
| ENSMUSG00000069206 | Zfp874a  |    | 238692    | cyan        |
| ENSMUSG00000036882 | Arhgap33 |    | 233071    | magenta     |
| ENSMUSG00000086448 | NA       | NA |           | turquoise   |
| ENSMUSG00000069208 | Zfp825   |    | 235956    | blue        |
| ENSMUSG00000036885 | Arhgef26 |    | 622434    | turquoise   |
| ENSMUSG00000093178 | Snord87  |    | 266793    | cyan        |
| ENSMUSG00000037300 | Ttc13    |    | 234875    | blue        |
| ENSMUSG00000026374 | NA       | NA |           | green       |
| ENSMUSG00000019647 | Sema6a   |    | 20358     | turquoise   |
| ENSMUSG00000082711 | NA       | NA |           | yellow      |
| ENSMUSG00000044030 | Irf2bp1  |    | 272359    | green       |
| ENSMUSG00000061272 | NA       | NA |           | turquoise   |
| ENSMUSG00000061273 | Mmgt1    |    | 236792    | blue        |
| ENSMUSG00000102059 | Gm20257  |    | 100504501 | turquoise   |
| ENSMUSG00000026377 | Nifk     |    | 67949     | black       |
| ENSMUSG00000004980 | NA       | NA |           | greenyellow |
| ENSMUSG00000044033 | Ccdc141  |    | 545428    | turquoise   |
| ENSMUSG00000082715 | NA       | NA |           | yellow      |
| ENSMUSG00000037306 | Man1c1   |    | 230815    | yellow      |
| ENSMUSG00000044037 | Als2cl   |    | 235633    | turquoise   |
| ENSMUSG00000022641 | Bbx      |    | 70508     | green       |
| ENSMUSG00000050812 | AI314180 |    | 230249    | brown       |
| ENSMUSG00000040302 | Rbm48    |    | 269623    | turquoise   |
| ENSMUSG00000089992 | NA       | NA |           | turquoise   |
| ENSMUSG00000089993 | NA       | NA |           | tan         |
| ENSMUSG00000079480 | Pin4     |    | 69713     | brown       |
| ENSMUSG00000089998 | Phtf1os  |    | 100125931 | turquoise   |
| ENSMUSG00000097140 | NA       | NA |           | turquoise   |
| ENSMUSG00000097141 | NA       | NA |           | pink        |
| ENSMUSG00000089999 | NA       | NA |           | red         |
| ENSMUSG00000079487 | Med12    |    | 59024     | turquoise   |
| ENSMUSG00000097148 | NA       | NA |           | turquoise   |
| ENSMUSG00000037070 | Rbmxl1   |    | 19656     | red         |
| ENSMUSG00000037071 | Scd1     |    | 20249     | turquoise   |
| ENSMUSG00000082481 | NA       | NA |           | turquoise   |
| ENSMUSG00000037072 | 14-Sep   |    | 93684     | greenyellow |
| ENSMUSG00000048000 | Gigyf2   |    | 227331    | turquoise   |
| ENSMUSG00000048001 | Hes5     |    | 15208     | turquoise   |
| ENSMUSG00000037075 | Rnf139   |    | 75841     | turquoise   |
| ENSMUSG00000092998 | Mir5099  |    | 100628578 | turquoise   |

|                    |               |        |             |
|--------------------|---------------|--------|-------------|
| ENSMUSG00000101875 | NA            | NA     | tan         |
| ENSMUSG00000082487 | NA            | NA     | turquoise   |
| ENSMUSG00000048007 | Timm8a1       | 30058  | blue        |
| ENSMUSG00000008958 | Vps72         | 21427  | blue        |
| ENSMUSG00000026614 | Slc30a10      | 226781 | yellow      |
| ENSMUSG00000026615 | Eprs          | 107508 | red         |
| ENSMUSG00000026617 | Bpnt1         | 23827  | green       |
| ENSMUSG00000026618 | Iars2         | 381314 | turquoise   |
| ENSMUSG00000050587 | Lrrc4c        | 241568 | yellow      |
| ENSMUSG00000061517 | Sox21         | 223227 | turquoise   |
| ENSMUSG00000001440 | Kpnb1         | 16211  | red         |
| ENSMUSG00000061518 | NA            | NA     | blue        |
| ENSMUSG00000040078 | NA            | NA     | green       |
| ENSMUSG00000001441 | Npepps        | 19155  | turquoise   |
| ENSMUSG00000051007 | Pddc1         | 213350 | turquoise   |
| ENSMUSG00000001445 | Mrpl10        | 107732 | blue        |
| ENSMUSG00000011958 | Bnip2         | 12175  | yellow      |
| ENSMUSG00000068798 | Rap1a         | 109905 | lightcyan   |
| ENSMUSG00000036890 | Gtdc1         | 227835 | turquoise   |
| ENSMUSG00000026380 | Tfcp2l1       | 81879  | yellow      |
| ENSMUSG00000036893 | Ehmt1         | 77683  | blue        |
| ENSMUSG00000036894 | NA            | NA     | blue        |
| ENSMUSG00000026383 | Epb4115       | 226352 | greenyellow |
| ENSMUSG00000071793 | 2610005L07Rik | 381598 | turquoise   |
| ENSMUSG00000026384 | Ptpn4         | 19258  | turquoise   |
| ENSMUSG00000047824 | Pygo2         | 68911  | blue        |
| ENSMUSG00000026385 | Dbi           | 13167  | yellow      |
| ENSMUSG00000036898 | Zfp157        | 72154  | pink        |
| ENSMUSG00000037313 | Tacc3         | 21335  | magenta     |
| ENSMUSG00000019659 | Ccdc12        | 72654  | blue        |
| ENSMUSG00000071796 | 6820431F20Rik | 547150 | turquoise   |
| ENSMUSG00000026388 | 3110009E18Rik | 73103  | grey60      |
| ENSMUSG00000037316 | Bag4          | 67384  | yellow      |
| ENSMUSG00000026389 | Steap3        | 68428  | turquoise   |
| ENSMUSG00000061286 | Exosc5        | 27998  | green       |
| ENSMUSG00000072214 | 4-Sep         | 18951  | blue        |
| ENSMUSG00000004994 | Ccdc130       | 67736  | turquoise   |
| ENSMUSG00000061288 | Taok3         | 330177 | yellow      |
| ENSMUSG00000004996 | NA            | NA     | green       |
| ENSMUSG00000005410 | Mcm5          | 17218  | salmon      |
| ENSMUSG00000082729 | NA            | NA     | turquoise   |
| ENSMUSG00000050821 | Fam131a       | 78408  | turquoise   |
| ENSMUSG00000005413 | Hmox1         | 15368  | turquoise   |
| ENSMUSG00000022656 | Pvrl3         | 58998  | turquoise   |
| ENSMUSG00000040312 | Cchcr1        | 240084 | blue        |
| ENSMUSG00000022658 | Tagln3        | 56370  | turquoise   |
| ENSMUSG00000005417 | Mprlp         | 26936  | blue        |
| ENSMUSG00000079494 | Cml5          | 69049  | yellow      |
| ENSMUSG00000079499 | 6530402F18Rik | 76220  | turquoise   |
| ENSMUSG00000097156 | NA            | NA     | yellow      |
| ENSMUSG00000097157 | NA            | NA     | yellow      |
| ENSMUSG00000082491 | NA            | NA     | green       |
| ENSMUSG00000106037 | NA            | NA     | black       |
| ENSMUSG00000106038 | NA            | NA     | turquoise   |

|                    |               |           |           |
|--------------------|---------------|-----------|-----------|
| ENSMUSG00000037089 | Slc35b2       | 73836     | turquoise |
| ENSMUSG00000033350 | NA            | NA        | purple    |
| ENSMUSG00000026622 | Nek2          | 18005     | magenta   |
| ENSMUSG00000026623 | Lpgat1        | 226856    | turquoise |
| ENSMUSG00000033352 | Map2k4        | 26398     | blue      |
| ENSMUSG00000015697 | Setdb1        | 84505     | blue      |
| ENSMUSG00000043866 | NA            | NA        | black     |
| ENSMUSG00000026626 | Ppp2r5a       | 226849    | turquoise |
| ENSMUSG00000026627 | NA            | NA        | brown     |
| ENSMUSG00000040084 | Bub1b         | 12236     | magenta   |
| ENSMUSG00000011960 | Ccnt1         | 12455     | blue      |
| ENSMUSG00000058290 | Espl1         | 105988    | magenta   |
| ENSMUSG00000058291 | Zfp68         | 24135     | blue      |
| ENSMUSG00000096974 | NA            | NA        | turquoise |
| ENSMUSG00000096975 | NA            | NA        | turquoise |
| ENSMUSG00000058297 | Spock2        | 94214     | brown     |
| ENSMUSG00000105854 | Gm8925        | 668015    | lightcyan |
| ENSMUSG00000058298 | NA            | NA        | turquoise |
| ENSMUSG00000102070 | NA            | NA        | yellow    |
| ENSMUSG00000096979 | NA            | NA        | brown     |
| ENSMUSG00000047832 | Cdca4         | 71963     | salmon    |
| ENSMUSG00000026393 | Nek7          | 59125     | brown     |
| ENSMUSG00000037325 | Bbs7          | 71492     | blue      |
| ENSMUSG00000037326 | Capn15        | 50817     | blue      |
| ENSMUSG00000082737 | NA            | NA        | yellow    |
| ENSMUSG00000015932 | Dstn          | 56431     | green     |
| ENSMUSG00000022663 | Atg3          | 67841     | blue      |
| ENSMUSG00000022664 | Slc35a5       | 74102     | turquoise |
| ENSMUSG00000015937 | H2afy         | 26914     | green     |
| ENSMUSG00000022668 | NA            | NA        | blue      |
| ENSMUSG00000040323 | NA            | NA        | turquoise |
| ENSMUSG00000040325 | Vprbp         | 321006    | blue      |
| ENSMUSG00000040327 | Cul9          | 78309     | brown     |
| ENSMUSG00000097162 | 2310010J17Rik | 78329     | turquoise |
| ENSMUSG00000097167 | Gm16740       | 100504029 | lightcyan |
| ENSMUSG00000106044 | NA            | NA        | turquoise |
| ENSMUSG00000101892 | 9130401M01Rik | 75758     | blue      |
| ENSMUSG00000048022 | Tmem229a      | 319832    | purple    |
| ENSMUSG00000106049 | NA            | NA        | yellow    |
| ENSMUSG00000037096 | NA            | NA        | blue      |
| ENSMUSG00000037098 | Rab11fip3     | 215445    | blue      |
| ENSMUSG00000043870 | NA            | NA        | pink      |
| ENSMUSG00000048027 | Rgmb          | 68799     | turquoise |
| ENSMUSG00000093436 | NA            | NA        | turquoise |
| ENSMUSG00000008976 | Gabpa         | 14390     | blue      |
| ENSMUSG00000043872 | Zmym1         | 68310     | salmon    |
| ENSMUSG00000026632 | Tatdn3        | 68972     | yellow    |
| ENSMUSG00000026634 | Angel2        | 52477     | red       |
| ENSMUSG00000019907 | Ppp1r12a      | 17931     | turquoise |
| ENSMUSG00000033364 | Usp37         | 319651    | black     |
| ENSMUSG00000061533 | Cep128        | 75216     | blue      |
| ENSMUSG00000033365 | Ipo13         | 230673    | brown     |
| ENSMUSG00000005198 | Polr2a        | 20020     | green     |
| ENSMUSG00000061536 | Sec22c        | 215474    | turquoise |

|                     |              |           |              |
|---------------------|--------------|-----------|--------------|
| ENSMUSG00000054808  | Actn4        | 60595     | green        |
| ENSMUSG00000040097  | Flywch1      | 224613    | green        |
| ENSMUSG00000016128  | Stard13      | 243362    | turquoise    |
| ENSMUSG00000022905  | Kpna1        | 16646     | blue         |
| ENSMUSG00000001467  | Cyp51        | 13121     | turquoise    |
| ENSMUSG00000096980  | NA           | NA        | turquoise    |
| ENSMUSG00000096981  | Gm16845      | 100503652 | turquoise    |
| ENSMUSG00000086473  | NA           | NA        | brown        |
| ENSMUSG00000069236  | NA           | NA        | yellow       |
| ENSMUSG000000105866 | NA           | NA        | turquoise    |
| ENSMUSG00000097405  | NA           | NA        | blue         |
| ENSMUSG00000069237  | Fam8a1       | 97863     | yellow       |
| ENSMUSG00000047843  | Bri3         | 55950     | turquoise    |
| ENSMUSG00000037331  | Larp1        | 73158     | blue         |
| ENSMUSG00000082740  | NA           | NA        | turquoise    |
| ENSMUSG00000047844  | Bex4         | 406217    | blue         |
| ENSMUSG00000082741  | NA           | NA        | yellow       |
| ENSMUSG00000044060  | A830010M20Ri | 231570    | turquoise    |
| ENSMUSG00000082743  | NA           | NA        | turquoise    |
| ENSMUSG00000044066  | Cep68        | 216543    | blue         |
| ENSMUSG00000072235  | Tuba1a       | 22142     | yellow       |
| ENSMUSG00000015942  | Gtf2ird2     | 114674    | turquoise    |
| ENSMUSG00000037339  | Fam53a       | 74504     | green        |
| ENSMUSG00000022671  | Mzt2         | 72083     | green        |
| ENSMUSG00000015943  | Bola1        | 69168     | turquoise    |
| ENSMUSG00000022672  | Prkdc        | 19090     | turquoise    |
| ENSMUSG00000015944  | NA           | NA        | grey60       |
| ENSMUSG00000050840  | Cdh20        | 23836     | turquoise    |
| ENSMUSG00000022673  | Mcm4         | 17217     | salmon       |
| ENSMUSG00000022674  | NA           | NA        | blue         |
| ENSMUSG00000040331  | Nsmce4a      | 67872     | black        |
| ENSMUSG00000022677  | Fopnl        | 66086     | blue         |
| ENSMUSG00000022678  | Nde1         | 67203     | brown        |
| ENSMUSG00000050846  | Zfp623       | 78834     | pink         |
| ENSMUSG00000022679  | Mpv17l       | 93734     | turquoise    |
| ENSMUSG00000001700  | Gramd3       | 107022    | green        |
| ENSMUSG00000040339  | Fam102b      | 329739    | turquoise    |
| ENSMUSG00000097175  | NA           | NA        | lightcyan    |
| ENSMUSG00000001707  | Eef1e1       | 66143     | red          |
| ENSMUSG00000097177  | 9330159M07Ri | 319673    | turquoise    |
| ENSMUSG00000058542  | NA           | NA        | blue         |
| ENSMUSG000000106057 | NA           | NA        | yellow       |
| ENSMUSG00000058546  | Rpl23a       | 268449    | black        |
| ENSMUSG00000086714  | NA           | NA        | pink         |
| ENSMUSG00000043881  | Kbtbd7       | 211255    | turquoise    |
| ENSMUSG00000026640  | Plxna2       | 18845     | cyan         |
| ENSMUSG00000026641  | Usf1         | 22278     | midnightblue |
| ENSMUSG00000048039  | Isg20l2      | 229504    | blue         |
| ENSMUSG00000026643  | Nmt2         | 18108     | black        |
| ENSMUSG00000043885  | Slc36a4      | 234967    | turquoise    |
| ENSMUSG00000019916  | P4ha1        | 18451     | yellow       |
| ENSMUSG00000033373  | Fntb         | 110606    | turquoise    |
| ENSMUSG00000019917  | 9-Sep        | 103080    | red          |
| ENSMUSG00000054814  | NA           | NA        | turquoise    |

|                    |               |           |             |
|--------------------|---------------|-----------|-------------|
| ENSMUSG0000009406  | Elk1          | 13712     | turquoise   |
| ENSMUSG00000061544 | Zfp229        | 381067    | turquoise   |
| ENSMUSG00000043889 | NA            | NA        | green       |
| ENSMUSG00000026648 | Dclre1c       | 227525    | pink        |
| ENSMUSG00000051034 | Zfp11         | 22648     | brown       |
| ENSMUSG00000033379 | Atp6v0b       | 114143    | yellow      |
| ENSMUSG00000022911 | Arl13b        | 68146     | blue        |
| ENSMUSG00000044308 | Ubr3          | 68795     | turquoise   |
| ENSMUSG00000022912 | Pros1         | 19128     | turquoise   |
| ENSMUSG00000001472 | Tcf25         | 66855     | yellow      |
| ENSMUSG00000022913 | Psmg1         | 56088     | green       |
| ENSMUSG00000022914 | Brwd1         | 93871     | green       |
| ENSMUSG00000012405 | Rpl15         | 66480     | black       |
| ENSMUSG00000096996 | NA            | NA        | turquoise   |
| ENSMUSG00000086484 | Nron          | 320482    | turquoise   |
| ENSMUSG00000097412 | NA            | NA        | turquoise   |
| ENSMUSG00000105875 | NA            | NA        | turquoise   |
| ENSMUSG00000105879 | NA            | NA        | black       |
| ENSMUSG00000037343 | Taf2          | 319944    | black       |
| ENSMUSG00000044072 | Eml6          | 237711    | blue        |
| ENSMUSG00000019689 | 1110001J03Rik | 66117     | turquoise   |
| ENSMUSG00000037344 | Slc12a9       | 83704     | blue        |
| ENSMUSG00000082755 | Gm8692        | 667537    | tan         |
| ENSMUSG00000072244 | Trim6         | 94088     | turquoise   |
| ENSMUSG00000055003 | Lrtm2         | 211187    | yellow      |
| ENSMUSG00000037348 | Paqr7         | 71904     | black       |
| ENSMUSG00000037349 | Nudt22        | 68323     | brown       |
| ENSMUSG00000022680 | Pdxdc1        | 94184     | turquoise   |
| ENSMUSG00000022681 | Ntan1         | 18203     | brown       |
| ENSMUSG00000022682 | Rrn3          | 106298    | green       |
| ENSMUSG00000033610 | NA            | NA        | turquoise   |
| ENSMUSG00000005442 | Cic           | 71722     | turquoise   |
| ENSMUSG00000022684 | Bfar          | 67118     | turquoise   |
| ENSMUSG00000022685 | Parn          | 74108     | brown       |
| ENSMUSG00000022686 | B3gnt5        | 108105    | salmon      |
| ENSMUSG00000022687 | Boc           | 117606    | yellow      |
| ENSMUSG00000050855 | Zfp940        | 233057    | turquoise   |
| ENSMUSG00000005447 | Pafah1b3      | 18476     | greenyellow |
| ENSMUSG00000050856 | NA            | NA        | turquoise   |
| ENSMUSG00000023104 | NA            | NA        | black       |
| ENSMUSG00000023106 | Denr          | 68184     | red         |
| ENSMUSG00000097180 | 2700038G22Rik | 67194     | blue        |
| ENSMUSG00000048040 | Arxes2        | 76976     | green       |
| ENSMUSG00000086721 | NA            | NA        | brown       |
| ENSMUSG00000086725 | NA            | NA        | turquoise   |
| ENSMUSG00000019920 | Lims1         | 110829    | blue        |
| ENSMUSG00000058558 | Rpl5          | 100503670 | black       |
| ENSMUSG00000019923 | Zwint         | 52696     | turquoise   |
| ENSMUSG00000076218 | Mir692-1      | 751529    | blue        |
| ENSMUSG00000033382 | Trappc8       | 75964     | turquoise   |
| ENSMUSG00000054823 | Whsc111       | 234135    | turquoise   |
| ENSMUSG00000019927 | Ube2d1        | 216080    | red         |
| ENSMUSG00000026655 | Fam107b       | 66540     | blue        |
| ENSMUSG00000026657 | Frmd4a        | 209630    | turquoise   |

|                     |          |        |             |
|---------------------|----------|--------|-------------|
| ENSMUSG00000051041  | Olfml1   | 244198 | yellow      |
| ENSMUSG00000009418  | Nav1     | 215690 | greenyellow |
| ENSMUSG00000026659  | Dusp12   | 80915  | blue        |
| ENSMUSG00000061559  | Wdr61    | 66317  | turquoise   |
| ENSMUSG00000001482  | Def8     | 23854  | turquoise   |
| ENSMUSG000000105881 | NA       | NA     | brown       |
| ENSMUSG00000069255  | Dusp22   | 105352 | turquoise   |
| ENSMUSG00000097428  | NA       | NA     | purple      |
| ENSMUSG00000037351  | Actr1b   | 226977 | turquoise   |
| ENSMUSG00000044080  | S100a1   | 20193  | red         |
| ENSMUSG00000037353  | Letmd1   | 68614  | turquoise   |
| ENSMUSG00000047866  | Lonp2    | 66887  | turquoise   |
| ENSMUSG00000082762  | NA       | NA     | turquoise   |
| ENSMUSG00000019699  | Akt3     | 23797  | turquoise   |
| ENSMUSG00000037355  | Uvssa    | 71101  | turquoise   |
| ENSMUSG00000015961  | Adss     | 11566  | blue        |
| ENSMUSG00000072255  | NA       | NA     | tan         |
| ENSMUSG00000082768  | NA       | NA     | yellow      |
| ENSMUSG00000023110  | Prmt5    | 27374  | turquoise   |
| ENSMUSG00000015968  | Cacna1d  | 12289  | yellow      |
| ENSMUSG00000033623  | NA       | NA     | pink        |
| ENSMUSG00000040351  | Ankib1   | 70797  | blue        |
| ENSMUSG00000033624  | NA       | NA     | yellow      |
| ENSMUSG00000022698  | Naa50    | 72117  | black       |
| ENSMUSG00000040354  | Mars     | 216443 | green       |
| ENSMUSG00000033628  | Pik3c3   | 225326 | blue        |
| ENSMUSG00000040356  | Skiv2l   | 108077 | green       |
| ENSMUSG00000033629  | Hacd3    | 57874  | purple      |
| ENSMUSG00000023118  | Sympk    | 68188  | turquoise   |
| ENSMUSG00000040359  | Ufl1     | 67490  | yellow      |
| ENSMUSG00000097195  | Snhg5    | 72655  | red         |
| ENSMUSG00000001729  | Akt1     | 11651  | green       |
| ENSMUSG00000058567  | NA       | NA     | yellow      |
| ENSMUSG00000058569  | Tmed9    | 67511  | brown       |
| ENSMUSG00000048058  | Ldlrad3  | 241576 | blue        |
| ENSMUSG000000102344 | NA       | NA     | blue        |
| ENSMUSG00000026662  | Sephs1   | 109079 | green       |
| ENSMUSG00000026663  | Atf6     | 226641 | blue        |
| ENSMUSG00000033392  | Clasp2   | 76499  | brown       |
| ENSMUSG00000026664  | Phyh     | 16922  | turquoise   |
| ENSMUSG00000026667  | NA       | NA     | turquoise   |
| ENSMUSG00000054836  | Elp6     | 72341  | blue        |
| ENSMUSG00000033396  | Spg11    | 214585 | green       |
| ENSMUSG00000026669  | Mcm10    | 70024  | salmon      |
| ENSMUSG00000044328  | Trp53i13 | 216964 | yellow      |
| ENSMUSG00000012422  | NA       | NA     | green       |
| ENSMUSG00000012429  | Mplkip   | 66308  | turquoise   |
| ENSMUSG000000105892 | NA       | NA     | grey60      |
| ENSMUSG00000097431  | NA       | NA     | turquoise   |
| ENSMUSG00000037361  | Sf3b6    | 66055  | black       |
| ENSMUSG00000037363  | Letm2    | 270035 | turquoise   |
| ENSMUSG00000037364  | Srrt     | 83701  | black       |
| ENSMUSG00000047879  | Usp14    | 59025  | green       |
| ENSMUSG00000037366  | Pafah2   | 100163 | turquoise   |



|                     |              |    |        |              |
|---------------------|--------------|----|--------|--------------|
| ENSMUSG00000015971  | Actr8        |    | 56249  | turquoise    |
| ENSMUSG00000055024  | Ep300        |    | 328572 | yellow       |
| ENSMUSG00000058809  | NA           | NA |        | green        |
| ENSMUSG00000082778  | NA           | NA |        | yellow       |
| ENSMUSG00000037369  | Kdm6a        |    | 22289  | blue         |
| ENSMUSG00000044098  | Rsb1         |    | 229675 | turquoise    |
| ENSMUSG00000033632  | AW554918     |    | 225289 | blue         |
| ENSMUSG00000050875  | A730017C20Ri |    | 225583 | yellow       |
| ENSMUSG00000040363  | Bcor         |    | 71458  | salmon       |
| ENSMUSG00000040365  | Trim41       |    | 211007 | yellow       |
| ENSMUSG00000005469  | Prkaca       |    | 18747  | midnightblue |
| ENSMUSG00000058571  | Gpc6         |    | 23888  | purple       |
| ENSMUSG00000093473  | NA           | NA |        | pink         |
| ENSMUSG00000019942  | Cdk1         |    | 12534  | magenta      |
| ENSMUSG00000026670  | Uap1         |    | 107652 | blue         |
| ENSMUSG00000019943  | Atp2b1       |    | 67972  | turquoise    |
| ENSMUSG00000026672  | Optn         |    | 71648  | turquoise    |
| ENSMUSG00000037601  | NA           | NA |        | red          |
| ENSMUSG00000026674  | Ddr2         |    | 18214  | blue         |
| ENSMUSG00000054843  | Atrnl1       |    | 226255 | turquoise    |
| ENSMUSG00000019947  | Arid5b       |    | 71371  | turquoise    |
| ENSMUSG00000044330  | NA           | NA |        | turquoise    |
| ENSMUSG000000102357 | NA           | NA |        | turquoise    |
| ENSMUSG00000026675  | Hsd17b7      |    | 15490  | turquoise    |
| ENSMUSG00000019948  | Actr6        |    | 67019  | blue         |
| ENSMUSG00000072501  | Phf20i1      |    | 239510 | turquoise    |
| ENSMUSG00000037605  | Adgrl3       |    | 319387 | purple       |
| ENSMUSG00000037608  | Bclaf1       |    | 72567  | turquoise    |
| ENSMUSG00000022940  | Pigp         |    | 56176  | turquoise    |
| ENSMUSG00000044337  | NA           | NA |        | yellow       |
| ENSMUSG00000044339  | Alkbh2       |    | 231642 | grey60       |
| ENSMUSG00000022945  | Chaf1b       |    | 110749 | salmon       |
| ENSMUSG00000022946  | Dopey2       |    | 70028  | yellow       |
| ENSMUSG00000022947  | Cbr3         |    | 109857 | purple       |
| ENSMUSG00000022948  | Setd4        |    | 224440 | turquoise    |
| ENSMUSG000000106320 | NA           | NA |        | blue         |
| ENSMUSG00000097445  | NA           | NA |        | yellow       |
| ENSMUSG00000047880  | Cxcr5        |    | 12145  | yellow       |
| ENSMUSG00000047881  | Rell1        |    | 100532 | turquoise    |
| ENSMUSG000000106327 | NA           | NA |        | cyan         |
| ENSMUSG00000037373  | Ctbp1        |    | 13016  | green        |
| ENSMUSG00000047888  | Tnrc6b       |    | 213988 | yellow       |
| ENSMUSG00000058816  | NA           | NA |        | turquoise    |
| ENSMUSG00000037376  | Trmt6        |    | 66926  | blue         |
| ENSMUSG00000093716  | NA           | NA |        | tan          |
| ENSMUSG00000048307  | Ankrd46      |    | 68839  | turquoise    |
| ENSMUSG00000026914  | Psm14        |    | 59029  | blue         |
| ENSMUSG00000040370  | Lym5         |    | 67636  | turquoise    |
| ENSMUSG00000026915  | Strbp        |    | 20744  | brown        |
| ENSMUSG00000040373  | Cacng5       |    | 140723 | blue         |
| ENSMUSG00000026917  | Wdr5         |    | 140858 | red          |
| ENSMUSG00000026918  | Brd3         |    | 67382  | black        |
| ENSMUSG00000040374  | Pex2         |    | 19302  | turquoise    |
| ENSMUSG00000016409  | Nkap         |    | 67050  | red          |

|                    |           |           |              |
|--------------------|-----------|-----------|--------------|
| ENSMUSG00000051306 | Usp42     | 76800     | turquoise    |
| ENSMUSG00000058586 | Serhl     | 68607     | turquoise    |
| ENSMUSG00000093483 | AA465934  | 613254    | turquoise    |
| ENSMUSG00000058587 | Tmod3     | 50875     | green        |
| ENSMUSG00000048076 | Arf1      | 11840     | brown        |
| ENSMUSG00000058589 | Anks1b    | 77531     | pink         |
| ENSMUSG00000019951 | Uhrf1bp1l | 75089     | turquoise    |
| ENSMUSG00000019952 | Poc1b     | 382406    | green        |
| ENSMUSG00000059005 | Hnrnpa3   | 229279    | blue         |
| ENSMUSG00000026683 | Nuf2      | 66977     | magenta      |
| ENSMUSG00000044340 | Phlpp1    | 98432     | black        |
| ENSMUSG00000026687 | Aldh9a1   | 56752     | turquoise    |
| ENSMUSG00000026688 | NA        | NA        | turquoise    |
| ENSMUSG00000037617 | Spag1     | 26942     | brown        |
| ENSMUSG00000027104 | Atf2      | 11909     | green        |
| ENSMUSG00000022951 | Rcan1     | 54720     | turquoise    |
| ENSMUSG00000061589 | Dot1l     | 208266    | blue         |
| ENSMUSG00000044348 | Slc25a53  | 67062     | turquoise    |
| ENSMUSG00000027108 | Ola1      | 67059     | blue         |
| ENSMUSG00000027109 | Sp3       | 20687     | green        |
| ENSMUSG00000062006 | Rpl34     | 68436     | black        |
| ENSMUSG00000012443 | Kif11     | 16551     | magenta      |
| ENSMUSG00000022956 | Atp5o     | 28080     | blue         |
| ENSMUSG00000022957 | Itsn1     | 16443     | turquoise    |
| ENSMUSG00000040612 | Ildr2     | 100039795 | turquoise    |
| ENSMUSG00000040613 | Apobec1   | 11810     | turquoise    |
| ENSMUSG00000005718 | Tfap4     | 83383     | red          |
| ENSMUSG00000030101 | Sumf1     | 58911     | turquoise    |
| ENSMUSG00000030102 | Itpr1     | 16438     | brown        |
| ENSMUSG00000030103 | Bhlhe40   | 20893     | greenyellow  |
| ENSMUSG00000030104 | Edem1     | 192193    | brown        |
| ENSMUSG00000040618 | Pck2      | 74551     | green        |
| ENSMUSG00000030105 | NA        | NA        | turquoise    |
| ENSMUSG00000082791 | NA        | NA        | brown        |
| ENSMUSG00000048310 | Pskh1     | 244631    | blue         |
| ENSMUSG00000055041 | Commd5    | 66398     | turquoise    |
| ENSMUSG00000037386 | NA        | NA        | turquoise    |
| ENSMUSG00000083210 | NA        | NA        | brown        |
| ENSMUSG00000102602 | NA        | NA        | turquoise    |
| ENSMUSG00000005481 | Ddx39     | 68278     | blue         |
| ENSMUSG00000015994 | Fnta      | 14272     | turquoise    |
| ENSMUSG00000050890 | Pdik1l    | 230809    | green        |
| ENSMUSG00000050891 | Tatdn1    | 69694     | brown        |
| ENSMUSG00000005483 | Dnajb1    | 81489     | red          |
| ENSMUSG00000026923 | Notch1    | 18128     | blue         |
| ENSMUSG00000026924 | Sec16a    | 227648    | turquoise    |
| ENSMUSG00000033653 | Vps8      | 209018    | pink         |
| ENSMUSG00000026925 | Inpp5e    | 64436     | brown        |
| ENSMUSG00000026926 | Pmpca     | 66865     | black        |
| ENSMUSG00000083219 | NA        | NA        | turquoise    |
| ENSMUSG00000026927 | Sdccag3   | 68112     | green        |
| ENSMUSG00000040383 | Aqr       | 11834     | red          |
| ENSMUSG00000023143 | Nagpa     | 27426     | turquoise    |
| ENSMUSG00000040385 | Ppp1ca    | 19045     | midnightblue |

|                     |               |        |             |
|---------------------|---------------|--------|-------------|
| ENSMUSG00000033658  | Ddx19b        | 234733 | brown       |
| ENSMUSG00000040387  | Kihl32        | 212390 | turquoise   |
| ENSMUSG00000001750  | Tcirg1        | 27060  | turquoise   |
| ENSMUSG00000023147  | Wrb           | 71446  | greenyellow |
| ENSMUSG000000051316 | Taf7          | 24074  | turquoise   |
| ENSMUSG000000001751 | Naglu         | 27419  | turquoise   |
| ENSMUSG00000040389  | Wdr47         | 99512  | brown       |
| ENSMUSG000000051319 | 1500011K16Rik | 67885  | green       |
| ENSMUSG000000001755 | Coasy         | 71743  | turquoise   |
| ENSMUSG000000069520 | Tmem19        | 67226  | turquoise   |
| ENSMUSG000000058594 | Fbxo18        | 50755  | brown       |
| ENSMUSG000000019960 | Dusp6         | 67603  | turquoise   |
| ENSMUSG000000019961 | Tmpo          | 21917  | salmon      |
| ENSMUSG000000048087 | NA            | NA     | salmon      |
| ENSMUSG000000076258 | NA            | NA     | turquoise   |
| ENSMUSG000000019966 | Kitl          | 17311  | lightcyan   |
| ENSMUSG000000016181 | Diexf         | 215193 | turquoise   |
| ENSMUSG000000026694 | NA            | NA     | grey60      |
| ENSMUSG000000044350 | Lacc1         | 210808 | turquoise   |
| ENSMUSG000000037622 | Wdtd1         | 230796 | blue        |
| ENSMUSG000000026696 | Vamp4         | 53330  | turquoise   |
| ENSMUSG000000019969 | Psen1         | 19164  | yellow      |
| ENSMUSG000000027111 | NA            | NA     | yellow      |
| ENSMUSG000000026698 | Pigc          | 67292  | turquoise   |
| ENSMUSG000000027115 | Kif18a        | 228421 | magenta     |
| ENSMUSG000000062012 | Zfp13         | 22654  | blue        |
| ENSMUSG000000022960 | Donson        | 60364  | magenta     |
| ENSMUSG000000022961 | Son           | 20658  | yellow      |
| ENSMUSG000000022962 | Gart          | 14450  | black       |
| ENSMUSG000000062014 | Gmfb          | 63985  | red         |
| ENSMUSG000000022964 | Tmem50b       | 77975  | yellow      |
| ENSMUSG000000022965 | NA            | NA     | yellow      |
| ENSMUSG000000040620 | Dhx33         | 216877 | green       |
| ENSMUSG000000040621 | Gemin8        | 237221 | turquoise   |
| ENSMUSG000000022967 | Ifnar1        | 15975  | turquoise   |
| ENSMUSG000000040624 | Plekhg1       | 213783 | yellow      |
| ENSMUSG000000058833 | 2810428I15Rik | 66462  | green       |
| ENSMUSG000000058835 | Abi1          | 11308  | turquoise   |
| ENSMUSG000000037395 | Rcor3         | 214742 | yellow      |
| ENSMUSG000000083220 | NA            | NA     | lightcyan   |
| ENSMUSG000000093734 | NA            | NA     | turquoise   |
| ENSMUSG000000058838 | NA            | NA     | black       |
| ENSMUSG000000072294 | NA            | NA     | turquoise   |
| ENSMUSG000000055053 | Nfic          | 18029  | green       |
| ENSMUSG000000048327 | Ckap2l        | 70466  | magenta     |
| ENSMUSG000000026930 | Gpsm1         | 67839  | grey60      |
| ENSMUSG000000026932 | Nacc2         | 67991  | turquoise   |
| ENSMUSG000000026933 | Camsap1       | 227634 | blue        |
| ENSMUSG000000023150 | Ivns1abp      | 117198 | blue        |
| ENSMUSG000000061833 | NA            | NA     | turquoise   |
| ENSMUSG000000040396 | Abhd13        | 68904  | turquoise   |
| ENSMUSG000000016427 | Ndufa1        | 54405  | turquoise   |
| ENSMUSG000000023156 | Rpp14         | 67053  | red         |
| ENSMUSG000000061838 | Suclg2        | 20917  | turquoise   |

|                      |               |    |           |              |
|----------------------|---------------|----|-----------|--------------|
| ENSMUSG00000001761   | Smo           |    | 319757    | blue         |
| ENSMUSG000000051329  | Nup160        |    | 59015     | blue         |
| ENSMUSG000000001767  | Crnk1         |    | 66877     | red          |
| ENSMUSG000000001768  | Rin2          |    | 74030     | turquoise    |
| ENSMUSG000000097703  | NA            | NA |           | magenta      |
| ENSMUSG000000086779  | NA            | NA |           | turquoise    |
| ENSMUSG000000069539  | Scyl2         |    | 213326    | turquoise    |
| ENSMUSG000000019975  | Ikbip         |    | 67454     | yellow       |
| ENSMUSG000000097709  | 1700024F13Rik |    | 73270     | grey60       |
| ENSMUSG0000000102386 | NA            | NA |           | midnightblue |
| ENSMUSG000000019977  | Hbs1          |    | 56422     | brown        |
| ENSMUSG000000054874  | Pcnxl3        |    | 104401    | brown        |
| ENSMUSG000000019978  | Epb4112       |    | 13822     | blue         |
| ENSMUSG000000019979  | Apaf1         |    | 11783     | turquoise    |
| ENSMUSG000000016194  | Hsd11b1       |    | 15483     | purple       |
| ENSMUSG000000027122  | Arl14ep       |    | 212772    | turquoise    |
| ENSMUSG000000044365  | Cxxc4         |    | 319478    | turquoise    |
| ENSMUSG000000044367  | Slc16a13      |    | 69309     | turquoise    |
| ENSMUSG000000022971  | Ifnar2        |    | 15976     | turquoise    |
| ENSMUSG000000022972  | 1110004E09Rik |    | 68001     | turquoise    |
| ENSMUSG000000022973  | Synj1         |    | 104015    | turquoise    |
| ENSMUSG000000005732  | NA            | NA |           | black        |
| ENSMUSG000000051098  | Mblac2        |    | 72852     | turquoise    |
| ENSMUSG000000033900  | Map9          |    | 213582    | green        |
| ENSMUSG000000022974  | Paxbp1        |    | 67367     | blue         |
| ENSMUSG000000033904  | Ccp110        |    | 101565    | red          |
| ENSMUSG000000022978  | Mis18a        |    | 66578     | magenta      |
| ENSMUSG000000030120  | Mlf2          |    | 30853     | brown        |
| ENSMUSG000000030122  | Ptms          |    | 69202     | turquoise    |
| ENSMUSG000000033909  | Usp36         |    | 72344     | turquoise    |
| ENSMUSG000000030126  | Tmcc1         |    | 330401    | turquoise    |
| ENSMUSG000000030127  | Cops7a        |    | 26894     | black        |
| ENSMUSG000000048330  | Ric3          |    | 320360    | yellow       |
| ENSMUSG000000065571  | Mir326        |    | 723840    | turquoise    |
| ENSMUSG000000048332  | Lhfp          |    | 108927    | turquoise    |
| ENSMUSG000000048334  | NA            | NA |           | turquoise    |
| ENSMUSG000000055065  | Ddx17         |    | 67040     | yellow       |
| ENSMUSG000000026941  | Mamdc4        |    | 381352    | turquoise    |
| ENSMUSG000000055067  | NA            | NA |           | turquoise    |
| ENSMUSG000000026942  | Traf2         |    | 22030     | green        |
| ENSMUSG000000033671  | Cep350        |    | 74081     | turquoise    |
| ENSMUSG000000026944  | Abca2         |    | 11305     | turquoise    |
| ENSMUSG000000044600  | Smim7         |    | 66818     | green        |
| ENSMUSG000000026946  | Nmi           |    | 64685     | blue         |
| ENSMUSG000000033676  | Gabbr3        |    | 14402     | turquoise    |
| ENSMUSG000000061848  | NA            | NA |           | black        |
| ENSMUSG000000051335  | Gfod1         |    | 328232    | turquoise    |
| ENSMUSG000000023169  | Slc38a1       |    | 105727    | red          |
| ENSMUSG000000044609  | NA            | NA |           | tan          |
| ENSMUSG00000001773   | Folh1         |    | 53320     | yellow       |
| ENSMUSG00000001774   | Chordc1       |    | 66917     | blue         |
| ENSMUSG000000086782  | E130102H24Rik |    | 77866     | turquoise    |
| ENSMUSG000000097711  | Gm5523        |    | 433273    | greenyellow  |
| ENSMUSG000000087200  | Lrp8os3       |    | 105244644 | turquoise    |

|                    |               |        |              |
|--------------------|---------------|--------|--------------|
| ENSMUSG00000059033 | NA            | NA     | tan          |
| ENSMUSG00000097715 | NA            | NA     | brown        |
| ENSMUSG00000009470 | Tnpo1         | 238799 | brown        |
| ENSMUSG00000019984 | Med23         | 70208  | turquoise    |
| ENSMUSG00000037640 | NA            | NA     | blue         |
| ENSMUSG00000019986 | Ahi1          | 52906  | midnightblue |
| ENSMUSG00000019988 | Nedd1         | 17997  | magenta      |
| ENSMUSG00000027130 | Slc12a6       | 107723 | turquoise    |
| ENSMUSG00000027131 | Emc4          | 68032  | turquoise    |
| ENSMUSG00000027132 | Katnbl1       | 72425  | cyan         |
| ENSMUSG00000037646 | Vps13b        | 666173 | turquoise    |
| ENSMUSG00000027133 | NA            | NA     | black        |
| ENSMUSG00000055302 | Mrfap1        | 67568  | green        |
| ENSMUSG00000062031 | Athl1         | 212974 | green        |
| ENSMUSG00000044377 | NA            | NA     | turquoise    |
| ENSMUSG00000055305 | NA            | NA     | pink         |
| ENSMUSG00000022982 | Sod1          | 20655  | turquoise    |
| ENSMUSG00000022983 | Scaf4         | 224432 | turquoise    |
| ENSMUSG00000062038 | NA            | NA     | blue         |
| ENSMUSG00000022987 | Zfp641        | 239652 | purple       |
| ENSMUSG00000033916 | Chmp2a        | 68953  | green        |
| ENSMUSG00000033917 | Gde1          | 56209  | turquoise    |
| ENSMUSG00000033918 | Parl          | 381038 | lightcyan    |
| ENSMUSG00000040648 | Ppip5k2       | 227399 | yellow       |
| ENSMUSG00000040649 | Rimklb        | 108653 | yellow       |
| ENSMUSG00000030138 | Bms1          | 213895 | turquoise    |
| ENSMUSG00000097487 | Ptges3l       | 73635  | cyan         |
| ENSMUSG00000083240 | NA            | NA     | midnightblue |
| ENSMUSG00000026950 | Neb           | 17996  | turquoise    |
| ENSMUSG00000083245 | NA            | NA     | greenyellow  |
| ENSMUSG00000023170 | Gps2          | 56310  | blue         |
| ENSMUSG00000033684 | Qsox1         | 104009 | turquoise    |
| ENSMUSG00000026958 | Dpp7          | 83768  | yellow       |
| ENSMUSG00000034101 | Ctnnd1        | 12388  | turquoise    |
| ENSMUSG00000023175 | Bsg           | 12215  | brown        |
| ENSMUSG00000051343 | Rab11fip5     | 52055  | turquoise    |
| ENSMUSG00000051344 | Plekhm3       | 241075 | turquoise    |
| ENSMUSG00000034105 | Tlhc1         | 74347  | turquoise    |
| ENSMUSG00000051346 | Spryd4        | 66701  | brown        |
| ENSMUSG00000001783 | Rtcb          | 28088  | midnightblue |
| ENSMUSG00000034108 | Ccs           | 12460  | turquoise    |
| ENSMUSG00000001785 | Pwp1          | 103136 | blue         |
| ENSMUSG00000034109 | Golim4        | 73124  | blue         |
| ENSMUSG00000001786 | Fbxo7         | 69754  | brown        |
| ENSMUSG00000002205 | Vrk3          | 101568 | turquoise    |
| ENSMUSG00000059040 | Eno1b         | 433182 | purple       |
| ENSMUSG00000076281 | NA            | NA     | turquoise    |
| ENSMUSG00000097723 | NA            | NA     | cyan         |
| ENSMUSG00000097729 | 2310015A10Rik | 69548  | turquoise    |
| ENSMUSG00000019996 | Map7          | 17761  | turquoise    |
| ENSMUSG00000037652 | Phc3          | 241915 | yellow       |
| ENSMUSG00000059049 | Frem1         | 329872 | turquoise    |
| ENSMUSG00000054894 | Atp5s         | 68055  | turquoise    |
| ENSMUSG00000019998 | Stx7          | 53331  | greenyellow  |

|                    |          |        |              |
|--------------------|----------|--------|--------------|
| ENSMUSG00000037656 | Slc20a2  | 20516  | turquoise    |
| ENSMUSG00000062040 | Zfp27    | 22689  | blue         |
| ENSMUSG00000022992 | NA       | NA     | blue         |
| ENSMUSG00000090213 | NA       | NA     | yellow       |
| ENSMUSG00000022994 | Adcy6    | 11512  | brown        |
| ENSMUSG00000055319 | Sec23ip  | 207352 | blue         |
| ENSMUSG00000022995 | Enah     | 13800  | turquoise    |
| ENSMUSG00000090216 | NA       | NA     | turquoise    |
| ENSMUSG00000040651 | Fam208a  | 218850 | brown        |
| ENSMUSG00000012483 | Rpa3     | 68240  | red          |
| ENSMUSG00000040652 | Oaz2     | 18247  | yellow       |
| ENSMUSG00000040653 | Ppp1r14c | 76142  | turquoise    |
| ENSMUSG00000022999 | Lmbr1l   | 74775  | blue         |
| ENSMUSG00000030145 | Zfp248   | 72720  | blue         |
| ENSMUSG00000040659 | Efhd2    | 27984  | blue         |
| ENSMUSG00000106375 | NA       | NA     | turquoise    |
| ENSMUSG00000048351 | NA       | NA     | blue         |
| ENSMUSG00000065593 | Mir339   | 723898 | yellow       |
| ENSMUSG00000026960 | Arl6ip6  | 65103  | brown        |
| ENSMUSG00000083253 | NA       | NA     | turquoise    |
| ENSMUSG00000083257 | NA       | NA     | turquoise    |
| ENSMUSG00000026965 | Anapc2   | 99152  | brown        |
| ENSMUSG00000083258 | NA       | NA     | blue         |
| ENSMUSG00000026966 | Ssna1    | 68475  | black        |
| ENSMUSG00000061863 | NA       | NA     | yellow       |
| ENSMUSG00000034110 | Kctd7    | 212919 | turquoise    |
| ENSMUSG00000051351 | Zfp46    | 22704  | brown        |
| ENSMUSG00000033697 | Arhgap39 | 223666 | turquoise    |
| ENSMUSG00000023186 | Vwa5a    | 67776  | turquoise    |
| ENSMUSG00000051355 | NA       | NA     | black        |
| ENSMUSG00000044627 | Swi5     | 72931  | midnightblue |
| ENSMUSG00000044628 | Rnf208   | 68846  | green        |
| ENSMUSG00000044629 | Cnrip1   | 380686 | yellow       |
| ENSMUSG00000051359 | Ncald    | 52589  | red          |
| ENSMUSG00000001794 | Capns1   | 12336  | turquoise    |
| ENSMUSG00000034118 | Tpst1    | 22021  | green        |
| ENSMUSG00000002210 | Smg9     | 71997  | pink         |
| ENSMUSG00000069565 | Dazap1   | 70248  | red          |
| ENSMUSG00000087221 | NA       | NA     | turquoise    |
| ENSMUSG00000059058 | NA       | NA     | turquoise    |
| ENSMUSG00000044390 | Tigd3    | 332359 | blue         |
| ENSMUSG00000055320 | Tead1    | 21676  | greenyellow  |
| ENSMUSG00000037669 | Ldah     | 68832  | brown        |
| ENSMUSG00000090224 | NA       | NA     | yellow       |
| ENSMUSG00000033931 | Rbm34    | 52202  | blue         |
| ENSMUSG00000040661 | Rad54l2  | 81000  | grey60       |
| ENSMUSG00000033933 | Vhl      | 22346  | turquoise    |
| ENSMUSG00000033938 | Ndufb7   | 66916  | brown        |
| ENSMUSG00000040667 | Nup88    | 19069  | red          |
| ENSMUSG00000040669 | Phc1     | 13619  | green        |
| ENSMUSG00000106383 | NA       | NA     | grey60       |
| ENSMUSG00000106384 | NA       | NA     | turquoise    |
| ENSMUSG00000106386 | NA       | NA     | turquoise    |
| ENSMUSG00000058873 | NA       | NA     | red          |

|                    |              |        |              |
|--------------------|--------------|--------|--------------|
| ENSMUSG00000055093 | NA           | NA     | black        |
| ENSMUSG00000083261 | NA           | NA     | blue         |
| ENSMUSG00000026970 | Rbms1        | 56878  | yellow       |
| ENSMUSG00000102653 | NA           | NA     | turquoise    |
| ENSMUSG00000026972 | Arrdc1       | 215705 | turquoise    |
| ENSMUSG00000009733 | Tfcp2        | 21422  | brown        |
| ENSMUSG00000026974 | NA           | NA     | blue         |
| ENSMUSG00000066026 | Dhrs3        | 20148  | yellow       |
| ENSMUSG00000037902 | Sirpa        | 19261  | red          |
| ENSMUSG00000026975 | Dph7         | 67228  | turquoise    |
| ENSMUSG00000023191 | P3h3         | 14789  | turquoise    |
| ENSMUSG00000037904 | Ankrd9       | 74251  | yellow       |
| ENSMUSG00000102659 | NA           | NA     | turquoise    |
| ENSMUSG00000026977 | 6-Mar        | 57438  | brown        |
| ENSMUSG00000034120 | Srsf2        | 20382  | green        |
| ENSMUSG00000037905 | Bri3bp       | 76809  | blue         |
| ENSMUSG00000034121 | Mks1         | 380718 | turquoise    |
| ENSMUSG00000009739 | NA           | NA     | turquoise    |
| ENSMUSG00000037907 | Ankrd13b     | 268445 | brown        |
| ENSMUSG00000044636 | Csrnp2       | 207785 | blue         |
| ENSMUSG00000034126 | Pomt2        | 217734 | turquoise    |
| ENSMUSG00000002221 | Paxip1       | 55982  | brown        |
| ENSMUSG00000002222 | Rmnd5a       | 68477  | yellow       |
| ENSMUSG00000002227 | Mov10        | 17454  | green        |
| ENSMUSG00000097743 | NA           | NA     | blue         |
| ENSMUSG00000087231 | E230016M11Ri | 320172 | greenyellow  |
| ENSMUSG00000059064 | NA           | NA     | tan          |
| ENSMUSG00000097747 | NA           | NA     | blue         |
| ENSMUSG00000087235 | NA           | NA     | tan          |
| ENSMUSG00000027160 | Ccdc34       | 68201  | blue         |
| ENSMUSG00000037674 | Rfx7         | 319758 | blue         |
| ENSMUSG00000027162 | Lin7c        | 22343  | blue         |
| ENSMUSG00000027163 | Commd9       | 76501  | turquoise    |
| ENSMUSG00000027164 | Traf6        | 22034  | blue         |
| ENSMUSG00000083500 | NA           | NA     | turquoise    |
| ENSMUSG00000027165 | B230118H07Ri | 68170  | turquoise    |
| ENSMUSG00000055334 | Snupn        | 66069  | turquoise    |
| ENSMUSG00000027166 | Dnajc24      | 99349  | blue         |
| ENSMUSG00000027167 | NA           | NA     | green        |
| ENSMUSG00000072576 | NA           | NA     | turquoise    |
| ENSMUSG00000027168 | Pax6         | 18508  | turquoise    |
| ENSMUSG00000033940 | Brk1         | 101314 | green        |
| ENSMUSG00000005774 | Rfx5         | 53970  | brown        |
| ENSMUSG00000033943 | Mga          | 29808  | blue         |
| ENSMUSG00000030161 | Gabarapl1    | 57436  | turquoise    |
| ENSMUSG00000005779 | Psmb4        | 19172  | midnightblue |
| ENSMUSG00000033948 | Zswim5       | 74464  | yellow       |
| ENSMUSG00000030166 | Rad52        | 19365  | turquoise    |
| ENSMUSG00000030168 | Adipor2      | 68465  | turquoise    |
| ENSMUSG00000106390 | NA           | NA     | brown        |
| ENSMUSG00000106392 | NA           | NA     | pink         |
| ENSMUSG00000058881 | Zfp516       | 329003 | blue         |
| ENSMUSG00000106395 | NA           | NA     | pink         |
| ENSMUSG00000048371 | Pdp2         | 382051 | yellow       |

|                    |          |           |           |
|--------------------|----------|-----------|-----------|
| ENSMUSG00000058886 | Deaf1    | 54006     | blue      |
| ENSMUSG00000059301 | Gm5434   | 432649    | turquoise |
| ENSMUSG00000009741 | Ubp1     | 22221     | blue      |
| ENSMUSG00000048379 | NA       | NA        | turquoise |
| ENSMUSG00000066036 | Ubr4     | 69116     | turquoise |
| ENSMUSG00000066037 | Hnrnpr   | 74326     | black     |
| ENSMUSG00000061882 | Ccdc62   | 208908    | turquoise |
| ENSMUSG00000026986 | Hnmt     | 140483    | blue      |
| ENSMUSG00000083279 | NA       | NA        | turquoise |
| ENSMUSG00000026987 | Baz2b    | 407823    | blue      |
| ENSMUSG00000026988 | Wdsub1   | 72137     | turquoise |
| ENSMUSG00000037916 | Ndufv1   | 17995     | black     |
| ENSMUSG00000016477 | E2f3     | 13557     | blue      |
| ENSMUSG00000027404 | Snrpb    | 20638     | black     |
| ENSMUSG00000051373 | Plpp7    | 227721    | brown     |
| ENSMUSG00000062300 | Pvrl2    | 19294     | turquoise |
| ENSMUSG00000027405 | Nop56    | 67134     | red       |
| ENSMUSG00000061887 | Ssbp3    | 72475     | turquoise |
| ENSMUSG00000051375 | Pcdh1    | 75599     | purple    |
| ENSMUSG00000027406 | Idh3b    | 170718    | turquoise |
| ENSMUSG00000034135 | Sik3     | 70661     | turquoise |
| ENSMUSG00000027408 | Cpxm1    | 56264     | turquoise |
| ENSMUSG00000051378 | Kif18b   | 70218     | magenta   |
| ENSMUSG00000030400 | Erc2     | 13871     | turquoise |
| ENSMUSG00000002233 | Rhoc     | 11853     | turquoise |
| ENSMUSG00000030403 | Vasp     | 22323     | turquoise |
| ENSMUSG00000040918 | Slc19a2  | 116914    | blue      |
| ENSMUSG00000097750 | NA       | NA        | turquoise |
| ENSMUSG00000030407 | Qpctl    | 67369     | pink      |
| ENSMUSG00000059070 | Rpl18    | 19899     | black     |
| ENSMUSG00000030409 | Dmpk     | 13400     | turquoise |
| ENSMUSG00000027170 | Eif3m    | 98221     | black     |
| ENSMUSG00000087249 | Gm16062  | 100504104 | yellow    |
| ENSMUSG00000037685 | Atp8a1   | 11980     | green     |
| ENSMUSG00000072582 | Pthr2    | 217057    | black     |
| ENSMUSG00000062070 | Pgk1     | 18655     | blue      |
| ENSMUSG00000038102 | Trappc11 | 320714    | brown     |
| ENSMUSG00000027175 | Tcp1111  | 320554    | salmon    |
| ENSMUSG00000027176 | Cstf3    | 228410    | brown     |
| ENSMUSG00000083512 | NA       | NA        | turquoise |
| ENSMUSG00000027177 | Hipk3    | 15259     | turquoise |
| ENSMUSG00000062075 | Lmnb2    | 16907     | red       |
| ENSMUSG00000090243 | NA       | NA        | pink      |
| ENSMUSG00000033952 | Aspm     | 12316     | magenta   |
| ENSMUSG00000062078 | Qk       | 19317     | turquoise |
| ENSMUSG00000040681 | NA       | NA        | purple    |
| ENSMUSG00000033953 | Ppp3r1   | 19058     | turquoise |
| ENSMUSG00000083518 | NA       | NA        | pink      |
| ENSMUSG00000090247 | Bloc1s1  | 14533     | turquoise |
| ENSMUSG00000102908 | NA       | NA        | pink      |
| ENSMUSG00000033955 | Tnks1bp1 | 228140    | turquoise |
| ENSMUSG00000030172 | Erc1     | 111173    | turquoise |
| ENSMUSG00000006205 | Htra1    | 56213     | red       |
| ENSMUSG00000040687 | Madd     | 228355    | turquoise |



|                    |               |           |              |
|--------------------|---------------|-----------|--------------|
| ENSMUSG00000040688 | NA            | NA        | green        |
| ENSMUSG00000051615 | Rap2a         | 76108     | turquoise    |
| ENSMUSG00000030177 | Ccdc77        | 67200     | green        |
| ENSMUSG00000083280 | NA            | NA        | turquoise    |
| ENSMUSG00000093793 | NA            | NA        | turquoise    |
| ENSMUSG00000083281 | NA            | NA        | turquoise    |
| ENSMUSG00000083282 | Ctsf          | 56464     | black        |
| ENSMUSG00000066042 | Med18         | 67219     | blue         |
| ENSMUSG00000083283 | NA            | NA        | green        |
| ENSMUSG00000048388 | Fam171b       | 241520    | turquoise    |
| ENSMUSG00000026991 | Pkp4          | 227937    | blue         |
| ENSMUSG00000066043 | Phactr4       | 100169    | brown        |
| ENSMUSG00000083284 | NA            | NA        | salmon       |
| ENSMUSG00000093798 | NA            | NA        | green        |
| ENSMUSG00000059316 | Slc27a4       | 26569     | turquoise    |
| ENSMUSG00000016481 | Cr1l          | 12946     | brown        |
| ENSMUSG00000083287 | NA            | NA        | turquoise    |
| ENSMUSG00000027411 | Vps16         | 80743     | turquoise    |
| ENSMUSG00000037926 | Ssh2          | 237860    | red          |
| ENSMUSG00000026999 | NA            | NA        | blue         |
| ENSMUSG00000016487 | Ppfibp1       | 67533     | lightcyan    |
| ENSMUSG00000061897 | NA            | NA        | turquoise    |
| ENSMUSG00000072825 | Cep170b       | 217882    | turquoise    |
| ENSMUSG00000061898 | Rbak          | 57782     | cyan         |
| ENSMUSG00000030410 | Dmwd          | 13401     | brown        |
| ENSMUSG00000030411 | Nova2         | 384569    | blue         |
| ENSMUSG00000040928 | S100pbb       | 74648     | turquoise    |
| ENSMUSG00000040929 | Rfx3          | 19726     | turquoise    |
| ENSMUSG00000097760 | NA            | NA        | turquoise    |
| ENSMUSG00000030417 | Pdcd5         | 56330     | green        |
| ENSMUSG00000087253 | NA            | NA        | greenyellow  |
| ENSMUSG00000097767 | Miat          | 330166    | red          |
| ENSMUSG00000097769 | Snhg4         | 100503380 | turquoise    |
| ENSMUSG00000037692 | Ahdc1         | 230793    | turquoise    |
| ENSMUSG00000027180 | Fbxo3         | 57443     | midnightblue |
| ENSMUSG00000087259 | 2610035D17Rik | 72386     | yellow       |
| ENSMUSG00000037697 | Ddhd1         | 114874    | purple       |
| ENSMUSG00000027184 | Caprin1       | 53872     | black        |
| ENSMUSG00000083520 | NA            | NA        | turquoise    |
| ENSMUSG00000062081 | NA            | NA        | turquoise    |
| ENSMUSG00000072594 | NA            | NA        | yellow       |
| ENSMUSG00000027185 | Nat10         | 98956     | lightcyan    |
| ENSMUSG00000062083 | NA            | NA        | tan          |
| ENSMUSG00000027187 | Cat           | 12359     | turquoise    |
| ENSMUSG00000027189 | Trim44        | 80985     | turquoise    |
| ENSMUSG00000038116 | Phf20         | 228829    | lightcyan    |
| ENSMUSG00000033961 | NA            | NA        | turquoise    |
| ENSMUSG00000040690 | Col16a1       | 107581    | blue         |
| ENSMUSG00000038119 | Cdon          | 57810     | brown        |
| ENSMUSG00000102918 | Pcdhgc3       | 93706     | greenyellow  |
| ENSMUSG00000033964 | Zbtb41        | 226470    | green        |
| ENSMUSG00000090258 | Churc1        | 211151    | turquoise    |
| ENSMUSG00000033965 | Slc16a2       | 20502     | yellow       |
| ENSMUSG00000023452 | Pisd          | 320951    | turquoise    |

|                     |               |           |        |           |
|---------------------|---------------|-----------|--------|-----------|
| ENSMUSG00000030180  | Kdm5a         |           | 214899 | blue      |
| ENSMUSG00000040697  | NA            | NA        |        | turquoise |
| ENSMUSG00000006215  | Zbtb17        |           | 22642  | blue      |
| ENSMUSG00000023456  | Tpi1          |           | 21991  | yellow    |
| ENSMUSG00000040699  | Limd2         |           | 67803  | blue      |
| ENSMUSG000000051627 | Hist1h1e      |           | 50709  | blue      |
| ENSMUSG00000030188  | Magohb        |           | 66441  | red       |
| ENSMUSG00000030189  | Ybx3          |           | 56449  | green     |
| ENSMUSG00000041119  | Pde9a         |           | 18585  | yellow    |
| ENSMUSG000000069835 | Sat2          |           | 69215  | turquoise |
| ENSMUSG000000083291 | NA            | NA        |        | tan       |
| ENSMUSG000000059323 | Vps28         |           | 66914  | green     |
| ENSMUSG000000059326 | Csf2ra        |           | 12982  | brown     |
| ENSMUSG000000102687 | NA            | NA        |        | blue      |
| ENSMUSG000000037933 | Bicd2         |           | 76895  | turquoise |
| ENSMUSG00000016493  | NA            | NA        |        | turquoise |
| ENSMUSG00000016495  | Plgrkt        |           | 67759  | blue      |
| ENSMUSG000000037935 | Smarce1       |           | 57376  | red       |
| ENSMUSG000000027422 | Rrbp1         |           | 81910  | blue      |
| ENSMUSG000000051391 | Ywhag         |           | 22628  | blue      |
| ENSMUSG00000016496  | Cd274         |           | 60533  | turquoise |
| ENSMUSG000000027423 | Snx5          |           | 69178  | yellow    |
| ENSMUSG000000037936 | Scarb1        |           | 20778  | turquoise |
| ENSMUSG000000034152 | Exoc3         |           | 211446 | red       |
| ENSMUSG000000027424 | Mgme1         |           | 74528  | blue      |
| ENSMUSG000000027425 | Csrp2bp       |           | 228714 | brown     |
| ENSMUSG000000037938 | Chchd5        |           | 66170  | green     |
| ENSMUSG000000034154 | Ino80         |           | 68142  | turquoise |
| ENSMUSG000000027427 | Polr3f        |           | 70408  | blue      |
| ENSMUSG000000051396 | Hspa14        |           | 50497  | blue      |
| ENSMUSG000000034156 | Bzap1         |           | 207777 | yellow    |
| ENSMUSG000000027428 | Rbbp9         |           | 26450  | turquoise |
| ENSMUSG000000034157 | Cipc          |           | 217732 | yellow    |
| ENSMUSG000000027429 | Sec23b        |           | 27054  | green     |
| ENSMUSG000000034158 | Lrrc58        |           | 320184 | turquoise |
| ENSMUSG000000062328 | Rpl17         |           | 319195 | black     |
| ENSMUSG00000002250  | Ppard         |           | 19015  | pink      |
| ENSMUSG000000030421 | Uri1          |           | 19777  | blue      |
| ENSMUSG000000040936 | Ulk4          |           | 209012 | pink      |
| ENSMUSG000000030423 | Pop4          |           | 66161  | blue      |
| ENSMUSG000000097772 | 5430416N02Rik | 100503199 |        | red       |
| ENSMUSG000000030428 | Ttyh1         |           | 57776  | red       |
| ENSMUSG000000087260 | Lamtor5       |           | 68576  | brown     |
| ENSMUSG000000097777 | Gm16794       | 100504734 |        | turquoise |
| ENSMUSG000000087269 | NA            | NA        |        | turquoise |
| ENSMUSG000000027193 | Api5          |           | 11800  | black     |
| ENSMUSG000000038121 | Fam210a       |           | 108654 | turquoise |
| ENSMUSG000000027194 | Ttc17         |           | 74569  | turquoise |
| ENSMUSG000000038122 | Tbc1d32       |           | 544696 | brown     |
| ENSMUSG000000027195 | Hsd17b12      |           | 56348  | turquoise |
| ENSMUSG000000062093 | NA            | NA        |        | turquoise |
| ENSMUSG000000027198 | Ext2          |           | 14043  | blue      |
| ENSMUSG000000027199 | Gatm          |           | 67092  | yellow    |
| ENSMUSG000000038126 | Mphosph9      |           | 269702 | blue      |

|                    |         |        |           |
|--------------------|---------|--------|-----------|
| ENSMUSG00000033970 | Rfc3    | 69263  | salmon    |
| ENSMUSG00000038127 | Ccdc50  | 67501  | turquoise |
| ENSMUSG00000083536 | NA      | NA     | lightcyan |
| ENSMUSG00000033972 | Zfp944  | 319615 | turquoise |
| ENSMUSG00000023460 | Rab12   | 19328  | turquoise |
| ENSMUSG00000090266 | Mettl23 | 74319  | blue      |
| ENSMUSG00000062098 | Btbd3   | 228662 | turquoise |
| ENSMUSG00000041120 | Nbl1    | 17965  | red       |
| ENSMUSG00000041124 | Msantd4 | 78100  | brown     |
| ENSMUSG00000041126 | H2afv   | 77605  | black     |
| ENSMUSG00000030199 | Etv6    | 14011  | blue      |
| ENSMUSG00000069844 | NA      | NA     | lightcyan |
| ENSMUSG00000059336 | Slc14a1 | 108052 | purple    |
| ENSMUSG00000027430 | Dtd1    | 66044  | blue      |
| ENSMUSG00000066068 | NA      | NA     | brown     |
| ENSMUSG00000034160 | Ogt     | 108155 | turquoise |
| ENSMUSG00000027433 | Xrn2    | 24128  | green     |
| ENSMUSG00000044674 | Fzd1    | 14362  | turquoise |
| ENSMUSG00000103115 | NA      | NA     | turquoise |
| ENSMUSG00000027434 | Nkx2-2  | 18088  | turquoise |
| ENSMUSG00000044676 | NA      | NA     | turquoise |
| ENSMUSG00000034163 | Zfc3h1  | 216345 | turquoise |
| ENSMUSG00000034164 | Emid1   | 140703 | turquoise |
| ENSMUSG00000037949 | Ano10   | 102566 | turquoise |
| ENSMUSG00000034165 | Ccnd3   | 12445  | blue      |
| ENSMUSG00000072847 | NA      | NA     | blue      |
| ENSMUSG00000027438 | Napb    | 17957  | turquoise |
| ENSMUSG00000027439 | Gzf1    | 74533  | turquoise |
| ENSMUSG00000034168 | Irf2bpl | 238330 | turquoise |
| ENSMUSG00000040940 | Arhgef1 | 16801  | turquoise |
| ENSMUSG00000040943 | Tet2    | 214133 | turquoise |
| ENSMUSG00000030431 | NA      | NA     | turquoise |
| ENSMUSG00000030432 | Rpl28   | 19943  | black     |
| ENSMUSG00000040945 | Rcc2    | 108911 | red       |
| ENSMUSG00000002265 | NA      | NA     | turquoise |
| ENSMUSG00000002266 | Zim1    | 22776  | yellow    |
| ENSMUSG00000023707 | Ogfod2  | 66627  | turquoise |
| ENSMUSG00000030435 | U2af2   | 22185  | pink      |
| ENSMUSG00000087270 | NA      | NA     | cyan      |
| ENSMUSG00000098201 | NA      | NA     | pink      |
| ENSMUSG00000106664 | NA      | NA     | yellow    |
| ENSMUSG00000098203 | NA      | NA     | yellow    |
| ENSMUSG00000055370 | NA      | NA     | turquoise |
| ENSMUSG00000055371 | Stam2   | 56324  | blue      |
| ENSMUSG00000098208 | NA      | NA     | turquoise |
| ENSMUSG00000048644 | Ctxn1   | 330695 | yellow    |
| ENSMUSG00000055373 | Fut9    | 14348  | turquoise |
| ENSMUSG00000048647 | Exd1    | 241624 | turquoise |
| ENSMUSG00000033981 | NA      | NA     | yellow    |
| ENSMUSG00000066306 | Numa1   | 101706 | brown     |
| ENSMUSG00000033983 | Coil    | 12812  | green     |
| ENSMUSG00000033985 | Tesk2   | 230661 | turquoise |
| ENSMUSG00000023473 | Celsr3  | 107934 | turquoise |
| ENSMUSG00000034401 | Spata6  | 67946  | turquoise |

|                    |               |           |             |
|--------------------|---------------|-----------|-------------|
| ENSMUSG00000034402 | Kcnh5         | 238271    | pink        |
| ENSMUSG00000034403 | Pja1          | 18744     | green       |
| ENSMUSG00000044916 | 1700029I15Rik | 75641     | brown       |
| ENSMUSG00000041133 | Smc1a         | 24061     | blue        |
| ENSMUSG00000041135 | Ripk2         | 192656    | turquoise   |
| ENSMUSG00000059343 | Aldoart1      | 353204    | greenyellow |
| ENSMUSG00000094242 | NA            | NA        | yellow      |
| ENSMUSG00000094248 | NA            | NA        | magenta     |
| ENSMUSG00000094249 | NA            | NA        | blue        |
| ENSMUSG00000037957 | Wdr20         | 69641     | turquoise   |
| ENSMUSG00000055612 | Cdca7         | 66953     | black       |
| ENSMUSG00000037958 | Nsrp1         | 237859    | blue        |
| ENSMUSG00000034173 | Zbed5         | 71970     | turquoise   |
| ENSMUSG00000045100 | Slc25a26      | 67582     | turquoise   |
| ENSMUSG00000034175 | Rhbdd3        | 279766    | turquoise   |
| ENSMUSG00000027447 | Cst3          | 13010     | red         |
| ENSMUSG00000045103 | Dmd           | 13405     | purple      |
| ENSMUSG00000045104 | NA            | NA        | greenyellow |
| ENSMUSG00000080002 | NA            | NA        | black       |
| ENSMUSG00000045106 | Ccdc73        | 211936    | turquoise   |
| ENSMUSG00000090516 | NA            | NA        | green       |
| ENSMUSG00000045107 | Saysd1        | 67509     | blue        |
| ENSMUSG00000040952 | Rps19         | 20085     | black       |
| ENSMUSG00000080006 | NA            | NA        | tan         |
| ENSMUSG00000002274 | Metrn         | 70083     | yellow      |
| ENSMUSG00000030446 | Zfp273        | 212569    | turquoise   |
| ENSMUSG00000097790 | NA            | NA        | turquoise   |
| ENSMUSG00000002279 | Lmf1          | 76483     | turquoise   |
| ENSMUSG00000030447 | Cyfp1         | 20430     | turquoise   |
| ENSMUSG00000098210 | NA            | NA        | blue        |
| ENSMUSG00000097796 | Gm16702       | 100504601 | blue        |
| ENSMUSG00000038141 | Tmem181a      | 77106     | blue        |
| ENSMUSG00000038143 | Stox2         | 71069     | blue        |
| ENSMUSG00000083553 | NA            | NA        | yellow      |
| ENSMUSG00000038145 | Snrk          | 20623     | turquoise   |
| ENSMUSG00000083554 | NA            | NA        | turquoise   |
| ENSMUSG00000083555 | NA            | NA        | tan         |
| ENSMUSG00000033991 | Ttc37         | 218343    | brown       |
| ENSMUSG00000066315 | NA            | NA        | black       |
| ENSMUSG00000083557 | NA            | NA        | blue        |
| ENSMUSG00000006241 | Ccdc159       | 67119     | yellow      |
| ENSMUSG00000016757 | Ttl12         | 223723    | blue        |
| ENSMUSG00000034412 | Tbc1d10a      | 103724    | turquoise   |
| ENSMUSG00000033998 | Kcnk1         | 16525     | purple      |
| ENSMUSG00000044927 | H1fx          | 243529    | magenta     |
| ENSMUSG00000041143 | Tmco4         | 77056     | yellow      |
| ENSMUSG00000041144 | Dnah7b        | 227058    | turquoise   |
| ENSMUSG00000041147 | Brca2         | 12190     | salmon      |
| ENSMUSG00000069862 | NA            | NA        | turquoise   |
| ENSMUSG00000094250 | NA            | NA        | tan         |
| ENSMUSG00000087523 | NA            | NA        | blue        |
| ENSMUSG00000059355 | Wdr83os       | 414077    | black       |
| ENSMUSG00000094256 | NA            | NA        | turquoise   |
| ENSMUSG00000087528 | NA            | NA        | yellow      |

|                    |               |           |              |
|--------------------|---------------|-----------|--------------|
| ENSMUSG00000106917 | NA            | NA        | brown        |
| ENSMUSG00000094257 | NA            | NA        | turquoise    |
| ENSMUSG00000106918 | Mrpl33        | 66845     | black        |
| ENSMUSG00000037965 | Zc3h7a        | 106205    | turquoise    |
| ENSMUSG00000027452 | Acss1         | 68738     | blue         |
| ENSMUSG00000037966 | Ninj1         | 18081     | turquoise    |
| ENSMUSG00000027455 | Nsf11c        | 386649    | blue         |
| ENSMUSG00000103137 | NA            | NA        | turquoise    |
| ENSMUSG00000103138 | NA            | NA        | brown        |
| ENSMUSG00000044697 | NA            | NA        | turquoise    |
| ENSMUSG00000062352 | Itgb1bp1      | 16413     | blue         |
| ENSMUSG00000062353 | Gm15772       | 100034726 | black        |
| ENSMUSG00000090523 | Gypc          | 71683     | cyan         |
| ENSMUSG00000034187 | Nsf           | 18195     | blue         |
| ENSMUSG00000045114 | Prrt2         | 69017     | turquoise    |
| ENSMUSG00000027459 | Fam110a       | 73847     | red          |
| ENSMUSG00000034189 | Hsd1l         | 72552     | blue         |
| ENSMUSG00000002280 | Narfl         | 67563     | turquoise    |
| ENSMUSG00000023723 | Mrps23        | 64656     | lightcyan    |
| ENSMUSG00000030451 | Herc2         | 15204     | turquoise    |
| ENSMUSG00000040964 | Arhgef10l     | 72754     | turquoise    |
| ENSMUSG00000030452 | Nipa2         | 93790     | brown        |
| ENSMUSG00000106682 | NA            | NA        | brown        |
| ENSMUSG00000106683 | NA            | NA        | blue         |
| ENSMUSG00000098222 | NA            | NA        | greenyellow  |
| ENSMUSG00000098224 | NA            | NA        | greenyellow  |
| ENSMUSG00000087298 | NA            | NA        | lightcyan    |
| ENSMUSG00000048661 | Lemd3         | 380664    | brown        |
| ENSMUSG00000107102 | NA            | NA        | brown        |
| ENSMUSG00000038150 | Ormdl3        | 66612     | blue         |
| ENSMUSG00000083563 | NA            | NA        | yellow       |
| ENSMUSG00000048668 | Rhno1         | 72440     | red          |
| ENSMUSG00000038156 | Spon1         | 233744    | purple       |
| ENSMUSG00000066324 | NA            | NA        | turquoise    |
| ENSMUSG00000083567 | NA            | NA        | turquoise    |
| ENSMUSG00000083569 | NA            | NA        | tan          |
| ENSMUSG00000044934 | Zfp367        | 238673    | magenta      |
| ENSMUSG00000023495 | Pcbp4         | 59092     | blue         |
| ENSMUSG00000034424 | Gcsh          | 68133     | brown        |
| ENSMUSG00000041153 | Osgin2        | 209212    | turquoise    |
| ENSMUSG00000034429 | Zfp707        | 69020     | turquoise    |
| ENSMUSG00000002524 | Puf60         | 67959     | brown        |
| ENSMUSG00000059363 | Fxn           | 14297     | midnightblue |
| ENSMUSG00000106920 | NA            | NA        | pink         |
| ENSMUSG00000037971 | 1110032A03Rik | 68721     | turquoise    |
| ENSMUSG00000106925 | NA            | NA        | turquoise    |
| ENSMUSG00000037972 | Snn           | 20621     | blue         |
| ENSMUSG00000106926 | NA            | NA        | black        |
| ENSMUSG00000034190 | Chmp7         | 105513    | green        |
| ENSMUSG00000034192 | Lsm3          | 67678     | red          |
| ENSMUSG00000027465 | NA            | NA        | green        |
| ENSMUSG00000034194 | R3hcc1        | 71843     | lightcyan    |
| ENSMUSG00000027466 | Rbck1         | 24105     | blue         |
| ENSMUSG00000027469 | Tpx2          | 72119     | magenta      |

|                    |         |        |           |
|--------------------|---------|--------|-----------|
| ENSMUSG00000080021 | NA      | NA     | turquoise |
| ENSMUSG00000055639 | Dach1   | 13134  | lightcyan |
| ENSMUSG00000045128 | Rpl18a  | 76808  | black     |
| ENSMUSG00000040972 | Igsf21  | 230868 | brown     |
| ENSMUSG00000030465 | Psd3    | 234353 | turquoise |
| ENSMUSG00000030469 | Zfp719  | 210105 | brown     |
| ENSMUSG00000098232 | NA      | NA     | turquoise |
| ENSMUSG00000098234 | Snhg6   | 73824  | black     |
| ENSMUSG00000106696 | NA      | NA     | pink      |
| ENSMUSG00000098238 | NA      | NA     | brown     |
| ENSMUSG00000038160 | Atg5    | 11793  | blue      |
| ENSMUSG00000048677 | Tpcn2   | 233979 | yellow    |
| ENSMUSG00000102964 | NA      | NA     | pink      |
| ENSMUSG00000073062 | Zxdb    | 668166 | turquoise |
| ENSMUSG00000102969 | NA      | NA     | turquoise |
| ENSMUSG00000051671 | Coa6    | 67892  | blue      |
| ENSMUSG00000034430 | Zxdc    | 80292  | turquoise |
| ENSMUSG00000006262 | Mob1b   | 68473  | blue      |
| ENSMUSG00000034432 | Cops8   | 108679 | green     |
| ENSMUSG00000051674 | Dcun1d4 | 100737 | turquoise |
| ENSMUSG00000027706 | Sec62   | 69276  | turquoise |
| ENSMUSG00000051675 | Trim32  | 69807  | turquoise |
| ENSMUSG00000044949 | NA      | NA     | blue      |
| ENSMUSG00000041164 | Zmiz2   | 52915  | green     |
| ENSMUSG00000027708 | Dcun1d1 | 114893 | green     |
| ENSMUSG00000062604 | Srpk2   | 20817  | blue      |
| ENSMUSG00000027709 | Mccc1   | 72039  | brown     |
| ENSMUSG00000034437 | NA      | NA     | red       |
| ENSMUSG00000041168 | Lonp1   | 74142  | blue      |
| ENSMUSG00000030704 | Rab6a   | 19346  | green     |
| ENSMUSG00000030706 | NA      | NA     | turquoise |
| ENSMUSG00000106930 | NA      | NA     | tan       |
| ENSMUSG00000106936 | NA      | NA     | turquoise |
| ENSMUSG00000048911 | Rnf24   | 51902  | yellow    |
| ENSMUSG00000027472 | Pdrg1   | 68559  | blue      |
| ENSMUSG00000038400 | Pmepa1  | 65112  | turquoise |
| ENSMUSG00000048915 | NA      | NA     | turquoise |
| ENSMUSG00000027475 | Kif3b   | 16569  | blue      |
| ENSMUSG00000037989 | Wnk2    | 75607  | yellow    |
| ENSMUSG00000062373 | Tmem65  | 74868  | turquoise |
| ENSMUSG00000083813 | NA      | NA     | turquoise |
| ENSMUSG00000027478 | Dnmt3b  | 13436  | turquoise |
| ENSMUSG00000027479 | Mapre1  | 13589  | blue      |
| ENSMUSG00000038406 | Scaf1   | 233208 | turquoise |
| ENSMUSG00000062376 | Borcs7  | 66439  | blue      |
| ENSMUSG00000090544 | NA      | NA     | lightcyan |
| ENSMUSG00000072889 | Nfxl1   | 100978 | blue      |
| ENSMUSG00000045136 | Tubb2b  | 73710  | turquoise |
| ENSMUSG00000051910 | Sox6    | 20679  | blue      |
| ENSMUSG00000030471 | Zdhhc13 | 243983 | green     |
| ENSMUSG00000013236 | Ptprs   | 19280  | brown     |
| ENSMUSG00000041408 | Wapl    | 218914 | blue      |
| ENSMUSG00000098240 | NA      | NA     | turquoise |
| ENSMUSG00000098243 | NA      | NA     | pink      |

|                    |               |        |           |
|--------------------|---------------|--------|-----------|
| ENSMUSG00000038170 | Pde4dip       | 83679  | turquoise |
| ENSMUSG00000049100 | Pcdh10        | 18526  | turquoise |
| ENSMUSG00000083582 | NA            | NA     | turquoise |
| ENSMUSG00000038174 | Fam126b       | 213056 | yellow    |
| ENSMUSG00000038178 | Slc43a2       | 215113 | turquoise |
| ENSMUSG00000102976 | Zc3h11a       | 70579  | blue      |
| ENSMUSG00000044950 | Pwwp2a        | 70802  | brown     |
| ENSMUSG00000027710 | Acad9         | 229211 | brown     |
| ENSMUSG00000094518 | NA            | NA     | black     |
| ENSMUSG00000027712 | Anxa5         | 11747  | turquoise |
| ENSMUSG00000006273 | Atp6v1b2      | 11966  | blue      |
| ENSMUSG00000034442 | Trmt5         | 76357  | blue      |
| ENSMUSG00000027714 | Exosc9        | 50911  | red       |
| ENSMUSG00000062611 | NA            | NA     | black     |
| ENSMUSG00000027715 | Ccna2         | 12428  | magenta   |
| ENSMUSG00000006276 | Eps15l1       | 13859  | turquoise |
| ENSMUSG00000034445 | NA            | NA     | yellow    |
| ENSMUSG00000052102 | Gnpda1        | 26384  | blue      |
| ENSMUSG00000034449 | Dhrs11        | 192970 | turquoise |
| ENSMUSG00000052105 | Mtcl1         | 68617  | turquoise |
| ENSMUSG00000062619 | 2310039H08Rik | 67101  | brown     |
| ENSMUSG00000002546 | Golga2        | 99412  | blue      |
| ENSMUSG00000020205 | Phlda1        | 21664  | blue      |
| ENSMUSG00000030718 | Ppme1         | 72590  | yellow    |
| ENSMUSG00000069899 | NA            | NA     | yellow    |
| ENSMUSG00000106944 | NA            | NA     | turquoise |
| ENSMUSG00000087557 | NA            | NA     | turquoise |
| ENSMUSG00000106946 | NA            | NA     | brown     |
| ENSMUSG00000048920 | Fkrp          | 243853 | turquoise |
| ENSMUSG00000048921 | NA            | NA     | blue      |
| ENSMUSG00000048922 | Cdca2         | 108912 | magenta   |
| ENSMUSG00000072893 | 4933439C10Rik | 74476  | yellow    |
| ENSMUSG00000062380 | Tubb3         | 22152  | cyan      |
| ENSMUSG00000037997 | Parp11        | 101187 | turquoise |
| ENSMUSG00000083820 | NA            | NA     | brown     |
| ENSMUSG00000055652 | Kihl25        | 207952 | yellow    |
| ENSMUSG00000038412 | Higd1a        | 56295  | turquoise |
| ENSMUSG00000062382 | NA            | NA     | green     |
| ENSMUSG00000037999 | Arap2         | 212285 | turquoise |
| ENSMUSG00000083822 | NA            | NA     | red       |
| ENSMUSG00000027487 | Cdk5rap1      | 66971  | turquoise |
| ENSMUSG00000083823 | NA            | NA     | turquoise |
| ENSMUSG00000027488 | Snta1         | 20648  | turquoise |
| ENSMUSG00000038416 | Cdc16         | 69957  | green     |
| ENSMUSG00000027489 | Necab3        | 56846  | turquoise |
| ENSMUSG00000090553 | Snrpe         | 20643  | black     |
| ENSMUSG00000038417 | Fig4          | 103199 | brown     |
| ENSMUSG00000083826 | NA            | NA     | pink      |
| ENSMUSG00000038418 | NA            | NA     | red       |
| ENSMUSG00000040990 | Sh3kbp1       | 58194  | turquoise |
| ENSMUSG00000083829 | NA            | NA     | turquoise |
| ENSMUSG00000023755 | Rheb11        | 69159  | turquoise |
| ENSMUSG00000040997 | Abhd4         | 105501 | brown     |
| ENSMUSG00000006517 | Mvd           | 192156 | yellow    |

|                    |               |        |             |
|--------------------|---------------|--------|-------------|
| ENSMUSG00000041415 | Dicer1        | 192119 | pink        |
| ENSMUSG00000041417 | Pik3r1        | 18708  | yellow      |
| ENSMUSG00000038180 | Spag4         | 245865 | turquoise   |
| ENSMUSG00000038181 | Chpf2         | 100910 | turquoise   |
| ENSMUSG00000083595 | NA            | NA     | turquoise   |
| ENSMUSG00000038187 | Btbd10        | 68815  | red         |
| ENSMUSG00000083596 | NA            | NA     | tan         |
| ENSMUSG00000066357 | Wdr6          | 83669  | green       |
| ENSMUSG00000027720 | Ii2           | 16183  | turquoise   |
| ENSMUSG00000084013 | NA            | NA     | blue        |
| ENSMUSG00000006281 | Tep1          | 21745  | turquoise   |
| ENSMUSG00000027722 | Spata5        | 57815  | green       |
| ENSMUSG00000049119 | Fam110b       | 242297 | turquoise   |
| ENSMUSG00000017210 | Med24         | 23989  | turquoise   |
| ENSMUSG00000041180 | Hectd2        | 226098 | cyan        |
| ENSMUSG00000034453 | Polr3b        | 70428  | green       |
| ENSMUSG00000051695 | Pcbp1         | 23983  | green       |
| ENSMUSG00000006288 | Ttc5          | 219022 | turquoise   |
| ENSMUSG00000006289 | NA            | NA     | turquoise   |
| ENSMUSG00000041187 | Prkd2         | 101540 | turquoise   |
| ENSMUSG00000062627 | Mysm1         | 320713 | green       |
| ENSMUSG00000002550 | Uck1          | 22245  | blue        |
| ENSMUSG00000030720 | Cln3          | 12752  | turquoise   |
| ENSMUSG00000020211 | Sf3a2         | 20222  | black       |
| ENSMUSG00000020212 | Mdm1          | 17245  | magenta     |
| ENSMUSG00000030725 | NA            | NA     | turquoise   |
| ENSMUSG00000030726 | Pold3         | 67967  | salmon      |
| ENSMUSG00000030727 | Rabep2        | 70314  | blue        |
| ENSMUSG00000106951 | 5930430L01Rik | 319982 | yellow      |
| ENSMUSG00000020219 | Timm13        | 30055  | turquoise   |
| ENSMUSG00000106956 | NA            | NA     | pink        |
| ENSMUSG00000048930 | Tada3         | 101206 | blue        |
| ENSMUSG00000087569 | NA            | NA     | tan         |
| ENSMUSG00000055660 | Mettl4        | 76781  | pink        |
| ENSMUSG00000027495 | Fam210b       | 67017  | turquoise   |
| ENSMUSG00000083831 | NA            | NA     | brown       |
| ENSMUSG00000027496 | Aurka         | 20878  | magenta     |
| ENSMUSG00000083832 | NA            | NA     | pink        |
| ENSMUSG00000083833 | NA            | NA     | black       |
| ENSMUSG00000038425 | Poli          | 26447  | pink        |
| ENSMUSG00000027498 | Cstf1         | 67337  | red         |
| ENSMUSG00000083834 | NA            | NA     | pink        |
| ENSMUSG00000048939 | Atp13a5       | 268878 | yellow      |
| ENSMUSG00000027499 | Pkia          | 18767  | green       |
| ENSMUSG00000083836 | NA            | NA     | brown       |
| ENSMUSG00000062397 | Zfp706        | 68036  | green       |
| ENSMUSG00000083838 | NA            | NA     | pink        |
| ENSMUSG00000038429 | Usp5          | 22225  | green       |
| ENSMUSG00000006522 | Itih3         | 16426  | greenyellow |
| ENSMUSG00000023764 | Sfi1          | 78887  | brown       |
| ENSMUSG00000030493 | Faap24        | 101831 | pink        |
| ENSMUSG00000041420 | Meis3         | 17537  | turquoise   |
| ENSMUSG00000051934 | Spats2        | 72572  | brown       |
| ENSMUSG00000080059 | Rps19-ps3     | 277692 | turquoise   |



|                    |          |        |              |
|--------------------|----------|--------|--------------|
| ENSMUSG00000006526 | Tmem110  | 69179  | turquoise    |
| ENSMUSG00000030495 | Slc7a10  | 53896  | red          |
| ENSMUSG00000006527 | Sfmbt1   | 54650  | cyan         |
| ENSMUSG00000030498 | Gas2     | 14453  | magenta      |
| ENSMUSG00000030499 | Kctd15   | 233107 | turquoise    |
| ENSMUSG00000041426 | Hibch    | 227095 | yellow       |
| ENSMUSG00000041429 | Nthl1    | 18207  | brown        |
| ENSMUSG00000107143 | NA       | NA     | yellow       |
| ENSMUSG00000107145 | NA       | NA     | yellow       |
| ENSMUSG00000094530 | NA       | NA     | greenyellow  |
| ENSMUSG00000066362 | NA       | NA     | tan          |
| ENSMUSG00000049124 | NA       | NA     | black        |
| ENSMUSG00000102995 | NA       | NA     | yellow       |
| ENSMUSG00000073096 | Lrrc61   | 243371 | brown        |
| ENSMUSG00000055900 | NA       | NA     | blue         |
| ENSMUSG00000017221 | Psmc3    | 22123  | yellow       |
| ENSMUSG00000034462 | Pkd2     | 18764  | blue         |
| ENSMUSG00000034463 | Scara3   | 219151 | black        |
| ENSMUSG00000027737 | Slc7a11  | 26570  | purple       |
| ENSMUSG00000027739 | Rab33b   | 19338  | turquoise    |
| ENSMUSG00000006299 | Aamp     | 227290 | midnightblue |
| ENSMUSG00000041199 | Rpusd1   | 106707 | turquoise    |
| ENSMUSG00000030733 | Sh2b1    | 20399  | green        |
| ENSMUSG00000020220 | Vps13d   | 230895 | yellow       |
| ENSMUSG00000030735 | NA       | NA     | blue         |
| ENSMUSG00000020224 | Llph     | 66225  | blue         |
| ENSMUSG00000020225 | Tmbim4   | 68212  | turquoise    |
| ENSMUSG00000030738 | Eif3c    | 56347  | green        |
| ENSMUSG00000020228 | Helb     | 117599 | turquoise    |
| ENSMUSG00000087574 | NA       | NA     | yellow       |
| ENSMUSG00000106965 | NA       | NA     | turquoise    |
| ENSMUSG00000098506 | NA       | NA     | lightcyan    |
| ENSMUSG00000055670 | Zzef1    | 195018 | turquoise    |
| ENSMUSG00000045160 | NA       | NA     | blue         |
| ENSMUSG00000055675 | Kbtbd11  | 74901  | turquoise    |
| ENSMUSG00000083844 | Ube2d-ps | 76508  | brown        |
| ENSMUSG00000055676 | NA       | NA     | yellow       |
| ENSMUSG00000048949 | NA       | NA     | yellow       |
| ENSMUSG00000038437 | Mllt6    | 246198 | turquoise    |
| ENSMUSG00000041431 | Ccnb1    | 268697 | magenta      |
| ENSMUSG00000034707 | Gns      | 75612  | yellow       |
| ENSMUSG00000034708 | Grn      | 14824  | purple       |
| ENSMUSG00000034709 | Ppp1r21  | 73825  | turquoise    |
| ENSMUSG00000041438 | Cirh1a   | 21771  | blue         |
| ENSMUSG00000002803 | Btbd6    | 399566 | turquoise    |
| ENSMUSG00000002804 | Nudt14   | 66174  | blue         |
| ENSMUSG00000098274 | Rpl24    | 68193  | black        |
| ENSMUSG00000002808 | Epdr1    | 105298 | purple       |
| ENSMUSG00000059647 | NA       | NA     | cyan         |
| ENSMUSG00000084033 | NA       | NA     | yellow       |
| ENSMUSG00000044982 | Sft2d3   | 67158  | turquoise    |
| ENSMUSG00000103423 | NA       | NA     | pink         |
| ENSMUSG00000027742 | Cog6     | 67542  | turquoise    |
| ENSMUSG00000034471 | Caskin2  | 140721 | yellow       |

|                    |               |        |             |
|--------------------|---------------|--------|-------------|
| ENSMUSG00000055912 | Tmem150a      | 232086 | yellow      |
| ENSMUSG00000034473 | Sec22a        | 317717 | turquoise   |
| ENSMUSG00000044986 | Tst           | 22117  | greenyellow |
| ENSMUSG00000084038 | NA            | NA     | pink        |
| ENSMUSG00000027746 | Ufm1          | 67890  | turquoise   |
| ENSMUSG00000055917 | Zfp277        | 246196 | blue        |
| ENSMUSG00000052133 | Sema5b        | 20357  | green       |
| ENSMUSG00000062646 | NA            | NA     | turquoise   |
| ENSMUSG00000062647 | Rpl7a         | 27176  | green       |
| ENSMUSG00000045409 | Trim39        | 79263  | turquoise   |
| ENSMUSG00000052137 | Rbm12b2       | 77604  | blue        |
| ENSMUSG00000030741 | Spns1         | 73658  | turquoise   |
| ENSMUSG00000052139 | Bre           | 107976 | red         |
| ENSMUSG00000020230 | Prmt2         | 15468  | turquoise   |
| ENSMUSG00000020231 | Dip2a         | 64451  | yellow      |
| ENSMUSG00000030744 | Rps3          | 27050  | black       |
| ENSMUSG00000020232 | Hmg20b        | 15353  | blue        |
| ENSMUSG00000002578 | Ikzf4         | 22781  | turquoise   |
| ENSMUSG00000020235 | NA            | NA     | green       |
| ENSMUSG00000020238 | Ncln          | 103425 | blue        |
| ENSMUSG00000055681 | NA            | NA     | turquoise   |
| ENSMUSG00000083852 | NA            | NA     | lightcyan   |
| ENSMUSG00000090582 | NA            | NA     | turquoise   |
| ENSMUSG00000083854 | NA            | NA     | turquoise   |
| ENSMUSG00000066613 | Zfp932        | 69504  | brown       |
| ENSMUSG00000038446 | Cdc40         | 71713  | blue        |
| ENSMUSG00000083856 | NA            | NA     | turquoise   |
| ENSMUSG00000045176 | Borcs6        | 71923  | turquoise   |
| ENSMUSG00000083859 | NA            | NA     | tan         |
| ENSMUSG00000051950 | B3glct        | 381694 | turquoise   |
| ENSMUSG00000024201 | Kdm4b         | 193796 | turquoise   |
| ENSMUSG00000034714 | Ttyh2         | 117160 | purple      |
| ENSMUSG00000013275 | Slc41a1       | 98396  | yellow      |
| ENSMUSG00000041444 | Arhgap32      | 330914 | turquoise   |
| ENSMUSG00000024205 | NA            | NA     | black       |
| ENSMUSG00000024208 | Uqcc2         | 67267  | blue        |
| ENSMUSG00000024209 | 1700061G19Rik | 78625  | grey60      |
| ENSMUSG00000098281 | NA            | NA     | red         |
| ENSMUSG00000002812 | Flii          | 14248  | turquoise   |
| ENSMUSG00000107160 | NA            | NA     | tan         |
| ENSMUSG00000094551 | NA            | NA     | turquoise   |
| ENSMUSG00000059658 | NA            | NA     | tan         |
| ENSMUSG00000059659 | Gm10069       | 791299 | turquoise   |
| ENSMUSG00000044991 | 1110034G24Rik | 73747  | turquoise   |
| ENSMUSG00000103433 | NA            | NA     | turquoise   |
| ENSMUSG00000027751 | Supt20        | 56790  | red         |
| ENSMUSG00000094557 | NA            | NA     | turquoise   |
| ENSMUSG00000027752 | Exosc8        | 69639  | magenta     |
| ENSMUSG00000034480 | Diaph2        | 54004  | brown       |
| ENSMUSG00000045410 | Akr1e1        | 56043  | turquoise   |
| ENSMUSG00000055923 | Aasdh         | 231326 | turquoise   |
| ENSMUSG00000034484 | Snx2          | 67804  | turquoise   |
| ENSMUSG00000045411 | 2410002F23Rik | 668661 | turquoise   |
| ENSMUSG00000034487 | Kdelc2        | 68304  | green       |

|                    |            |           |              |
|--------------------|------------|-----------|--------------|
| ENSMUSG00000052144 | Ppp4r2     | 232314    | turquoise    |
| ENSMUSG00000002580 | Mien1      | 103742    | midnightblue |
| ENSMUSG00000052146 | Rps10      | 67097     | black        |
| ENSMUSG00000030750 | Nsmce1     | 67711     | red          |
| ENSMUSG00000080316 | Spaca6     | 75202     | turquoise    |
| ENSMUSG00000030751 | Psma1      | 26440     | black        |
| ENSMUSG00000030752 | Kdm8       | 77035     | cyan         |
| ENSMUSG00000030753 | Prkrir     | 72981     | blue         |
| ENSMUSG00000030754 | Copb1      | 70349     | brown        |
| ENSMUSG00000087590 | Epb4114aos | 69749     | blue         |
| ENSMUSG00000020246 | Hcfc2      | 67933     | blue         |
| ENSMUSG00000030759 | Far1       | 67420     | turquoise    |
| ENSMUSG00000020248 | Nfyb       | 18045     | green        |
| ENSMUSG00000106981 | NA         | NA        | yellow       |
| ENSMUSG00000087598 | Zfp111     | 56707     | turquoise    |
| ENSMUSG00000048960 | Prex2      | 109294    | purple       |
| ENSMUSG00000106988 | NA         | NA        | green        |
| ENSMUSG00000038451 | Spsb2      | 14794     | turquoise    |
| ENSMUSG00000066620 | NA         | NA        | pink         |
| ENSMUSG00000045180 | Shroom2    | 110380    | blue         |
| ENSMUSG00000066621 | Tecpr1     | 70381     | turquoise    |
| ENSMUSG00000083863 | NA         | NA        | yellow       |
| ENSMUSG00000090592 | NA         | NA        | yellow       |
| ENSMUSG00000083864 | NA         | NA        | turquoise    |
| ENSMUSG00000038456 | Dennd2a    | 209773    | turquoise    |
| ENSMUSG00000038459 | Abhd17c    | 70178     | blue         |
| ENSMUSG00000023791 | Pigx       | 72084     | brown        |
| ENSMUSG00000066629 | NA         | NA        | blue         |
| ENSMUSG00000023795 | NA         | NA        | yellow       |
| ENSMUSG00000034723 | Tmx4       | 52837     | blue         |
| ENSMUSG00000034724 | Cnot6l     | 231464    | turquoise    |
| ENSMUSG00000024212 | Mlt1       | 64144     | green        |
| ENSMUSG00000041453 | Rpl21      | 19933     | black        |
| ENSMUSG00000024213 | Nudt3      | 56409     | turquoise    |
| ENSMUSG00000034729 | Mrps10     | 64657     | turquoise    |
| ENSMUSG00000024217 | Snrpc      | 20630     | black        |
| ENSMUSG00000002820 | Atg4d      | 235040    | turquoise    |
| ENSMUSG00000024218 | Taf11      | 68776     | red          |
| ENSMUSG00000041459 | Tardbp     | 230908    | blue         |
| ENSMUSG00000024219 | Anks1      | 224650    | blue         |
| ENSMUSG00000002825 | Qtrt1      | 60507     | turquoise    |
| ENSMUSG00000107176 | Gm9794     | 100042008 | black        |
| ENSMUSG00000066392 | Nrxn3      | 18191     | greenyellow  |
| ENSMUSG00000084050 | NA         | NA        | blue         |
| ENSMUSG00000059669 | Taf1b      | 21340     | red          |
| ENSMUSG00000084055 | NA         | NA        | turquoise    |
| ENSMUSG00000027763 | Mbnl1      | 56758     | brown        |
| ENSMUSG00000055932 | Fto        | 26383     | turquoise    |
| ENSMUSG00000062661 | Ncs1       | 14299     | turquoise    |
| ENSMUSG00000045427 | Hnrnp2     | 56258     | blue         |
| ENSMUSG00000052155 | Acvr2a     | 11480     | blue         |
| ENSMUSG00000030760 | Acer3      | 66190     | turquoise    |
| ENSMUSG00000030761 | Myo7a      | 17921     | yellow       |
| ENSMUSG00000020250 | Txnrd1     | 50493     | blue         |

|                    |            |        |           |
|--------------------|------------|--------|-----------|
| ENSMUSG00000030763 | Lcmt1      | 30949  | green     |
| ENSMUSG00000020253 | NA         | NA     | turquoise |
| ENSMUSG00000030766 | Arhgap17   | 70497  | brown     |
| ENSMUSG00000020255 | D10Wsu102e | 28109  | green     |
| ENSMUSG00000030768 | Disp1      | 68897  | turquoise |
| ENSMUSG00000020256 | Aldh1l2    | 216188 | blue      |
| ENSMUSG00000020257 | Wdr82      | 77305  | black     |
| ENSMUSG00000020258 | Glyctk     | 235582 | grey60    |
| ENSMUSG00000048970 | C1galt1c1  | 59048  | blue      |
| ENSMUSG00000038462 | Uqcrfs1    | 66694  | yellow    |
| ENSMUSG00000038463 | Olfml2b    | 320078 | turquoise |
| ENSMUSG00000066632 | NA         | NA     | pink      |
| ENSMUSG00000048978 | Nrsn1      | 22360  | brown     |
| ENSMUSG00000045193 | Cirbp      | 12696  | blue      |
| ENSMUSG00000056121 | Fez2       | 225020 | turquoise |
| ENSMUSG00000083875 | NA         | NA     | tan       |
| ENSMUSG00000038467 | Chmp4b     | 75608  | turquoise |
| ENSMUSG00000056124 | B4galt6    | 56386  | grey60    |
| ENSMUSG00000066637 | Ttc32      | 75516  | green     |
| ENSMUSG00000083878 | NA         | NA     | tan       |
| ENSMUSG00000091020 | NA         | NA     | green     |
| ENSMUSG00000083879 | NA         | NA     | turquoise |
| ENSMUSG00000034730 | Adgrb1     | 107831 | blue      |
| ENSMUSG00000024220 | Zfp523     | 224656 | cyan      |
| ENSMUSG00000062901 | Klhl24     | 75785  | blue      |
| ENSMUSG00000024222 | Fkbp5      | 14229  | magenta   |
| ENSMUSG00000062906 | Hdac10     | 170787 | red       |
| ENSMUSG00000024227 | Pdzph1     | 69239  | blue      |
| ENSMUSG00000062908 | Acadm      | 11364  | turquoise |
| ENSMUSG0000002833  | Hdgfrp2    | 15193  | green     |
| ENSMUSG00000107182 | NA         | NA     | yellow    |
| ENSMUSG00000049164 | Zfp518a    | 72672  | turquoise |
| ENSMUSG00000084060 | NA         | NA     | yellow    |
| ENSMUSG00000027770 | Dhx36      | 72162  | brown     |
| ENSMUSG00000027774 | NA         | NA     | turquoise |
| ENSMUSG00000084067 | NA         | NA     | red       |
| ENSMUSG00000027775 | Mfsd1      | 66868  | blue      |
| ENSMUSG00000038702 | Dsel       | 319901 | turquoise |
| ENSMUSG00000055943 | NA         | NA     | yellow    |
| ENSMUSG00000073600 | Prob1      | 381148 | turquoise |
| ENSMUSG00000090841 | Myl6       | 17904  | green     |
| ENSMUSG00000017264 | Exosc10    | 50912  | green     |
| ENSMUSG00000027777 | Schip1     | 30953  | turquoise |
| ENSMUSG00000038704 | Aspdh      | 68352  | turquoise |
| ENSMUSG00000027778 | Ift80      | 68259  | blue      |
| ENSMUSG00000038705 | Gmeb2      | 229004 | turquoise |
| ENSMUSG00000045435 | NA         | NA     | turquoise |
| ENSMUSG00000038708 | Golga4     | 54214  | blue      |
| ENSMUSG00000045438 | NA         | NA     | blue      |
| ENSMUSG00000073607 | Gm10548    | 633395 | yellow    |
| ENSMUSG00000030770 | Parva      | 57342  | green     |
| ENSMUSG00000030772 | Dkk3       | 50781  | red       |
| ENSMUSG00000073609 | D2hgdh     | 98314  | turquoise |
| ENSMUSG00000020260 | Pofut2     | 80294  | yellow    |

|                    |          |        |              |
|--------------------|----------|--------|--------------|
| ENSMUSG00000020261 | Slc36a1  | 215335 | brown        |
| ENSMUSG00000030774 | Pak1     | 18479  | turquoise    |
| ENSMUSG00000041702 | Btbd7    | 238386 | blue         |
| ENSMUSG00000041703 | NA       | NA     | yellow       |
| ENSMUSG00000020263 | Appl2    | 216190 | purple       |
| ENSMUSG00000020265 | Sumo3    | 20610  | black        |
| ENSMUSG00000030779 | Rbbp6    | 19647  | turquoise    |
| ENSMUSG00000013539 | Tango2   | 27883  | turquoise    |
| ENSMUSG00000020267 | Hint1    | 15254  | midnightblue |
| ENSMUSG00000020268 | Lym7     | 75530  | turquoise    |
| ENSMUSG00000059912 | NA       | NA     | blue         |
| ENSMUSG00000066640 | Fbxl18   | 231863 | greenyellow  |
| ENSMUSG00000038473 | Nos1ap   | 70729  | brown        |
| ENSMUSG00000049401 | Ogfr     | 72075  | blue         |
| ENSMUSG00000066643 | Wdr35    | 74682  | turquoise    |
| ENSMUSG00000056131 | NA       | NA     | turquoise    |
| ENSMUSG00000083887 | NA       | NA     | yellow       |
| ENSMUSG00000094815 | NA       | NA     | brown        |
| ENSMUSG00000066647 | Gm5113   | 330503 | turquoise    |
| ENSMUSG00000084303 | NA       | NA     | turquoise    |
| ENSMUSG00000084304 | NA       | NA     | brown        |
| ENSMUSG00000006575 | Rundc3a  | 51799  | turquoise    |
| ENSMUSG00000041471 | Fam35a   | 75698  | turquoise    |
| ENSMUSG00000024231 | Cul2     | 71745  | turquoise    |
| ENSMUSG00000006576 | NA       | NA     | turquoise    |
| ENSMUSG00000034744 | Nagk     | 56174  | brown        |
| ENSMUSG00000024234 | Mtpap    | 67440  | brown        |
| ENSMUSG00000051989 | Smim11   | 68936  | blue         |
| ENSMUSG00000034748 | Sirt6    | 50721  | blue         |
| ENSMUSG00000024236 | Svil     | 225115 | turquoise    |
| ENSMUSG00000041477 | Dcp1b    | 319618 | turquoise    |
| ENSMUSG00000024238 | Zeb1     | 21417  | blue         |
| ENSMUSG00000052406 | Rexo4    | 227656 | turquoise    |
| ENSMUSG00000052407 | Ccdc171  | 320226 | greenyellow  |
| ENSMUSG00000002844 | Adprh    | 11544  | turquoise    |
| ENSMUSG00000002845 | Tmem39a  | 67846  | blue         |
| ENSMUSG00000002846 | NA       | NA     | green        |
| ENSMUSG00000084072 | NA       | NA     | blue         |
| ENSMUSG00000059689 | Zfp637   | 232337 | turquoise    |
| ENSMUSG00000027782 | Kpna4    | 16649  | magenta      |
| ENSMUSG00000027784 | NA       | NA     | turquoise    |
| ENSMUSG00000038712 | Fam63a   | 75007  | red          |
| ENSMUSG00000062683 | Atp5g2   | 67942  | black        |
| ENSMUSG00000027787 | NA       | NA     | blue         |
| ENSMUSG00000038717 | Atp5l    | 27425  | brown        |
| ENSMUSG00000038718 | Pbx3     | 18516  | yellow       |
| ENSMUSG00000073616 | Myeov2   | 66915  | midnightblue |
| ENSMUSG00000028207 | Asph     | 65973  | brown        |
| ENSMUSG00000030780 | BC017158 | 233913 | turquoise    |
| ENSMUSG00000020271 | Fbxw11   | 103583 | midnightblue |
| ENSMUSG00000063108 | NA       | NA     | blue         |
| ENSMUSG00000041712 | Ubr7     | 66622  | blue         |
| ENSMUSG00000003031 | Cdkn1b   | 12576  | brown        |
| ENSMUSG00000020273 | Papolg   | 216578 | red          |

|                    |               |        |              |
|--------------------|---------------|--------|--------------|
| ENSMUSG00000031200 | Mtcp1         | 17763  | turquoise    |
| ENSMUSG00000006818 | Sod2          | 20656  | green        |
| ENSMUSG00000003033 | Ap1m1         | 11767  | green        |
| ENSMUSG00000031201 | Brcc3         | 210766 | blue         |
| ENSMUSG00000030788 | Rnf141        | 67150  | blue         |
| ENSMUSG00000041716 | NA            | NA     | blue         |
| ENSMUSG00000020277 | Pfkl          | 18641  | yellow       |
| ENSMUSG00000003037 | NA            | NA     | green        |
| ENSMUSG00000041718 | Alg13         | 67574  | green        |
| ENSMUSG00000003038 | Hmgn2         | 15331  | red          |
| ENSMUSG00000003039 | Fam32a        | 67922  | green        |
| ENSMUSG00000031207 | Msn           | 17698  | green        |
| ENSMUSG00000059920 | 4930453N24Rik | 67609  | turquoise    |
| ENSMUSG00000083890 | NA            | NA     | brown        |
| ENSMUSG00000038481 | Cdk19         | 78334  | turquoise    |
| ENSMUSG00000059921 | Unc5c         | 22253  | blue         |
| ENSMUSG00000098559 | NA            | NA     | tan          |
| ENSMUSG00000038482 | NA            | NA     | black        |
| ENSMUSG00000059923 | Grb2          | 14784  | turquoise    |
| ENSMUSG00000083892 | NA            | NA     | brown        |
| ENSMUSG00000049411 | Tmem241       | 338363 | turquoise    |
| ENSMUSG00000048997 | Atxn7l2       | 72522  | turquoise    |
| ENSMUSG00000038485 | Socs7         | 192157 | turquoise    |
| ENSMUSG00000038486 | Sv2a          | 64051  | turquoise    |
| ENSMUSG00000084310 | NA            | NA     | turquoise    |
| ENSMUSG00000091040 | NA            | NA     | turquoise    |
| ENSMUSG00000038489 | Polr2l        | 66491  | turquoise    |
| ENSMUSG00000083899 | NA            | NA     | black        |
| ENSMUSG00000084314 | NA            | NA     | tan          |
| ENSMUSG00000034751 | Mast4         | 328329 | turquoise    |
| ENSMUSG00000024240 | Epc1          | 13831  | brown        |
| ENSMUSG00000006585 | Cdt1          | 67177  | salmon       |
| ENSMUSG00000024241 | Sos1          | 20662  | brown        |
| ENSMUSG00000084319 | NA            | NA     | black        |
| ENSMUSG00000024242 | Map4k3        | 225028 | yellow       |
| ENSMUSG00000034755 | Pcdh11x       | 245578 | turquoise    |
| ENSMUSG00000041483 | Zfp281        | 226442 | brown        |
| ENSMUSG00000034757 | Tmub2         | 72053  | turquoise    |
| ENSMUSG00000006589 | Aprt          | 11821  | midnightblue |
| ENSMUSG00000024245 | Tmem178       | 68027  | pink         |
| ENSMUSG00000024246 | Thumpd2       | 72167  | turquoise    |
| ENSMUSG00000024248 | Cox7a2l       | 20463  | turquoise    |
| ENSMUSG00000062929 | Cfl2          | 12632  | red          |
| ENSMUSG00000052419 | NA            | NA     | green        |
| ENSMUSG00000020513 | Tubd1         | 56427  | turquoise    |
| ENSMUSG00000020514 | Mrpl22        | 216767 | blue         |
| ENSMUSG00000020515 | Cnot8         | 69125  | brown        |
| ENSMUSG00000020516 | Rps6kb1       | 72508  | brown        |
| ENSMUSG00000020519 | NA            | NA     | turquoise    |
| ENSMUSG00000084081 | NA            | NA     | turquoise    |
| ENSMUSG00000103472 | Pcdhga7       | 93715  | pink         |
| ENSMUSG00000094597 | NA            | NA     | yellow       |
| ENSMUSG00000084086 | NA            | NA     | lightcyan    |
| ENSMUSG00000062691 | NA            | NA     | turquoise    |

|                    |               |        |           |
|--------------------|---------------|--------|-----------|
| ENSMUSG00000038722 | Bud31         | 231889 | blue      |
| ENSMUSG00000055963 | NA            | NA     | turquoise |
| ENSMUSG00000027797 | Dclk1         | 13175  | yellow    |
| ENSMUSG00000028211 | Trp53inp1     | 60599  | turquoise |
| ENSMUSG00000090862 | Rps13         | 68052  | black     |
| ENSMUSG00000028212 | Ccne2         | 12448  | salmon    |
| ENSMUSG00000017286 | Glod4         | 67201  | green     |
| ENSMUSG00000027799 | Nbea          | 26422  | turquoise |
| ENSMUSG00000045455 | NA            | NA     | blue      |
| ENSMUSG00000017288 | Vps53         | 68299  | blue      |
| ENSMUSG00000073627 | C130036L24Rik | 319336 | turquoise |
| ENSMUSG00000028218 | Fam92a        | 68099  | black     |
| ENSMUSG00000052188 | NA            | NA     | blue      |
| ENSMUSG00000041720 | Pi4ka         | 224020 | turquoise |
| ENSMUSG00000020280 | Pus10         | 74467  | turquoise |
| ENSMUSG00000020282 | Rhbdf1        | 13650  | turquoise |
| ENSMUSG00000030795 | Fus           | 233908 | blue      |
| ENSMUSG00000020283 | Pex13         | 72129  | turquoise |
| ENSMUSG00000030796 | Tead2         | 21677  | salmon    |
| ENSMUSG00000020284 | 1810043G02Rik | 67884  | turquoise |
| ENSMUSG00000020287 | Mpg           | 268395 | pink      |
| ENSMUSG00000031214 | NA            | NA     | turquoise |
| ENSMUSG00000020288 | Ahsa2         | 268390 | brown     |
| ENSMUSG00000020289 | Nprl3         | 17168  | turquoise |
| ENSMUSG00000041729 | Coro2b        | 235431 | yellow    |
| ENSMUSG00000031217 | Efnb1         | 13641  | turquoise |
| ENSMUSG00000049421 | Zfp260        | 26466  | blue      |
| ENSMUSG00000049422 | Chchd10       | 103172 | black     |
| ENSMUSG00000038495 | Otud7b        | 229603 | brown     |
| ENSMUSG00000038497 | Tmco3         | 234076 | turquoise |
| ENSMUSG00000056153 | Socs6         | 54607  | red       |
| ENSMUSG00000059939 | 9430015G10Rik | 230996 | blue      |
| ENSMUSG00000103713 | NA            | NA     | pink      |
| ENSMUSG00000034761 | Map4k5        | 399510 | brown     |
| ENSMUSG00000041491 | Cep78         | 208518 | green     |
| ENSMUSG00000062931 | Zfp938        | 237411 | yellow    |
| ENSMUSG00000084328 | NA            | NA     | turquoise |
| ENSMUSG00000024251 | Thada         | 240174 | blue      |
| ENSMUSG00000084329 | NA            | NA     | turquoise |
| ENSMUSG00000062933 | NA            | NA     | black     |
| ENSMUSG00000024253 | Dync2li1      | 213575 | grey60    |
| ENSMUSG00000006599 | Gtf2h1        | 14884  | blue      |
| ENSMUSG00000052423 | B4galt3       | 57370  | blue      |
| ENSMUSG00000062937 | Mtap          | 66902  | blue      |
| ENSMUSG00000041498 | Kif14         | 381293 | magenta   |
| ENSMUSG00000024258 | Polr2d        | 69241  | blue      |
| ENSMUSG00000024259 | Slc25a46      | 67453  | pink      |
| ENSMUSG00000052428 | Tmco1         | 68944  | yellow    |
| ENSMUSG00000020521 | Rnft1         | 76892  | turquoise |
| ENSMUSG00000020522 | Mfap3         | 216760 | green     |
| ENSMUSG00000020523 | Fam114a2      | 67726  | blue      |
| ENSMUSG00000020525 | Ppm1d         | 53892  | blue      |
| ENSMUSG00000020526 | Znhit3        | 448850 | brown     |
| ENSMUSG00000020527 | Myo19         | 66196  | grey60    |

|                    |               |           |             |
|--------------------|---------------|-----------|-------------|
| ENSMUSG00000020528 | Prpsap2       | 212627    | brown       |
| ENSMUSG00000084093 | NA            | NA        | brown       |
| ENSMUSG00000084094 | NA            | NA        | greenyellow |
| ENSMUSG00000017291 | Taok1         | 216965    | blue        |
| ENSMUSG00000066900 | Suds3         | 71954     | turquoise   |
| ENSMUSG00000084098 | NA            | NA        | brown       |
| ENSMUSG00000084099 | NA            | NA        | turquoise   |
| ENSMUSG00000038733 | Wdr26         | 226757    | greenyellow |
| ENSMUSG00000028221 | Tmem55a       | 72519     | brown       |
| ENSMUSG00000052192 | NA            | NA        | tan         |
| ENSMUSG00000038736 | Nudcd1        | 67429     | red         |
| ENSMUSG00000028223 | Decr1         | 67460     | yellow      |
| ENSMUSG00000045464 | NA            | NA        | turquoise   |
| ENSMUSG00000073633 | Fbxo36        | 66153     | turquoise   |
| ENSMUSG00000028224 | Nbn           | 27354     | blue        |
| ENSMUSG00000038738 | Shank1        | 243961    | brown       |
| ENSMUSG00000045466 | Zfp956        | 101197    | turquoise   |
| ENSMUSG00000017299 | Dnttip1       | 76233     | yellow      |
| ENSMUSG00000028228 | Cpne3         | 70568     | pink        |
| ENSMUSG00000028229 | Rmdn1         | 66302     | yellow      |
| ENSMUSG00000073639 | NA            | NA        | blue        |
| ENSMUSG00000020290 | Xpo1          | 103573    | green       |
| ENSMUSG00000063129 | Aldoart2      | 79459     | greenyellow |
| ENSMUSG00000041733 | Coq5          | 52064     | turquoise   |
| ENSMUSG00000031221 | Igbp1         | 18518     | red         |
| ENSMUSG00000041736 | Tspo          | 12257     | brown       |
| ENSMUSG00000020297 | Nsg2          | 18197     | red         |
| ENSMUSG00000031226 | Pbdc1         | 67683     | red         |
| ENSMUSG00000031227 | Magee1        | 107528    | turquoise   |
| ENSMUSG00000031229 | Atrx          | 22589     | blue        |
| ENSMUSG00000094843 | NA            | NA        | turquoise   |
| ENSMUSG00000084331 | NA            | NA        | pink        |
| ENSMUSG00000103722 | NA            | NA        | greenyellow |
| ENSMUSG00000056167 | Cnot10        | 78893     | blue        |
| ENSMUSG00000049439 | NA            | NA        | turquoise   |
| ENSMUSG00000034771 | Tle2          | 21886     | turquoise   |
| ENSMUSG00000024260 | Sap130        | 269003    | turquoise   |
| ENSMUSG00000024261 | Syt4          | 20983     | magenta     |
| ENSMUSG00000052430 | Bmpr1b        | 12167     | blue        |
| ENSMUSG00000062944 | 9130023H24Rik | 100043133 | turquoise   |
| ENSMUSG00000002870 | Mcm2          | 17216     | salmon      |
| ENSMUSG00000062949 | Atp11c        | 320940    | salmon      |
| ENSMUSG00000002871 | Tpra1         | 24100     | greenyellow |
| ENSMUSG00000024269 | Tpgs2         | 66648     | turquoise   |
| ENSMUSG00000007029 | Vars          | 22321     | black       |
| ENSMUSG00000020530 | Ggnbp2        | 217039    | green       |
| ENSMUSG00000020532 | Acaca         | 107476    | brown       |
| ENSMUSG00000010021 | Kif19a        | 286942    | turquoise   |
| ENSMUSG00000020534 | NA            | NA        | salmon      |
| ENSMUSG00000020536 | Llgl1         | 16897     | green       |
| ENSMUSG00000020537 | Drg2          | 13495     | green       |
| ENSMUSG00000010025 | Aldh3a2       | 11671     | turquoise   |
| ENSMUSG00000020538 | Srebfl        | 20787     | yellow      |
| ENSMUSG00000055980 | Irs1          | 16367     | brown       |



|                    |               |    |        |              |
|--------------------|---------------|----|--------|--------------|
| ENSMUSG00000038740 | Mvb12b        |    | 72543  | turquoise    |
| ENSMUSG00000038742 | Angptl6       |    | 70726  | black        |
| ENSMUSG00000073640 | NA            | NA |        | red          |
| ENSMUSG00000028232 | Tmem68        |    | 72098  | turquoise    |
| ENSMUSG00000028233 | Tgs1          |    | 116940 | blue         |
| ENSMUSG00000073643 | Wdfy1         |    | 69368  | turquoise    |
| ENSMUSG00000028234 | NA            | NA |        | black        |
| ENSMUSG00000073647 | NA            | NA |        | turquoise    |
| ENSMUSG00000041740 | Rnf10         |    | 50849  | green        |
| ENSMUSG00000091305 | NA            | NA |        | turquoise    |
| ENSMUSG00000024500 | Ppp2r2b       |    | 72930  | blue         |
| ENSMUSG00000024501 | Dpysl3        |    | 22240  | red          |
| ENSMUSG00000024502 | Jakmip2       |    | 76217  | blue         |
| ENSMUSG00000003062 | Stard3nl      |    | 76205  | turquoise    |
| ENSMUSG00000031231 | Cox7b         |    | 66142  | turquoise    |
| ENSMUSG00000031232 | Magt1         |    | 67075  | brown        |
| ENSMUSG00000041747 | Utp15         |    | 105372 | pink         |
| ENSMUSG00000024507 | Hsd17b4       |    | 15488  | turquoise    |
| ENSMUSG00000003068 | Stk11         |    | 20869  | brown        |
| ENSMUSG00000107462 | NA            | NA |        | tan          |
| ENSMUSG00000084342 | NA            | NA |        | brown        |
| ENSMUSG00000103733 | NA            | NA |        | pink         |
| ENSMUSG00000034780 | B3galt1       |    | 26877  | turquoise    |
| ENSMUSG00000034781 | Gna11         |    | 14672  | turquoise    |
| ENSMUSG00000084347 | NA            | NA |        | brown        |
| ENSMUSG00000067106 | NA            | NA |        | pink         |
| ENSMUSG00000024270 | Slc39a6       |    | 106957 | blue         |
| ENSMUSG00000084348 | NA            | NA |        | turquoise    |
| ENSMUSG00000024271 | Elp2          |    | 58523  | green        |
| ENSMUSG00000084349 | NA            | NA |        | black        |
| ENSMUSG00000024273 | 2700062C07Rik |    | 68046  | blue         |
| ENSMUSG00000007033 | Hspa1l        |    | 15482  | lightcyan    |
| ENSMUSG00000035202 | Lars2         |    | 102436 | turquoise    |
| ENSMUSG00000024276 | Zfp397        |    | 69256  | blue         |
| ENSMUSG00000034789 | Rab24         |    | 19336  | turquoise    |
| ENSMUSG00000017548 | Suz12         |    | 52615  | blue         |
| ENSMUSG00000035203 | Epn1          |    | 13854  | turquoise    |
| ENSMUSG00000024277 | Mapre2        |    | 212307 | turquoise    |
| ENSMUSG00000007036 | Abhd16a       |    | 193742 | yellow       |
| ENSMUSG00000052446 | Zfp961        |    | 234413 | brown        |
| ENSMUSG00000002881 | Nab1          |    | 17936  | turquoise    |
| ENSMUSG00000007038 | NA            | NA |        | yellow       |
| ENSMUSG00000035206 | Sppi2b        |    | 73218  | turquoise    |
| ENSMUSG00000007039 | Ddah2         |    | 51793  | green        |
| ENSMUSG00000020541 | Tom1l1        |    | 71943  | turquoise    |
| ENSMUSG00000020544 | NA            | NA |        | yellow       |
| ENSMUSG00000020546 | Stxbp4        |    | 20913  | turquoise    |
| ENSMUSG00000020547 | Bzw2          |    | 66912  | red          |
| ENSMUSG00000020549 | Elac2         |    | 68626  | green        |
| ENSMUSG00000003308 | Keap1         |    | 50868  | midnightblue |
| ENSMUSG00000095042 | NA            | NA |        | turquoise    |
| ENSMUSG00000055991 | Zkscan5       |    | 22757  | yellow       |
| ENSMUSG00000107707 | NA            | NA |        | greenyellow  |
| ENSMUSG00000045482 | Trrap         |    | 100683 | turquoise    |

|                    |              |        |              |
|--------------------|--------------|--------|--------------|
| ENSMUSG00000028243 | NA           | NA     | brown        |
| ENSMUSG00000056412 | NA           | NA     | turquoise    |
| ENSMUSG00000028245 | Nsmaf        | 18201  | turquoise    |
| ENSMUSG00000028246 | NA           | NA     | cyan         |
| ENSMUSG00000006850 | Tmco6        | 71983  | turquoise    |
| ENSMUSG00000073656 | NA           | NA     | greenyellow  |
| ENSMUSG00000028247 | Coq3         | 230027 | turquoise    |
| ENSMUSG00000028248 | Pnlsr        | 66625  | green        |
| ENSMUSG00000063145 | Bbs5         | 72569  | turquoise    |
| ENSMUSG00000028249 | Sdcbp        | 53378  | blue         |
| ENSMUSG00000063146 | Clip2        | 269713 | turquoise    |
| ENSMUSG00000003070 | Efna2        | 13637  | yellow       |
| ENSMUSG00000003072 | Atp5d        | 66043  | turquoise    |
| ENSMUSG00000024513 | Mbd2         | 17191  | turquoise    |
| ENSMUSG00000031242 | 2610002M06Ri | 67028  | blue         |
| ENSMUSG00000024515 | Smad4        | 17128  | pink         |
| ENSMUSG00000024516 | Sec11c       | 66286  | yellow       |
| ENSMUSG00000031245 | Hmgn5        | 50887  | red          |
| ENSMUSG00000031246 | Sh3bgrl      | 56726  | red          |
| ENSMUSG00000107470 | NA           | NA     | midnightblue |
| ENSMUSG00000107476 | Zfp862-ps    | 58894  | yellow       |
| ENSMUSG00000066693 | NA           | NA     | lightcyan    |
| ENSMUSG00000099019 | NA           | NA     | red          |
| ENSMUSG00000056185 | Snx32        | 225861 | purple       |
| ENSMUSG00000091083 | NA           | NA     | turquoise    |
| ENSMUSG00000017550 | Atad5        | 237877 | salmon       |
| ENSMUSG00000034793 | G6pc3        | 68401  | turquoise    |
| ENSMUSG00000091086 | NA           | NA     | black        |
| ENSMUSG00000007041 | NA           | NA     | green        |
| ENSMUSG00000062963 | Ufc1         | 66155  | black        |
| ENSMUSG00000024283 | Wac          | 225131 | brown        |
| ENSMUSG00000035211 | Xrra1        | 446101 | yellow       |
| ENSMUSG00000035212 | Leprot       | 230514 | turquoise    |
| ENSMUSG00000034799 | NA           | NA     | blue         |
| ENSMUSG00000024287 | Thoc1        | 225160 | turquoise    |
| ENSMUSG00000052456 | Asna1        | 56495  | brown        |
| ENSMUSG00000035215 | Lsm7         | 66094  | red          |
| ENSMUSG00000052459 | Atp6v1a      | 11964  | brown        |
| ENSMUSG00000013822 | Elof1        | 66126  | green        |
| ENSMUSG00000002897 | NA           | NA     | yellow       |
| ENSMUSG00000003316 | Glg1         | 20340  | green        |
| ENSMUSG00000010045 | Tmem115      | 56395  | turquoise    |
| ENSMUSG00000010047 | Hyal2        | 15587  | brown        |
| ENSMUSG00000010048 | Ifrd2        | 15983  | blue         |
| ENSMUSG00000038762 | Abcf1        | 224742 | red          |
| ENSMUSG00000028251 | Tstd3        | 77032  | brown        |
| ENSMUSG00000028252 | Ccnc         | 51813  | blue         |
| ENSMUSG00000038766 | Gabpb2       | 213054 | blue         |
| ENSMUSG00000073664 | NA           | NA     | turquoise    |
| ENSMUSG00000028256 | Odf2l        | 52184  | brown        |
| ENSMUSG00000056429 | Tgoln1       | 22134  | turquoise    |
| ENSMUSG00000013593 | Ndufs2       | 226646 | blue         |
| ENSMUSG00000041762 | Gpr155       | 68526  | yellow       |
| ENSMUSG00000041763 | Tpp2         | 22019  | yellow       |

|                    |          |    |        |             |
|--------------------|----------|----|--------|-------------|
| ENSMUSG00000024524 | Gnal     |    | 14680  | turquoise   |
| ENSMUSG00000041765 | Ubac2    |    | 68889  | turquoise   |
| ENSMUSG00000024525 | Impa2    |    | 114663 | turquoise   |
| ENSMUSG00000024527 | Afg3l2   |    | 69597  | turquoise   |
| ENSMUSG00000024528 | Srfbp1   |    | 67222  | brown       |
| ENSMUSG00000041769 | Ppp2r2d  |    | 52432  | green       |
| ENSMUSG00000031256 | Cstf2    |    | 108062 | green       |
| ENSMUSG00000099021 | Rn7s1    |    | 103948 | turquoise   |
| ENSMUSG00000059970 | Hspa2    |    | 15512  | greenyellow |
| ENSMUSG00000094870 | Zfp131   |    | 72465  | blue        |
| ENSMUSG00000059974 | Ntm      |    | 235106 | greenyellow |
| ENSMUSG00000059975 | Zfp74    |    | 72723  | blue        |
| ENSMUSG00000084361 | NA       | NA |        | blue        |
| ENSMUSG00000067121 | NA       | NA |        | black       |
| ENSMUSG00000017561 | Crlf3    |    | 54394  | turquoise   |
| ENSMUSG00000091095 | NA       | NA |        | turquoise   |
| ENSMUSG00000024290 | Rock1    |    | 19877  | blue        |
| ENSMUSG00000084368 | NA       | NA |        | pink        |
| ENSMUSG00000007050 | Lsm2     |    | 27756  | salmon      |
| ENSMUSG00000024292 | Cyp4f14  |    | 64385  | yellow      |
| ENSMUSG00000024293 | Esco1    |    | 77805  | yellow      |
| ENSMUSG00000024294 | Mib1     |    | 225164 | yellow      |
| ENSMUSG00000024298 | NA       | NA |        | turquoise   |
| ENSMUSG00000024299 | Adamts10 |    | 224697 | turquoise   |
| ENSMUSG00000035227 | Spcs2    |    | 66624  | turquoise   |
| ENSMUSG00000020561 | Twistnb  |    | 28071  | blue        |
| ENSMUSG00000013833 | Med16    |    | 216154 | brown       |
| ENSMUSG00000020564 | Atxn7l1  |    | 380753 | turquoise   |
| ENSMUSG00000010051 | NA       | NA |        | turquoise   |
| ENSMUSG00000010054 | Tusc2    |    | 80385  | blue        |
| ENSMUSG00000010057 | Nprl2    |    | 56032  | turquoise   |
| ENSMUSG00000038773 | Kdm3b    |    | 277250 | brown       |
| ENSMUSG00000038774 | Ascc3    |    | 77987  | red         |
| ENSMUSG00000028261 | Ndufaf4  |    | 68493  | brown       |
| ENSMUSG00000063160 | Numb1    |    | 18223  | brown       |
| ENSMUSG00000028266 | Lmo4     |    | 16911  | brown       |
| ENSMUSG00000073676 | Hspe1    |    | 15528  | black       |
| ENSMUSG00000073678 | Pgap1    |    | 241062 | turquoise   |
| ENSMUSG00000017801 | Mlx      |    | 21428  | turquoise   |
| ENSMUSG00000024530 | Slmo1    |    | 225655 | blue        |
| ENSMUSG00000091337 | NA       | NA |        | blue        |
| ENSMUSG00000024533 | Spire1   |    | 68166  | turquoise   |
| ENSMUSG00000100215 | NA       | NA |        | black       |
| ENSMUSG00000024534 | Sncap    |    | 67847  | purple      |
| ENSMUSG00000041775 | Mapk1ip1 |    | 69546  | yellow      |
| ENSMUSG00000031262 | Cenpi    |    | 102920 | magenta     |
| ENSMUSG00000024535 | Snx24    |    | 69226  | yellow      |
| ENSMUSG00000041777 | NA       | NA |        | turquoise   |
| ENSMUSG00000024537 | Psmg2    |    | 107047 | green       |
| ENSMUSG00000024538 | Ppic     |    | 19038  | green       |
| ENSMUSG00000031266 | Gla      |    | 11605  | brown       |
| ENSMUSG00000041779 | NA       | NA |        | turquoise   |
| ENSMUSG00000024539 | Ptpn2    |    | 19255  | blue        |
| ENSMUSG00000052707 | Tnrc6a   |    | 233833 | brown       |

|                    |               |        |              |
|--------------------|---------------|--------|--------------|
| ENSMUSG0000003099  | Ppp5c         | 19060  | brown        |
| ENSMUSG00000020801 | Med31         | 67279  | yellow       |
| ENSMUSG00000020802 | Ube2o         | 217342 | turquoise    |
| ENSMUSG00000020803 | NA            | NA     | purple       |
| ENSMUSG00000020805 | Slc13a5       | 237831 | purple       |
| ENSMUSG00000059981 | Taok2         | 381921 | turquoise    |
| ENSMUSG00000099034 | NA            | NA     | turquoise    |
| ENSMUSG00000020807 | 4933427D14Rik | 74477  | turquoise    |
| ENSMUSG00000049470 | Aff4          | 93736  | turquoise    |
| ENSMUSG00000020808 | Fam64a        | 109212 | magenta      |
| ENSMUSG00000094886 | NA            | NA     | turquoise    |
| ENSMUSG00000049477 | NA            | NA     | brown        |
| ENSMUSG00000062981 | Mrpl42        | 67270  | midnightblue |
| ENSMUSG00000073910 | Mob3b         | 214944 | green        |
| ENSMUSG00000052471 | Gm9881        | 791288 | greenyellow  |
| ENSMUSG00000035232 | Pdk3          | 236900 | turquoise    |
| ENSMUSG00000035234 | Fam175a       | 70681  | cyan         |
| ENSMUSG00000035235 | Trim13        | 66597  | green        |
| ENSMUSG00000035236 | Scai          | 320271 | turquoise    |
| ENSMUSG00000035237 | Lcat          | 16816  | purple       |
| ENSMUSG00000063406 | Tmed5         | 73130  | yellow       |
| ENSMUSG00000020570 | Sypl          | 19027  | turquoise    |
| ENSMUSG00000020571 | Pdia6         | 71853  | yellow       |
| ENSMUSG00000020572 | Nampt         | 59027  | green        |
| ENSMUSG00000031502 | Col4a1        | 12826  | grey60       |
| ENSMUSG00000020576 | Nbas          | 71169  | turquoise    |
| ENSMUSG00000020577 | Tspan13       | 66109  | turquoise    |
| ENSMUSG00000010064 | Slc38a3       | 76257  | blue         |
| ENSMUSG00000031505 | Carkd         | 69225  | brown        |
| ENSMUSG00000010067 | Rassf1        | 56289  | lightcyan    |
| ENSMUSG00000031508 | Ankrd10       | 102334 | turquoise    |
| ENSMUSG00000107733 | NA            | NA     | blue         |
| ENSMUSG00000038780 | Smurf1        | 75788  | turquoise    |
| ENSMUSG00000028271 | Gtf2b         | 229906 | green        |
| ENSMUSG00000038784 | Cnot4         | 53621  | brown        |
| ENSMUSG00000095078 | NA            | NA     | turquoise    |
| ENSMUSG00000028273 | Pdlim5        | 56376  | turquoise    |
| ENSMUSG00000039201 | Tbc1d25       | 209815 | grey60       |
| ENSMUSG00000028274 | Rngtt         | 24018  | turquoise    |
| ENSMUSG00000039202 | NA            | NA     | blue         |
| ENSMUSG00000063171 | Rps4l         | 66184  | pink         |
| ENSMUSG00000073684 | Faap20        | 67513  | red          |
| ENSMUSG00000063172 | Hspb11        | 72938  | brown        |
| ENSMUSG00000066958 | NA            | NA     | turquoise    |
| ENSMUSG00000028277 | Ube2j1        | 56228  | turquoise    |
| ENSMUSG00000039205 | Ciz1          | 68379  | blue         |
| ENSMUSG00000028278 | Rragd         | 52187  | brown        |
| ENSMUSG00000074102 | NA            | NA     | turquoise    |
| ENSMUSG00000039206 | NA            | NA     | turquoise    |
| ENSMUSG00000039208 | NA            | NA     | turquoise    |
| ENSMUSG00000041781 | Cpsf2         | 51786  | green        |
| ENSMUSG00000100222 | NA            | NA     | tan          |
| ENSMUSG00000063179 | Pstk          | 214580 | brown        |
| ENSMUSG00000024542 | Cep192        | 70799  | green        |

|                    |               |           |           |
|--------------------|---------------|-----------|-----------|
| ENSMUSG00000074108 | NA            | NA        | brown     |
| ENSMUSG00000052712 | BC004004      | 80748     | turquoise |
| ENSMUSG00000052713 | Zfp608        | 269023    | yellow    |
| ENSMUSG00000100228 | NA            | NA        | brown     |
| ENSMUSG00000042202 | Slc35e2       | 320541    | turquoise |
| ENSMUSG00000024548 | Setbp1        | 240427    | brown     |
| ENSMUSG00000031278 | Acsl4         | 50790     | turquoise |
| ENSMUSG00000014039 | Prdm15        | 114604    | blue      |
| ENSMUSG00000042207 | NA            | NA        | turquoise |
| ENSMUSG00000020811 | Wscd1         | 216881    | turquoise |
| ENSMUSG00000042208 | 0610010F05Rik | 71675     | blue      |
| ENSMUSG00000020814 | Mxra7         | 67622     | blue      |
| ENSMUSG00000020817 | Rabep1        | 54189     | turquoise |
| ENSMUSG00000020818 | Mfsd11        | 69900     | turquoise |
| ENSMUSG00000059995 | Atxn7l3       | 217218    | turquoise |
| ENSMUSG00000049482 | Ctu2          | 66965     | blue      |
| ENSMUSG00000010307 | Tmem86a       | 67893     | turquoise |
| ENSMUSG00000084381 | AA413626      | 100359413 | turquoise |
| ENSMUSG00000084383 | NA            | NA        | turquoise |
| ENSMUSG00000084384 | NA            | NA        | turquoise |
| ENSMUSG00000049488 | Tmem67        | 329795    | turquoise |
| ENSMUSG00000049489 | Fam58b        | 69109     | blue      |
| ENSMUSG00000095315 | NA            | NA        | blue      |
| ENSMUSG00000067148 | Polr1c        | 20016     | blue      |
| ENSMUSG00000045751 | Mms22l        | 212377    | red       |
| ENSMUSG00000045752 | Tssc4         | 56844     | blue      |
| ENSMUSG00000052482 | NA            | NA        | turquoise |
| ENSMUSG00000063410 | Stk24         | 223255    | turquoise |
| ENSMUSG00000035242 | Oaz1          | 18245     | black     |
| ENSMUSG00000018001 | Cyth3         | 19159     | green     |
| ENSMUSG00000028514 | Usp24         | 329908    | yellow    |
| ENSMUSG00000062997 | NA            | NA        | black     |
| ENSMUSG00000063412 | NA            | NA        | red       |
| ENSMUSG00000028517 | Plpp3         | 67916     | red       |
| ENSMUSG00000035245 | Eogt          | 101351    | yellow    |
| ENSMUSG00000028518 | Prkaa2        | 108079    | turquoise |
| ENSMUSG00000035246 | Pcyt1b        | 236899    | turquoise |
| ENSMUSG00000035247 | Hectd1        | 207304    | green     |
| ENSMUSG00000052488 | Cherp         | 27967     | black     |
| ENSMUSG00000028519 | Dab1          | 13131     | yellow    |
| ENSMUSG00000035248 | Zcchc6        | 214290    | brown     |
| ENSMUSG00000020580 | Rock2         | 19878     | brown     |
| ENSMUSG00000031511 | Arhgef7       | 54126     | green     |
| ENSMUSG00000020585 | Laptm4a       | 17775     | turquoise |
| ENSMUSG00000003344 | Btbd2         | 208198    | turquoise |
| ENSMUSG00000021000 | Ctage5        | 217615    | blue      |
| ENSMUSG00000031513 | Leprotil1     | 68192     | turquoise |
| ENSMUSG00000013858 | Tmem259       | 216157    | turquoise |
| ENSMUSG00000003346 | Abhd17a       | 216169    | turquoise |
| ENSMUSG00000021003 | Galc          | 14420     | turquoise |
| ENSMUSG00000031516 | Dctn6         | 22428     | turquoise |
| ENSMUSG00000003348 | Mob3a         | 208228    | turquoise |
| ENSMUSG00000031517 | Gpm6a         | 234267    | red       |
| ENSMUSG00000021007 | Spata7        | 104871    | blue      |

|                    |               |        |             |
|--------------------|---------------|--------|-------------|
| ENSMUSG00000107741 | NA            | NA     | turquoise   |
| ENSMUSG00000021009 | Ptpn21        | 24000  | brown       |
| ENSMUSG00000107747 | NA            | NA     | yellow      |
| ENSMUSG00000028282 | Casp8ap2      | 26885  | blue        |
| ENSMUSG00000039210 | Gpatch2       | 67769  | turquoise   |
| ENSMUSG00000028284 | Map3k7        | 26409  | blue        |
| ENSMUSG00000049728 | Zfp668        | 244219 | brown       |
| ENSMUSG00000028289 | Epha7         | 13841  | brown       |
| ENSMUSG00000039217 | Il18          | 16173  | red         |
| ENSMUSG00000039218 | Srrm2         | 75956  | blue        |
| ENSMUSG00000056459 | Zbtb25        | 109929 | turquoise   |
| ENSMUSG00000039219 | Arid4b        | 94246  | yellow      |
| ENSMUSG00000042210 | Abhd14a       | 68644  | yellow      |
| ENSMUSG00000031283 | Chrdl1        | 83453  | blue        |
| ENSMUSG00000024556 | Me2           | 107029 | magenta     |
| ENSMUSG00000042211 | Fbxo38        | 107035 | turquoise   |
| ENSMUSG00000031284 | Pak3          | 18481  | red         |
| ENSMUSG00000031285 | Dcx           | 13193  | cyan        |
| ENSMUSG00000024558 | Mapk4         | 225724 | green       |
| ENSMUSG00000052727 | Map1b         | 17755  | green       |
| ENSMUSG00000042215 | Bag2          | 213539 | cyan        |
| ENSMUSG00000020821 | Kif1c         | 16562  | brown       |
| ENSMUSG00000020823 | Sec14l1       | 74136  | yellow      |
| ENSMUSG00000020827 | Mink1         | 50932  | yellow      |
| ENSMUSG00000020828 | Pld2          | 18806  | greenyellow |
| ENSMUSG00000020829 | Slc46a1       | 52466  | yellow      |
| ENSMUSG00000067150 | Xpo5          | 72322  | green       |
| ENSMUSG00000103780 | NA            | NA     | brown       |
| ENSMUSG00000095325 | Zfp870        | 240066 | turquoise   |
| ENSMUSG00000007080 | Pole          | 18973  | salmon      |
| ENSMUSG00000028521 | NA            | NA     | blue        |
| ENSMUSG00000104204 | NA            | NA     | turquoise   |
| ENSMUSG00000028522 | Mier1         | 71148  | turquoise   |
| ENSMUSG00000028524 | Sgip1         | 73094  | turquoise   |
| ENSMUSG00000018012 | Rac3          | 170758 | turquoise   |
| ENSMUSG00000028525 | Pde4b         | 18578  | turquoise   |
| ENSMUSG00000045767 | B230219D22Ril | 78521  | salmon      |
| ENSMUSG00000028527 | Ak4           | 11639  | turquoise   |
| ENSMUSG00000020590 | Snx13         | 217463 | turquoise   |
| ENSMUSG00000020591 | Ntsr2         | 18217  | purple      |
| ENSMUSG00000020593 | Lpin1         | 14245  | lightcyan   |
| ENSMUSG00000020594 | Pum2          | 80913  | red         |
| ENSMUSG00000031521 | Aga           | 11593  | turquoise   |
| ENSMUSG00000021010 | Npas3         | 27386  | turquoise   |
| ENSMUSG00000031523 | Dlc1          | 50768  | turquoise   |
| ENSMUSG00000021012 | Zc3h14        | 75553  | blue        |
| ENSMUSG00000020598 | Nrcam         | 319504 | purple      |
| ENSMUSG00000021013 | Ttc8          | 76260  | turquoise   |
| ENSMUSG00000031527 | Eri1          | 67276  | red         |
| ENSMUSG00000031529 | Tnks          | 21951  | turquoise   |
| ENSMUSG00000021018 | Polr2h        | 245841 | red         |
| ENSMUSG00000028291 | Akirin2       | 433693 | green       |
| ENSMUSG00000095098 | NA            | NA     | green       |
| ENSMUSG00000028292 | Rars2         | 109093 | blue        |

|                    |               |    |        |              |
|--------------------|---------------|----|--------|--------------|
| ENSMUSG00000039220 | Ppp1r10       |    | 52040  | brown        |
| ENSMUSG00000028293 | Slc35a1       |    | 24060  | brown        |
| ENSMUSG00000039221 | Rpl22l1       |    | 68028  | midnightblue |
| ENSMUSG00000028295 | Smim8         |    | 66291  | blue         |
| ENSMUSG00000066979 | Bub3          |    | 12237  | brown        |
| ENSMUSG00000091363 | NA            | NA |        | brown        |
| ENSMUSG00000049739 | Zfp646        |    | 233905 | blue         |
| ENSMUSG00000017831 | Rab5a         |    | 271457 | turquoise    |
| ENSMUSG00000024560 | Cxxc1         |    | 74322  | green        |
| ENSMUSG00000024561 | Mbd1          |    | 17190  | yellow       |
| ENSMUSG00000031290 | Lrch2         |    | 210297 | turquoise    |
| ENSMUSG00000024563 | NA            | NA |        | blue         |
| ENSMUSG00000074129 | Rpl13a        |    | 22121  | black        |
| ENSMUSG00000024565 | Sall3         |    | 20689  | brown        |
| ENSMUSG00000017837 | Nkiras2       |    | 71966  | pink         |
| ENSMUSG00000024566 | Atp9b         |    | 50771  | turquoise    |
| ENSMUSG00000080902 | NA            | NA |        | blue         |
| ENSMUSG00000031295 | Phka2         |    | 110094 | turquoise    |
| ENSMUSG00000080904 | NA            | NA |        | turquoise    |
| ENSMUSG00000042225 | NA            | NA |        | blue         |
| ENSMUSG00000052738 | Suclg1        |    | 56451  | brown        |
| ENSMUSG00000031299 | Pdha1         |    | 18597  | midnightblue |
| ENSMUSG00000020831 | 0610010K14Rik |    | 104457 | lightcyan    |
| ENSMUSG00000020832 | Eral1         |    | 57837  | blue         |
| ENSMUSG00000042229 | NA            | NA |        | turquoise    |
| ENSMUSG00000020834 | Dhrs13        |    | 70451  | turquoise    |
| ENSMUSG00000067161 | NA            | NA |        | pink         |
| ENSMUSG00000103793 | Pcdhga6       |    | 93714  | turquoise    |
| ENSMUSG00000028530 | Jak1          |    | 16451  | green        |
| ENSMUSG00000088609 | NA            | NA |        | turquoise    |
| ENSMUSG00000028532 | Cachd1        |    | 320508 | turquoise    |
| ENSMUSG00000104218 | NA            | NA |        | lightcyan    |
| ENSMUSG00000007097 | Atp1a2        |    | 98660  | purple       |
| ENSMUSG00000035266 | Helq          |    | 191578 | yellow       |
| ENSMUSG00000091604 | NA            | NA |        | yellow       |
| ENSMUSG00000056708 | Ier5          |    | 15939  | green        |
| ENSMUSG00000035268 | Pkig          |    | 18769  | blue         |
| ENSMUSG00000024800 | Rpp30         |    | 54364  | blue         |
| ENSMUSG00000003360 | Ddx23         |    | 74351  | blue         |
| ENSMUSG00000070167 | NA            | NA |        | lightcyan    |
| ENSMUSG00000063439 | B9d2          |    | 232987 | green        |
| ENSMUSG00000003363 | Pld3          |    | 18807  | turquoise    |
| ENSMUSG00000031532 | Saraf         |    | 67887  | purple       |
| ENSMUSG00000024805 | Pcgf5         |    | 76073  | blue         |
| ENSMUSG00000013878 | Rnf170        |    | 77733  | turquoise    |
| ENSMUSG00000031533 | Mrps31        |    | 57312  | blue         |
| ENSMUSG00000031534 | Smim19        |    | 102032 | yellow       |
| ENSMUSG00000010095 | Slc3a2        |    | 17254  | yellow       |
| ENSMUSG00000024807 | Syvn1         |    | 74126  | yellow       |
| ENSMUSG00000021022 | Ppp2r3c       |    | 59032  | salmon       |
| ENSMUSG00000021023 | 1110008L16Rik |    | 66132  | turquoise    |
| ENSMUSG00000031536 | Polb          |    | 18970  | turquoise    |
| ENSMUSG00000010097 | Nxf1          |    | 53319  | turquoise    |
| ENSMUSG00000021024 | Psma6         |    | 26443  | blue         |

|                    |               |        |             |
|--------------------|---------------|--------|-------------|
| ENSMUSG00000031537 | Ikkkb         | 16150  | turquoise   |
| ENSMUSG00000021025 | Nfkbia        | 18035  | brown       |
| ENSMUSG00000031539 | Ap3m2         | 64933  | turquoise   |
| ENSMUSG00000021027 | Ralgapa1      | 56784  | turquoise   |
| ENSMUSG00000021028 | Mbip          | 217588 | blue        |
| ENSMUSG00000088378 | NA            | NA     | turquoise   |
| ENSMUSG00000039230 | Tbcd          | 108903 | green       |
| ENSMUSG00000039231 | Suv39h1       | 20937  | blue        |
| ENSMUSG00000039233 | Tbce          | 70430  | yellow      |
| ENSMUSG00000056476 | Med12l        | 329650 | turquoise   |
| ENSMUSG00000024570 | Rbfa          | 68731  | green       |
| ENSMUSG00000039239 | Tgfb2         | 21808  | greenyellow |
| ENSMUSG00000100252 | 2610100L16Rik | 70441  | blue        |
| ENSMUSG00000024571 | NA            | NA     | green       |
| ENSMUSG00000017843 | Ppp2r5c       | 26931  | green       |
| ENSMUSG00000024576 | Csnk1a1       | 93687  | blue        |
| ENSMUSG00000035505 | Cox18         | 231430 | brown       |
| ENSMUSG00000080914 | NA            | NA     | turquoise   |
| ENSMUSG00000007338 | Mrpl49        | 18120  | green       |
| ENSMUSG00000024579 | Pcyox1l       | 240334 | turquoise   |
| ENSMUSG00000052748 | Swt1          | 66875  | brown       |
| ENSMUSG00000020840 | Blmh          | 104184 | red         |
| ENSMUSG00000020841 | Cpd           | 12874  | brown       |
| ENSMUSG00000020843 | Timm22        | 56322  | brown       |
| ENSMUSG00000003604 | NA            | NA     | turquoise   |
| ENSMUSG00000020846 | Fam101b       | 76566  | brown       |
| ENSMUSG00000020849 | Ywhae         | 22627  | greenyellow |
| ENSMUSG00000104222 | NA            | NA     | turquoise   |
| ENSMUSG00000028540 | Dph2          | 67728  | blue        |
| ENSMUSG00000046201 | Scaf8         | 106583 | turquoise   |
| ENSMUSG00000028546 | Elavl4        | 15572  | red         |
| ENSMUSG00000035275 | Raver2        | 242570 | turquoise   |
| ENSMUSG00000063445 | Nmral1        | 67824  | salmon      |
| ENSMUSG00000046204 | Pnma2         | 239157 | yellow      |
| ENSMUSG00000091613 | NA            | NA     | grey60      |
| ENSMUSG00000028549 | Itgb3bp       | 67733  | green       |
| ENSMUSG00000035277 | Arx           | 11878  | blue        |
| ENSMUSG00000081100 | NA            | NA     | turquoise   |
| ENSMUSG00000035278 | Plekhj1       | 78670  | red         |
| ENSMUSG00000024810 | Ii33          | 77125  | green       |
| ENSMUSG00000024811 | Tnks2         | 74493  | brown       |
| ENSMUSG00000024812 | Tjp2          | 21873  | turquoise   |
| ENSMUSG00000031540 | Kat6a         | 244349 | turquoise   |
| ENSMUSG00000014301 | Pam16         | 66449  | blue        |
| ENSMUSG00000024816 | NA            | NA     | blue        |
| ENSMUSG00000014303 | Glis2         | 83396  | turquoise   |
| ENSMUSG00000024817 | Uhrf2         | 109113 | red         |
| ENSMUSG00000031545 | Gpat4         | 102247 | green       |
| ENSMUSG00000021033 | Gstz1         | 14874  | turquoise   |
| ENSMUSG00000031546 | Gins4         | 109145 | brown       |
| ENSMUSG00000003378 | Grik5         | 14809  | turquoise   |
| ENSMUSG00000031548 | Sfrp1         | 20377  | purple      |
| ENSMUSG00000021036 | NA            | NA     | turquoise   |
| ENSMUSG00000021037 | Ahsa1         | 217737 | blue        |



|                    |               |        |              |
|--------------------|---------------|--------|--------------|
| ENSMUSG00000021038 | Vipas39       | 104799 | midnightblue |
| ENSMUSG00000021039 | Snw1          | 66354  | red          |
| ENSMUSG00000099310 | NA            | NA     | cyan         |
| ENSMUSG00000098898 | NA            | NA     | yellow       |
| ENSMUSG00000049751 | Rpl36al       | 66483  | blue         |
| ENSMUSG00000039242 | B3galnt2      | 97884  | green        |
| ENSMUSG00000049755 | Zfp672        | 319475 | turquoise    |
| ENSMUSG00000039244 | E130309D02Ril | 231868 | blue         |
| ENSMUSG00000056486 | Chn1          | 108699 | brown        |
| ENSMUSG00000074141 | Il4i1         | 14204  | red          |
| ENSMUSG00000039246 | Lyp1a1        | 226791 | turquoise    |
| ENSMUSG00000024580 | Grpel2        | 17714  | blue         |
| ENSMUSG00000024581 | Napg          | 108123 | pink         |
| ENSMUSG00000091387 | Gcnt4         | 218476 | blue         |
| ENSMUSG00000024583 | Txnl1         | 53382  | green        |
| ENSMUSG00000052751 | Repin1        | 58887  | turquoise    |
| ENSMUSG00000052752 | Traf7         | 224619 | turquoise    |
| ENSMUSG00000080921 | NA            | NA     | black        |
| ENSMUSG00000035513 | Ntng2         | 171171 | blue         |
| ENSMUSG00000017858 | Ift52         | 245866 | blue         |
| ENSMUSG00000025001 | Hells         | 15201  | salmon       |
| ENSMUSG00000024587 | Nars          | 70223  | green        |
| ENSMUSG00000024588 | Fech          | 14151  | turquoise    |
| ENSMUSG00000014075 | Tctex1d2      | 66061  | turquoise    |
| ENSMUSG00000024589 | Nedd4l        | 83814  | blue         |
| ENSMUSG00000035517 | Tdrd7         | 100121 | turquoise    |
| ENSMUSG00000014077 | Chp1          | 56398  | turquoise    |
| ENSMUSG00000042246 | Tmc7          | 209760 | turquoise    |
| ENSMUSG00000025006 | NA            | NA     | yellow       |
| ENSMUSG00000080928 | NA            | NA     | red          |
| ENSMUSG00000020850 | Prpf8         | 192159 | blue         |
| ENSMUSG00000025007 | Aldh18a1      | 56454  | red          |
| ENSMUSG00000025008 | Tctn3         | 67590  | turquoise    |
| ENSMUSG00000042249 | Adrbk2        | 320129 | turquoise    |
| ENSMUSG00000099083 | NA            | NA     | turquoise    |
| ENSMUSG00000020857 | Nme2          | 18103  | red          |
| ENSMUSG00000020859 | Spag9         | 70834  | yellow       |
| ENSMUSG00000028550 | Atg4c         | 242557 | blue         |
| ENSMUSG00000067189 | NA            | NA     | brown        |
| ENSMUSG00000028551 | Cdkn2c        | 12580  | magenta      |
| ENSMUSG00000028552 | Eps15         | 13858  | brown        |
| ENSMUSG00000018040 | Rrp7a         | 74778  | turquoise    |
| ENSMUSG00000063450 | Syne2         | 319565 | green        |
| ENSMUSG00000045795 | Whamm         | 434204 | turquoise    |
| ENSMUSG00000018042 | Cyb5r3        | 109754 | turquoise    |
| ENSMUSG00000056724 | Nbeal2        | 235627 | turquoise    |
| ENSMUSG00000035284 | Vps13c        | 320528 | turquoise    |
| ENSMUSG00000028556 | Dock7         | 67299  | brown        |
| ENSMUSG00000028557 | Rnf11         | 29864  | blue         |
| ENSMUSG00000035285 | Nat14         | 269854 | yellow       |
| ENSMUSG00000045799 | NA            | NA     | red          |
| ENSMUSG00000063455 | D630045J12Ril | 330286 | blue         |
| ENSMUSG00000028559 | Osbpl9        | 100273 | turquoise    |
| ENSMUSG00000081111 | NA            | NA     | black        |

|                    |               |           |              |
|--------------------|---------------|-----------|--------------|
| ENSMUSG00000063457 | Rps15         | 20054     | black        |
| ENSMUSG00000091625 | Lsm5          | 66373     | red          |
| ENSMUSG00000003380 | Rabac1        | 14470     | blue         |
| ENSMUSG00000081113 | NA            | NA        | magenta      |
| ENSMUSG00000003382 | Etv3          | 27049     | turquoise    |
| ENSMUSG00000024824 | Rad9a         | 19367     | blue         |
| ENSMUSG00000021040 | Slirp         | 380773    | midnightblue |
| ENSMUSG00000024826 | Dpf2          | 19708     | blue         |
| ENSMUSG00000014313 | Cox6c         | 12864     | midnightblue |
| ENSMUSG00000024827 | Gldc          | 104174    | greenyellow  |
| ENSMUSG00000031555 | Adam9         | 11502     | pink         |
| ENSMUSG00000031556 | Tm2d2         | 69742     | turquoise    |
| ENSMUSG00000024829 | Mrpl21        | 353242    | blue         |
| ENSMUSG00000021044 | Adck1         | 72113     | turquoise    |
| ENSMUSG00000021047 | Nova1         | 664883    | green        |
| ENSMUSG00000021048 | Mthfd1        | 108156    | green        |
| ENSMUSG00000099320 | Mir7664       | 102465989 | turquoise    |
| ENSMUSG00000049760 | 2410015M20Ril | 224904    | midnightblue |
| ENSMUSG00000107788 | NA            | NA        | turquoise    |
| ENSMUSG00000108204 | NA            | NA        | tan          |
| ENSMUSG00000049764 | Zfp280b       | 64453     | blue         |
| ENSMUSG00000039253 | Fn3krp        | 238024    | turquoise    |
| ENSMUSG00000039254 | Pomt1         | 99011     | blue         |
| ENSMUSG00000067424 | NA            | NA        | turquoise    |
| ENSMUSG00000017861 | Mybl2         | 17865     | magenta      |
| ENSMUSG00000024590 | Lmnbl         | 16906     | red          |
| ENSMUSG00000024592 | C330018D20Ril | 77422     | green        |
| ENSMUSG00000024593 | Megf10        | 70417     | purple       |
| ENSMUSG00000024594 | Prrc1         | 73137     | blue         |
| ENSMUSG00000035521 | Gnptg         | 214505    | turquoise    |
| ENSMUSG00000052763 | Zfp212        | 232784    | blue         |
| ENSMUSG00000025010 | Ccnj          | 240665    | cyan         |
| ENSMUSG00000080932 | NA            | NA        | black        |
| ENSMUSG00000080935 | NA            | NA        | blue         |
| ENSMUSG00000052769 | NA            | NA        | turquoise    |
| ENSMUSG00000025016 | Tm9sf3        | 107358    | greenyellow  |
| ENSMUSG00000035529 | Prdm4         | 72843     | turquoise    |
| ENSMUSG00000070426 | Rnf121        | 75212     | blue         |
| ENSMUSG00000025019 | Lcor          | 212391    | brown        |
| ENSMUSG00000020863 | Luc7l3        | 67684     | yellow       |
| ENSMUSG00000020864 | Ankrd40       | 71452     | blue         |
| ENSMUSG00000003623 | Crot          | 74114     | yellow       |
| ENSMUSG00000020868 | Xylt2         | 217119    | turquoise    |
| ENSMUSG00000020869 | Lrrc59        | 98238     | salmon       |
| ENSMUSG00000067194 | NA            | NA        | black        |
| ENSMUSG00000095362 | NA            | NA        | brown        |
| ENSMUSG00000028560 | Usp1          | 230484    | magenta      |
| ENSMUSG00000078126 | NA            | NA        | black        |
| ENSMUSG00000028563 | Tm2d1         | 94043     | brown        |
| ENSMUSG00000035293 | G2e3          | 217558    | magenta      |
| ENSMUSG00000028565 | Nfia          | 18027     | green        |
| ENSMUSG00000028567 | Txndc12       | 66073     | green        |
| ENSMUSG00000035295 | Wdr38         | 76646     | turquoise    |
| ENSMUSG00000028568 | Btf3l4        | 70533     | black        |

|                    |          |    |        |              |
|--------------------|----------|----|--------|--------------|
| ENSMUSG00000035297 | Cops4    |    | 26891  | black        |
| ENSMUSG00000081121 | NA       | NA |        | turquoise    |
| ENSMUSG00000035299 | Mid1     |    | 17318  | turquoise    |
| ENSMUSG00000024830 | Rps6kb2  |    | 58988  | turquoise    |
| ENSMUSG00000024831 | NA       | NA |        | turquoise    |
| ENSMUSG00000046229 | Scand1   |    | 19018  | green        |
| ENSMUSG00000100514 | NA       | NA |        | turquoise    |
| ENSMUSG00000024833 | Pola2    |    | 18969  | salmon       |
| ENSMUSG00000091639 | NA       | NA |        | red          |
| ENSMUSG00000031561 | Tenm3    |    | 23965  | yellow       |
| ENSMUSG00000031562 | Dctd     |    | 320685 | brown        |
| ENSMUSG00000024835 | Coro1b   |    | 23789  | turquoise    |
| ENSMUSG00000031563 | NA       | NA |        | turquoise    |
| ENSMUSG00000081128 | NA       | NA |        | green        |
| ENSMUSG00000021051 | Ppp2r5e  |    | 26932  | brown        |
| ENSMUSG00000031565 | Fgfr1    |    | 14182  | yellow       |
| ENSMUSG00000021054 | Sgpp1    |    | 81535  | brown        |
| ENSMUSG00000031568 | Rwdd4a   |    | 192174 | black        |
| ENSMUSG00000107796 | NA       | NA |        | yellow       |
| ENSMUSG00000067430 | Zfp763   |    | 73451  | turquoise    |
| ENSMUSG00000039262 | Prrc2b   |    | 227723 | blue         |
| ENSMUSG00000049775 | Tmsb4x   |    | 19241  | purple       |
| ENSMUSG00000039263 | Npepl1   |    | 228961 | turquoise    |
| ENSMUSG00000095600 | NA       | NA |        | pink         |
| ENSMUSG00000074165 | Zfp788   |    | 67607  | turquoise    |
| ENSMUSG00000028800 | Hdac1    |    | 433759 | blue         |
| ENSMUSG00000074166 | AW146154 |    | 101835 | turquoise    |
| ENSMUSG00000035530 | Eif1     |    | 20918  | midnightblue |
| ENSMUSG00000028804 | Csmd2    |    | 329942 | blue         |
| ENSMUSG00000080941 | NA       | NA |        | turquoise    |
| ENSMUSG00000025020 | Slit1    |    | 20562  | blue         |
| ENSMUSG00000080942 | NA       | NA |        | turquoise    |
| ENSMUSG00000080944 | NA       | NA |        | lightcyan    |
| ENSMUSG00000025024 | Smndc1   |    | 76479  | brown        |
| ENSMUSG00000028809 | Srrm1    |    | 51796  | brown        |
| ENSMUSG00000025025 | Mxi1     |    | 17859  | yellow       |
| ENSMUSG00000025026 | Add3     |    | 27360  | grey60       |
| ENSMUSG00000020870 | NA       | NA |        | brown        |
| ENSMUSG00000025027 | Xpnpep1  |    | 170750 | red          |
| ENSMUSG00000070436 | Serpinh1 |    | 12406  | turquoise    |
| ENSMUSG00000020873 | NA       | NA |        | brown        |
| ENSMUSG00000010362 | Rdm1     |    | 66599  | brown        |
| ENSMUSG00000031802 | Phxr4    |    | 18689  | turquoise    |
| ENSMUSG00000020876 | Snx11    |    | 74479  | turquoise    |
| ENSMUSG00000031807 | Pgls     |    | 66171  | black        |
| ENSMUSG00000031808 | Slc27a1  |    | 26457  | red          |
| ENSMUSG00000078134 | NA       | NA |        | red          |
| ENSMUSG00000104253 | NA       | NA |        | turquoise    |
| ENSMUSG00000073982 | Rhog     |    | 56212  | turquoise    |
| ENSMUSG00000028573 | Fggy     |    | 75578  | turquoise    |
| ENSMUSG00000078139 | NA       | NA |        | brown        |
| ENSMUSG00000084910 | NA       | NA |        | black        |
| ENSMUSG00000084911 | NA       | NA |        | turquoise    |
| ENSMUSG00000073985 | NA       | NA |        | turquoise    |

|                    |         |        |             |
|--------------------|---------|--------|-------------|
| ENSMUSG00000028576 | Ift74   | 67694  | blue        |
| ENSMUSG00000028577 | NA      | NA     | blue        |
| ENSMUSG00000073987 | NA      | NA     | turquoise   |
| ENSMUSG00000028578 | Caap1   | 67770  | turquoise   |
| ENSMUSG00000056749 | Nfil3   | 18030  | cyan        |
| ENSMUSG00000018068 | Ints2   | 70422  | red         |
| ENSMUSG00000039509 | Nup133  | 234865 | red         |
| ENSMUSG00000074405 | Zfp865  | 319748 | turquoise   |
| ENSMUSG00000024841 | Eif1ad  | 69860  | red         |
| ENSMUSG00000074406 | Zfp628  | 232816 | brown       |
| ENSMUSG00000031570 | Plpp5   | 71910  | turquoise   |
| ENSMUSG00000024843 | Chka    | 12660  | yellow      |
| ENSMUSG00000024844 | Banf1   | 23825  | black       |
| ENSMUSG00000007603 | Dus3l   | 224907 | red         |
| ENSMUSG00000081137 | NA      | NA     | turquoise   |
| ENSMUSG00000024845 | NA      | NA     | green       |
| ENSMUSG00000042500 | Ago4    | 76850  | turquoise   |
| ENSMUSG00000031574 | NA      | NA     | yellow      |
| ENSMUSG00000024847 | Aip     | 11632  | blue        |
| ENSMUSG00000031575 | Ash2l   | 23808  | blue        |
| ENSMUSG00000042502 | Cd2bp2  | 70233  | red         |
| ENSMUSG00000031577 | Tti2    | 234138 | brown       |
| ENSMUSG00000021065 | Fut8    | 53618  | yellow      |
| ENSMUSG00000031578 | Mak16   | 67920  | red         |
| ENSMUSG00000042505 | NA      | NA     | brown       |
| ENSMUSG00000021066 | Atl1    | 73991  | turquoise   |
| ENSMUSG00000042506 | Usp22   | 216825 | green       |
| ENSMUSG00000042507 | Elmsan1 | 238317 | turquoise   |
| ENSMUSG00000021067 | Sav1    | 64010  | brown       |
| ENSMUSG00000021068 | Nin     | 18080  | salmon      |
| ENSMUSG00000042508 | Dmtf1   | 23857  | blue        |
| ENSMUSG00000099342 | NA      | NA     | turquoise   |
| ENSMUSG00000010607 | Pigyl   | 66268  | blue        |
| ENSMUSG00000039270 | NA      | NA     | red         |
| ENSMUSG00000010608 | Rbm25   | 67039  | blue        |
| ENSMUSG00000010609 | Psen2   | 19165  | turquoise   |
| ENSMUSG00000074170 | Plekhf1 | 72287  | turquoise   |
| ENSMUSG00000039275 | Foxk2   | 68837  | green       |
| ENSMUSG00000039278 | Pcsk1n  | 30052  | brown       |
| ENSMUSG00000028811 | Yars    | 107271 | blue        |
| ENSMUSG00000052783 | Grk4    | 14772  | turquoise   |
| ENSMUSG00000042271 | Nxt2    | 237082 | blue        |
| ENSMUSG00000042272 | Sestd1  | 228071 | cyan        |
| ENSMUSG00000035545 | Leng8   | 232798 | pink        |
| ENSMUSG00000063714 | NA      | NA     | blue        |
| ENSMUSG00000025034 | Trim8   | 93679  | yellow      |
| ENSMUSG00000035547 | Capn5   | 12337  | turquoise   |
| ENSMUSG00000070443 | NA      | NA     | greenyellow |
| ENSMUSG00000025035 | Arl3    | 56350  | black       |
| ENSMUSG00000025036 | Sfxn2   | 94279  | brown       |
| ENSMUSG00000053205 | NA      | NA     | turquoise   |
| ENSMUSG00000025037 | Maoa    | 17161  | yellow      |
| ENSMUSG00000020882 | Cacnb1  | 12295  | turquoise   |
| ENSMUSG00000020883 | Fbxl20  | 72194  | pink        |

|                    |               |        |              |
|--------------------|---------------|--------|--------------|
| ENSMUSG00000053208 | NA            | NA     | brown        |
| ENSMUSG00000031812 | NA            | NA     | turquoise    |
| ENSMUSG00000020886 | Dlg4          | 13385  | turquoise    |
| ENSMUSG00000031813 | Mvb12a        | 73711  | brown        |
| ENSMUSG00000021302 | Ggps1         | 14593  | brown        |
| ENSMUSG00000020888 | Dvl2          | 13543  | green        |
| ENSMUSG00000020889 | Nr1d1         | 217166 | blue         |
| ENSMUSG00000010376 | Nedd8         | 18002  | black        |
| ENSMUSG00000031816 | Mthfsd        | 234814 | grey60       |
| ENSMUSG00000031818 | Cox4i1        | 12857  | turquoise    |
| ENSMUSG00000021306 | Gpr137b       | 83924  | turquoise    |
| ENSMUSG00000031819 | Emc8          | 18117  | brown        |
| ENSMUSG00000028580 | Pum1          | 80912  | black        |
| ENSMUSG00000028582 | Cc2d1b        | 319965 | brown        |
| ENSMUSG00000028583 | Pdpn          | 14726  | yellow       |
| ENSMUSG00000063480 | Nhp2l1        | 20826  | black        |
| ENSMUSG00000039512 | Uhrf1bp1      | 224648 | brown        |
| ENSMUSG00000046240 | Hepacam       | 72927  | purple       |
| ENSMUSG00000029001 | Fbxo44        | 230903 | yellow       |
| ENSMUSG00000028587 | Orc1          | 18392  | brown        |
| ENSMUSG00000039515 | Ppp2r4        | 110854 | brown        |
| ENSMUSG00000084925 | 1810062O18Rik | 75602  | turquoise    |
| ENSMUSG00000074412 | NA            | NA     | blue         |
| ENSMUSG00000029003 | Mad2l2        | 71890  | yellow       |
| ENSMUSG00000018076 | Med13l        | 76199  | turquoise    |
| ENSMUSG00000029004 | Kmt2e         | 69188  | turquoise    |
| ENSMUSG00000091655 | NA            | NA     | black        |
| ENSMUSG00000063488 | Zkscan7       | 382118 | brown        |
| ENSMUSG00000074415 | 3110039I08Rik | 73144  | yellow       |
| ENSMUSG00000039519 | Cyp7b1        | 13123  | purple       |
| ENSMUSG00000024851 | Pitpnm1       | 18739  | turquoise    |
| ENSMUSG00000007610 | Gtpbp3        | 70359  | turquoise    |
| ENSMUSG00000024853 | Sf3b2         | 319322 | black        |
| ENSMUSG00000007613 | Tgfbr1        | 21812  | red          |
| ENSMUSG00000031583 | Wrn           | 22427  | blue         |
| ENSMUSG00000024856 | Cdk2ap2       | 52004  | turquoise    |
| ENSMUSG00000021071 | Trim9         | 94090  | blue         |
| ENSMUSG00000031584 | Gsr           | 14782  | blue         |
| ENSMUSG00000021072 | Tmx1          | 72736  | brown        |
| ENSMUSG00000031585 | Gtf2e2        | 68153  | magenta      |
| ENSMUSG00000024858 | Adrbk1        | 110355 | blue         |
| ENSMUSG00000007617 | NA            | NA     | turquoise    |
| ENSMUSG00000032002 | Dcun1d5       | 76863  | red          |
| ENSMUSG00000042515 | Mum1l1        | 245631 | brown        |
| ENSMUSG00000021076 | Actr10        | 56444  | midnightblue |
| ENSMUSG00000014349 | Ube2z         | 268470 | turquoise    |
| ENSMUSG00000021079 | Timm9         | 30056  | green        |
| ENSMUSG00000032009 | Sesn3         | 75747  | turquoise    |
| ENSMUSG00000108231 | NA            | NA     | brown        |
| ENSMUSG00000049792 | Bag5          | 70369  | green        |
| ENSMUSG00000108238 | NA            | NA     | pink         |
| ENSMUSG00000039285 | Azi2          | 27215  | blue         |
| ENSMUSG00000074182 | Znhit6        | 229937 | blue         |
| ENSMUSG00000028820 | Sfpq          | 71514  | red          |

|                    |               |        |             |
|--------------------|---------------|--------|-------------|
| ENSMUSG00000028821 | Syf2          | 68592  | turquoise   |
| ENSMUSG00000028822 | Tmem50a       | 71817  | blue        |
| ENSMUSG00000104504 | NA            | NA     | pink        |
| ENSMUSG00000035551 | Igfbpl1       | 75426  | cyan        |
| ENSMUSG00000052794 | 1700030K09Rik | 72254  | red         |
| ENSMUSG00000025040 | Fundc1        | 72018  | turquoise   |
| ENSMUSG00000080962 | NA            | NA     | yellow      |
| ENSMUSG00000104507 | NA            | NA     | turquoise   |
| ENSMUSG00000025041 | Nt5c2         | 76952  | blue        |
| ENSMUSG00000028826 | Tmem57        | 66146  | turquoise   |
| ENSMUSG00000080966 | NA            | NA     | turquoise   |
| ENSMUSG00000052798 | Nup107        | 103468 | red         |
| ENSMUSG00000035559 | Mpv17l2       | 234384 | turquoise   |
| ENSMUSG00000080968 | NA            | NA     | salmon      |
| ENSMUSG00000025047 | Pdcd11        | 18572  | turquoise   |
| ENSMUSG00000080969 | NA            | NA     | lightcyan   |
| ENSMUSG00000020893 | Per1          | 18626  | turquoise   |
| ENSMUSG00000031820 | Babam1        | 68251  | green       |
| ENSMUSG00000020894 | Vamp2         | 22318  | pink        |
| ENSMUSG00000020895 | Tmem107       | 66910  | blue        |
| ENSMUSG00000031822 | Gse1          | 382034 | red         |
| ENSMUSG00000031823 | Zdhhc7        | 102193 | green       |
| ENSMUSG00000021311 | Mtr           | 238505 | turquoise   |
| ENSMUSG00000020897 | Aurkb         | 20877  | magenta     |
| ENSMUSG00000020898 | Ctc1          | 68964  | salmon      |
| ENSMUSG00000020899 | Pfas          | 237823 | pink        |
| ENSMUSG00000031826 | Usp10         | 22224  | red         |
| ENSMUSG00000021314 | Amph          | 218038 | yellow      |
| ENSMUSG00000031827 | Cotl1         | 72042  | greenyellow |
| ENSMUSG00000031828 | Klhl36        | 234796 | turquoise   |
| ENSMUSG00000021318 | Gli3          | 14634  | yellow      |
| ENSMUSG00000078151 | NA            | NA     | blue        |
| ENSMUSG00000078153 | NA            | NA     | turquoise   |
| ENSMUSG00000078154 | NA            | NA     | green       |
| ENSMUSG00000056763 | Cspp1         | 211660 | turquoise   |
| ENSMUSG00000039523 | Cep104        | 230967 | green       |
| ENSMUSG00000028597 | NA            | NA     | turquoise   |
| ENSMUSG00000029012 | Orc5          | 26429  | blue        |
| ENSMUSG00000029014 | Dnajc2        | 22791  | red         |
| ENSMUSG00000081153 | NA            | NA     | pink        |
| ENSMUSG00000029016 | Clcn6         | 26372  | turquoise   |
| ENSMUSG00000029017 | Pmpcb         | 73078  | brown       |
| ENSMUSG00000024862 | Klc2          | 16594  | brown       |
| ENSMUSG00000031590 | Frg1          | 14300  | brown       |
| ENSMUSG00000031591 | Asah1         | 11886  | turquoise   |
| ENSMUSG00000031592 | Pcm1          | 18536  | red         |
| ENSMUSG00000081157 | NA            | NA     | brown       |
| ENSMUSG00000042520 | Ubap2l        | 74383  | black       |
| ENSMUSG00000014353 | Tmem87b       | 72477  | turquoise   |
| ENSMUSG00000081159 | NA            | NA     | brown       |
| ENSMUSG00000031595 | Pdgfrl        | 68797  | turquoise   |
| ENSMUSG00000042523 | Dnal1         | 105000 | turquoise   |
| ENSMUSG00000032010 | Usp2          | 53376  | blue        |
| ENSMUSG00000031596 | Slc7a2        | 11988  | purple      |

|                    |          |    |        |             |
|--------------------|----------|----|--------|-------------|
| ENSMUSG00000014355 | Anapc1   |    | 17222  | red         |
| ENSMUSG00000024869 | Nudt8    |    | 66387  | turquoise   |
| ENSMUSG00000042524 | Sun2     |    | 223697 | turquoise   |
| ENSMUSG00000032011 | Thy1     |    | 21838  | turquoise   |
| ENSMUSG00000021087 | Rtn1     |    | 104001 | purple      |
| ENSMUSG00000032014 | Oaf      |    | 102644 | black       |
| ENSMUSG00000032018 | Sc5d     |    | 235293 | turquoise   |
| ENSMUSG00000039294 | BC017643 |    | 217370 | yellow      |
| ENSMUSG00000039298 | Cdk5rap2 |    | 214444 | blue        |
| ENSMUSG00000028830 | AU040320 |    | 100317 | brown       |
| ENSMUSG00000035560 | Wdr20rt  |    | 70948  | brown       |
| ENSMUSG00000028832 | Stmn1    |    | 16765  | red         |
| ENSMUSG00000104514 | NA       | NA |        | pink        |
| ENSMUSG00000028833 | Ncdn     |    | 26562  | blue        |
| ENSMUSG00000035561 | Aldh1b1  |    | 72535  | cyan        |
| ENSMUSG00000025050 | Pcgf6    |    | 71041  | grey60      |
| ENSMUSG00000018322 | Tomm34   |    | 67145  | blue        |
| ENSMUSG00000080972 | NA       | NA |        | turquoise   |
| ENSMUSG00000042292 | Mkl1     |    | 223701 | turquoise   |
| ENSMUSG00000091900 | NA       | NA |        | blue        |
| ENSMUSG00000028837 | Psmb2    |    | 26445  | green       |
| ENSMUSG00000080974 | NA       | NA |        | tan         |
| ENSMUSG00000035566 | Pcdh17   |    | 219228 | yellow      |
| ENSMUSG00000070462 | Mesdc1   |    | 80889  | turquoise   |
| ENSMUSG00000018326 | Ywhab    |    | 54401  | yellow      |
| ENSMUSG00000080977 | NA       | NA |        | greenyellow |
| ENSMUSG00000091905 | NA       | NA |        | green       |
| ENSMUSG00000035569 | Ankrd11  |    | 77087  | turquoise   |
| ENSMUSG00000042298 | Ttc19    |    | 72795  | turquoise   |
| ENSMUSG00000003660 | Snrnp200 |    | 320632 | brown       |
| ENSMUSG00000080979 | NA       | NA |        | blue        |
| ENSMUSG00000053226 | Dand5    |    | 23863  | turquoise   |
| ENSMUSG00000025059 | Gk       |    | 14933  | yellow      |
| ENSMUSG00000003662 | Ciao1    |    | 26371  | turquoise   |
| ENSMUSG00000010392 | Gosr1    |    | 53334  | turquoise   |
| ENSMUSG00000031832 | Taf1c    |    | 21341  | turquoise   |
| ENSMUSG00000031833 | Mast3    |    | 546071 | turquoise   |
| ENSMUSG00000031834 | Pik3r2   |    | 18709  | purple      |
| ENSMUSG00000031835 | Mbtps1   |    | 56453  | red         |
| ENSMUSG00000031838 | Ifi30    |    | 65972  | turquoise   |
| ENSMUSG00000021326 | Trim27   |    | 19720  | red         |
| ENSMUSG00000031839 | Hsbp1    |    | 68196  | yellow      |
| ENSMUSG00000021327 | Zkscan3  |    | 72739  | turquoise   |
| ENSMUSG00000078162 | NA       | NA |        | turquoise   |
| ENSMUSG00000056770 | Setd3    |    | 52690  | turquoise   |
| ENSMUSG00000039530 | NA       | NA |        | blue        |
| ENSMUSG00000056772 | NA       | NA |        | lightcyan   |
| ENSMUSG00000039531 | Zufsp    |    | 72580  | turquoise   |
| ENSMUSG00000029020 | Mfn2     |    | 170731 | blue        |
| ENSMUSG00000039533 | NA       | NA |        | red         |
| ENSMUSG00000029022 | Miip     |    | 28010  | blue        |
| ENSMUSG00000039536 | Stau1    |    | 20853  | blue        |
| ENSMUSG00000084946 | NA       | NA |        | cyan        |
| ENSMUSG00000100551 | NA       | NA |        | turquoise   |

|                    |               |        |              |
|--------------------|---------------|--------|--------------|
| ENSMUSG00000024870 | Rab1b         | 76308  | midnightblue |
| ENSMUSG00000029027 | Dffb          | 13368  | turquoise    |
| ENSMUSG00000081164 | NA            | NA     | greenyellow  |
| ENSMUSG00000029028 | Lrrc47        | 72946  | turquoise    |
| ENSMUSG00000100554 | NA            | NA     | turquoise    |
| ENSMUSG00000029029 | Wrap73        | 59002  | blue         |
| ENSMUSG00000014361 | Mertk         | 17289  | purple       |
| ENSMUSG00000024875 | Yif1a         | 68090  | turquoise    |
| ENSMUSG00000021090 | Lrrc9         | 78257  | yellow       |
| ENSMUSG00000081168 | NA            | NA     | turquoise    |
| ENSMUSG00000024878 | Cbwd1         | 226043 | blue         |
| ENSMUSG00000035805 | Mlc1          | 170790 | red          |
| ENSMUSG00000021094 | Dhrs7         | 66375  | purple       |
| ENSMUSG00000042535 | Gtpbp1        | 14904  | brown        |
| ENSMUSG00000021096 | Ppm1a         | 19042  | turquoise    |
| ENSMUSG00000021097 | Clmn          | 94040  | purple       |
| ENSMUSG00000070705 | Eid2b         | 434156 | blue         |
| ENSMUSG00000032026 | Rexo2         | 104444 | blue         |
| ENSMUSG00000070709 | 1700049G17Rik | 73430  | turquoise    |
| ENSMUSG00000099377 | NA            | NA     | black        |
| ENSMUSG00000000127 | Fer           | 14158  | turquoise    |
| ENSMUSG00000085133 | NA            | NA     | turquoise    |
| ENSMUSG00000085134 | NA            | NA     | turquoise    |
| ENSMUSG00000028842 | NA            | NA     | turquoise    |
| ENSMUSG00000095648 | NA            | NA     | yellow       |
| ENSMUSG00000028843 | Sh3bgrl3      | 73723  | turquoise    |
| ENSMUSG00000035572 | Dcaf10        | 242418 | turquoise    |
| ENSMUSG00000025060 | Sik           | 20874  | turquoise    |
| ENSMUSG00000080982 | NA            | NA     | turquoise    |
| ENSMUSG00000035575 | Utp6          | 216987 | blue         |
| ENSMUSG00000018334 | Ksr1          | 16706  | turquoise    |
| ENSMUSG00000028847 | Trappc3       | 27096  | yellow       |
| ENSMUSG00000028849 | Map7d1        | 245877 | turquoise    |
| ENSMUSG00000081400 | NA            | NA     | black        |
| ENSMUSG00000025066 | Sfr1          | 67788  | blue         |
| ENSMUSG00000081402 | NA            | NA     | blue         |
| ENSMUSG00000025068 | Gsto1         | 14873  | blue         |
| ENSMUSG00000081404 | NA            | NA     | cyan         |
| ENSMUSG00000031840 | Rab3a         | 19339  | brown        |
| ENSMUSG00000081405 | NA            | NA     | turquoise    |
| ENSMUSG00000081406 | NA            | NA     | black        |
| ENSMUSG00000014601 | Strip1        | 229707 | brown        |
| ENSMUSG00000031843 | Mphosph6      | 68533  | blue         |
| ENSMUSG00000014602 | Kif1a         | 16560  | turquoise    |
| ENSMUSG00000014606 | Slc25a11      | 67863  | brown        |
| ENSMUSG00000031848 | Lsm4          | 50783  | red          |
| ENSMUSG00000021338 | Lrrc16a       | 68732  | turquoise    |
| ENSMUSG00000021339 | Mrs2          | 380836 | yellow       |
| ENSMUSG00000089103 | NA            | NA     | turquoise    |
| ENSMUSG00000104295 | NA            | NA     | turquoise    |
| ENSMUSG00000084950 | Gm5577        | 434064 | turquoise    |
| ENSMUSG00000039542 | Ncam1         | 17967  | purple       |
| ENSMUSG00000029030 | Tprgl         | 67808  | turquoise    |
| ENSMUSG00000067713 | Prkag1        | 19082  | turquoise    |



|                    |          |           |             |
|--------------------|----------|-----------|-------------|
| ENSMUSG00000029033 | Acap3    | 140500    | blue        |
| ENSMUSG00000029034 | Cpsf3l   | 71957     | black       |
| ENSMUSG00000084957 | Bbip1    | 100503572 | turquoise   |
| ENSMUSG00000029036 | Atad3a   | 108888    | blue        |
| ENSMUSG00000029038 | Ssu72    | 68991     | blue        |
| ENSMUSG00000067719 | NA       | NA        | brown       |
| ENSMUSG00000081176 | NA       | NA        | turquoise   |
| ENSMUSG00000042541 | NA       | NA        | black       |
| ENSMUSG00000081179 | NA       | NA        | cyan        |
| ENSMUSG00000007646 | Rad51c   | 114714    | blue        |
| ENSMUSG00000032030 | Cul5     | 75717     | turquoise   |
| ENSMUSG00000024889 | Rce1     | 19671     | brown       |
| ENSMUSG00000070713 | NA       | NA        | red         |
| ENSMUSG00000032035 | Ets1     | 23871     | blue        |
| ENSMUSG00000042548 | Asxl1    | 228790    | red         |
| ENSMUSG00000032038 | St3gal4  | 20443     | turquoise   |
| ENSMUSG00000060206 | Zfp462   | 242466    | blue        |
| ENSMUSG00000099385 | NA       | NA        | lightcyan   |
| ENSMUSG00000000131 | Xpo6     | 74204     | blue        |
| ENSMUSG00000000134 | Tfe3     | 209446    | green       |
| ENSMUSG00000108266 | NA       | NA        | turquoise   |
| ENSMUSG00000028850 | Gpatch3  | 242691    | brown       |
| ENSMUSG00000028851 | Nudc     | 18221     | black       |
| ENSMUSG00000018340 | Anxa6    | 11749     | greenyellow |
| ENSMUSG00000028854 | Slc9a1   | 20544     | yellow      |
| ENSMUSG00000080992 | NA       | NA        | yellow      |
| ENSMUSG00000028857 | Tmem222  | 52174     | turquoise   |
| ENSMUSG00000035585 | Tsen34   | 66078     | blue        |
| ENSMUSG00000080994 | NA       | NA        | greenyellow |
| ENSMUSG00000063754 | NA       | NA        | brown       |
| ENSMUSG00000018347 | Zkscan6  | 52712     | yellow      |
| ENSMUSG00000036002 | Fam214b  | 230088    | yellow      |
| ENSMUSG00000025076 | Casp7    | 12369     | red         |
| ENSMUSG00000046516 | Cox17    | 12856     | turquoise   |
| ENSMUSG00000063757 | NA       | NA        | turquoise   |
| ENSMUSG00000025077 | Dclre1a  | 55947     | brown       |
| ENSMUSG00000003680 | Tmem179b | 67706     | green       |
| ENSMUSG00000081413 | NA       | NA        | tan         |
| ENSMUSG00000025078 | Nhlrc2   | 66866     | green       |
| ENSMUSG00000036006 | Fam65b   | 193385    | yellow      |
| ENSMUSG00000046519 | Golph3l  | 229593    | turquoise   |
| ENSMUSG00000031851 | Ntpcr    | 66566     | turquoise   |
| ENSMUSG00000081416 | NA       | NA        | tan         |
| ENSMUSG00000021340 | NA       | NA        | purple      |
| ENSMUSG00000081418 | NA       | NA        | pink        |
| ENSMUSG00000031858 | Mau2     | 74549     | blue        |
| ENSMUSG00000078180 | NA       | NA        | tan         |
| ENSMUSG00000078183 | NA       | NA        | green       |
| ENSMUSG00000078184 | NA       | NA        | black       |
| ENSMUSG00000108506 | NA       | NA        | brown       |
| ENSMUSG00000067722 | BC003965 | 214489    | turquoise   |
| ENSMUSG00000084968 | NA       | NA        | brown       |
| ENSMUSG00000024891 | Slc29a2  | 13340     | turquoise   |
| ENSMUSG00000091697 | NA       | NA        | pink        |

|                    |               |           |              |
|--------------------|---------------|-----------|--------------|
| ENSMUSG00000029047 | Pex10         | 668173    | brown        |
| ENSMUSG00000024892 | Pcx           | 18563     | blue         |
| ENSMUSG00000029048 | Rer1          | 67830     | blue         |
| ENSMUSG00000074457 | S100a16       | 67860     | greenyellow  |
| ENSMUSG00000081185 | NA            | NA        | brown        |
| ENSMUSG00000057219 | Armc7         | 276905    | turquoise    |
| ENSMUSG00000024896 | Minpp1        | 17330     | brown        |
| ENSMUSG00000092116 | NA            | NA        | blue         |
| ENSMUSG00000081189 | NA            | NA        | blue         |
| ENSMUSG00000007656 | Arpp19        | 59046     | blue         |
| ENSMUSG00000035824 | Tk2           | 57813     | turquoise    |
| ENSMUSG00000032040 | Dcps          | 69305     | brown        |
| ENSMUSG00000032042 | Srpr          | 67398     | turquoise    |
| ENSMUSG00000025314 | Ptprj         | 19271     | brown        |
| ENSMUSG00000007659 | Bcl2l1        | 12048     | blue         |
| ENSMUSG00000035828 | Pim3          | 223775    | green        |
| ENSMUSG00000042557 | Sin3a         | 20466     | green        |
| ENSMUSG00000025316 | Banp          | 53325     | blue         |
| ENSMUSG00000042558 | Adprhl2       | 100206    | brown        |
| ENSMUSG00000032046 | Abhd12        | 76192     | blue         |
| ENSMUSG00000032047 | Acat1         | 110446    | green        |
| ENSMUSG00000060216 | Arrb2         | 216869    | brown        |
| ENSMUSG00000010651 | Acaa1b        | 235674    | turquoise    |
| ENSMUSG00000003923 | Tfam          | 21780     | green        |
| ENSMUSG00000070729 | NA            | NA        | turquoise    |
| ENSMUSG00000108270 | NA            | NA        | turquoise    |
| ENSMUSG00000000142 | Axin2         | 12006     | blue         |
| ENSMUSG00000099397 | NA            | NA        | blue         |
| ENSMUSG00000003929 | Zfp81         | 224694    | turquoise    |
| ENSMUSG00000000148 | Brat1         | 231841    | turquoise    |
| ENSMUSG00000000149 | NA            | NA        | turquoise    |
| ENSMUSG00000028861 | Mrps15        | 66407     | green        |
| ENSMUSG00000078427 | Sarnp         | 66118     | blue         |
| ENSMUSG00000085156 | Gm11974       | 100041286 | blue         |
| ENSMUSG00000028863 | Meaf6         | 70088     | brown        |
| ENSMUSG00000078429 | Ctdsp2        | 52468     | turquoise    |
| ENSMUSG00000063760 | NA            | NA        | green        |
| ENSMUSG00000070490 | NA            | NA        | greenyellow  |
| ENSMUSG00000091931 | AK010878      | 100233175 | blue         |
| ENSMUSG00000035595 | 1600002K03Rik | 69770     | blue         |
| ENSMUSG00000028868 | Wasf2         | 242687    | turquoise    |
| ENSMUSG00000035596 | Mboat7        | 77582     | turquoise    |
| ENSMUSG00000063765 | Chadl         | 214685    | yellow       |
| ENSMUSG00000035597 | Prpf39        | 328110    | turquoise    |
| ENSMUSG00000028869 | Gnl2          | 230737    | purple       |
| ENSMUSG00000070493 | Chchd2        | 14004     | midnightblue |
| ENSMUSG00000053253 | Ndfip2        | 76273     | blue         |
| ENSMUSG00000025086 | Trub1         | 72133     | turquoise    |
| ENSMUSG00000025089 | Gfra1         | 14585     | blue         |
| ENSMUSG00000031860 | Pbx4          | 80720     | turquoise    |
| ENSMUSG00000031862 | Atp13a1       | 170759    | lightcyan    |
| ENSMUSG00000036019 | Tmtc2         | 278279    | blue         |
| ENSMUSG00000031864 | Ints10        | 70885     | turquoise    |
| ENSMUSG00000081429 | NA            | NA        | tan          |

|                    |               |           |              |
|--------------------|---------------|-----------|--------------|
| ENSMUSG00000031865 | Dctn1         | 13191     | red          |
| ENSMUSG00000021357 | Exoc2         | 66482     | brown        |
| ENSMUSG00000099631 | NA            | NA        | brown        |
| ENSMUSG00000078192 | NA            | NA        | pink         |
| ENSMUSG00000099632 | NA            | NA        | turquoise    |
| ENSMUSG00000078193 | NA            | NA        | black        |
| ENSMUSG00000099634 | NA            | NA        | lightcyan    |
| ENSMUSG00000029050 | Ski           | 20481     | yellow       |
| ENSMUSG00000029053 | Prkcz         | 18762     | turquoise    |
| ENSMUSG00000046295 | Ankle1        | 234396    | magenta      |
| ENSMUSG00000039568 | NA            | NA        | turquoise    |
| ENSMUSG00000067736 | NA            | NA        | yellow       |
| ENSMUSG00000095905 | NA            | NA        | turquoise    |
| ENSMUSG00000029056 | Pank4         | 269614    | turquoise    |
| ENSMUSG00000029059 | Fam213b       | 66469     | brown        |
| ENSMUSG00000057229 | Atp5sl        | 66349     | yellow       |
| ENSMUSG00000025321 | Itgb8         | 320910    | turquoise    |
| ENSMUSG00000070730 | Rmdn3         | 67809     | blue         |
| ENSMUSG00000032050 | Rdx           | 19684     | brown        |
| ENSMUSG00000035835 | Plppr3        | 216152    | cyan         |
| ENSMUSG00000042564 | Fam227a       | 75729     | turquoise    |
| ENSMUSG00000025323 | NA            | NA        | brown        |
| ENSMUSG00000032051 | NA            | NA        | blue         |
| ENSMUSG00000070733 | Fryl          | 72313     | turquoise    |
| ENSMUSG00000025326 | Ube3a         | 22215     | midnightblue |
| ENSMUSG00000042569 | Dhrs7b        | 216820    | turquoise    |
| ENSMUSG00000010660 | Plcd1         | 18799     | turquoise    |
| ENSMUSG00000070738 | Dgkd          | 227333    | green        |
| ENSMUSG00000032058 | Ppp2r1b       | 73699     | green        |
| ENSMUSG00000032059 | Alg9          | 102580    | blue         |
| ENSMUSG00000060227 | Casc4         | 319996    | turquoise    |
| ENSMUSG00000010663 | Fads1         | 76267     | yellow       |
| ENSMUSG00000078435 | AU041133      | 216177    | turquoise    |
| ENSMUSG00000095677 | Dynlt1f       | 100040531 | red          |
| ENSMUSG00000028873 | Cdca8         | 52276     | magenta      |
| ENSMUSG00000104555 | NA            | NA        | turquoise    |
| ENSMUSG00000039801 | 2410089E03Rik | 73692     | turquoise    |
| ENSMUSG00000018362 | Kpna2         | 16647     | magenta      |
| ENSMUSG00000018363 | Smurf2        | 66313     | brown        |
| ENSMUSG00000028876 | Epha10        | 230735    | blue         |
| ENSMUSG00000091941 | NA            | NA        | blue         |
| ENSMUSG00000039804 | Ncoa5         | 228869    | blue         |
| ENSMUSG00000028878 | Fam76a        | 230789    | turquoise    |
| ENSMUSG00000025094 | Slc18a2       | 214084    | brown        |
| ENSMUSG00000028879 | NA            | NA        | blue         |
| ENSMUSG00000081431 | NA            | NA        | black        |
| ENSMUSG00000036023 | Parp2         | 11546     | red          |
| ENSMUSG00000081434 | NA            | NA        | tan          |
| ENSMUSG00000036026 | Tmem63b       | 224807    | turquoise    |
| ENSMUSG00000081436 | NA            | NA        | cyan         |
| ENSMUSG00000100826 | Ipw           | 16353     | turquoise    |
| ENSMUSG00000021361 | Tmem14c       | 66154     | turquoise    |
| ENSMUSG00000014633 | Cmc2          | 66531     | magenta      |
| ENSMUSG00000031875 | Cmtm3         | 68119     | brown        |

|                    |               |        |             |
|--------------------|---------------|--------|-------------|
| ENSMUSG00000021364 | Elov12        | 54326  | turquoise   |
| ENSMUSG00000021365 | Nedd9         | 18003  | turquoise   |
| ENSMUSG00000031878 | Nae1          | 234664 | turquoise   |
| ENSMUSG00000021366 | Hivep1        | 110521 | turquoise   |
| ENSMUSG00000031879 | Fam96b        | 68523  | blue        |
| ENSMUSG00000021368 | Tbc1d7        | 67046  | brown       |
| ENSMUSG00000004127 | Trmt10a       | 108943 | turquoise   |
| ENSMUSG00000108520 | NA            | NA     | pink        |
| ENSMUSG00000099647 | NA            | NA     | turquoise   |
| ENSMUSG00000029060 | Mib2          | 76580  | turquoise   |
| ENSMUSG00000108528 | NA            | NA     | red         |
| ENSMUSG00000029062 | Cdk11b        | 12537  | turquoise   |
| ENSMUSG00000057230 | Aak1          | 269774 | yellow      |
| ENSMUSG00000029063 | Nadk          | 192185 | green       |
| ENSMUSG00000029064 | Gnb1          | 14688  | turquoise   |
| ENSMUSG00000039577 | Nphp4         | 260305 | turquoise   |
| ENSMUSG00000100590 | NA            | NA     | turquoise   |
| ENSMUSG00000029066 | Mrpl20        | 66448  | green       |
| ENSMUSG00000039579 | Grin3a        | 242443 | brown       |
| ENSMUSG00000057234 | Mettl15       | 76894  | pink        |
| ENSMUSG00000007670 | Khsrp         | 16549  | turquoise   |
| ENSMUSG00000074476 | Spc24         | 67629  | magenta     |
| ENSMUSG00000029068 | Ccnl2         | 56036  | turquoise   |
| ENSMUSG00000057236 | Rbbp4         | 19646  | red         |
| ENSMUSG00000035840 | Lysmd3        | 80289  | lightcyan   |
| ENSMUSG00000074479 | NA            | NA     | blue        |
| ENSMUSG00000042570 | Mier2         | 70427  | turquoise   |
| ENSMUSG00000100599 | 1700120C14Rik | 73600  | yellow      |
| ENSMUSG00000042572 | Ube2q1        | 70093  | brown       |
| ENSMUSG00000035845 | Alg12         | 223774 | turquoise   |
| ENSMUSG00000032060 | Cryab         | 12955  | yellow      |
| ENSMUSG00000025332 | Kdm5c         | 20591  | turquoise   |
| ENSMUSG00000035847 | Ids           | 15931  | turquoise   |
| ENSMUSG00000032064 | Dixdc1        | 330938 | turquoise   |
| ENSMUSG00000025337 | Sbds          | 66711  | brown       |
| ENSMUSG00000042579 | NA            | NA     | turquoise   |
| ENSMUSG00000032067 | Pts           | 19286  | blue        |
| ENSMUSG00000003948 | Mmd           | 67468  | yellow      |
| ENSMUSG00000003949 | Hif           | 217082 | greenyellow |
| ENSMUSG00000021606 | Ndufs6        | 407785 | brown       |
| ENSMUSG00000021607 | Mrpl36        | 94066  | blue        |
| ENSMUSG00000000167 | Pih1d2        | 72614  | turquoise   |
| ENSMUSG00000021608 | Lpcat1        | 210992 | brown       |
| ENSMUSG00000000168 | Dlat          | 235339 | turquoise   |
| ENSMUSG00000078440 | Dohh          | 102115 | green       |
| ENSMUSG00000104560 | NA            | NA     | pink        |
| ENSMUSG00000085172 | NA            | NA     | brown       |
| ENSMUSG00000095687 | NA            | NA     | turquoise   |
| ENSMUSG00000028882 | Ppp1r8        | 100336 | red         |
| ENSMUSG00000039810 | NA            | NA     | brown       |
| ENSMUSG00000028884 | Rpa2          | 19891  | salmon      |
| ENSMUSG00000018372 | Cep95         | 320162 | turquoise   |
| ENSMUSG00000028885 | Smpd13b       | 100340 | turquoise   |
| ENSMUSG00000028886 | Eya3          | 14050  | turquoise   |

|                     |               |           |              |
|---------------------|---------------|-----------|--------------|
| ENSMUSG00000091952  | NA            | NA        | red          |
| ENSMUSG00000028889  | Yrdc          | 230734    | blue         |
| ENSMUSG00000063785  | Utp14a        | 72554     | blue         |
| ENSMUSG00000018377  | Vezf1         | 22344     | green        |
| ENSMUSG00000081441  | NA            | NA        | yellow       |
| ENSMUSG00000018378  | 2210416O15Rik | 70393     | turquoise    |
| ENSMUSG00000063787  | Chchd1        | 66121     | midnightblue |
| ENSMUSG00000091955  | NA            | NA        | red          |
| ENSMUSG00000018379  | Srsf1         | 110809    | green        |
| ENSMUSG000000100832 | Gm29260       | 102639765 | blue         |
| ENSMUSG00000091957  | NA            | NA        | red          |
| ENSMUSG00000029309  | Sparcl1       | 13602     | purple       |
| ENSMUSG00000053279  | Aldh1a1       | 11668     | yellow       |
| ENSMUSG00000042810  | Krba1         | 77827     | turquoise    |
| ENSMUSG00000021371  | Mcur1         | 76137     | turquoise    |
| ENSMUSG00000064208  | NA            | NA        | turquoise    |
| ENSMUSG00000031885  | Cbfb          | 12400     | blue         |
| ENSMUSG00000021373  | Cap2          | 67252     | turquoise    |
| ENSMUSG00000032300  | 1700017B05Rik | 74211     | blue         |
| ENSMUSG00000021374  | Nup153        | 218210    | black        |
| ENSMUSG00000032301  | Psma4         | 26441     | green        |
| ENSMUSG00000031887  | Tradd         | 71609     | turquoise    |
| ENSMUSG00000042814  | Mcts2         | 66405     | turquoise    |
| ENSMUSG00000021375  | Kif13a        | 16553     | blue         |
| ENSMUSG00000021376  | NA            | NA        | turquoise    |
| ENSMUSG00000031889  | D230025D16Rik | 234678    | blue         |
| ENSMUSG00000021377  | Dek           | 110052    | black        |
| ENSMUSG00000032305  | Fam219b       | 78323     | green        |
| ENSMUSG00000021379  | Id4           | 15904     | green        |
| ENSMUSG00000032306  | Mpi           | 110119    | blue         |
| ENSMUSG00000032307  | Ube2q2        | 109161    | turquoise    |
| ENSMUSG00000032308  | Ulk3          | 71742     | turquoise    |
| ENSMUSG00000010911  | Apip          | 56369     | blue         |
| ENSMUSG00000032309  | Fbxo22        | 71999     | blue         |
| ENSMUSG00000010914  | Pdhx          | 27402     | brown        |
| ENSMUSG00000084991  | NA            | NA        | turquoise    |
| ENSMUSG00000029070  | Mxra8         | 74761     | brown        |
| ENSMUSG00000029071  | Dvl1          | 13542     | turquoise    |
| ENSMUSG00000039585  | Myo9a         | 270163    | yellow       |
| ENSMUSG00000074482  | NA            | NA        | lightcyan    |
| ENSMUSG00000029073  | Cptp          | 79554     | turquoise    |
| ENSMUSG00000084998  | NA            | NA        | pink         |
| ENSMUSG00000029076  | Sdf4          | 20318     | yellow       |
| ENSMUSG00000057244  | NA            | NA        | salmon       |
| ENSMUSG000000104802 | NA            | NA        | black        |
| ENSMUSG00000007682  | Dio2          | 13371     | turquoise    |
| ENSMUSG00000085415  | Gm12060       | 100134990 | turquoise    |
| ENSMUSG00000035851  | Ythdc1        | 231386    | pink         |
| ENSMUSG000000104806 | NA            | NA        | turquoise    |
| ENSMUSG00000025340  | Rabgef1       | 56715     | turquoise    |
| ENSMUSG00000053510  | Nrd1          | 230598    | blue         |
| ENSMUSG00000060240  | Cend1         | 57754     | yellow       |
| ENSMUSG00000032076  | Cadm1         | 54725     | purple       |
| ENSMUSG00000042589  | Cux2          | 13048     | turquoise    |

|                     |               |        |              |
|---------------------|---------------|--------|--------------|
| ENSMUSG00000060244  | Alyref2       | 56009  | turquoise    |
| ENSMUSG00000032077  | Bud13         | 215051 | blue         |
| ENSMUSG00000043004  | Gng2          | 14702  | red          |
| ENSMUSG00000032078  | Zpr1          | 22687  | red          |
| ENSMUSG00000003955  | Fam162a       | 70186  | midnightblue |
| ENSMUSG000000021610 | Clptm1l       | 218335 | blue         |
| ENSMUSG00000000171  | Sdhd          | 66925  | blue         |
| ENSMUSG000000021613 | Hapln1        | 12950  | purple       |
| ENSMUSG000000021614 | Vcan          | 13003  | grey60       |
| ENSMUSG000000021615 | Xrcc4         | 108138 | blue         |
| ENSMUSG000000095690 | NA            | NA     | brown        |
| ENSMUSG000000078451 | Ppil6         | 73075  | turquoise    |
| ENSMUSG000000078453 | Abracl        | 73112  | salmon       |
| ENSMUSG000000028890 | Mtf1          | 17764  | turquoise    |
| ENSMUSG000000096112 | NA            | NA     | turquoise    |
| ENSMUSG000000028893 | NA            | NA     | turquoise    |
| ENSMUSG000000028894 | Inpp5b        | 16330  | turquoise    |
| ENSMUSG000000028896 | Rcc1          | 100088 | salmon       |
| ENSMUSG000000029310 | Nudt9         | 74167  | turquoise    |
| ENSMUSG000000039824 | Myl6b         | 216459 | grey60       |
| ENSMUSG000000029311 | Hsd17b11      | 114664 | purple       |
| ENSMUSG000000028898 | Trnau1ap      | 71787  | turquoise    |
| ENSMUSG000000029312 | Kihl8         | 246293 | turquoise    |
| ENSMUSG000000028899 | NA            | NA     | blue         |
| ENSMUSG000000029313 | Aff1          | 17355  | turquoise    |
| ENSMUSG000000039826 | Trub2         | 227682 | turquoise    |
| ENSMUSG000000064210 | Ano6          | 105722 | brown        |
| ENSMUSG000000081451 | NA            | NA     | pink         |
| ENSMUSG000000039828 | Wdr70         | 545085 | salmon       |
| ENSMUSG000000046556 | Zfp319        | 79233  | turquoise    |
| ENSMUSG000000081453 | NA            | NA     | black        |
| ENSMUSG000000036045 | NA            | NA     | cyan         |
| ENSMUSG000000053286 | Trmt1l        | 98685  | turquoise    |
| ENSMUSG000000036046 | 5031439G07Rik | 223739 | turquoise    |
| ENSMUSG000000081455 | NA            | NA     | red          |
| ENSMUSG000000064215 | Ifi27         | 52668  | grey60       |
| ENSMUSG000000081456 | NA            | NA     | turquoise    |
| ENSMUSG000000029319 | Coq2          | 71883  | pink         |
| ENSMUSG000000053289 | Ddx10         | 77591  | blue         |
| ENSMUSG000000081459 | NA            | NA     | pink         |
| ENSMUSG000000031897 | Psemb10       | 19171  | turquoise    |
| ENSMUSG000000021385 | Ippk          | 75678  | brown        |
| ENSMUSG000000032312 | Csk           | 12988  | turquoise    |
| ENSMUSG000000042826 | Fgf11         | 14166  | yellow       |
| ENSMUSG000000032314 | Etfa          | 110842 | brown        |
| ENSMUSG000000032316 | Clk3          | 102414 | turquoise    |
| ENSMUSG000000099662 | NA            | NA     | turquoise    |
| ENSMUSG000000000416 | Cttnbp2       | 30785  | yellow       |
| ENSMUSG000000095930 | Nim1k         | 245269 | yellow       |
| ENSMUSG000000029084 | Cd38          | 12494  | yellow       |
| ENSMUSG000000039599 | Fam149b       | 105428 | blue         |
| ENSMUSG000000029086 | Prom1         | 19126  | blue         |
| ENSMUSG000000029089 | Pacrgl        | 66768  | yellow       |
| ENSMUSG000000042590 | Ipo11         | 76582  | green        |

|                    |               |    |        |           |
|--------------------|---------------|----|--------|-----------|
| ENSMUSG00000025350 | Rdh5          |    | 19682  | yellow    |
| ENSMUSG00000035863 | Palm          |    | 18483  | turquoise |
| ENSMUSG00000025351 | Cd63          |    | 12512  | red       |
| ENSMUSG00000025352 | NA            | NA |        | turquoise |
| ENSMUSG00000025353 | Ormdl2        |    | 66844  | yellow    |
| ENSMUSG00000042594 | Sh2b3         |    | 16923  | brown     |
| ENSMUSG00000025354 | Dnajc14       |    | 74330  | blue      |
| ENSMUSG00000042595 | Fam199x       |    | 245622 | pink      |
| ENSMUSG00000035868 | NA            | NA |        | turquoise |
| ENSMUSG00000025357 | Dgka          |    | 13139  | turquoise |
| ENSMUSG00000032086 | Bace1         |    | 23821  | turquoise |
| ENSMUSG00000025358 | Cdk2          |    | 12566  | salmon    |
| ENSMUSG00000042599 | Kdm7a         |    | 338523 | turquoise |
| ENSMUSG00000032087 | Dscaml1       |    | 114873 | turquoise |
| ENSMUSG00000043015 | Tmem194b      |    | 227094 | blue      |
| ENSMUSG00000021621 | Zcchc9        |    | 69085  | blue      |
| ENSMUSG00000043019 | Edem3         |    | 66967  | turquoise |
| ENSMUSG00000000184 | Ccnd2         |    | 12444  | purple    |
| ENSMUSG00000011114 | Tbrg1         |    | 21376  | green     |
| ENSMUSG00000021629 | Slc30a5       |    | 69048  | green     |
| ENSMUSG00000099902 | NA            | NA |        | brown     |
| ENSMUSG00000039830 | Olig2         |    | 50913  | red       |
| ENSMUSG00000039834 | Zfp335        |    | 329559 | turquoise |
| ENSMUSG00000046562 | Unc119b       |    | 106840 | blue      |
| ENSMUSG00000018395 | NA            | NA |        | red       |
| ENSMUSG00000039835 | Nhs1          |    | 215819 | yellow    |
| ENSMUSG00000053291 | Rab4b         |    | 19342  | turquoise |
| ENSMUSG00000074733 | Zfp950        |    | 414758 | turquoise |
| ENSMUSG00000036052 | Dnajb5        |    | 56323  | turquoise |
| ENSMUSG00000053293 | Pom121        |    | 107939 | blue      |
| ENSMUSG00000018398 | 7-Sep         |    | 20362  | green     |
| ENSMUSG00000036053 | Fmnl2         |    | 71409  | turquoise |
| ENSMUSG00000036054 | Sugp2         |    | 234373 | blue      |
| ENSMUSG00000046567 | 4930430F08Rik |    | 68281  | green     |
| ENSMUSG00000029326 | Enoph1        |    | 67870  | blue      |
| ENSMUSG00000029328 | Hnrnpdl       |    | 50926  | blue      |
| ENSMUSG00000036057 | Ptpn23        |    | 104831 | blue      |
| ENSMUSG00000081467 | NA            | NA |        | turquoise |
| ENSMUSG00000021391 | Cenpp         |    | 66336  | magenta   |
| ENSMUSG00000042831 | Alkbh6        |    | 233065 | turquoise |
| ENSMUSG00000004151 | Etv1          |    | 14009  | green     |
| ENSMUSG00000021392 | Nol8          |    | 70930  | blue      |
| ENSMUSG00000032320 | Rcn2          |    | 26611  | yellow    |
| ENSMUSG00000042834 | Nrep          |    | 27528  | turquoise |
| ENSMUSG00000021395 | Spin1         |    | 20729  | blue      |
| ENSMUSG00000014668 | Chfr          |    | 231600 | brown     |
| ENSMUSG00000032324 | Tspan3        |    | 56434  | yellow    |
| ENSMUSG00000032328 | Tmem30a       |    | 69981  | blue      |
| ENSMUSG00000032329 | Hmg20a        |    | 66867  | turquoise |
| ENSMUSG00000000420 | Galnt1        |    | 14423  | turquoise |
| ENSMUSG00000108551 | NA            | NA |        | turquoise |
| ENSMUSG00000010936 | Vac14         |    | 234729 | blue      |
| ENSMUSG00000108555 | NA            | NA |        | turquoise |
| ENSMUSG00000029090 | Adgra3        |    | 70693  | red       |

|                    |               |           |              |
|--------------------|---------------|-----------|--------------|
| ENSMUSG00000029093 | Sorcs2        | 81840     | yellow       |
| ENSMUSG00000057262 | NA            | NA        | blue         |
| ENSMUSG00000029094 | Afap1         | 70292     | turquoise    |
| ENSMUSG00000057265 | Bbof1         | 72873     | turquoise    |
| ENSMUSG00000029097 | NA            | NA        | turquoise    |
| ENSMUSG00000029098 | Acox3         | 80911     | turquoise    |
| ENSMUSG00000085436 | NA            | NA        | turquoise    |
| ENSMUSG00000085438 | 1700020I14Rik | 66602     | brown        |
| ENSMUSG00000025362 | Rps26         | 27370     | black        |
| ENSMUSG00000025364 | Pa2g4         | 18813     | black        |
| ENSMUSG00000035877 | Zhx3          | 320799    | turquoise    |
| ENSMUSG00000081700 | Atp5k-ps2     | 102631836 | turquoise    |
| ENSMUSG00000035878 | Hykk          | 235386    | yellow       |
| ENSMUSG00000060261 | Gtf2i         | 14886     | green        |
| ENSMUSG00000046806 | 3110062M04Rik | 78412     | blue         |
| ENSMUSG00000003970 | Rpl8          | 26961     | black        |
| ENSMUSG00000053536 | Cstf2t        | 83410     | green        |
| ENSMUSG00000032096 | Arcn1         | 213827    | brown        |
| ENSMUSG00000046808 | Atp10d        | 231287    | blue         |
| ENSMUSG00000032097 | Ddx6          | 13209     | turquoise    |
| ENSMUSG00000025369 | Smarcc2       | 68094     | blue         |
| ENSMUSG00000043024 | NA            | NA        | blue         |
| ENSMUSG00000081706 | NA            | NA        | lightcyan    |
| ENSMUSG00000003974 | Grm3          | 108069    | purple       |
| ENSMUSG00000021631 | NA            | NA        | brown        |
| ENSMUSG00000014905 | Dnajb9        | 27362     | turquoise    |
| ENSMUSG00000000194 | NA            | NA        | turquoise    |
| ENSMUSG00000021635 | Rad17         | 19356     | blue         |
| ENSMUSG00000014907 | Naf1          | 234344    | turquoise    |
| ENSMUSG00000021639 | Gtf2h2        | 23894     | green        |
| ENSMUSG00000039840 | Epg5          | 100502841 | turquoise    |
| ENSMUSG00000039841 | Zfp800        | 627049    | green        |
| ENSMUSG00000039842 | Mcph1         | 244329    | blue         |
| ENSMUSG00000039844 | Rapgef1       | 107746    | red          |
| ENSMUSG00000046572 | Zfp518b       | 100515    | blue         |
| ENSMUSG00000046573 | Lym4          | 380840    | midnightblue |
| ENSMUSG00000036061 | NA            | NA        | brown        |
| ENSMUSG00000105015 | NA            | NA        | yellow       |
| ENSMUSG00000029333 | Rasgef1b      | 320292    | lightcyan    |
| ENSMUSG00000046574 | Prr12         | 233210    | turquoise    |
| ENSMUSG00000064231 | NA            | NA        | tan          |
| ENSMUSG00000081473 | NA            | NA        | turquoise    |
| ENSMUSG00000039849 | NA            | NA        | green        |
| ENSMUSG00000100862 | NA            | NA        | yellow       |
| ENSMUSG00000074746 | Pdzd8         | 107368    | turquoise    |
| ENSMUSG00000100863 | Gm12669       | 620016    | red          |
| ENSMUSG00000057506 | Bloc1s2       | 73689     | greenyellow  |
| ENSMUSG00000100865 | NA            | NA        | grey60       |
| ENSMUSG00000074748 | Atxn7l3b      | 382423    | turquoise    |
| ENSMUSG00000081476 | NA            | NA        | turquoise    |
| ENSMUSG00000091989 | Gm17257       | 102634451 | turquoise    |
| ENSMUSG00000074749 | Kiz           | 228730    | blue         |
| ENSMUSG00000007944 | Ttc9b         | 73032     | red          |
| ENSMUSG00000032330 | Cox7a2        | 12866     | midnightblue |



|                    |         |        |              |
|--------------------|---------|--------|--------------|
| ENSMUSG00000025602 | Zfp202  | 80902  | turquoise    |
| ENSMUSG00000092409 | NA      | NA     | grey60       |
| ENSMUSG00000032333 | Stoml1  | 69106  | turquoise    |
| ENSMUSG00000025607 | Copg2   | 54160  | brown        |
| ENSMUSG00000032336 | Nptn    | 20320  | turquoise    |
| ENSMUSG00000025609 | NA      | NA     | blue         |
| ENSMUSG00000108562 | NA      | NA     | turquoise    |
| ENSMUSG00000108563 | NA      | NA     | turquoise    |
| ENSMUSG00000099689 | Zfp383  | 73729  | turquoise    |
| ENSMUSG00000089177 | NA      | NA     | lightcyan    |
| ENSMUSG00000000439 | NA      | NA     | blue         |
| ENSMUSG00000068200 | NA      | NA     | red          |
| ENSMUSG00000078713 | Tomm5   | 68512  | green        |
| ENSMUSG00000067786 | Nnat    | 18111  | brown        |
| ENSMUSG00000085442 | NA      | NA     | turquoise    |
| ENSMUSG00000067787 | Blcap   | 53619  | blue         |
| ENSMUSG00000078716 | Tmem8b  | 242409 | turquoise    |
| ENSMUSG00000068205 | MacroD2 | 72899  | brown        |
| ENSMUSG00000057278 | NA      | NA     | black        |
| ENSMUSG00000068206 | Pick1   | 18693  | turquoise    |
| ENSMUSG00000025371 | Chmp6   | 208092 | red          |
| ENSMUSG00000035885 | Cox8a   | 12868  | greenyellow  |
| ENSMUSG00000025373 | Rnf41   | 67588  | blue         |
| ENSMUSG00000025374 | Nabp2   | 69917  | green        |
| ENSMUSG00000025375 | Aatk    | 11302  | yellow       |
| ENSMUSG00000081712 | NA      | NA     | yellow       |
| ENSMUSG00000101059 | NA      | NA     | turquoise    |
| ENSMUSG00000025377 | Enthd2  | 78777  | turquoise    |
| ENSMUSG00000036305 | NA      | NA     | black        |
| ENSMUSG00000046818 | Ddit4l  | 73284  | turquoise    |
| ENSMUSG00000071202 | Ccdc78  | 381077 | brown        |
| ENSMUSG00000036306 | Lzts1   | 211134 | red          |
| ENSMUSG00000081715 | NA      | NA     | blue         |
| ENSMUSG00000036309 | Skp1a   | 21402  | midnightblue |
| ENSMUSG00000060279 | Ap2a1   | 11771  | blue         |
| ENSMUSG00000071207 | NA      | NA     | blue         |
| ENSMUSG00000021643 | Serf1   | 20365  | blue         |
| ENSMUSG00000021645 | Smn1    | 20595  | green        |
| ENSMUSG00000021646 | Mccc2   | 78038  | pink         |
| ENSMUSG00000078480 | NA      | NA     | turquoise    |
| ENSMUSG00000078484 | Klhl17  | 231003 | turquoise    |
| ENSMUSG00000039850 | Endov   | 338371 | turquoise    |
| ENSMUSG00000046580 | NA      | NA     | red          |
| ENSMUSG00000096145 | Vkorc1  | 27973  | turquoise    |
| ENSMUSG00000039852 | Rere    | 68703  | brown        |
| ENSMUSG00000029344 | Tpst2   | 22022  | blue         |
| ENSMUSG00000029345 | Tfip11  | 54723  | brown        |
| ENSMUSG00000074754 | Gm561   | 228715 | brown        |
| ENSMUSG00000007950 | Abhd8   | 64296  | brown        |
| ENSMUSG00000092412 | NA      | NA     | turquoise    |
| ENSMUSG00000047003 | Zfp41   | 22701  | blue         |
| ENSMUSG00000081485 | NA      | NA     | turquoise    |
| ENSMUSG00000029348 | Asphd2  | 72898  | turquoise    |
| ENSMUSG00000036078 | Sigmar1 | 18391  | brown        |

|                    |               |           |             |
|--------------------|---------------|-----------|-------------|
| ENSMUSG00000100876 | 2810454H06Rik | 72813     | yellow      |
| ENSMUSG00000042851 | Zc3h6         | 78751     | brown       |
| ENSMUSG00000092416 | Zfp141        | 434178    | brown       |
| ENSMUSG00000092417 | Gpank1        | 81845     | lightcyan   |
| ENSMUSG00000032340 | Neo1          | 18007     | brown       |
| ENSMUSG00000025613 | Cct8          | 12469     | blue        |
| ENSMUSG00000042854 | Trp53rkb      | 76367     | brown       |
| ENSMUSG00000032342 | Mto1          | 68291     | blue        |
| ENSMUSG00000060510 | Zfp266        | 77519     | red         |
| ENSMUSG00000025616 | Usp16         | 74112     | turquoise   |
| ENSMUSG00000050002 | Idnk          | 75731     | turquoise   |
| ENSMUSG00000032348 | Gsta4         | 14860     | greenyellow |
| ENSMUSG00000032349 | Elovl5        | 68801     | purple      |
| ENSMUSG00000000441 | Raf1          | 110157    | green       |
| ENSMUSG00000060519 | Tor3a         | 30935     | yellow      |
| ENSMUSG00000108573 | NA            | NA        | pink        |
| ENSMUSG00000104842 | NA            | NA        | turquoise   |
| ENSMUSG00000092182 | NA            | NA        | turquoise   |
| ENSMUSG00000104843 | NA            | NA        | pink        |
| ENSMUSG00000035890 | Rnf126        | 70294     | blue        |
| ENSMUSG00000035891 | Cerk          | 223753    | blue        |
| ENSMUSG00000018651 | Tada2a        | 217031    | blue        |
| ENSMUSG00000025381 | Cnpy2         | 56530     | yellow      |
| ENSMUSG00000008140 | Emc10         | 69683     | brown       |
| ENSMUSG00000046822 | Slc39a3       | 106947    | turquoise   |
| ENSMUSG00000025384 | Faap100       | 71885     | blue        |
| ENSMUSG00000053552 | Ebf4          | 228598    | turquoise   |
| ENSMUSG00000035898 | NA            | NA        | turquoise   |
| ENSMUSG00000081721 | NA            | NA        | greenyellow |
| ENSMUSG00000036315 | Znrd1         | 66136     | red         |
| ENSMUSG00000003992 | Ssbp2         | 66970     | yellow      |
| ENSMUSG00000021650 | Ptcd2         | 68927     | green       |
| ENSMUSG00000060288 | Ppih          | 66101     | brown       |
| ENSMUSG00000081729 | NA            | NA        | blue        |
| ENSMUSG00000078490 | Cfap74        | 544678    | yellow      |
| ENSMUSG00000078495 | Gm13157       | 100041677 | turquoise   |
| ENSMUSG00000108813 | NA            | NA        | turquoise   |
| ENSMUSG00000105031 | NA            | NA        | tan         |
| ENSMUSG00000096156 | NA            | NA        | brown       |
| ENSMUSG00000046591 | Ticrr         | 77011     | magenta     |
| ENSMUSG00000096157 | NA            | NA        | pink        |
| ENSMUSG00000057522 | Spop          | 20747     | green       |
| ENSMUSG00000081491 | NA            | NA        | tan         |
| ENSMUSG00000046598 | Bdh1          | 71911     | turquoise   |
| ENSMUSG00000081494 | NA            | NA        | turquoise   |
| ENSMUSG00000036086 | Zranb3        | 226409    | salmon      |
| ENSMUSG00000064254 | Ethe1         | 66071     | brown       |
| ENSMUSG00000036087 | Slain2        | 75991     | turquoise   |
| ENSMUSG00000032350 | Gclc          | 14629     | brown       |
| ENSMUSG00000032353 | Tmed3         | 66111     | turquoise   |
| ENSMUSG00000015112 | Slc25a13      | 50799     | turquoise   |
| ENSMUSG00000025626 | Phf6          | 70998     | red         |
| ENSMUSG00000004187 | Kifc2         | 16581     | turquoise   |
| ENSMUSG00000050017 | Pitpnb        | 56305     | blue        |

|                    |          |        |             |
|--------------------|----------|--------|-------------|
| ENSMUSG00000095972 | NA       | NA     | brown       |
| ENSMUSG00000068220 | Lgals1   | 16852  | turquoise   |
| ENSMUSG00000092193 | NA       | NA     | turquoise   |
| ENSMUSG00000018661 | Cog1     | 16834  | green       |
| ENSMUSG00000053560 | Ier2     | 15936  | red         |
| ENSMUSG00000025393 | Atp5b    | 11947  | brown       |
| ENSMUSG00000018666 | Cbx1     | 12412  | red         |
| ENSMUSG00000025395 | Prim1    | 19075  | salmon      |
| ENSMUSG00000081731 | NA       | NA     | lightcyan   |
| ENSMUSG00000036323 | Srp72    | 66661  | blue        |
| ENSMUSG00000046836 | Brox     | 71678  | turquoise   |
| ENSMUSG00000018669 | Cdk5rap3 | 80280  | brown       |
| ENSMUSG00000053565 | Eif3k    | 73830  | green       |
| ENSMUSG00000036327 | Qsox2    | 227638 | blue        |
| ENSMUSG00000021660 | Btf3     | 218490 | blue        |
| ENSMUSG00000014932 | Yes1     | 22612  | brown       |
| ENSMUSG00000081738 | NA       | NA     | red         |
| ENSMUSG00000021661 | Ankra2   | 68558  | blue        |
| ENSMUSG00000071226 | Cecr2    | 330409 | blue        |
| ENSMUSG00000081739 | NA       | NA     | turquoise   |
| ENSMUSG00000043059 | Zfp513   | 101023 | yellow      |
| ENSMUSG00000021665 | Hexb     | 15212  | green       |
| ENSMUSG00000021666 | Gfm2     | 320806 | blue        |
| ENSMUSG00000021668 | Polk     | 27015  | brown       |
| ENSMUSG00000021669 | Col4a3bp | 68018  | turquoise   |
| ENSMUSG00000011158 | Brf1     | 72308  | green       |
| ENSMUSG00000096160 | NA       | NA     | turquoise   |
| ENSMUSG00000039873 | Neur12   | 415115 | turquoise   |
| ENSMUSG00000057530 | Ece1     | 230857 | purple      |
| ENSMUSG00000057531 | Dtnbp1   | 94245  | turquoise   |
| ENSMUSG00000029363 | NA       | NA     | salmon      |
| ENSMUSG00000029364 | Wsb2     | 59043  | pink        |
| ENSMUSG00000036093 | Arl5a    | 75423  | blue        |
| ENSMUSG00000039879 | Heca     | 380629 | blue        |
| ENSMUSG00000029366 | Dck      | 13178  | salmon      |
| ENSMUSG00000047022 | Mipol1   | 73490  | turquoise   |
| ENSMUSG00000036095 | Dgkb     | 217480 | yellow      |
| ENSMUSG00000064264 | Zfp428   | 232969 | turquoise   |
| ENSMUSG00000036097 | Fam178a  | 226151 | blue        |
| ENSMUSG00000018900 | Slc22a5  | 20520  | turquoise   |
| ENSMUSG00000042870 | Tom1     | 21968  | greenyellow |
| ENSMUSG00000036099 | Vezt     | 215008 | turquoise   |
| ENSMUSG00000025630 | Hprt     | 15452  | black       |
| ENSMUSG00000092438 | NA       | NA     | cyan        |
| ENSMUSG00000042873 | Lhfp14   | 269788 | turquoise   |
| ENSMUSG00000015120 | NA       | NA     | black       |
| ENSMUSG00000053801 | Grwd1    | 101612 | blue        |
| ENSMUSG00000101316 | NA       | NA     | lightcyan   |
| ENSMUSG00000018909 | Arrb1    | 109689 | turquoise   |
| ENSMUSG00000060534 | NA       | NA     | yellow      |
| ENSMUSG00000032366 | Tpm1     | 22003  | blue        |
| ENSMUSG00000015126 | Tsr3     | 68327  | green       |
| ENSMUSG00000032369 | Plscr1   | 22038  | turquoise   |
| ENSMUSG00000021900 | Btd      | 26363  | blue        |

|                    |           |        |              |
|--------------------|-----------|--------|--------------|
| ENSMUSG00000060538 | Tmem219   | 68742  | turquoise    |
| ENSMUSG00000021901 | Bap1      | 104416 | green        |
| ENSMUSG00000108591 | NA        | NA     | brown        |
| ENSMUSG00000050029 | Rap2c     | 72065  | turquoise    |
| ENSMUSG00000021905 | Dph3      | 105638 | blue         |
| ENSMUSG00000021906 | Oxnad1    | 218885 | blue         |
| ENSMUSG00000021908 | NA        | NA     | turquoise    |
| ENSMUSG00000104862 | NA        | NA     | pink         |
| ENSMUSG00000096401 | NA        | NA     | turquoise    |
| ENSMUSG00000104864 | NA        | NA     | blue         |
| ENSMUSG00000096403 | NA        | NA     | black        |
| ENSMUSG00000046841 | Ckap4     | 216197 | blue         |
| ENSMUSG00000029600 | Rita1     | 100764 | brown        |
| ENSMUSG00000029601 | Iqcd      | 75732  | yellow       |
| ENSMUSG00000081740 | NA        | NA     | black        |
| ENSMUSG00000029603 | Dtx1      | 14357  | turquoise    |
| ENSMUSG00000018677 | Slc25a39  | 68066  | blue         |
| ENSMUSG00000043061 | Tmem18    | 211986 | turquoise    |
| ENSMUSG00000036333 | Kidins220 | 77480  | purple       |
| ENSMUSG00000018678 | Sp2       | 78912  | turquoise    |
| ENSMUSG00000008167 | Fbxw9     | 68628  | turquoise    |
| ENSMUSG00000081745 | NA        | NA     | pink         |
| ENSMUSG00000043065 | Spice1    | 212514 | blue         |
| ENSMUSG00000021670 | Hmgcr     | 15357  | turquoise    |
| ENSMUSG00000043067 | Dpy1911   | 244745 | red          |
| ENSMUSG00000036339 | Tmem260   | 218989 | turquoise    |
| ENSMUSG00000021671 | Poc5      | 67463  | turquoise    |
| ENSMUSG00000032601 | Prkar2a   | 19087  | turquoise    |
| ENSMUSG00000032602 | Slc25a20  | 57279  | turquoise    |
| ENSMUSG00000032604 | Qars      | 97541  | blue         |
| ENSMUSG00000032606 | Nicn1     | 66257  | midnightblue |
| ENSMUSG00000032607 | NA        | NA     | turquoise    |
| ENSMUSG00000032609 | Klhdc8b   | 78267  | turquoise    |
| ENSMUSG00000096171 | NA        | NA     | yellow       |
| ENSMUSG00000096173 | NA        | NA     | yellow       |
| ENSMUSG00000000708 | Kat2b     | 18519  | turquoise    |
| ENSMUSG00000074780 | NA        | NA     | pink         |
| ENSMUSG00000074781 | Ube2n     | 93765  | midnightblue |
| ENSMUSG00000039886 | Tmem120a  | 215210 | turquoise    |
| ENSMUSG00000057541 | Pus7      | 78697  | turquoise    |
| ENSMUSG00000039887 | Alg14     | 66789  | blue         |
| ENSMUSG00000085711 | NA        | NA     | turquoise    |
| ENSMUSG00000047030 | Spata2    | 263876 | green        |
| ENSMUSG00000105058 | NA        | NA     | yellow       |
| ENSMUSG00000029376 | Mthfd2l   | 665563 | turquoise    |
| ENSMUSG00000047036 | NA        | NA     | green        |
| ENSMUSG00000047037 | NA        | NA     | turquoise    |
| ENSMUSG00000032370 | Lactb     | 80907  | turquoise    |
| ENSMUSG00000007987 | NA        | NA     | green        |
| ENSMUSG00000007989 | NA        | NA     | yellow       |
| ENSMUSG00000025645 | NA        | NA     | turquoise    |
| ENSMUSG00000032374 | Plod2     | 26432  | turquoise    |
| ENSMUSG00000025647 | Shisa5    | 66940  | yellow       |
| ENSMUSG00000032375 | Aph1b     | 208117 | turquoise    |

|                    |          |    |        |             |
|--------------------|----------|----|--------|-------------|
| ENSMUSG00000025648 | Pfkfb4   |    | 270198 | turquoise   |
| ENSMUSG00000032376 | Usp3     |    | 235441 | red         |
| ENSMUSG00000032377 | Plscr4   |    | 235527 | blue        |
| ENSMUSG00000053819 | Camk2d   |    | 108058 | pink        |
| ENSMUSG00000060548 | Tnfrsf19 |    | 29820  | yellow      |
| ENSMUSG00000021910 | Nisch    |    | 64652  | turquoise   |
| ENSMUSG00000021911 | Parg     |    | 26430  | turquoise   |
| ENSMUSG00000021913 | Ogdhl    |    | 239017 | yellow      |
| ENSMUSG00000021916 | Glt8d1   |    | 76485  | turquoise   |
| ENSMUSG00000021917 | Spcs1    |    | 69019  | brown       |
| ENSMUSG00000095990 | Zfp97    |    | 22759  | turquoise   |
| ENSMUSG00000021918 | Nek4     |    | 23955  | blue        |
| ENSMUSG00000068240 | NA       | NA |        | black       |
| ENSMUSG00000068243 | NA       | NA |        | tan         |
| ENSMUSG00000085487 | NA       | NA |        | yellow      |
| ENSMUSG00000029610 | Aimp2    |    | 231872 | green       |
| ENSMUSG00000053580 | Tanc2    |    | 77097  | turquoise   |
| ENSMUSG00000053581 | Zfand2a  |    | 100494 | turquoise   |
| ENSMUSG00000081750 | NA       | NA |        | tan         |
| ENSMUSG00000029613 | NA       | NA |        | blue        |
| ENSMUSG00000081751 | NA       | NA |        | tan         |
| ENSMUSG00000029614 | Rpl6     |    | 19988  | black       |
| ENSMUSG00000081752 | NA       | NA |        | red         |
| ENSMUSG00000029616 | NA       | NA |        | brown       |
| ENSMUSG00000029617 | Ccz1     |    | 231874 | green       |
| ENSMUSG00000081758 | NA       | NA |        | greenyellow |
| ENSMUSG00000021681 | Aggf1    |    | 66549  | brown       |
| ENSMUSG00000054008 | Ndst1    |    | 15531  | brown       |
| ENSMUSG00000021684 | Pde8b    |    | 218461 | turquoise   |
| ENSMUSG00000014956 | NA       | NA |        | black       |
| ENSMUSG00000032612 | Usp4     |    | 22258  | purple      |
| ENSMUSG00000021686 | Ap3b1    |    | 11774  | turquoise   |
| ENSMUSG00000022100 | Xpo7     |    | 65246  | brown       |
| ENSMUSG00000021687 | Scamp1   |    | 107767 | turquoise   |
| ENSMUSG00000014959 | Gorasp2  |    | 70231  | blue        |
| ENSMUSG00000032615 | Nt5m     |    | 103850 | turquoise   |
| ENSMUSG00000022105 | Rb1      |    | 19645  | blue        |
| ENSMUSG00000011179 | Odc1     |    | 18263  | red         |
| ENSMUSG00000022106 | Rcbtb2   |    | 105670 | brown       |
| ENSMUSG00000022108 | Itm2b    |    | 16432  | red         |
| ENSMUSG00000000711 | Rab5b    |    | 19344  | turquoise   |
| ENSMUSG00000022109 | Med4     |    | 67381  | blue        |
| ENSMUSG00000096188 | Cmtm4    |    | 97487  | blue        |
| ENSMUSG00000057551 | NA       | NA |        | turquoise   |
| ENSMUSG00000064280 | Ccdc146  |    | 75172  | turquoise   |
| ENSMUSG00000074794 | Arrdc3   |    | 105171 | green       |
| ENSMUSG00000029385 | Ccng2    |    | 12452  | green       |
| ENSMUSG00000064281 | NA       | NA |        | tan         |
| ENSMUSG00000057554 | Lgals8   |    | 56048  | blue        |
| ENSMUSG00000029386 | NA       | NA |        | yellow      |
| ENSMUSG00000029387 | Gtf2h3   |    | 209357 | red         |
| ENSMUSG00000064284 | Cdpf1    |    | 72355  | turquoise   |
| ENSMUSG00000029388 | Eif2b1   |    | 209354 | brown       |
| ENSMUSG00000074797 | Itpa     |    | 16434  | red         |

|                    |               |           |           |
|--------------------|---------------|-----------|-----------|
| ENSMUSG00000047044 | D030056L22Ril | 225995    | red       |
| ENSMUSG00000029389 | Ddx55         | 67848     | turquoise |
| ENSMUSG00000092454 | NA            | NA        | black     |
| ENSMUSG00000101330 | NA            | NA        | pink      |
| ENSMUSG00000047045 | Tmem164       | 209497    | turquoise |
| ENSMUSG00000018921 | Pelp1         | 75273     | black     |
| ENSMUSG00000064288 | NA            | NA        | turquoise |
| ENSMUSG00000018923 | Med11         | 66172     | blue      |
| ENSMUSG00000025651 | Uqcrc1        | 22273     | yellow    |
| ENSMUSG00000064289 | Tank          | 21353     | turquoise |
| ENSMUSG00000092458 | NA            | NA        | pink      |
| ENSMUSG00000032381 | Fam96a        | 68250     | green     |
| ENSMUSG00000032382 | Snx1          | 56440     | green     |
| ENSMUSG00000032383 | Ppib          | 19035     | green     |
| ENSMUSG00000101337 | Dnah7c        | 100101919 | turquoise |
| ENSMUSG00000043311 | D17H6S53E     | 114585    | turquoise |
| ENSMUSG00000032384 | Csnk1g1       | 214897    | turquoise |
| ENSMUSG00000025656 | Arhgef9       | 236915    | turquoise |
| ENSMUSG00000032386 | Trip4         | 56404     | turquoise |
| ENSMUSG00000032387 | Rbpms2        | 71973     | turquoise |
| ENSMUSG00000032388 | Spg21         | 27965     | brown     |
| ENSMUSG00000050043 | Tmx2          | 66958     | yellow    |
| ENSMUSG00000015149 | Sirt2         | 64383     | turquoise |
| ENSMUSG00000060559 | NA            | NA        | yellow    |
| ENSMUSG00000000486 | 31-Aug        | 54204     | yellow    |
| ENSMUSG00000021927 | NA            | NA        | lightcyan |
| ENSMUSG00000021928 | Ebpl          | 68177     | turquoise |
| ENSMUSG00000021929 | Kpna3         | 16648     | green     |
| ENSMUSG00000078762 | Haus5         | 71909     | salmon    |
| ENSMUSG00000068250 | Amn1          | 232566    | yellow    |
| ENSMUSG00000085492 | Trmt61b       | 68789     | turquoise |
| ENSMUSG00000078765 | U2af114       | 233073    | blue      |
| ENSMUSG00000104882 | NA            | NA        | turquoise |
| ENSMUSG00000078768 | Zfp566        | 72556     | pink      |
| ENSMUSG00000085499 | Gm15713       | 626693    | turquoise |
| ENSMUSG00000046861 | Hectd3        | 76608     | green     |
| ENSMUSG00000029621 | Arpc1a        | 56443     | blue      |
| ENSMUSG00000046862 | Pramef8       | 242736    | blue      |
| ENSMUSG00000105304 | NA            | NA        | brown     |
| ENSMUSG00000029622 | Arpc1b        | 11867     | turquoise |
| ENSMUSG00000029623 | Pdap1         | 231887    | red       |
| ENSMUSG00000018697 | Aatf          | 56321     | blue      |
| ENSMUSG00000029624 | Ptcd1         | 71799     | blue      |
| ENSMUSG00000036352 | Ubac1         | 98766     | turquoise |
| ENSMUSG00000046865 | Fbl           | 14113     | red       |
| ENSMUSG00000029625 | Cpsf4         | 54188     | red       |
| ENSMUSG00000036353 | P2ry12        | 70839     | turquoise |
| ENSMUSG00000029627 | Zkscan14      | 67235     | brown     |
| ENSMUSG00000036356 | Csgalnact1    | 234356    | yellow    |
| ENSMUSG00000071253 | Slc25a16      | 73132     | blue      |
| ENSMUSG00000029629 | Phf14         | 75725     | turquoise |
| ENSMUSG00000021690 | Jmy           | 57748     | turquoise |
| ENSMUSG00000021692 | Dimt1         | 66254     | black     |
| ENSMUSG00000004451 | Ralb          | 64143     | brown     |

|                    |               |        |             |
|--------------------|---------------|--------|-------------|
| ENSMUSG00000021693 | Kif2a         | 16563  | turquoise   |
| ENSMUSG00000032621 | Srek1         | 218543 | green       |
| ENSMUSG00000022110 | Sucla2        | 20916  | turquoise   |
| ENSMUSG00000004455 | Ppp1cc        | 19047  | green       |
| ENSMUSG00000032624 | Eml4          | 78798  | red         |
| ENSMUSG00000021697 | Depdc1b       | 218581 | magenta     |
| ENSMUSG00000022111 | Uchl3         | 50933  | brown       |
| ENSMUSG00000022112 | Gpc5          | 103978 | purple      |
| ENSMUSG00000032625 | Thsd7a        | 330267 | brown       |
| ENSMUSG00000021699 | NA            | NA     | turquoise   |
| ENSMUSG00000022114 | Spry2         | 24064  | yellow      |
| ENSMUSG00000022119 | Rbm26         | 74213  | turquoise   |
| ENSMUSG00000029390 | Tmed2         | 56334  | brown       |
| ENSMUSG00000029392 | Rilpl1        | 75695  | yellow      |
| ENSMUSG00000057561 | Eif1a         | 13664  | blue        |
| ENSMUSG00000096199 | Ptrhd1        | 69709  | red         |
| ENSMUSG00000029394 | Cdk2ap1       | 13445  | green       |
| ENSMUSG00000029397 | Rchy1         | 68098  | blue        |
| ENSMUSG00000085735 | NA            | NA     | greenyellow |
| ENSMUSG00000018931 | Natd1         | 24083  | turquoise   |
| ENSMUSG00000085738 | NA            | NA     | salmon      |
| ENSMUSG00000018932 | Map2k3        | 26397  | blue        |
| ENSMUSG00000075227 | Znhit2        | 29805  | turquoise   |
| ENSMUSG00000053830 | NA            | NA     | brown       |
| ENSMUSG00000075229 | Ccdc58        | 381045 | green       |
| ENSMUSG00000032393 | Dpp8          | 74388  | turquoise   |
| ENSMUSG00000032394 | Igdcc3        | 19289  | grey60      |
| ENSMUSG00000025666 | Tmem47        | 192216 | purple      |
| ENSMUSG00000053835 | H2-T24        | 15042  | turquoise   |
| ENSMUSG00000032396 | Dis3l         | 213550 | turquoise   |
| ENSMUSG00000043323 | Fbrsl1        | 381668 | yellow      |
| ENSMUSG00000032397 | Tipin         | 66131  | salmon      |
| ENSMUSG00000053838 | Nudcd3        | 209586 | blue        |
| ENSMUSG00000032398 | Snpc5         | 330959 | turquoise   |
| ENSMUSG00000008429 | Herpud2       | 80517  | blue        |
| ENSMUSG00000032399 | Rpl4          | 67891  | black       |
| ENSMUSG00000021930 | Spryd7        | 66674  | purple      |
| ENSMUSG00000021932 | Rnaseh2b      | 67153  | purple      |
| ENSMUSG00000021936 | Mapk8         | 26419  | turquoise   |
| ENSMUSG00000021938 | Pspc1         | 66645  | brown       |
| ENSMUSG00000021939 | Ctsb          | 13030  | purple      |
| ENSMUSG00000011427 | Zfp790        | 233056 | turquoise   |
| ENSMUSG00000078773 | Rad54b        | 623474 | magenta     |
| ENSMUSG00000068262 | Gm5879        | 545864 | tan         |
| ENSMUSG00000089704 | Galnt2        | 108148 | turquoise   |
| ENSMUSG00000068264 | Ap5s1         | 69596  | yellow      |
| ENSMUSG00000096433 | Gm4944        | 240038 | turquoise   |
| ENSMUSG00000089706 | B230216N24Ril | 78603  | cyan        |
| ENSMUSG00000029632 | Ndufa4        | 17992  | turquoise   |
| ENSMUSG00000046873 | Mbtps2        | 270669 | blue        |
| ENSMUSG00000029633 | NA            | NA     | turquoise   |
| ENSMUSG00000043090 | NA            | NA     | turquoise   |
| ENSMUSG00000029634 | Rnf6          | 74132  | green       |
| ENSMUSG00000043091 | Tuba1c        | 22146  | magenta     |

|                    |               |        |              |
|--------------------|---------------|--------|--------------|
| ENSMUSG00000046876 | Atxn1         | 20238  | turquoise    |
| ENSMUSG00000029635 | Cdk8          | 264064 | turquoise    |
| ENSMUSG00000081773 | NA            | NA     | grey60       |
| ENSMUSG00000029636 | NA            | NA     | turquoise    |
| ENSMUSG00000019124 | NA            | NA     | turquoise    |
| ENSMUSG00000092702 | NA            | NA     | turquoise    |
| ENSMUSG00000054021 | Sirt5         | 68346  | turquoise    |
| ENSMUSG00000046879 | Irgm1         | 15944  | turquoise    |
| ENSMUSG00000029638 | Glcci1        | 170772 | turquoise    |
| ENSMUSG00000071266 | Zfp946        | 74149  | green        |
| ENSMUSG00000004460 | Dnajb11       | 67838  | brown        |
| ENSMUSG00000071267 | Zfp942        | 73233  | blue         |
| ENSMUSG00000004462 | Tbccd1        | 70573  | yellow       |
| ENSMUSG00000025903 | Lypla1        | 18777  | blue         |
| ENSMUSG00000032633 | Ficn          | 216805 | turquoise    |
| ENSMUSG00000022120 | Rnf219        | 72486  | green        |
| ENSMUSG00000060802 | B2m           | 12010  | yellow       |
| ENSMUSG00000060803 | Gstp1         | 14870  | midnightblue |
| ENSMUSG00000022122 | Ednrb         | 13618  | blue         |
| ENSMUSG00000025907 | Rb1cc1        | 12421  | turquoise    |
| ENSMUSG00000099980 | NA            | NA     | yellow       |
| ENSMUSG00000022124 | Fbxl3         | 50789  | turquoise    |
| ENSMUSG00000032637 | Atxn2l        | 233871 | blue         |
| ENSMUSG00000022125 | Cln5          | 211286 | brown        |
| ENSMUSG00000000732 | Icosl         | 50723  | yellow       |
| ENSMUSG00000105081 | NA            | NA     | turquoise    |
| ENSMUSG00000000738 | Spg7          | 234847 | turquoise    |
| ENSMUSG00000057572 | NA            | NA     | blue         |
| ENSMUSG00000085741 | 5430405H02Rik | 74487  | yellow       |
| ENSMUSG00000075232 | Amd1          | 11702  | turquoise    |
| ENSMUSG00000047067 | Dusp28        | 67446  | turquoise    |
| ENSMUSG00000053841 | Txlna         | 109658 | blue         |
| ENSMUSG00000008435 | Rdh13         | 108841 | blue         |
| ENSMUSG00000060572 | Mfap2         | 17150  | blue         |
| ENSMUSG00000015165 | Hnrnp1        | 15388  | red          |
| ENSMUSG00000036606 | Plxnb2        | 140570 | blue         |
| ENSMUSG00000050064 | Zfp697        | 242109 | brown        |
| ENSMUSG00000021945 | Zmym2         | 76007  | yellow       |
| ENSMUSG00000078784 | 1810022K09Rik | 69126  | yellow       |
| ENSMUSG00000078786 | BC024978      | 414069 | turquoise    |
| ENSMUSG00000089715 | Cbx6          | 494448 | turquoise    |
| ENSMUSG00000078789 | Dph1          | 116905 | turquoise    |
| ENSMUSG00000096448 | NA            | NA     | pink         |
| ENSMUSG00000029642 | Polr1d        | 20018  | blue         |
| ENSMUSG00000096449 | NA            | NA     | turquoise    |
| ENSMUSG00000036371 | NA            | NA     | blue         |
| ENSMUSG00000036372 | Tmem258       | 69038  | midnightblue |
| ENSMUSG00000081781 | NA            | NA     | turquoise    |
| ENSMUSG00000019132 | NA            | NA     | yellow       |
| ENSMUSG00000029647 | Pan3          | 72587  | brown        |
| ENSMUSG00000036376 | NA            | NA     | blue         |
| ENSMUSG00000071273 | NA            | NA     | blue         |
| ENSMUSG00000014980 | Tsen15        | 66637  | green        |
| ENSMUSG00000029649 | NA            | NA     | green        |



|                    |               |           |           |
|--------------------|---------------|-----------|-----------|
| ENSMUSG00000036377 | C530008M17Ri  | 320827    | turquoise |
| ENSMUSG00000081787 | NA            | NA        | turquoise |
| ENSMUSG00000081788 | NA            | NA        | blue      |
| ENSMUSG00000019139 | Isyna1        | 71780     | turquoise |
| ENSMUSG00000081789 | NA            | NA        | turquoise |
| ENSMUSG00000025911 | Adhfe1        | 76187     | red       |
| ENSMUSG00000025912 | Mybl1         | 17864     | salmon    |
| ENSMUSG00000032640 | Chsy1         | 269941    | turquoise |
| ENSMUSG00000032641 | Gpr19         | 14760     | turquoise |
| ENSMUSG00000022130 | Tgds          | 76355     | brown     |
| ENSMUSG00000025915 | NA            | NA        | turquoise |
| ENSMUSG00000022131 | Gpr180        | 58245     | turquoise |
| ENSMUSG00000022132 | Cldn10        | 58187     | purple    |
| ENSMUSG00000025917 | Cops5         | 26754     | green     |
| ENSMUSG00000032648 | Pygm          | 19309     | yellow    |
| ENSMUSG00000022136 | Dnajc3        | 100037258 | turquoise |
| ENSMUSG00000032649 | Colgalt2      | 269132    | brown     |
| ENSMUSG00000000740 | Rpl13         | 270106    | black     |
| ENSMUSG00000022139 | Mbnl2         | 105559    | turquoise |
| ENSMUSG00000000743 | Chmp1a        | 234852    | turquoise |
| ENSMUSG00000099997 | NA            | NA        | blue      |
| ENSMUSG00000099998 | NA            | NA        | blue      |
| ENSMUSG00000057580 | NA            | NA        | yellow    |
| ENSMUSG00000075245 | NA            | NA        | tan       |
| ENSMUSG00000092486 | 2610524H06Rik | 330173    | blue      |
| ENSMUSG00000058006 | Mdn1          | 100019    | turquoise |
| ENSMUSG00000036611 | Eepd1         | 67484     | turquoise |
| ENSMUSG00000036613 | Tssc1         | 380752    | green     |
| ENSMUSG00000026102 | Inpp1         | 16329     | turquoise |
| ENSMUSG00000036615 | Rfxap         | 170767    | brown     |
| ENSMUSG00000015176 | Nolc1         | 70769     | red       |
| ENSMUSG00000026103 | Gls           | 14660     | turquoise |
| ENSMUSG00000026104 | Stat1         | 20846     | turquoise |
| ENSMUSG00000043346 | NA            | NA        | turquoise |
| ENSMUSG00000021951 | N6amt2        | 68043     | blue      |
| ENSMUSG00000021952 | Xpo4          | 57258     | blue      |
| ENSMUSG00000050079 | Rspry1        | 67610     | blue      |
| ENSMUSG00000021957 | Tkt           | 21881     | brown     |
| ENSMUSG00000021958 | Pinx1         | 72400     | turquoise |
| ENSMUSG00000021959 | Lats2         | 50523     | brown     |
| ENSMUSG00000078794 | Dact3         | 629378    | blue      |
| ENSMUSG00000068284 | Usf3          | 207806    | blue      |
| ENSMUSG00000029650 | Slc46a3       | 71706     | turquoise |
| ENSMUSG00000079215 | Zfp664        | 269704    | black     |
| ENSMUSG00000036381 | P2ry14        | 140795    | turquoise |
| ENSMUSG00000029655 | N4bp212       | 381695    | brown     |
| ENSMUSG00000019143 | Hars2         | 70791     | cyan      |
| ENSMUSG00000046897 | Zfp740        | 68744     | turquoise |
| ENSMUSG00000071281 | Zfp65         | 235907    | cyan      |
| ENSMUSG00000029657 | Hsph1         | 15505     | black     |
| ENSMUSG00000081797 | NA            | NA        | pink      |
| ENSMUSG00000057829 | NA            | NA        | tan       |
| ENSMUSG00000081798 | NA            | NA        | blue      |
| ENSMUSG00000025920 | Stau2         | 29819     | pink      |

|                    |               |           |              |
|--------------------|---------------|-----------|--------------|
| ENSMUSG00000025922 | NA            | NA        | pink         |
| ENSMUSG00000032652 | Crebl2        | 232430    | yellow       |
| ENSMUSG00000025925 | Terf1         | 21749     | turquoise    |
| ENSMUSG00000022141 | Nipbl         | 71175     | green        |
| ENSMUSG00000022142 | Nup155        | 170762    | blue         |
| ENSMUSG00000050310 | Rictor        | 78757     | turquoise    |
| ENSMUSG00000101609 | Kcnq1ot1      | 63830     | turquoise    |
| ENSMUSG00000050312 | NA            | NA        | brown        |
| ENSMUSG00000032657 | Fam189b       | 68521     | blue         |
| ENSMUSG00000022148 | NA            | NA        | red          |
| ENSMUSG00000000751 | Rpa1          | 68275     | brown        |
| ENSMUSG00000000759 | Tubgcp3       | 259279    | salmon       |
| ENSMUSG00000057594 | NA            | NA        | turquoise    |
| ENSMUSG00000068523 | Gng5          | 14707     | yellow       |
| ENSMUSG00000047084 | Ngrn          | 83485     | turquoise    |
| ENSMUSG00000047085 | Lrrc4b        | 272381    | turquoise    |
| ENSMUSG00000075254 | Heg1          | 77446     | black        |
| ENSMUSG00000058013 | 10-Sep        | 52398     | green        |
| ENSMUSG00000085767 | NA            | NA        | pink         |
| ENSMUSG00000008450 | Nutf2         | 68051     | red          |
| ENSMUSG00000036620 | Mgat4b        | 103534    | turquoise    |
| ENSMUSG00000018965 | Ywhah         | 22629     | red          |
| ENSMUSG00000060591 | Ifitm2        | 80876     | turquoise    |
| ENSMUSG00000036622 | Atp13a2       | 74772     | turquoise    |
| ENSMUSG00000026111 | Unc50         | 67387     | brown        |
| ENSMUSG00000026112 | Coa5          | 76178     | blue         |
| ENSMUSG00000026113 | Inpp4a        | 269180    | turquoise    |
| ENSMUSG00000015189 | Casd1         | 213819    | blue         |
| ENSMUSG00000026116 | Tmem131       | 56030     | pink         |
| ENSMUSG00000021962 | Dcp1a         | 75901     | brown        |
| ENSMUSG00000071528 | Usmg5         | 66477     | brown        |
| ENSMUSG00000050088 | 1600012H06Rik | 67912     | brown        |
| ENSMUSG00000021963 | Sap18         | 20220     | midnightblue |
| ENSMUSG00000021965 | Ska3          | 219114    | magenta      |
| ENSMUSG00000021967 | Mrpl57        | 67840     | turquoise    |
| ENSMUSG00000021969 | Zdhhc20       | 75965     | blue         |
| ENSMUSG00000068290 | Ddrgk1        | 77006     | turquoise    |
| ENSMUSG00000089736 | Tgfbr3l       | 100044509 | turquoise    |
| ENSMUSG00000079223 | NA            | NA        | blue         |
| ENSMUSG00000079224 | NA            | NA        | blue         |
| ENSMUSG00000079225 | NA            | NA        | black        |
| ENSMUSG00000068299 | 1700019G17Rik | 75541     | greenyellow  |
| ENSMUSG00000036390 | Gadd45a       | 13197     | turquoise    |
| ENSMUSG00000036391 | Sec24a        | 77371     | blue         |
| ENSMUSG00000057835 | Zfp119a       | 104349    | brown        |
| ENSMUSG00000071291 | Zfp58         | 238693    | turquoise    |
| ENSMUSG00000054051 | Ercc6         | 319955    | brown        |
| ENSMUSG00000029669 | Tspan12       | 269831    | turquoise    |
| ENSMUSG00000082220 | NA            | NA        | tan          |
| ENSMUSG00000036398 | Ppp1r11       | 76497     | blue         |
| ENSMUSG00000101610 | NA            | NA        | pink         |
| ENSMUSG00000019158 | Tmem160       | 69094     | brown        |
| ENSMUSG00000101612 | NA            | NA        | turquoise    |
| ENSMUSG00000025931 | Paqr8         | 74229     | purple       |

|                    |               |           |           |
|--------------------|---------------|-----------|-----------|
| ENSMUSG00000025932 | Eya1          | 14048     | turquoise |
| ENSMUSG00000025933 | Tmem14a       | 75712     | turquoise |
| ENSMUSG00000025935 | Tram1         | 72265     | brown     |
| ENSMUSG00000022151 | Ttc33         | 67515     | pink      |
| ENSMUSG00000025937 | NA            | NA        | turquoise |
| ENSMUSG00000032666 | 1700025G04Rik | 69399     | green     |
| ENSMUSG00000025939 | Ube2w         | 66799     | green     |
| ENSMUSG00000032667 | NA            | NA        | purple    |
| ENSMUSG00000050323 | Ndufaf6       | 76947     | turquoise |
| ENSMUSG00000022159 | Rab2b         | 76338     | green     |
| ENSMUSG00000047090 | Tmem198b      | 73827     | turquoise |
| ENSMUSG00000047098 | Rnf31         | 268749    | turquoise |
| ENSMUSG00000075266 | Cenpw         | 66311     | magenta   |
| ENSMUSG00000018974 | Sart3         | 53890     | cyan      |
| ENSMUSG00000053870 | Fpgt          | 75540     | brown     |
| ENSMUSG00000075268 | NA            | NA        | turquoise |
| ENSMUSG00000036632 | Alg5          | 66248     | green     |
| ENSMUSG00000036636 | Clcn7         | 26373     | blue      |
| ENSMUSG00000071532 | NA            | NA        | black     |
| ENSMUSG00000053877 | Srcap         | 100043597 | blue      |
| ENSMUSG00000026123 | Plekhh2       | 226971    | green     |
| ENSMUSG00000071533 | Pcnp          | 76302     | yellow    |
| ENSMUSG00000036639 | Nudt1         | 17766     | blue      |
| ENSMUSG00000026127 | NA            | NA        | green     |
| ENSMUSG00000021972 | Hmbox1        | 219150    | yellow    |
| ENSMUSG00000061024 | Rrs1          | 59014     | red       |
| ENSMUSG00000021973 | Micu2         | 68514     | blue      |
| ENSMUSG00000021975 | Ints9         | 210925    | blue      |
| ENSMUSG00000032902 | Slc16a1       | 20501     | turquoise |
| ENSMUSG00000061028 | Clasrp        | 53609     | blue      |
| ENSMUSG00000032905 | Atg12         | 67526     | turquoise |
| ENSMUSG00000021978 | Extl3         | 54616     | turquoise |
| ENSMUSG00000096472 | Cdkn2d        | 12581     | brown     |
| ENSMUSG00000096474 | NA            | NA        | black     |
| ENSMUSG00000079235 | Ccdc13        | 100502861 | turquoise |
| ENSMUSG00000029670 | Ing3          | 71777     | blue      |
| ENSMUSG00000029672 | Fam3c         | 27999     | red       |
| ENSMUSG00000057841 | Rpl32         | 19951     | black     |
| ENSMUSG00000029673 | NA            | NA        | turquoise |
| ENSMUSG00000057842 | Zfp595        | 218314    | green     |
| ENSMUSG00000029674 | Limk1         | 16885     | turquoise |
| ENSMUSG00000029675 | Eln           | 13717     | blue      |
| ENSMUSG00000029676 | Pot1a         | 101185    | green     |
| ENSMUSG00000025940 | Tmem70        | 70397     | blue      |
| ENSMUSG00000092746 | NA            | NA        | turquoise |
| ENSMUSG00000032673 | Prorsd1       | 67939     | blue      |
| ENSMUSG00000022160 | Mettl3        | 56335     | turquoise |
| ENSMUSG00000050332 | Amer1         | 72345     | turquoise |
| ENSMUSG00000025949 | Pikfyve       | 18711     | turquoise |
| ENSMUSG00000050334 | C130071C03Rik | 320203    | brown     |
| ENSMUSG00000032679 | Cd59a         | 12509     | yellow    |
| ENSMUSG00000000776 | Polr3d        | 67065     | pink      |
| ENSMUSG00000085783 | NA            | NA        | blue      |
| ENSMUSG00000075271 | NA            | NA        | brown     |

|                    |          |        |              |
|--------------------|----------|--------|--------------|
| ENSMUSG00000075273 | Ttc30b   | 72421  | turquoise    |
| ENSMUSG00000085787 | NA       | NA     | blue         |
| ENSMUSG00000029910 | Mad2l1   | 56150  | magenta      |
| ENSMUSG00000029911 | Ssbp1    | 381760 | brown        |
| ENSMUSG00000075279 | NA       | NA     | blue         |
| ENSMUSG00000029913 | Prdm5    | 70779  | turquoise    |
| ENSMUSG00000036641 | Ccdc148  | 227933 | turquoise    |
| ENSMUSG00000008475 | Arpc5    | 67771  | brown        |
| ENSMUSG00000043372 | Hexim2   | 71059  | turquoise    |
| ENSMUSG00000036644 | Tbc1d9b  | 76795  | turquoise    |
| ENSMUSG00000026131 | Dst      | 13518  | turquoise    |
| ENSMUSG00000029916 | Agk      | 69923  | turquoise    |
| ENSMUSG00000029918 | Mrps33   | 14548  | turquoise    |
| ENSMUSG00000036646 | Man1b1   | 227619 | blue         |
| ENSMUSG00000054302 | Eapp     | 66266  | turquoise    |
| ENSMUSG00000026134 | Prim2    | 19076  | magenta      |
| ENSMUSG00000026135 | Zfp142   | 77264  | turquoise    |
| ENSMUSG00000061032 | Rrp1     | 18114  | black        |
| ENSMUSG00000054304 | NA       | NA     | yellow       |
| ENSMUSG00000021981 | Cab39l   | 69008  | yellow       |
| ENSMUSG00000021982 | Cdadcl1  | 71891  | turquoise    |
| ENSMUSG00000071547 | Nt5dc2   | 70021  | salmon       |
| ENSMUSG00000054309 | Cpsf3    | 54451  | green        |
| ENSMUSG00000022400 | Rbx1     | 56438  | blue         |
| ENSMUSG00000021986 | Amer2    | 72125  | turquoise    |
| ENSMUSG00000032913 | Lrig2    | 269473 | turquoise    |
| ENSMUSG00000022401 | Xpnpep3  | 321003 | turquoise    |
| ENSMUSG00000021987 | Mttr6    | 219135 | brown        |
| ENSMUSG00000022403 | NA       | NA     | midnightblue |
| ENSMUSG00000004748 | Mtfp1    | 67900  | greenyellow  |
| ENSMUSG00000022404 | Slc25a17 | 20524  | turquoise    |
| ENSMUSG00000022407 | Adsl     | 11564  | black        |
| ENSMUSG00000089756 | Gm8898   | 667962 | grey60       |
| ENSMUSG00000029681 | Bcl7b    | 12054  | turquoise    |
| ENSMUSG00000029684 | Wasl     | 73178  | turquoise    |
| ENSMUSG00000019173 | Rab5c    | 19345  | turquoise    |
| ENSMUSG00000029686 | Cul1     | 26965  | green        |
| ENSMUSG00000047342 | Zfp286   | 192651 | blue         |
| ENSMUSG00000029687 | Ezh2     | 14056  | magenta      |
| ENSMUSG00000057858 | Fam204a  | 76539  | blue         |
| ENSMUSG00000082241 | NA       | NA     | yellow       |
| ENSMUSG00000054074 | Skida1   | 72668  | turquoise    |
| ENSMUSG00000075514 | NA       | NA     | turquoise    |
| ENSMUSG00000047347 | NA       | NA     | lightcyan    |
| ENSMUSG00000025950 | Idh1     | 15926  | blue         |
| ENSMUSG00000019179 | Mdh2     | 17448  | green        |
| ENSMUSG00000082245 | NA       | NA     | cyan         |
| ENSMUSG00000054079 | Utp18    | 217109 | black        |
| ENSMUSG00000025956 | Mettl21a | 67099  | turquoise    |
| ENSMUSG00000025958 | Creb1    | 12912  | blue         |
| ENSMUSG00000022174 | Dad1     | 13135  | turquoise    |
| ENSMUSG00000043614 | Vps37d   | 194309 | turquoise    |
| ENSMUSG00000025959 | NA       | NA     | yellow       |
| ENSMUSG00000033102 | Cdc14b   | 218294 | turquoise    |

|                     |               |        |              |
|---------------------|---------------|--------|--------------|
| ENSMUSG00000022175  | NA            | NA     | blue         |
| ENSMUSG00000033105  | NA            | NA     | greenyellow  |
| ENSMUSG00000043618  | NA            | NA     | tan          |
| ENSMUSG00000033106  | Slc7a6os      | 66432  | brown        |
| ENSMUSG00000000787  | Ddx3x         | 13205  | brown        |
| ENSMUSG000000085791 | NA            | NA     | pink         |
| ENSMUSG00000068551  | Zfp467        | 68910  | greenyellow  |
| ENSMUSG00000085793  | Lin52         | 217708 | brown        |
| ENSMUSG00000085795  | Zfp703        | 353310 | turquoise    |
| ENSMUSG00000075284  | Wipf1         | 215280 | turquoise    |
| ENSMUSG00000105600  | NA            | NA     | cyan         |
| ENSMUSG00000105601  | NA            | NA     | brown        |
| ENSMUSG00000029920  | Smardc1       | 13990  | green        |
| ENSMUSG00000096726  | NA            | NA     | lightcyan    |
| ENSMUSG00000075288  | NA            | NA     | yellow       |
| ENSMUSG00000018995  | Nars2         | 244141 | turquoise    |
| ENSMUSG00000029922  | Mkrm1         | 54484  | blue         |
| ENSMUSG00000029924  | Slc37a3       | 72144  | turquoise    |
| ENSMUSG00000018999  | NA            | NA     | turquoise    |
| ENSMUSG00000026142  | Rhbdd1        | 76867  | brown        |
| ENSMUSG00000043384  | Gprasp1       | 67298  | yellow       |
| ENSMUSG00000054312  | Mrps21        | 66292  | blue         |
| ENSMUSG00000053898  | Ech1          | 51798  | turquoise    |
| ENSMUSG00000021993  | Mipep         | 70478  | green        |
| ENSMUSG00000061046  | Haghl         | 68977  | turquoise    |
| ENSMUSG00000021996  | Esd           | 13885  | blue         |
| ENSMUSG00000022412  | Mief1         | 239555 | brown        |
| ENSMUSG00000022414  | Tab1          | 66513  | turquoise    |
| ENSMUSG00000022415  | Syngn1        | 20972  | turquoise    |
| ENSMUSG00000022419  | Deptor        | 97998  | turquoise    |
| ENSMUSG00000089764  | NA            | NA     | pink         |
| ENSMUSG00000057863  | Rpl36         | 54217  | black        |
| ENSMUSG00000019188  | H13           | 14950  | turquoise    |
| ENSMUSG00000019189  | Rnf145        | 74315  | turquoise    |
| ENSMUSG00000082253  | NA            | NA     | lightcyan    |
| ENSMUSG00000025962  | NA            | NA     | cyan         |
| ENSMUSG00000075528  | Aarsd1        | 69684  | blue         |
| ENSMUSG00000060860  | Ube2s         | 77891  | magenta      |
| ENSMUSG00000025964  | Adam23        | 23792  | turquoise    |
| ENSMUSG00000060862  | Zbtb40        | 230848 | turquoise    |
| ENSMUSG00000025967  | Eef1b2        | 55949  | black        |
| ENSMUSG00000025968  | Ndufs1        | 227197 | turquoise    |
| ENSMUSG00000033111  | 3830406C13Rik | 218734 | turquoise    |
| ENSMUSG00000022185  | Acin1         | 56215  | green        |
| ENSMUSG00000022186  | Oxct1         | 67041  | midnightblue |
| ENSMUSG00000043629  | 1700019D03Rik | 67080  | turquoise    |
| ENSMUSG00000000794  | NA            | NA     | yellow       |
| ENSMUSG00000001211  | Agpat3        | 28169  | turquoise    |
| ENSMUSG00000058050  | NA            | NA     | black        |
| ENSMUSG00000058056  | Palld         | 72333  | turquoise    |
| ENSMUSG00000043391  | 2510009E07Rik | 72190  | turquoise    |
| ENSMUSG00000026150  | Mff           | 75734  | turquoise    |
| ENSMUSG00000086229  | NA            | NA     | turquoise    |
| ENSMUSG00000054321  | Taf4b         | 72504  | yellow       |

|                    |               |           |              |
|--------------------|---------------|-----------|--------------|
| ENSMUSG00000026153 | Fam135a       | 68187     | turquoise    |
| ENSMUSG00000026154 | Sdhaf4        | 68002     | blue         |
| ENSMUSG00000036667 | Tcaf1         | 77574     | turquoise    |
| ENSMUSG00000026155 | Smap1         | 98366     | brown        |
| ENSMUSG00000019428 | Fkbp8         | 14232     | brown        |
| ENSMUSG00000026158 | Ogfrl1        | 70155     | turquoise    |
| ENSMUSG00000071568 | NA            | NA        | green        |
| ENSMUSG00000026159 | Agfg1         | 15463     | blue         |
| ENSMUSG00000032932 | Hspa13        | 110920    | turquoise    |
| ENSMUSG00000022420 | Dnal4         | 54152     | brown        |
| ENSMUSG00000022421 | Nptxr         | 73340     | blue         |
| ENSMUSG00000022422 | Dscc1         | 72107     | magenta      |
| ENSMUSG00000004768 | Rab23         | 19335     | turquoise    |
| ENSMUSG00000022425 | Enpp2         | 18606     | turquoise    |
| ENSMUSG00000022426 | Josd1         | 74158     | turquoise    |
| ENSMUSG00000032939 | Nup93         | 71805     | salmon       |
| ENSMUSG00000022427 | Tomm22        | 223696    | turquoise    |
| ENSMUSG00000022428 | Cby1          | 73739     | brown        |
| ENSMUSG00000079260 | Tmppe         | 100504715 | turquoise    |
| ENSMUSG00000089774 | Slc5a3        | 53881     | turquoise    |
| ENSMUSG00000047361 | Gm973         | 381260    | yellow       |
| ENSMUSG00000105388 | NA            | NA        | black        |
| ENSMUSG00000054091 | 1810037117Rik | 67704     | turquoise    |
| ENSMUSG00000082260 | NA            | NA        | tan          |
| ENSMUSG00000101652 | NA            | NA        | lightcyan    |
| ENSMUSG00000047368 | Abhd17b       | 226016    | blue         |
| ENSMUSG00000008730 | Hipk1         | 15257     | turquoise    |
| ENSMUSG00000025971 | NA            | NA        | yellow       |
| ENSMUSG00000082264 | NA            | NA        | blue         |
| ENSMUSG00000015461 | Atf6b         | 12915     | turquoise    |
| ENSMUSG00000054099 | Slc25a40      | 319653    | turquoise    |
| ENSMUSG00000008734 | Gprc5b        | 64297     | purple       |
| ENSMUSG00000022191 | Drosha        | 14000     | green        |
| ENSMUSG00000022193 | Psm5          | 19173     | midnightblue |
| ENSMUSG00000025978 | Rftn2         | 74013     | midnightblue |
| ENSMUSG00000043633 | Fam221b       | 242408    | red          |
| ENSMUSG00000022194 | NA            | NA        | lightcyan    |
| ENSMUSG00000025979 | Mob4          | 19070     | green        |
| ENSMUSG00000015467 | Egfl8         | 81701     | turquoise    |
| ENSMUSG00000022195 | 6030458C11Rik | 77877     | turquoise    |
| ENSMUSG00000022197 | Pdzd2         | 68070     | turquoise    |
| ENSMUSG00000033124 | Atg9a         | 245860    | yellow       |
| ENSMUSG00000022199 | Slc22a17      | 59049     | black        |
| ENSMUSG00000033126 | Ybey          | 216119    | turquoise    |
| ENSMUSG00000033128 | Gga1          | 106039    | turquoise    |
| ENSMUSG00000001228 | Uhrf1         | 18140     | salmon       |
| ENSMUSG00000001229 | Dpp9          | 224897    | turquoise    |
| ENSMUSG00000079501 | NA            | NA        | turquoise    |
| ENSMUSG00000058064 | NA            | NA        | black        |
| ENSMUSG00000079505 | NA            | NA        | blue         |
| ENSMUSG00000068579 | NA            | NA        | lightcyan    |
| ENSMUSG00000079508 | Apoo          | 68316     | brown        |
| ENSMUSG00000036672 | Cenpt         | 320394    | blue         |
| ENSMUSG00000079509 | Zfx           | 22764     | blue         |

|                    |          |           |              |
|--------------------|----------|-----------|--------------|
| ENSMUSG00000019432 | Ddx39b   | 53817     | red          |
| ENSMUSG00000019433 | Gipc1    | 67903     | green        |
| ENSMUSG00000036676 | Tmtc3    | 237500    | pink         |
| ENSMUSG00000047603 | NA       | NA        | turquoise    |
| ENSMUSG00000071573 | Rnls     | 67795     | yellow       |
| ENSMUSG00000036678 | Aaas     | 223921    | blue         |
| ENSMUSG00000019437 | Tlcd1    | 68385     | yellow       |
| ENSMUSG00000061062 | NA       | NA        | blue         |
| ENSMUSG00000004771 | Rab11a   | 53869     | midnightblue |
| ENSMUSG00000032942 | Ucp3     | 22229     | yellow       |
| ENSMUSG00000015702 | Anxa9    | 71790     | lightcyan    |
| ENSMUSG00000032946 | Rasgrp2  | 19395     | turquoise    |
| ENSMUSG00000022433 | Csnk1e   | 27373     | red          |
| ENSMUSG00000022434 | Fam118a  | 73225     | pink         |
| ENSMUSG00000022436 | Sh3bp1   | 20401     | blue         |
| ENSMUSG00000022437 | Samm50   | 68653     | turquoise    |
| ENSMUSG00000050605 | Zfp61    | 22719     | pink         |
| ENSMUSG00000015709 | Arnt2    | 11864     | turquoise    |
| ENSMUSG00000089782 | NA       | NA        | blue         |
| ENSMUSG00000050608 | Minos1   | 433771    | brown        |
| ENSMUSG00000089788 | NA       | NA        | blue         |
| ENSMUSG00000057880 | Abat     | 268860    | yellow       |
| ENSMUSG00000047370 | NA       | NA        | turquoise    |
| ENSMUSG00000047371 | Zfp768   | 233890    | turquoise    |
| ENSMUSG00000057886 | NA       | NA        | red          |
| ENSMUSG00000058301 | Upf1     | 19704     | blue         |
| ENSMUSG00000082272 | NA       | NA        | lightcyan    |
| ENSMUSG00000025980 | Hspd1    | 15510     | green        |
| ENSMUSG00000025981 | Coq10b   | 67876     | green        |
| ENSMUSG00000082274 | NA       | NA        | turquoise    |
| ENSMUSG00000047379 | B4gat1   | 108902    | yellow       |
| ENSMUSG00000025982 | Sf3b1    | 81898     | blue         |
| ENSMUSG00000065037 | Rn7sk    | 19817     | turquoise    |
| ENSMUSG00000036913 | Trim67   | 330863    | green        |
| ENSMUSG00000025986 | Slc39a10 | 227059    | green        |
| ENSMUSG00000015474 | Ppt2     | 54397     | blue         |
| ENSMUSG00000036915 | Kirrel2  | 243911    | turquoise    |
| ENSMUSG00000036916 | Zfp280c  | 208968    | turquoise    |
| ENSMUSG00000026404 | Ddx59    | 67997     | blue         |
| ENSMUSG00000050373 | NA       | NA        | turquoise    |
| ENSMUSG00000015478 | Rnf5     | 54197     | turquoise    |
| ENSMUSG00000026409 | Pfkfb2   | 18640     | turquoise    |
| ENSMUSG00000061306 | Slc38a10 | 72055     | blue         |
| ENSMUSG00000050379 | 5-Sep    | 56526     | brown        |
| ENSMUSG00000068580 | Zfyve19  | 72008     | blue         |
| ENSMUSG00000058070 | Eml1     | 68519     | turquoise    |
| ENSMUSG00000086240 | NA       | NA        | red          |
| ENSMUSG00000058073 | NA       | NA        | brown        |
| ENSMUSG00000096755 | NA       | NA        | tan          |
| ENSMUSG00000058076 | NA       | NA        | midnightblue |
| ENSMUSG00000086247 | Gm15787  | 100504007 | turquoise    |
| ENSMUSG00000026171 | Rnf25    | 57751     | blue         |
| ENSMUSG00000026172 | Bcs1l    | 66821     | green        |
| ENSMUSG00000036686 | Cc2d1a   | 212139    | turquoise    |

|                    |               |        |           |
|--------------------|---------------|--------|-----------|
| ENSMUSG00000047613 | A430005L14Rik | 97159  | pink      |
| ENSMUSG00000026173 | Plcd4         | 18802  | black     |
| ENSMUSG00000082510 | NA            | NA     | brown     |
| ENSMUSG00000026174 | Rqcd1         | 58184  | black     |
| ENSMUSG00000037103 | Dcaf15        | 212123 | brown     |
| ENSMUSG00000026176 | Ctdsp1        | 227292 | turquoise |
| ENSMUSG00000047617 | BC029214      | 227622 | yellow    |
| ENSMUSG00000026179 | Pnkd          | 56695  | yellow    |
| ENSMUSG00000082516 | NA            | NA     | yellow    |
| ENSMUSG00000037108 | Zcwpw1        | 381678 | magenta   |
| ENSMUSG00000015711 | Prune         | 229589 | turquoise |
| ENSMUSG00000032952 | Ap4b1         | 67489  | turquoise |
| ENSMUSG00000061079 | Zfp143        | 20841  | blue      |
| ENSMUSG00000082519 | NA            | NA     | green     |
| ENSMUSG00000022442 | Tll1          | 319953 | turquoise |
| ENSMUSG00000015714 | Cers2         | 76893  | turquoise |
| ENSMUSG00000022443 | Myh9          | 17886  | green     |
| ENSMUSG00000004788 | Eif2b2        | 217715 | brown     |
| ENSMUSG00000004789 | Dlst          | 78920  | green     |
| ENSMUSG00000005204 | Senp3         | 80886  | turquoise |
| ENSMUSG00000032959 | Pebp1         | 23980  | purple    |
| ENSMUSG00000040102 | Klhl42        | 232539 | turquoise |
| ENSMUSG00000050619 | Zscan29       | 99334  | blue      |
| ENSMUSG00000079283 | 2310009B15Rik | 69549  | turquoise |
| ENSMUSG00000057894 | Zfp329        | 67230  | turquoise |
| ENSMUSG00000057895 | Zfp105        | 22646  | turquoise |
| ENSMUSG00000068823 | Csde1         | 229663 | green     |
| ENSMUSG00000082280 | NA            | NA     | turquoise |
| ENSMUSG00000082283 | NA            | NA     | brown     |
| ENSMUSG00000082284 | NA            | NA     | black     |
| ENSMUSG00000082286 | NA            | NA     | yellow    |
| ENSMUSG00000058317 | Ube2e2        | 218793 | turquoise |
| ENSMUSG00000075558 | NA            | NA     | pink      |
| ENSMUSG00000058318 | Phf21a        | 192285 | turquoise |
| ENSMUSG00000025995 | Wdr75         | 73674  | brown     |
| ENSMUSG00000082289 | NA            | NA     | cyan      |
| ENSMUSG00000025997 | Ikzf2         | 22779  | turquoise |
| ENSMUSG00000026411 | Tmem9         | 66241  | brown     |
| ENSMUSG00000050382 | Kif7          | 16576  | turquoise |
| ENSMUSG00000015488 | Cacfd1        | 381356 | turquoise |
| ENSMUSG00000061313 | Ddhd2         | 72108  | brown     |
| ENSMUSG00000061315 | Naca          | 17938  | blue      |
| ENSMUSG00000011752 | Pgam1         | 18648  | turquoise |
| ENSMUSG00000033149 | Phldb2        | 208177 | grey60    |
| ENSMUSG00000001240 | NA            | NA     | turquoise |
| ENSMUSG00000001248 | Gramd1a       | 52857  | turquoise |
| ENSMUSG00000079523 | Tmsb10        | 19240  | red       |
| ENSMUSG00000069011 | NA            | NA     | red       |
| ENSMUSG00000105643 | NA            | NA     | blue      |
| ENSMUSG00000096768 | Erdr1         | 170942 | red       |
| ENSMUSG00000069014 | NA            | NA     | turquoise |
| ENSMUSG00000036693 | Nop14         | 75416  | turquoise |
| ENSMUSG00000037110 | Ralgapa2      | 241694 | brown     |
| ENSMUSG00000061080 | Lsamp         | 268890 | red       |



|                    |               |           |              |
|--------------------|---------------|-----------|--------------|
| ENSMUSG00000037111 | Setd7         | 73251     | turquoise    |
| ENSMUSG00000036698 | NA            | NA        | blue         |
| ENSMUSG00000037112 | Sik2          | 235344    | turquoise    |
| ENSMUSG00000026185 | Igfbp5        | 16011     | purple       |
| ENSMUSG00000026187 | Xrcc5         | 22596     | green        |
| ENSMUSG00000026189 | Pecr          | 111175    | turquoise    |
| ENSMUSG00000022450 | Ndufa6        | 67130     | black        |
| ENSMUSG00000037119 | D15Erttd621e  | 210998    | grey60       |
| ENSMUSG00000022451 | Twf1          | 19230     | green        |
| ENSMUSG00000032965 | Ift57         | 73916     | turquoise    |
| ENSMUSG00000022452 | Smdt1         | 69029     | midnightblue |
| ENSMUSG00000022453 | Naga          | 17939     | green        |
| ENSMUSG00000004798 | Ulk2          | 29869     | turquoise    |
| ENSMUSG00000050621 | Rps27rt       | 100043813 | black        |
| ENSMUSG00000032966 | Fkbp1a        | 14225     | black        |
| ENSMUSG00000022454 | Nell2         | 54003     | red          |
| ENSMUSG00000022456 | 2-Sep         | 24050     | green        |
| ENSMUSG00000040111 | Gramd1b       | 235283    | turquoise    |
| ENSMUSG00000040112 | NA            | NA        | turquoise    |
| ENSMUSG00000050627 | Gpd1l         | 333433    | brown        |
| ENSMUSG00000050628 | Ubald2        | 319370    | turquoise    |
| ENSMUSG00000079297 | NA            | NA        | green        |
| ENSMUSG00000101682 | NA            | NA        | turquoise    |
| ENSMUSG00000058325 | Dock1         | 330662    | blue         |
| ENSMUSG00000008763 | Man1a2        | 17156     | turquoise    |
| ENSMUSG00000036932 | Aifm1         | 26926     | green        |
| ENSMUSG00000036934 | 4921524J17Rik | 66714     | turquoise    |
| ENSMUSG00000026421 | Csrp1         | 13007     | yellow       |
| ENSMUSG00000050390 | C77080        | 97130     | blue         |
| ENSMUSG00000026424 | Gpr3711       | 171469    | purple       |
| ENSMUSG00000026425 | Srgap2        | 14270     | blue         |
| ENSMUSG00000050394 | Armxcx6       | 278097    | turquoise    |
| ENSMUSG00000026426 | Arl8a         | 68724     | turquoise    |
| ENSMUSG00000043668 | Tox3          | 244579    | red          |
| ENSMUSG00000026427 | Eif2d         | 16865     | turquoise    |
| ENSMUSG00000033157 | Abhd10        | 213012    | turquoise    |
| ENSMUSG00000033159 | Cnppd1        | 69171     | turquoise    |
| ENSMUSG00000058093 | Zfp729b       | 100416706 | brown        |
| ENSMUSG00000069020 | Urm1          | 68205     | green        |
| ENSMUSG00000019461 | Plscr3        | 70310     | green        |
| ENSMUSG00000047632 | Fgfbp3        | 72514     | turquoise    |
| ENSMUSG00000019464 | NA            | NA        | yellow       |
| ENSMUSG00000105659 | NA            | NA        | cyan         |
| ENSMUSG00000026192 | Atic          | 108147    | turquoise    |
| ENSMUSG00000082530 | NA            | NA        | blue         |
| ENSMUSG00000019467 | Arhgef25      | 52666     | turquoise    |
| ENSMUSG00000047635 | 2810006K23Rik | 72650     | red          |
| ENSMUSG00000054364 | Rhob          | 11852     | turquoise    |
| ENSMUSG00000026197 | Zfand2b       | 68818     | turquoise    |
| ENSMUSG00000026198 | Abcb6         | 74104     | yellow       |
| ENSMUSG00000037126 | Psd           | 73728     | turquoise    |
| ENSMUSG00000026199 | Ankzf1        | 52231     | yellow       |
| ENSMUSG00000082536 | NA            | NA        | black        |
| ENSMUSG00000061099 | Gapdhs        | 14447     | greenyellow  |

|                    |          |           |              |
|--------------------|----------|-----------|--------------|
| ENSMUSG00000015733 | NA       | NA        | blue         |
| ENSMUSG00000022462 | Slc38a2  | 67760     | blue         |
| ENSMUSG00000022463 | Srebf2   | 20788     | turquoise    |
| ENSMUSG00000032977 | Fam207a  | 108707    | green        |
| ENSMUSG00000022466 | Rpap3    | 71919     | brown        |
| ENSMUSG00000040123 | Zmym5    | 219105    | blue         |
| ENSMUSG00000022469 | Rapgef3  | 223864    | turquoise    |
| ENSMUSG00000040124 | Gorab    | 98376     | turquoise    |
| ENSMUSG00000043909 | Trp53bp1 | 27223     | blue         |
| ENSMUSG00000040128 | Pnrc1    | 108767    | midnightblue |
| ENSMUSG00000058331 | Zfp85    | 22746     | turquoise    |
| ENSMUSG00000086502 | NA       | NA        | blue         |
| ENSMUSG00000075576 | Gm12359  | 100037262 | turquoise    |
| ENSMUSG00000036940 | Kdm1a    | 99982     | brown        |
| ENSMUSG00000036941 | Elac1    | 114615    | grey60       |
| ENSMUSG00000101698 | NA       | NA        | turquoise    |
| ENSMUSG00000036943 | Rab8b    | 235442    | red          |
| ENSMUSG00000043671 | Dpy19l3  | 233115    | yellow       |
| ENSMUSG00000093238 | Mir9-3   | 723968    | yellow       |
| ENSMUSG00000033161 | Atp1a1   | 11928     | yellow       |
| ENSMUSG00000061330 | NA       | NA        | black        |
| ENSMUSG00000026434 | Nucks1   | 98415     | black        |
| ENSMUSG00000102117 | NA       | NA        | tan          |
| ENSMUSG00000036948 | BC037034 | 231807    | turquoise    |
| ENSMUSG00000054604 | Cggbp1   | 106143    | green        |
| ENSMUSG00000026436 | Elk4     | 13714     | turquoise    |
| ENSMUSG00000036949 | Slc39a12 | 277468    | purple       |
| ENSMUSG00000033166 | Dis3     | 72662     | turquoise    |
| ENSMUSG00000026439 | NA       | NA        | green        |
| ENSMUSG00000001260 | Gabrg1   | 14405     | purple       |
| ENSMUSG00000022701 | Ccdc191  | 212153    | turquoise    |
| ENSMUSG00000022704 | Qtrtd1   | 106248    | green        |
| ENSMUSG00000022706 | Mrpl40   | 18100     | green        |
| ENSMUSG00000022707 | Gbe1     | 74185     | turquoise    |
| ENSMUSG00000096780 | NA       | NA        | turquoise    |
| ENSMUSG00000022708 | Zbtb20   | 56490     | green        |
| ENSMUSG00000096789 | NA       | NA        | black        |
| ENSMUSG00000019470 | Xab2     | 67439     | greenyellow  |
| ENSMUSG00000019471 | Cdc37    | 12539     | red          |
| ENSMUSG00000097204 | NA       | NA        | turquoise    |
| ENSMUSG00000047643 | NA       | NA        | green        |
| ENSMUSG00000082541 | NA       | NA        | pink         |
| ENSMUSG00000019478 | Rab4a    | 19341     | turquoise    |
| ENSMUSG00000082542 | NA       | NA        | turquoise    |
| ENSMUSG00000101932 | NA       | NA        | grey60       |
| ENSMUSG00000037134 | Prmt10   | 102182    | turquoise    |
| ENSMUSG00000082543 | NA       | NA        | pink         |
| ENSMUSG00000047648 | Fbxo30   | 71865     | blue         |
| ENSMUSG00000047649 | NA       | NA        | turquoise    |
| ENSMUSG00000101935 | NA       | NA        | turquoise    |
| ENSMUSG00000037138 | Aff3     | 16764     | blue         |
| ENSMUSG00000101937 | NA       | NA        | turquoise    |
| ENSMUSG00000022471 | Xrcc6    | 14375     | turquoise    |
| ENSMUSG00000082549 | NA       | NA        | brown        |

|                    |               |       |           |             |
|--------------------|---------------|-------|-----------|-------------|
| ENSMUSG00000022472 | Desi1         |       | 28075     | turquoise   |
| ENSMUSG00000101939 | NA            | NA    |           | yellow      |
| ENSMUSG00000033400 | Agl           |       | 77559     | yellow      |
| ENSMUSG00000015745 | Plekho1       |       | 67220     | turquoise   |
| ENSMUSG00000022474 | Pmm1          |       | 29858     | yellow      |
| ENSMUSG00000005233 | Spc25         |       | 66442     | magenta     |
| ENSMUSG00000022475 | Hdac7         |       | 56233     | turquoise   |
| ENSMUSG00000015747 | Vps45         |       | 22365     | turquoise   |
| ENSMUSG00000022476 | Polr3h        |       | 78929     | turquoise   |
| ENSMUSG00000015748 | Prpf3         |       | 70767     | red         |
| ENSMUSG00000022477 | Aco2          |       | 11429     | brown       |
| ENSMUSG00000015749 | Anp32e        |       | 66471     | red         |
| ENSMUSG00000040138 | Ndp           |       | 17986     | yellow      |
| ENSMUSG00000040139 | 9430038I01Rik |       | 77252     | red         |
| ENSMUSG00000075581 | NA            | NA    |           | tan         |
| ENSMUSG00000068854 | Hist2h2be     |       | 319190    | turquoise   |
| ENSMUSG00000068856 | Sf3b4         |       | 107701    | black       |
| ENSMUSG00000075587 | NA            | NA    |           | pink        |
| ENSMUSG00000086515 | NA            | NA    |           | turquoise   |
| ENSMUSG00000019710 | NA            | NA    |           | red         |
| ENSMUSG00000043683 | Fem1a         |       | 14154     | turquoise   |
| ENSMUSG00000036955 | Kif1bp        |       | 72320     | turquoise   |
| ENSMUSG00000054611 | Kdm2a         |       | 225876    | blue        |
| ENSMUSG00000019715 | NA            | NA    |           | blue        |
| ENSMUSG00000019718 | L3hypdh       |       | 67217     | brown       |
| ENSMUSG00000043687 | 1190005I06Rik |       | 68918     | greenyellow |
| ENSMUSG00000033174 | Mgll          |       | 23945     | red         |
| ENSMUSG00000071856 | Mcc           |       | 328949    | turquoise   |
| ENSMUSG00000009207 | NA            | NA    |           | green       |
| ENSMUSG00000022710 | Usp7          |       | 252870    | blue        |
| ENSMUSG00000001270 | Ckb           |       | 12709     | tan         |
| ENSMUSG00000022711 | Pmm2          |       | 54128     | turquoise   |
| ENSMUSG00000022718 | Dgcr8         |       | 94223     | green       |
| ENSMUSG00000079553 | Kifc1         |       | 100502766 | magenta     |
| ENSMUSG00000096795 | Zfp433        |       | 73610     | turquoise   |
| ENSMUSG00000079555 | Haus3         |       | 231123    | turquoise   |
| ENSMUSG00000079557 |               | 1-Mar | 224703    | blue        |
| ENSMUSG00000029992 | Gfpt1         |       | 14583     | blue        |
| ENSMUSG00000069045 | Ddx3y         |       | 26900     | brown       |
| ENSMUSG00000029993 | Nfu1          |       | 56748     | blue        |
| ENSMUSG00000086287 | Gm15972       |       | 100502834 | turquoise   |
| ENSMUSG00000029994 | Anxa4         |       | 11746     | yellow      |
| ENSMUSG00000086288 | NA            | NA    |           | turquoise   |
| ENSMUSG00000069049 | Eif2s3y       |       | 26908     | blue        |
| ENSMUSG00000029998 | Pcyox1        |       | 66881     | brown       |
| ENSMUSG00000082550 | NA            | NA    |           | yellow      |
| ENSMUSG00000019487 | Trip10        |       | 106628    | turquoise   |
| ENSMUSG00000047656 | Trpt1         |       | 107328    | turquoise   |
| ENSMUSG00000047657 | NA            | NA    |           | brown       |
| ENSMUSG00000047658 | Gal3st3       |       | 545276    | turquoise   |
| ENSMUSG00000054387 | Mdm4          |       | 17248     | turquoise   |
| ENSMUSG00000101945 | NA            | NA    |           | blue        |
| ENSMUSG00000015750 | Aph1a         |       | 226548    | turquoise   |
| ENSMUSG00000037148 | Arhgap10      |       | 78514     | cyan        |

|                    |               |           |              |
|--------------------|---------------|-----------|--------------|
| ENSMUSG00000037149 | Ddx1          | 104721    | red          |
| ENSMUSG00000043923 | Ccdc84        | 382073    | turquoise    |
| ENSMUSG00000015755 | Tab2          | 68652     | turquoise    |
| ENSMUSG00000033411 | NA            | NA        | green        |
| ENSMUSG00000032997 | Chpf          | 74241     | yellow       |
| ENSMUSG00000015757 | Ppil4         | 67418     | green        |
| ENSMUSG00000032998 | Foxj3         | 230700    | turquoise    |
| ENSMUSG00000015759 | Cnih1         | 12793     | turquoise    |
| ENSMUSG00000033416 | Gucd1         | 68778     | brown        |
| ENSMUSG00000043929 | Klhl15        | 236904    | turquoise    |
| ENSMUSG00000033417 | Cacul1        | 78832     | turquoise    |
| ENSMUSG00000040146 | Rgl3          | 71746     | turquoise    |
| ENSMUSG00000040147 | Maob          | 109731    | turquoise    |
| ENSMUSG00000075590 | Nrbp2         | 223649    | turquoise    |
| ENSMUSG00000001518 | Itfg2         | 101142    | pink         |
| ENSMUSG00000075591 | NA            | NA        | blue         |
| ENSMUSG00000075592 | Nynrin        | 277154    | turquoise    |
| ENSMUSG00000058351 | NA            | NA        | turquoise    |
| ENSMUSG00000075595 | Zfp652        | 268469    | turquoise    |
| ENSMUSG00000058355 | Abce1         | 24015     | green        |
| ENSMUSG00000058357 | NA            | NA        | greenyellow  |
| ENSMUSG00000105914 | NA            | NA        | tan          |
| ENSMUSG00000071862 | Lrrtm2        | 107065    | turquoise    |
| ENSMUSG00000036966 | Spryd3        | 223918    | turquoise    |
| ENSMUSG00000102135 | NA            | NA        | black        |
| ENSMUSG00000019726 | Lyst          | 17101     | blue         |
| ENSMUSG00000102136 | NA            | NA        | yellow       |
| ENSMUSG00000026455 | Klhl12        | 240756    | blue         |
| ENSMUSG00000036968 | Cnpy4         | 66455     | blue         |
| ENSMUSG00000033184 | NA            | NA        | turquoise    |
| ENSMUSG00000026456 | Cyb5r1        | 72017     | brown        |
| ENSMUSG00000071866 | NA            | NA        | black        |
| ENSMUSG00000026457 | NA            | NA        | turquoise    |
| ENSMUSG00000071867 | NA            | NA        | blue         |
| ENSMUSG00000033186 | Mzt1          | 76789     | red          |
| ENSMUSG00000044117 | 2900011O08Rik | 67254     | turquoise    |
| ENSMUSG00000001280 | Sp1           | 20683     | pink         |
| ENSMUSG00000022721 | Trmt2a        | 15547     | turquoise    |
| ENSMUSG00000022722 | Arl6          | 56297     | green        |
| ENSMUSG00000022723 | NA            | NA        | turquoise    |
| ENSMUSG00000022724 | Mina          | 67014     | blue         |
| ENSMUSG00000001285 | Myg1          | 60315     | brown        |
| ENSMUSG00000001289 | NA            | NA        | yellow       |
| ENSMUSG00000079562 | Maea          | 59003     | turquoise    |
| ENSMUSG00000086290 | Snhg12        | 100039864 | pink         |
| ENSMUSG00000079564 | NA            | NA        | yellow       |
| ENSMUSG00000069053 | Uba1y         | 22202     | blue         |
| ENSMUSG00000086296 | NA            | NA        | grey60       |
| ENSMUSG00000106100 | NA            | NA        | lightcyan    |
| ENSMUSG00000019494 | Cops6         | 26893     | green        |
| ENSMUSG00000037151 | Lrrc20        | 216011    | brown        |
| ENSMUSG00000106105 | NA            | NA        | turquoise    |
| ENSMUSG00000106106 | NA            | NA        | yellow       |
| ENSMUSG00000037152 | NA            | NA        | midnightblue |

|                    |               |        |              |
|--------------------|---------------|--------|--------------|
| ENSMUSG00000047669 | Msl3l2        | 73390  | turquoise    |
| ENSMUSG00000022490 | Ppp1r1a       | 58200  | midnightblue |
| ENSMUSG00000033420 | Antxr1        | 69538  | blue         |
| ENSMUSG00000015766 | Eps8          | 13860  | yellow       |
| ENSMUSG00000033423 | Eri3          | 140546 | brown        |
| ENSMUSG00000040151 | NA            | NA     | blue         |
| ENSMUSG00000022498 | Txndc11       | 106200 | turquoise    |
| ENSMUSG00000050668 | Gpatch11      | 53951  | turquoise    |
| ENSMUSG00000033429 | Mcee          | 73724  | turquoise    |
| ENSMUSG00000040158 | Tax1bp3       | 76281  | turquoise    |
| ENSMUSG00000001521 | Tulp3         | 22158  | turquoise    |
| ENSMUSG00000001524 | Gtf2h4        | 14885  | blue         |
| ENSMUSG00000001525 | Tubb5         | 22154  | black        |
| ENSMUSG00000058360 | NA            | NA     | brown        |
| ENSMUSG00000068874 | Selenbp1      | 20341  | greenyellow  |
| ENSMUSG00000068876 | Cgn           | 70737  | turquoise    |
| ENSMUSG00000019731 | NA            | NA     | blue         |
| ENSMUSG00000102142 | NA            | NA     | blue         |
| ENSMUSG00000105928 | NA            | NA     | pink         |
| ENSMUSG00000102145 | NA            | NA     | blue         |
| ENSMUSG00000061360 | NA            | NA     | green        |
| ENSMUSG00000036977 | Anapc10       | 68999  | blue         |
| ENSMUSG00000047905 | NA            | NA     | turquoise    |
| ENSMUSG00000019738 | Polr2i        | 69920  | green        |
| ENSMUSG00000026466 | Tor1aip1      | 208263 | turquoise    |
| ENSMUSG00000044122 | Proca1        | 216974 | turquoise    |
| ENSMUSG00000047909 | NA            | NA     | yellow       |
| ENSMUSG00000026469 | Xpr1          | 19775  | yellow       |
| ENSMUSG00000082806 | NA            | NA     | tan          |
| ENSMUSG00000082809 | NA            | NA     | red          |
| ENSMUSG00000050900 | NA            | NA     | black        |
| ENSMUSG00000097230 | NA            | NA     | brown        |
| ENSMUSG00000105692 | NA            | NA     | brown        |
| ENSMUSG00000079575 | NA            | NA     | green        |
| ENSMUSG00000097234 | NA            | NA     | turquoise    |
| ENSMUSG00000058600 | Rpl30         | 19946  | midnightblue |
| ENSMUSG00000082570 | NA            | NA     | yellow       |
| ENSMUSG00000097239 | NA            | NA     | cyan         |
| ENSMUSG00000047675 | Rps8          | 20116  | black        |
| ENSMUSG00000047676 | NA            | NA     | black        |
| ENSMUSG00000058603 | NA            | NA     | black        |
| ENSMUSG00000047678 | Gpr82         | 319200 | greenyellow  |
| ENSMUSG00000082575 | NA            | NA     | tan          |
| ENSMUSG00000058607 | NA            | NA     | turquoise    |
| ENSMUSG00000037169 | Mycn          | 18109  | red          |
| ENSMUSG00000043940 | Wdfy3         | 72145  | brown        |
| ENSMUSG00000072066 | 6720489N17Rik | 211378 | blue         |
| ENSMUSG00000026701 | Prdx6         | 11758  | red          |
| ENSMUSG00000005262 | Ufd1l         | 22230  | green        |
| ENSMUSG00000033430 | Terf2ip       | 57321  | turquoise    |
| ENSMUSG00000015776 | Med22         | 20933  | black        |
| ENSMUSG00000026705 | Klhl20        | 226541 | blue         |
| ENSMUSG00000061601 | Pclo          | 26875  | yellow       |
| ENSMUSG00000033434 | Gtpbp6        | 107999 | turquoise    |

|                    |               |           |           |
|--------------------|---------------|-----------|-----------|
| ENSMUSG00000061603 | Akap6         | 238161    | turquoise |
| ENSMUSG00000005267 | Zfp287        | 170740    | turquoise |
| ENSMUSG00000026707 | Nsun6         | 74455     | yellow    |
| ENSMUSG00000026708 | Cenpl         | 70454     | magenta   |
| ENSMUSG00000033436 | Armcx2        | 67416     | green     |
| ENSMUSG00000026709 | Dars2         | 226539    | red       |
| ENSMUSG00000061607 | Mdc1          | 240087    | magenta   |
| ENSMUSG00000040167 | Iksz5         | 67143     | turquoise |
| ENSMUSG00000033439 | Trmt13        | 229780    | turquoise |
| ENSMUSG00000068882 | Ssb           | 20823     | black     |
| ENSMUSG00000036980 | Taf6          | 21343     | blue      |
| ENSMUSG00000069305 | Hist1h4n      | 319161    | turquoise |
| ENSMUSG00000105935 | NA            | NA        | turquoise |
| ENSMUSG00000069306 | Hist1h4m      | 100041230 | turquoise |
| ENSMUSG00000069307 | Hist1h2bq     | 665596    | turquoise |
| ENSMUSG00000105937 | NA            | NA        | turquoise |
| ENSMUSG00000026470 | NA            | NA        | blue      |
| ENSMUSG00000105939 | NA            | NA        | yellow    |
| ENSMUSG00000036985 | Zdhhc9        | 208884    | turquoise |
| ENSMUSG00000036986 | Pml           | 18854     | blue      |
| ENSMUSG00000037400 | Atp11b        | 76295     | turquoise |
| ENSMUSG00000026473 | Glul          | 14645     | purple    |
| ENSMUSG00000082810 | NA            | NA        | tan       |
| ENSMUSG00000061371 | NA            | NA        | green     |
| ENSMUSG00000026475 | Rgs16         | 19734     | blue      |
| ENSMUSG00000036989 | Trim3         | 55992     | yellow    |
| ENSMUSG00000061374 | Fiz1          | 23877     | green     |
| ENSMUSG00000026478 | Lamc1         | 226519    | brown     |
| ENSMUSG00000044134 | Fam109a       | 231717    | turquoise |
| ENSMUSG00000082816 | NA            | NA        | turquoise |
| ENSMUSG00000054648 | NA            | NA        | turquoise |
| ENSMUSG00000037408 | Cnnm4         | 94220     | brown     |
| ENSMUSG00000022742 | Cpox          | 12892     | turquoise |
| ENSMUSG00000050910 | Cdr2l         | 237988    | turquoise |
| ENSMUSG00000005501 | Usp40         | 227334    | turquoise |
| ENSMUSG00000022744 | Cldnd1        | 224250    | turquoise |
| ENSMUSG00000050912 | Tmem123       | 71929     | green     |
| ENSMUSG00000005505 | Kbtbd4        | 67136     | blue      |
| ENSMUSG00000005506 | Celf1         | 13046     | black     |
| ENSMUSG00000022748 | NA            | NA        | salmon    |
| ENSMUSG00000022749 | Tbc1d23       | 67581     | turquoise |
| ENSMUSG00000040407 | Akap9         | 100986    | blue      |
| ENSMUSG00000097245 | NA            | NA        | brown     |
| ENSMUSG00000097246 | NA            | NA        | blue      |
| ENSMUSG00000082580 | NA            | NA        | turquoise |
| ENSMUSG00000101970 | NA            | NA        | yellow    |
| ENSMUSG00000048100 | NA            | NA        | brown     |
| ENSMUSG00000037174 | Elf2          | 69257     | green     |
| ENSMUSG00000082585 | NA            | NA        | red       |
| ENSMUSG00000048106 | 4632415L05Rik | 70808     | turquoise |
| ENSMUSG00000082588 | NA            | NA        | yellow    |
| ENSMUSG00000083004 | NA            | NA        | blue      |
| ENSMUSG00000048109 | NA            | NA        | green     |
| ENSMUSG00000083007 | NA            | NA        | tan       |

|                    |               |        |              |
|--------------------|---------------|--------|--------------|
| ENSMUSG00000033444 | Specc1l       | 74392  | blue         |
| ENSMUSG00000061613 | U2af1         | 108121 | red          |
| ENSMUSG00000033446 | NA            | NA     | blue         |
| ENSMUSG00000026718 | Stam          | 20844  | blue         |
| ENSMUSG00000040174 | Alkbh3        | 69113  | turquoise    |
| ENSMUSG00000040177 | 2310057M21Rik | 68277  | turquoise    |
| ENSMUSG00000061619 | NA            | NA     | turquoise    |
| ENSMUSG00000058385 | Hist1h2bg     | 319181 | cyan         |
| ENSMUSG00000093282 | NA            | NA     | brown        |
| ENSMUSG00000036990 | Otud4         | 73945  | green        |
| ENSMUSG00000105944 | NA            | NA     | tan          |
| ENSMUSG00000058388 | Phtf1         | 18685  | blue         |
| ENSMUSG00000036992 | Nxt1          | 56488  | magenta      |
| ENSMUSG00000047921 | Trappc9       | 76510  | midnightblue |
| ENSMUSG00000026482 | Rgl1          | 19731  | turquoise    |
| ENSMUSG00000037410 | Tbc1d2b       | 67016  | brown        |
| ENSMUSG00000026484 | Rnf2          | 19821  | red          |
| ENSMUSG00000082820 | NA            | NA     | turquoise    |
| ENSMUSG00000009246 | Trpm5         | 56843  | turquoise    |
| ENSMUSG00000037415 | Ranbp10       | 74334  | turquoise    |
| ENSMUSG00000037416 | Dmxl1         | 240283 | yellow       |
| ENSMUSG00000026489 | Adck3         | 67426  | blue         |
| ENSMUSG00000044145 | 1810024B03Rik | 329509 | turquoise    |
| ENSMUSG00000082826 | NA            | NA     | tan          |
| ENSMUSG00000022750 | Klhl22        | 224023 | turquoise    |
| ENSMUSG00000044147 | Arf6          | 11845  | green        |
| ENSMUSG00000037419 | Endod1        | 71946  | green        |
| ENSMUSG00000022751 | Nit2          | 52633  | turquoise    |
| ENSMUSG00000044148 | 1810030O07Rik | 69155  | turquoise    |
| ENSMUSG00000005510 | Ndufs3        | 68349  | turquoise    |
| ENSMUSG00000022752 | Tomm70a       | 28185  | red          |
| ENSMUSG00000040410 | Fbxl4         | 269514 | brown        |
| ENSMUSG00000005514 | Por           | 18984  | brown        |
| ENSMUSG00000022757 | Tfg           | 21787  | black        |
| ENSMUSG00000040414 | Slc25a28      | 246696 | brown        |
| ENSMUSG00000040415 | Dtx3          | 80904  | brown        |
| ENSMUSG00000079593 | 4933416I08Rik | 71159  | turquoise    |
| ENSMUSG00000097253 | NA            | NA     | brown        |
| ENSMUSG00000069089 | Cdk7          | 12572  | turquoise    |
| ENSMUSG00000106133 | NA            | NA     | turquoise    |
| ENSMUSG00000047694 | Yipf6         | 77929  | turquoise    |
| ENSMUSG00000106135 | NA            | NA     | brown        |
| ENSMUSG00000058622 | NA            | NA     | yellow       |
| ENSMUSG00000058625 | NA            | NA     | red          |
| ENSMUSG00000072082 | Ccnf          | 12449  | magenta      |
| ENSMUSG00000015790 | Surf1         | 20930  | turquoise    |
| ENSMUSG00000082596 | NA            | NA     | turquoise    |
| ENSMUSG00000083011 | NA            | NA     | tan          |
| ENSMUSG00000083012 | Fam220a       | 67238  | green        |
| ENSMUSG00000048118 | Arid4a        | 238247 | turquoise    |
| ENSMUSG00000026721 | Rabgap1l      | 29809  | brown        |
| ENSMUSG00000043962 | Thrap3        | 230753 | blue         |
| ENSMUSG00000033450 | Tagap         | 72536  | turquoise    |
| ENSMUSG00000043964 | Orai3         | 269999 | blue         |

|                     |               |    |        |              |
|---------------------|---------------|----|--------|--------------|
| ENSMUSG00000040181  | Fmo1          |    | 14261  | yellow       |
| ENSMUSG00000033454  | NA            | NA |        | grey60       |
| ENSMUSG00000083019  | NA            | NA |        | yellow       |
| ENSMUSG00000026727  | Rsu1          |    | 20163  | turquoise    |
| ENSMUSG00000040183  | Ankrd6        |    | 140577 | green        |
| ENSMUSG00000043969  | Emx2          |    | 13797  | brown        |
| ENSMUSG00000050697  | Prkaa1        |    | 105787 | turquoise    |
| ENSMUSG00000026728  | Vim           |    | 22352  | midnightblue |
| ENSMUSG00000033458  | Fan1          |    | 330554 | pink         |
| ENSMUSG00000051113  | Fam71e1       |    | 75538  | turquoise    |
| ENSMUSG00000040188  | Scamp2        |    | 24044  | turquoise    |
| ENSMUSG00000040189  | Ccdc114       |    | 211535 | blue         |
| ENSMUSG00000051116  | NA            | NA |        | turquoise    |
| ENSMUSG00000001552  | Jup           |    | 16480  | yellow       |
| ENSMUSG00000001555  | Fkbp10        |    | 14230  | blue         |
| ENSMUSG00000058392  | Rrp1b         |    | 72462  | salmon       |
| ENSMUSG00000086567  | NA            | NA |        | black        |
| ENSMUSG00000019761  | Krt10         |    | 16661  | turquoise    |
| ENSMUSG00000026490  | Cdc42bpa      |    | 226751 | turquoise    |
| ENSMUSG00000019763  | NA            | NA |        | turquoise    |
| ENSMUSG00000026491  | Ahctf1        |    | 226747 | brown        |
| ENSMUSG00000026492  | Tfb2m         |    | 15278  | turquoise    |
| ENSMUSG000000102175 | NA            | NA |        | turquoise    |
| ENSMUSG000000061390 | NA            | NA |        | tan          |
| ENSMUSG00000047935  | Gm5607        |    | 434280 | black        |
| ENSMUSG00000044150  | A830080D01Ril |    | 382252 | green        |
| ENSMUSG00000026495  | NA            | NA |        | brown        |
| ENSMUSG00000026496  | Parp1         |    | 11545  | red          |
| ENSMUSG000000061393 | Acvr2b        |    | 11481  | blue         |
| ENSMUSG00000037426  | Depdc5        |    | 277854 | brown        |
| ENSMUSG00000026499  | Acbd3         |    | 170760 | turquoise    |
| ENSMUSG00000044155  | Lsm8          |    | 76522  | red          |
| ENSMUSG00000082836  | NA            | NA |        | pink         |
| ENSMUSG00000072324  | NA            | NA |        | pink         |
| ENSMUSG00000022760  | Thap7         |    | 69009  | turquoise    |
| ENSMUSG00000082838  | NA            | NA |        | turquoise    |
| ENSMUSG00000022761  | Lztr1         |    | 66863  | brown        |
| ENSMUSG00000022763  | Aifm3         |    | 72168  | purple       |
| ENSMUSG00000022765  | Snap29        |    | 67474  | turquoise    |
| ENSMUSG00000040423  | Rc3h1         |    | 381305 | turquoise    |
| ENSMUSG00000022769  | Sdf2l1        |    | 64136  | brown        |
| ENSMUSG00000040428  | Plekha4       |    | 69217  | cyan         |
| ENSMUSG00000040429  | Mterf1a       |    | 545725 | midnightblue |
| ENSMUSG00000069094  | Pde7a         |    | 18583  | turquoise    |
| ENSMUSG00000097263  | NA            | NA |        | turquoise    |
| ENSMUSG00000097265  | NA            | NA |        | yellow       |
| ENSMUSG00000037190  | Cyb561d2      |    | 56368  | turquoise    |
| ENSMUSG00000048120  | Entpd1        |    | 12495  | brown        |
| ENSMUSG00000037196  | Pacrg         |    | 69310  | blue         |
| ENSMUSG00000037197  | Rbm17         |    | 76938  | red          |
| ENSMUSG00000058638  | Zfp110        |    | 65020  | turquoise    |
| ENSMUSG00000083022  | NA            | NA |        | black        |
| ENSMUSG000000102411 | NA            | NA |        | yellow       |
| ENSMUSG00000033460  | Armxcx1       |    | 78248  | turquoise    |



|                    |               |           |           |
|--------------------|---------------|-----------|-----------|
| ENSMUSG00000083027 | NA            | NA        | cyan      |
| ENSMUSG00000026737 | Pip4k2a       | 18718     | yellow    |
| ENSMUSG00000040195 | 1700012D01Rik | 72243     | magenta   |
| ENSMUSG00000026739 | Bmi1          | 12151     | brown     |
| ENSMUSG00000033467 | Crlf2         | 57914     | turquoise |
| ENSMUSG00000005299 | NA            | NA        | brown     |
| ENSMUSG00000001569 | NA            | NA        | blue      |
| ENSMUSG00000105962 | NA            | NA        | turquoise |
| ENSMUSG00000105965 | NA            | NA        | yellow    |
| ENSMUSG00000019773 | Fbxo5         | 67141     | magenta   |
| ENSMUSG00000097507 | NA            | NA        | turquoise |
| ENSMUSG00000019774 | Mtrf1l        | 108853    | pink      |
| ENSMUSG00000019775 | Rgs17         | 56533     | turquoise |
| ENSMUSG00000019777 | Hdac2         | 15182     | red       |
| ENSMUSG00000047945 | Marcks1       | 17357     | purple    |
| ENSMUSG00000037434 | Slc30a1       | 22782     | turquoise |
| ENSMUSG00000054676 | NA            | NA        | turquoise |
| ENSMUSG00000082844 | NA            | NA        | turquoise |
| ENSMUSG00000044164 | Rnf182        | 328234    | turquoise |
| ENSMUSG00000037438 | NA            | NA        | turquoise |
| ENSMUSG00000022770 | Dlg1          | 13383     | turquoise |
| ENSMUSG00000044167 | NA            | NA        | turquoise |
| ENSMUSG00000022771 | Ppil2         | 66053     | blue      |
| ENSMUSG00000022772 | NA            | NA        | turquoise |
| ENSMUSG00000022773 | Ypel1         | 106369    | black     |
| ENSMUSG00000022774 | Ncbp2         | 68092     | green     |
| ENSMUSG00000033701 | Acbd6         | 72482     | red       |
| ENSMUSG00000005533 | NA            | NA        | brown     |
| ENSMUSG00000040430 | Pitpnc1       | 71795     | green     |
| ENSMUSG00000005534 | Insr          | 16337     | turquoise |
| ENSMUSG00000033703 | Fuk           | 234730    | blue      |
| ENSMUSG00000050945 | Zfp438        | 240186    | pink      |
| ENSMUSG00000040433 | Zbtb38        | 245007    | blue      |
| ENSMUSG00000033705 | Stard9        | 668880    | turquoise |
| ENSMUSG00000022779 | Top3b         | 21976     | turquoise |
| ENSMUSG00000033706 | Smyd5         | 232187    | lightcyan |
| ENSMUSG00000050947 | Amigo1        | 229715    | turquoise |
| ENSMUSG00000033707 | C030006K11Rik | 223665    | turquoise |
| ENSMUSG00000040435 | Ppp1r15a      | 17872     | green     |
| ENSMUSG00000001802 | Lrp3          | 435965    | brown     |
| ENSMUSG00000097274 | NA            | NA        | turquoise |
| ENSMUSG00000097277 | 2900076A07Rik | 100504421 | blue      |
| ENSMUSG00000086810 | NA            | NA        | turquoise |
| ENSMUSG00000086815 | 3110082J24Rik | 433868    | yellow    |
| ENSMUSG00000026740 | Dnajc1        | 13418     | yellow    |
| ENSMUSG00000083033 | NA            | NA        | tan       |
| ENSMUSG00000093548 | NA            | NA        | turquoise |
| ENSMUSG00000026743 | Mllt10        | 17354     | blue      |
| ENSMUSG00000102426 | NA            | NA        | turquoise |
| ENSMUSG00000102428 | Pcdhga12      | 93724     | turquoise |
| ENSMUSG00000043987 | Cep164        | 214552    | turquoise |
| ENSMUSG00000033475 | NA            | NA        | yellow    |
| ENSMUSG00000026749 | Nek6          | 59126     | blue      |
| ENSMUSG00000033478 | Fam160b1      | 226252    | blue      |

|                    |          |        |             |
|--------------------|----------|--------|-------------|
| ENSMUSG00000051133 | NA       | NA     | turquoise   |
| ENSMUSG00000044408 | Sptssa   | 104725 | blue        |
| ENSMUSG00000001576 | Ergic1   | 67458  | green       |
| ENSMUSG00000086583 | NA       | NA     | black       |
| ENSMUSG00000086587 | NA       | NA     | blue        |
| ENSMUSG00000019782 | Rwdd1    | 66521  | blue        |
| ENSMUSG00000097515 | NA       | NA     | turquoise   |
| ENSMUSG00000097518 | NA       | NA     | yellow      |
| ENSMUSG00000087006 | Gm13889  | 620695 | blue        |
| ENSMUSG00000082852 | NA       | NA     | yellow      |
| ENSMUSG00000037443 | Cep85    | 70012  | red         |
| ENSMUSG00000037447 | Arid5a   | 214855 | yellow      |
| ENSMUSG00000044176 | Spink10  | 328971 | turquoise   |
| ENSMUSG00000090000 | Ier3ip1  | 66191  | brown       |
| ENSMUSG00000022781 | Pak2     | 224105 | black       |
| ENSMUSG00000090002 | NA       | NA     | yellow      |
| ENSMUSG00000033712 | Ccar2    | 219158 | blue        |
| ENSMUSG00000050953 | Gja1     | 14609  | red         |
| ENSMUSG00000033713 | Foxn3    | 71375  | turquoise   |
| ENSMUSG00000050954 | Zfp169   | 67911  | blue        |
| ENSMUSG00000022787 | Wdr53    | 68980  | blue        |
| ENSMUSG00000022788 | Fgd4     | 224014 | yellow      |
| ENSMUSG00000022789 | Dnm1l    | 74006  | turquoise   |
| ENSMUSG00000040446 | Rprd1a   | 225283 | turquoise   |
| ENSMUSG00000023206 | Il15ra   | 16169  | turquoise   |
| ENSMUSG00000097280 | NA       | NA     | purple      |
| ENSMUSG00000097287 | NA       | NA     | turquoise   |
| ENSMUSG00000058655 | Eif4b    | 75705  | red         |
| ENSMUSG00000048142 | Nat8l    | 269642 | greenyellow |
| ENSMUSG00000086826 | NA       | NA     | lightcyan   |
| ENSMUSG00000043991 | NA       | NA     | turquoise   |
| ENSMUSG00000026750 | Psmb7    | 19177  | green       |
| ENSMUSG00000083043 | NA       | NA     | turquoise   |
| ENSMUSG00000048148 | Nwd1     | 319555 | purple      |
| ENSMUSG00000083044 | NA       | NA     | greenyellow |
| ENSMUSG00000043993 | NA       | NA     | yellow      |
| ENSMUSG00000054920 | Klhl5    | 71778  | turquoise   |
| ENSMUSG00000026753 | Ppp6c    | 67857  | blue        |
| ENSMUSG00000061650 | NA       | NA     | green       |
| ENSMUSG00000026754 | Golga1   | 76899  | turquoise   |
| ENSMUSG00000026755 | Arpc5l   | 74192  | green       |
| ENSMUSG00000043998 | Mgat2    | 217664 | brown       |
| ENSMUSG00000033487 | Fndc3a   | 319448 | yellow      |
| ENSMUSG00000097520 | NA       | NA     | yellow      |
| ENSMUSG00000019790 | Stxbp5   | 78808  | turquoise   |
| ENSMUSG00000105985 | NA       | NA     | blue        |
| ENSMUSG00000019791 | NA       | NA     | blue        |
| ENSMUSG00000019792 | Trmt11   | 73681  | turquoise   |
| ENSMUSG00000105987 | Ai506816 | 433855 | red         |
| ENSMUSG00000019794 | Katna1   | 23924  | blue        |
| ENSMUSG00000019795 | NA       | NA     | blue        |
| ENSMUSG00000019796 | Lrp11    | 237253 | blue        |
| ENSMUSG00000082860 | NA       | NA     | turquoise   |
| ENSMUSG00000082861 | NA       | NA     | turquoise   |

|                    |               |           |           |
|--------------------|---------------|-----------|-----------|
| ENSMUSG00000054693 | Adam10        | 11487     | blue      |
| ENSMUSG00000019797 | 1700021F05Rik | 67851     | blue      |
| ENSMUSG00000047965 | NA            | NA        | black     |
| ENSMUSG00000037455 | Slc18b1       | 76306     | turquoise |
| ENSMUSG00000037458 | Azin1         | 54375     | blue      |
| ENSMUSG00000082867 | NA            | NA        | blue      |
| ENSMUSG00000022790 | Igsf11        | 207683    | blue      |
| ENSMUSG00000022791 | Tnk2          | 51789     | turquoise |
| ENSMUSG00000022792 | Yars2         | 70120     | brown     |
| ENSMUSG00000055116 | Arntl         | 11865     | yellow    |
| ENSMUSG00000022793 | B4galt4       | 56375     | turquoise |
| ENSMUSG00000033720 | Sfxn5         | 94282     | red       |
| ENSMUSG00000033722 | BC034090      | 207792    | grey60    |
| ENSMUSG00000090015 | Gm15446       | 100642166 | cyan      |
| ENSMUSG00000040451 | Sgms1         | 208449    | yellow    |
| ENSMUSG00000022797 | Tfrc          | 22042     | turquoise |
| ENSMUSG00000050965 | Prkca         | 18750     | turquoise |
| ENSMUSG00000022799 | Arhgap31      | 12549     | turquoise |
| ENSMUSG00000040455 | Usp45         | 77593     | pink      |
| ENSMUSG00000033728 | Lrrc14        | 223664    | turquoise |
| ENSMUSG00000097290 | 1300002E11Rik | 100043489 | turquoise |
| ENSMUSG00000040459 | Arglu1        | 234023    | turquoise |
| ENSMUSG00000097292 | A230107N01Rik | 320919    | yellow    |
| ENSMUSG00000097296 | NA            | NA        | yellow    |
| ENSMUSG00000001829 | Clpb          | 20480     | turquoise |
| ENSMUSG00000048154 | Kmt2d         | 381022    | blue      |
| ENSMUSG00000093565 | Rab26os       | 75614     | lightcyan |
| ENSMUSG00000102442 | NA            | NA        | yellow    |
| ENSMUSG00000026761 | Orc4          | 26428     | turquoise |
| ENSMUSG00000083055 | NA            | NA        | turquoise |
| ENSMUSG00000054931 | Zkscan4       | 544922    | turquoise |
| ENSMUSG00000026764 | Kif5c         | 16574     | grey60    |
| ENSMUSG00000016252 | Atp5e         | 67126     | green     |
| ENSMUSG00000016253 | Nelfcd        | 57314     | green     |
| ENSMUSG00000026766 | Mmadhc        | 109129    | brown     |
| ENSMUSG00000026767 | Fam188a       | 66960     | turquoise |
| ENSMUSG00000044424 | LOC102638448  | 102638448 | black     |
| ENSMUSG00000061665 | Cd2ap         | 12488     | turquoise |
| ENSMUSG00000016256 | Ctsz          | 64138     | yellow    |
| ENSMUSG00000061666 | Gdpd1         | 66569     | blue      |
| ENSMUSG00000016257 | Slmo2         | 66390     | green     |
| ENSMUSG00000033499 | Larp4b        | 217980    | green     |
| ENSMUSG00000051154 | Commd3        | 12238     | brown     |
| ENSMUSG00000002010 | Idh3g         | 15929     | turquoise |
| ENSMUSG00000002014 | Ssr4          | 20832     | blue      |
| ENSMUSG00000002015 | Bcap31        | 27061     | turquoise |
| ENSMUSG00000002017 | Fam98a        | 72722     | red       |
| ENSMUSG00000097530 | NA            | NA        | blue      |
| ENSMUSG00000097532 | NA            | NA        | cyan      |
| ENSMUSG00000097536 | NA            | NA        | yellow    |
| ENSMUSG00000009291 | Pttg1ip       | 108705    | blue      |
| ENSMUSG00000082870 | NA            | NA        | pink      |
| ENSMUSG00000009293 | Ube2g2        | 22213     | green     |
| ENSMUSG00000037461 | NA            | NA        | black     |

|                    |               |           |             |
|--------------------|---------------|-----------|-------------|
| ENSMUSG00000082872 | NA            | NA        | lightcyan   |
| ENSMUSG00000082874 | NA            | NA        | lightcyan   |
| ENSMUSG00000106419 | NA            | NA        | pink        |
| ENSMUSG00000058905 | Gm10051       | 100039731 | blue        |
| ENSMUSG00000037466 | NA            | NA        | magenta     |
| ENSMUSG00000093803 | NA            | NA        | turquoise   |
| ENSMUSG00000082876 | NA            | NA        | pink        |
| ENSMUSG00000082877 | NA            | NA        | turquoise   |
| ENSMUSG00000044197 | Gpr146        | 80290     | purple      |
| ENSMUSG00000082878 | NA            | NA        | blue        |
| ENSMUSG00000090021 | NA            | NA        | turquoise   |
| ENSMUSG00000055128 | Cgrrf1        | 68755     | purple      |
| ENSMUSG00000033732 | Sf3b3         | 101943    | red         |
| ENSMUSG00000040462 | Os9           | 216440    | brown       |
| ENSMUSG00000005566 | Trim28        | 21849     | red         |
| ENSMUSG00000040463 | Mybbp1a       | 18432     | blue        |
| ENSMUSG00000033735 | Spr           | 20751     | turquoise   |
| ENSMUSG00000012296 | Tjap1         | 74094     | red         |
| ENSMUSG00000061904 | Slc25a3       | 18674     | brown       |
| ENSMUSG00000040464 | Gtpbp10       | 207704    | blue        |
| ENSMUSG00000040466 | Blvrb         | 233016    | yellow      |
| ENSMUSG00000033739 | Fkbpl         | 56299     | brown       |
| ENSMUSG00000001833 | 6-Sep         | 235072    | brown       |
| ENSMUSG00000106181 | NA            | NA        | yellow      |
| ENSMUSG00000058672 | Tubb2a        | 22151     | greenyellow |
| ENSMUSG00000086841 | 2410006H16Rik | 69221     | black       |
| ENSMUSG00000086842 | NA            | NA        | cyan        |
| ENSMUSG00000106189 | NA            | NA        | yellow      |
| ENSMUSG00000048164 | NA            | NA        | greenyellow |
| ENSMUSG00000083061 | NA            | NA        | blue        |
| ENSMUSG00000086846 | NA            | NA        | turquoise   |
| ENSMUSG00000026771 | Spopl         | 76857     | turquoise   |
| ENSMUSG00000083064 | NA            | NA        | turquoise   |
| ENSMUSG00000093577 | NA            | NA        | yellow      |
| ENSMUSG00000026773 | Pfkfb3        | 170768    | turquoise   |
| ENSMUSG00000054942 | Fam73a        | 215708    | blue        |
| ENSMUSG00000026775 | Yme1l1        | 27377     | turquoise   |
| ENSMUSG00000009535 | Rnmt          | 67897     | black       |
| ENSMUSG00000037703 | Lzts3         | 241638    | cyan        |
| ENSMUSG00000054945 | Gm9958        | 791294    | yellow      |
| ENSMUSG00000037706 | Cd81          | 12520     | purple      |
| ENSMUSG00000026779 | Mastl         | 67121     | salmon      |
| ENSMUSG00000044434 | NA            | NA        | purple      |
| ENSMUSG00000037709 | NA            | NA        | turquoise   |
| ENSMUSG00000051166 | Eml5          | 319670    | turquoise   |
| ENSMUSG00000005802 | Slc30a4       | 22785     | yellow      |
| ENSMUSG00000005804 | Bloc1s6       | 18457     | green       |
| ENSMUSG00000040701 | Ap1g2         | 11766     | turquoise   |
| ENSMUSG00000012535 | Tnpo3         | 320938    | green       |
| ENSMUSG00000079884 | NA            | NA        | brown       |
| ENSMUSG00000002028 | Kmt2a         | 214162    | turquoise   |
| ENSMUSG00000069376 | NA            | NA        | greenyellow |
| ENSMUSG00000079889 | NA            | NA        | turquoise   |
| ENSMUSG00000106421 | NA            | NA        | turquoise   |

|                    |          |        |              |
|--------------------|----------|--------|--------------|
| ENSMUSG00000069379 | NA       | NA     | brown        |
| ENSMUSG00000037470 | Uggt1    | 320011 | turquoise    |
| ENSMUSG00000037474 | Dtl      | 76843  | salmon       |
| ENSMUSG00000037475 | Thoc2    | 331401 | red          |
| ENSMUSG00000048402 | Gli2     | 14633  | brown        |
| ENSMUSG00000082884 | NA       | NA     | yellow       |
| ENSMUSG00000047989 | Ino80c   | 225280 | turquoise    |
| ENSMUSG00000048406 | NA       | NA     | turquoise    |
| ENSMUSG00000093816 | NA       | NA     | lightcyan    |
| ENSMUSG00000005575 | Ube2m    | 22192  | brown        |
| ENSMUSG00000040472 | Rabggt   | 56187  | turquoise    |
| ENSMUSG00000016503 | Gtf3a    | 66596  | red          |
| ENSMUSG00000023232 | Serinc2  | 230779 | blue         |
| ENSMUSG00000023235 | Ccl25    | 20300  | yellow       |
| ENSMUSG00000050989 | Sepn1    | 74777  | turquoise    |
| ENSMUSG00000051403 | Ppp1r37  | 232947 | turquoise    |
| ENSMUSG00000023236 | Scg5     | 20394  | turquoise    |
| ENSMUSG00000040479 | Dgkz     | 104418 | blue         |
| ENSMUSG00000001844 | Zdhc4    | 72881  | turquoise    |
| ENSMUSG00000106190 | NA       | NA     | turquoise    |
| ENSMUSG00000001847 | Rac1     | 19353  | blue         |
| ENSMUSG00000048170 | Mcmbp    | 210711 | green        |
| ENSMUSG00000048175 | Asb8     | 78541  | yellow       |
| ENSMUSG00000083072 | NA       | NA     | turquoise    |
| ENSMUSG00000086859 | Snhg20   | 76972  | blue         |
| ENSMUSG00000026781 | Acbd5    | 74159  | turquoise    |
| ENSMUSG00000102463 | NA       | NA     | turquoise    |
| ENSMUSG00000026782 | Abi2     | 329165 | blue         |
| ENSMUSG00000093589 | NA       | NA     | yellow       |
| ENSMUSG00000037710 | Cisd1    | 52637  | turquoise    |
| ENSMUSG00000026784 | Pdss1    | 56075  | lightcyan    |
| ENSMUSG00000037712 | Fermt2   | 218952 | yellow       |
| ENSMUSG00000027200 | Sema6d   | 214968 | purple       |
| ENSMUSG00000044442 | N6amt1   | 67768  | turquoise    |
| ENSMUSG00000026787 | Gad2     | 14417  | brown        |
| ENSMUSG00000027201 | Myef2    | 17876  | red          |
| ENSMUSG00000061684 | NA       | NA     | tan          |
| ENSMUSG00000026788 | Zbtb43   | 71834  | brown        |
| ENSMUSG00000027203 | Dut      | 110074 | magenta      |
| ENSMUSG00000009549 | Srp14    | 20813  | midnightblue |
| ENSMUSG00000062101 | Zfp119b  | 240120 | turquoise    |
| ENSMUSG00000044447 | Dock5    | 68813  | brown        |
| ENSMUSG00000027206 | Cops2    | 12848  | turquoise    |
| ENSMUSG00000027207 | Galk2    | 69976  | turquoise    |
| ENSMUSG00000061689 | Dlgap4   | 228836 | purple       |
| ENSMUSG00000051177 | Plcb1    | 18795  | yellow       |
| ENSMUSG00000005813 | Metap1   | 75624  | green        |
| ENSMUSG00000040711 | Sh3pxd2b | 268396 | yellow       |
| ENSMUSG00000040712 | Camta2   | 216874 | yellow       |
| ENSMUSG00000002031 | Ift46    | 76568  | blue         |
| ENSMUSG00000002032 | Tmem25   | 71687  | brown        |
| ENSMUSG00000040713 | Creg1    | 433375 | turquoise    |
| ENSMUSG00000030201 | Lrp6     | 16974  | turquoise    |
| ENSMUSG00000040717 | Il17rd   | 171463 | turquoise    |

|                    |         |           |           |
|--------------------|---------|-----------|-----------|
| ENSMUSG00000030204 | Ddx47   | 67755     | green     |
| ENSMUSG00000030207 | Fam234b | 74525     | turquoise |
| ENSMUSG00000030209 | Grin2b  | 14812     | turquoise |
| ENSMUSG00000097554 | NA      | NA        | red       |
| ENSMUSG00000047992 | Fam69c  | 240479    | turquoise |
| ENSMUSG00000058922 | NA      | NA        | red       |
| ENSMUSG00000082893 | NA      | NA        | turquoise |
| ENSMUSG00000072381 | NA      | NA        | turquoise |
| ENSMUSG00000037486 | Asxl2   | 75302     | green     |
| ENSMUSG00000082895 | NA      | NA        | black     |
| ENSMUSG00000058927 | NA      | NA        | brown     |
| ENSMUSG00000037487 | Ubr5    | 70790     | turquoise |
| ENSMUSG00000082896 | NA      | NA        | black     |
| ENSMUSG00000083311 | NA      | NA        | turquoise |
| ENSMUSG00000093826 | NA      | NA        | turquoise |
| ENSMUSG00000072387 | NA      | NA        | turquoise |
| ENSMUSG00000005583 | Mef2c   | 17260     | turquoise |
| ENSMUSG00000033751 | NA      | NA        | turquoise |
| ENSMUSG00000016510 | Mtif3   | 76366     | grey60    |
| ENSMUSG00000040481 | Bptf    | 207165    | turquoise |
| ENSMUSG00000040482 | Dxo     | 112403    | turquoise |
| ENSMUSG00000051413 | Plagl2  | 54711     | turquoise |
| ENSMUSG00000006005 | Tpr     | 108989    | green     |
| ENSMUSG00000001855 | Nup214  | 227720    | grey60    |
| ENSMUSG00000058690 | Ccser2  | 72972     | turquoise |
| ENSMUSG00000069622 | NA      | NA        | turquoise |
| ENSMUSG00000048185 | NA      | NA        | turquoise |
| ENSMUSG00000048186 | Bend7   | 209645    | turquoise |
| ENSMUSG00000026790 | Odf2    | 18286     | blue      |
| ENSMUSG00000048188 | NA      | NA        | turquoise |
| ENSMUSG00000026791 | Slc2a8  | 56017     | yellow    |
| ENSMUSG00000026792 | Lrsam1  | 227738    | yellow    |
| ENSMUSG00000083086 | NA      | NA        | tan       |
| ENSMUSG00000093599 | Mir5620 | 100885832 | brown     |
| ENSMUSG00000037720 | Tmem33  | 67878     | yellow    |
| ENSMUSG00000083087 | NA      | NA        | pink      |
| ENSMUSG00000037722 | Gnpnat1 | 54342     | green     |
| ENSMUSG00000059119 | Nap114  | 17955     | green     |
| ENSMUSG00000027210 | Meis2   | 17536     | blue      |
| ENSMUSG00000102478 | NA      | NA        | turquoise |
| ENSMUSG00000009555 | NA      | NA        | turquoise |
| ENSMUSG00000026797 | Stxbp1  | 20910     | turquoise |
| ENSMUSG00000044452 | Zfp507  | 668501    | brown     |
| ENSMUSG00000094017 | NA      | NA        | magenta   |
| ENSMUSG00000037725 | Ckap2   | 80986     | magenta   |
| ENSMUSG00000026798 | Coq4    | 227683    | turquoise |
| ENSMUSG00000026799 | Med27   | 68975     | black     |
| ENSMUSG00000072623 | Zfp9    | 22750     | turquoise |
| ENSMUSG00000062110 | Scfd2   | 212986    | pink      |
| ENSMUSG00000051184 | Zfp524  | 66056     | turquoise |
| ENSMUSG00000051185 | Fam174a | 67698     | turquoise |
| ENSMUSG00000027217 | Tspan18 | 241556    | lightcyan |
| ENSMUSG00000062115 | Rai1    | 19377     | yellow    |
| ENSMUSG00000005823 | Gpr108  | 78308     | turquoise |

|                    |               |        |              |
|--------------------|---------------|--------|--------------|
| ENSMUSG00000040720 | 1110037F02Rik | 66185  | brown        |
| ENSMUSG00000040721 | Zfhx2         | 239102 | yellow       |
| ENSMUSG00000040722 | Scamp5        | 56807  | turquoise    |
| ENSMUSG00000002043 | Trappc6a      | 67091  | turquoise    |
| ENSMUSG00000040725 | Hnrnpul1      | 232989 | green        |
| ENSMUSG00000030213 | Atf7ip        | 54343  | turquoise    |
| ENSMUSG00000030216 | Wbp11         | 60321  | red          |
| ENSMUSG00000037493 | NA            | NA     | turquoise    |
| ENSMUSG00000048424 | NA            | NA     | turquoise    |
| ENSMUSG00000037499 | Nenf          | 66208  | turquoise    |
| ENSMUSG00000102712 | NA            | NA     | turquoise    |
| ENSMUSG00000102713 | NA            | NA     | turquoise    |
| ENSMUSG00000033760 | Rbm4b         | 66704  | blue         |
| ENSMUSG00000048429 | 1810026J23Rik | 69773  | green        |
| ENSMUSG00000083325 | NA            | NA     | turquoise    |
| ENSMUSG00000016520 | Lnx2          | 140887 | turquoise    |
| ENSMUSG00000083326 | NA            | NA     | tan          |
| ENSMUSG00000033762 | Recql4        | 79456  | brown        |
| ENSMUSG00000083327 | NA            | NA     | green        |
| ENSMUSG00000033763 | Mtss1l        | 244654 | turquoise    |
| ENSMUSG00000083328 | NA            | NA     | tan          |
| ENSMUSG00000006010 | BC003331      | 226499 | turquoise    |
| ENSMUSG00000102719 | NA            | NA     | brown        |
| ENSMUSG00000016526 | NA            | NA     | turquoise    |
| ENSMUSG00000033767 | D930015E06Rik | 229473 | green        |
| ENSMUSG00000033768 | Nrxn2         | 18190  | blue         |
| ENSMUSG00000033769 | Exoc6b        | 75914  | turquoise    |
| ENSMUSG00000051427 | Ccdc157       | 216516 | turquoise    |
| ENSMUSG00000023259 | Slc26a6       | 171429 | yellow       |
| ENSMUSG00000006019 | Dhx34         | 71723  | turquoise    |
| ENSMUSG00000001864 | Aif1l         | 108897 | blue         |
| ENSMUSG00000069631 | Strada        | 72149  | brown        |
| ENSMUSG00000048191 | Muc6          | 353328 | turquoise    |
| ENSMUSG00000069633 | Pex11g        | 69129  | brown        |
| ENSMUSG00000097803 | NA            | NA     | pink         |
| ENSMUSG00000086877 | NA            | NA     | turquoise    |
| ENSMUSG00000037730 | Mynn          | 80732  | cyan         |
| ENSMUSG00000083097 | NA            | NA     | brown        |
| ENSMUSG00000009563 | Tor2a         | 30933  | brown        |
| ENSMUSG00000044461 | Shisa2        | 219134 | yellow       |
| ENSMUSG00000027221 | Chst1         | 76969  | purple       |
| ENSMUSG00000009566 | Fpgs          | 14287  | blue         |
| ENSMUSG00000027222 | Pex16         | 18633  | yellow       |
| ENSMUSG00000027223 | Mapk8ip1      | 19099  | green        |
| ENSMUSG00000037736 | Limch1        | 77569  | yellow       |
| ENSMUSG00000009569 | Mkl2          | 239719 | turquoise    |
| ENSMUSG00000044465 | Fam160a2      | 74349  | turquoise    |
| ENSMUSG00000027227 | Sord          | 20322  | salmon       |
| ENSMUSG00000044469 | Tnfaip8l1     | 66443  | magenta      |
| ENSMUSG00000062127 | Cttnbp2nl     | 80281  | turquoise    |
| ENSMUSG00000040731 | Eif4h         | 22384  | midnightblue |
| ENSMUSG00000002052 | Supt6         | 20926  | green        |
| ENSMUSG00000002055 | Spag5         | 54141  | magenta      |
| ENSMUSG00000030224 | Strap         | 20901  | black        |

|                    |              |        |           |
|--------------------|--------------|--------|-----------|
| ENSMUSG00000030225 | Dera         | 232449 | turquoise |
| ENSMUSG00000040738 | Ints8        | 72656  | turquoise |
| ENSMUSG00000002058 | Unc119       | 22248  | turquoise |
| ENSMUSG00000030226 | NA           | NA     | blue      |
| ENSMUSG00000002059 | Rab34        | 19376  | turquoise |
| ENSMUSG00000097571 | Jpx          | 70252  | turquoise |
| ENSMUSG00000097574 | C920006O11Ri | 320295 | turquoise |
| ENSMUSG00000097576 | NA           | NA     | turquoise |
| ENSMUSG00000097577 | NA           | NA     | turquoise |
| ENSMUSG00000097578 | NA           | NA     | turquoise |
| ENSMUSG00000106454 | NA           | NA     | grey60    |
| ENSMUSG00000048439 | Nupl2        | 231042 | green     |
| ENSMUSG00000093849 | NA           | NA     | lightcyan |
| ENSMUSG00000083337 | NA           | NA     | black     |
| ENSMUSG00000033773 | Rpap2        | 231571 | brown     |
| ENSMUSG00000044700 | Tmem201      | 230917 | brown     |
| ENSMUSG00000023262 | Acy1         | 109652 | turquoise |
| ENSMUSG00000006021 | Kptn         | 70394  | turquoise |
| ENSMUSG00000016534 | Lamp2        | 16784  | yellow    |
| ENSMUSG00000006024 | Napa         | 108124 | brown     |
| ENSMUSG00000023266 | Frs3         | 107971 | turquoise |
| ENSMUSG00000044708 | Kcnj10       | 16513  | turquoise |
| ENSMUSG00000044709 | Gemin7       | 69731  | green     |
| ENSMUSG00000086882 | NA           | NA     | cyan      |
| ENSMUSG00000097811 | NA           | NA     | turquoise |
| ENSMUSG00000097815 | NA           | NA     | turquoise |
| ENSMUSG00000102493 | NA           | NA     | black     |
| ENSMUSG00000037740 | NA           | NA     | blue      |
| ENSMUSG00000102496 | NA           | NA     | blue      |
| ENSMUSG00000037742 | Eef1a1       | 13627  | black     |
| ENSMUSG00000087307 | NA           | NA     | turquoise |
| ENSMUSG00000009575 | Cbx5         | 12419  | green     |
| ENSMUSG00000044471 | Lncpint      | 232685 | turquoise |
| ENSMUSG00000072640 | NA           | NA     | brown     |
| ENSMUSG00000055401 | Fbxo6        | 50762  | turquoise |
| ENSMUSG00000037747 | Phyhipl      | 70911  | purple    |
| ENSMUSG00000044475 | Ascc1        | 69090  | turquoise |
| ENSMUSG00000044477 | Zfand3       | 21769  | blue      |
| ENSMUSG00000027236 | NA           | NA     | brown     |
| ENSMUSG00000027239 | Mdk          | 17242  | green     |
| ENSMUSG00000090305 | NA           | NA     | pink      |
| ENSMUSG00000005846 | Rsl1d1       | 66409  | yellow    |
| ENSMUSG00000030231 | NA           | NA     | turquoise |
| ENSMUSG00000002064 | Sdf2         | 20316  | blue      |
| ENSMUSG00000030232 | Aebp2        | 11569  | blue      |
| ENSMUSG00000040746 | Rnf167       | 70510  | turquoise |
| ENSMUSG00000023505 | Cdca3        | 14793  | magenta   |
| ENSMUSG00000030235 | Slco1c1      | 58807  | purple    |
| ENSMUSG00000040749 | Siah1b       | 20438  | salmon    |
| ENSMUSG00000097583 | NA           | NA     | yellow    |
| ENSMUSG00000087072 | NA           | NA     | brown     |
| ENSMUSG00000097585 | NA           | NA     | turquoise |
| ENSMUSG00000098002 | NA           | NA     | turquoise |
| ENSMUSG00000097589 | Dleu2        | 668253 | brown     |



|                    |               |        |              |
|--------------------|---------------|--------|--------------|
| ENSMUSG00000048440 | Cyp4f16       | 70101  | pink         |
| ENSMUSG00000058953 | NA            | NA     | turquoise    |
| ENSMUSG00000087079 | NA            | NA     | blue         |
| ENSMUSG00000098006 | NA            | NA     | greenyellow  |
| ENSMUSG00000098009 | NA            | NA     | turquoise    |
| ENSMUSG00000048445 | Ccdc57        | 71276  | turquoise    |
| ENSMUSG00000083344 | NA            | NA     | lightcyan    |
| ENSMUSG00000033781 | Asb13         | 142688 | yellow       |
| ENSMUSG00000083346 | NA            | NA     | turquoise    |
| ENSMUSG00000061950 | Ppp4r1        | 70351  | red          |
| ENSMUSG00000016541 | Atxn10        | 54138  | midnightblue |
| ENSMUSG00000090077 | Lime1         | 72699  | cyan         |
| ENSMUSG00000023272 | Creld2        | 76737  | yellow       |
| ENSMUSG00000044712 | Slc38a6       | 625098 | turquoise    |
| ENSMUSG00000044715 | Gskip         | 66787  | blue         |
| ENSMUSG00000034203 | Chchd4        | 72170  | blue         |
| ENSMUSG00000044716 | Dok7          | 231134 | turquoise    |
| ENSMUSG00000023277 | Twf2          | 23999  | blue         |
| ENSMUSG00000002307 | Daxx          | 13163  | blue         |
| ENSMUSG00000002308 | Cd320         | 54219  | turquoise    |
| ENSMUSG00000097820 | E530011L22Rik | 320301 | midnightblue |
| ENSMUSG00000059142 | Zfp945        | 240041 | blue         |
| ENSMUSG00000097827 | NA            | NA     | yellow       |
| ENSMUSG00000059146 | Ntrk3         | 18213  | turquoise    |
| ENSMUSG00000037750 | Fam222b       | 216971 | yellow       |
| ENSMUSG00000059149 | Mfsd4         | 213006 | turquoise    |
| ENSMUSG00000009585 | Apobec3       | 80287  | turquoise    |
| ENSMUSG00000027242 | Wdr76         | 241627 | salmon       |
| ENSMUSG00000027243 | Harbi1        | 241547 | blue         |
| ENSMUSG00000027244 | Atg13         | 51897  | brown        |
| ENSMUSG00000072653 | Zfp783        | 232785 | turquoise    |
| ENSMUSG00000027245 | NA            | NA     | turquoise    |
| ENSMUSG00000027247 | Arhgap1       | 228359 | brown        |
| ENSMUSG00000027248 | Pdia3         | 14827  | turquoise    |
| ENSMUSG00000090319 | NA            | NA     | pink         |
| ENSMUSG00000030243 | Recql         | 19691  | turquoise    |
| ENSMUSG00000030245 | Golt1b        | 66964  | blue         |
| ENSMUSG00000040759 | Cmtm5         | 67272  | purple       |
| ENSMUSG00000030246 | Ldhb          | 16832  | greenyellow  |
| ENSMUSG00000097597 | NA            | NA     | blue         |
| ENSMUSG00000093862 | NA            | NA     | blue         |
| ENSMUSG00000098019 | NA            | NA     | greenyellow  |
| ENSMUSG00000102740 | NA            | NA     | turquoise    |
| ENSMUSG00000055184 | Fam72a        | 108900 | red          |
| ENSMUSG00000102742 | Pcdhga11      | 93723  | blue         |
| ENSMUSG00000083353 | NA            | NA     | cyan         |
| ENSMUSG00000090083 | Rnf8          | 58230  | yellow       |
| ENSMUSG00000033790 | Tubgcp5       | 233276 | blue         |
| ENSMUSG00000033792 | NA            | NA     | turquoise    |
| ENSMUSG00000066116 | NA            | NA     | tan          |
| ENSMUSG00000016552 | Foxred2       | 239554 | brown        |
| ENSMUSG00000033793 | Atp6v1h       | 108664 | turquoise    |
| ENSMUSG00000090086 | NA            | NA     | black        |
| ENSMUSG00000016554 | Eif3d         | 55944  | red          |

|                    |               |        |           |
|--------------------|---------------|--------|-----------|
| ENSMUSG00000034210 | Efcab14       | 230648 | yellow    |
| ENSMUSG00000051451 | Crebzf        | 233490 | turquoise |
| ENSMUSG00000009828 | Ick           | 56542  | blue      |
| ENSMUSG00000023284 | Zfp605        | 675812 | turquoise |
| ENSMUSG00000034211 | Mrps17        | 66258  | green     |
| ENSMUSG00000033799 | Fam208b       | 105203 | lightcyan |
| ENSMUSG00000023286 | Ube2j2        | 140499 | blue      |
| ENSMUSG00000016559 | H3f3b         | 15081  | red       |
| ENSMUSG00000001891 | Ugp2          | 216558 | blue      |
| ENSMUSG00000034216 | Vps18         | 228545 | blue      |
| ENSMUSG00000034218 | Atm           | 11920  | turquoise |
| ENSMUSG00000069662 | Marcks        | 17118  | purple    |
| ENSMUSG00000002319 | Ipo4          | 75751  | blue      |
| ENSMUSG00000097835 | NA            | NA     | turquoise |
| ENSMUSG00000097839 | NA            | NA     | yellow    |
| ENSMUSG00000037761 | Actr5         | 109275 | turquoise |
| ENSMUSG00000037762 | Slc16a9       | 66859  | turquoise |
| ENSMUSG00000059159 | NA            | NA     | black     |
| ENSMUSG00000055421 | Pcdh9         | 211712 | turquoise |
| ENSMUSG00000027253 | Lrp4          | 228357 | red       |
| ENSMUSG00000027254 | Map1a         | 17754  | blue      |
| ENSMUSG00000027255 | Arfgap2       | 77038  | green     |
| ENSMUSG00000044496 | 2510039O18Rik | 77034  | cyan      |
| ENSMUSG00000027257 | Pacsin3       | 80708  | turquoise |
| ENSMUSG00000040760 | Appl1         | 72993  | pink      |
| ENSMUSG00000040761 | Spen          | 56381  | brown     |
| ENSMUSG00000040767 | Snrnp25       | 78372  | green     |
| ENSMUSG00000030254 | Rad18         | 58186  | magenta   |
| ENSMUSG00000030255 | Sspn          | 16651  | turquoise |
| ENSMUSG00000030256 | Bhlhe41       | 79362  | red       |
| ENSMUSG00000030257 | Srgap3        | 259302 | yellow    |
| ENSMUSG00000098021 | NA            | NA     | brown     |
| ENSMUSG00000058975 | Kcnc1         | 16502  | turquoise |
| ENSMUSG00000098028 | NA            | NA     | yellow    |
| ENSMUSG00000083362 | NA            | NA     | lightcyan |
| ENSMUSG00000058979 | Cecr5         | 214932 | turquoise |
| ENSMUSG00000083364 | NA            | NA     | blue      |
| ENSMUSG00000090093 | NA            | NA     | turquoise |
| ENSMUSG00000083367 | NA            | NA     | green     |
| ENSMUSG00000044730 | NA            | NA     | blue      |
| ENSMUSG00000006050 | Sra1          | 24068  | turquoise |
| ENSMUSG00000090098 | Alms1-ps2     | 623273 | yellow    |
| ENSMUSG00000034220 | Gpc1          | 14733  | red       |
| ENSMUSG00000006057 | NA            | NA     | green     |
| ENSMUSG00000006058 | Snf8          | 27681  | blue      |
| ENSMUSG00000051469 | NA            | NA     | blue      |
| ENSMUSG00000002320 | Tm9sf1        | 74140  | turquoise |
| ENSMUSG00000002326 | Gmpr2         | 105446 | turquoise |
| ENSMUSG00000002329 | Mdp1          | 67881  | turquoise |
| ENSMUSG00000087331 | 1810021B22Rik | 69120  | yellow    |
| ENSMUSG00000069678 | Pcgf1         | 69837  | turquoise |
| ENSMUSG00000087336 | NA            | NA     | blue      |
| ENSMUSG00000037772 | Mrpl23        | 19935  | blue      |
| ENSMUSG00000037773 | Pced1a        | 319513 | blue      |

|                    |         |    |        |             |
|--------------------|---------|----|--------|-------------|
| ENSMUSG00000048701 | Ccdc6   |    | 76551  | brown       |
| ENSMUSG00000055430 | Nap115  |    | 58243  | greenyellow |
| ENSMUSG00000027263 | Tubgcp4 |    | 51885  | green       |
| ENSMUSG00000065947 | NA      | NA |        | yellow      |
| ENSMUSG00000090331 | NA      | NA |        | yellow      |
| ENSMUSG00000005871 | Apc     |    | 11789  | turquoise   |
| ENSMUSG00000055436 | Srsf11  |    | 69207  | green       |
| ENSMUSG00000048709 | NA      | NA |        | lightcyan   |
| ENSMUSG00000005873 | Reep5   |    | 13476  | grey60      |
| ENSMUSG00000090334 | NA      | NA |        | pink        |
| ENSMUSG00000040771 | Oard1   |    | 106821 | blue        |
| ENSMUSG00000062169 | Cnih4   |    | 98417  | green       |
| ENSMUSG00000040774 | Cept1   |    | 99712  | yellow      |
| ENSMUSG00000051703 | Tmem198 |    | 319998 | pink        |
| ENSMUSG00000030264 | Thumpd3 |    | 14911  | green       |
| ENSMUSG00000051705 | Senp8   |    | 71599  | blue        |
| ENSMUSG00000030265 | Kras    |    | 16653  | red         |
| ENSMUSG00000030268 | Bcat1   |    | 12035  | red         |
| ENSMUSG00000030269 | Mtmr14  |    | 97287  | green       |
| ENSMUSG00000093880 | NA      | NA |        | turquoise   |
| ENSMUSG00000098038 | NA      | NA |        | turquoise   |
| ENSMUSG00000102760 | NA      | NA |        | yellow      |
| ENSMUSG00000083373 | NA      | NA |        | turquoise   |
| ENSMUSG00000083374 | NA      | NA |        | lightcyan   |
| ENSMUSG00000059409 | Ppp2r5d |    | 21770  | brown       |
| ENSMUSG00000061981 | Flot2   |    | 14252  | yellow      |
| ENSMUSG00000083378 | NA      | NA |        | pink        |
| ENSMUSG00000061983 | Rps12   |    | 20042  | black       |
| ENSMUSG00000027502 | Rtfdc1  |    | 66404  | turquoise   |
| ENSMUSG00000072915 | NA      | NA |        | turquoise   |
| ENSMUSG00000027506 | Tpd52   |    | 21985  | turquoise   |
| ENSMUSG00000034235 | Usp54   |    | 78787  | yellow      |
| ENSMUSG00000027508 | Pag1    |    | 94212  | turquoise   |
| ENSMUSG00000027509 | Rae1    |    | 66679  | red         |
| ENSMUSG00000002332 | Dhrs1   |    | 52585  | turquoise   |
| ENSMUSG00000012848 | Rps5    |    | 20103  | black       |
| ENSMUSG00000030505 | Prmt3   |    | 71974  | green       |
| ENSMUSG00000069682 | NA      | NA |        | black       |
| ENSMUSG00000030509 | Asb7    |    | 117589 | blue        |
| ENSMUSG00000097859 | NA      | NA |        | turquoise   |
| ENSMUSG00000065950 | NA      | NA |        | turquoise   |
| ENSMUSG00000037784 | Dzip1l  |    | 72507  | turquoise   |
| ENSMUSG00000027272 | Ubr1    |    | 22222  | turquoise   |
| ENSMUSG00000065954 | Tacc1   |    | 320165 | brown       |
| ENSMUSG00000027273 | Snap25  |    | 20614  | brown       |
| ENSMUSG00000037787 | Apopt1  |    | 68020  | blue        |
| ENSMUSG00000027274 | Mkks    |    | 59030  | blue        |
| ENSMUSG00000083610 | NA      | NA |        | yellow      |
| ENSMUSG00000037788 | Vopp1   |    | 232023 | turquoise   |
| ENSMUSG00000027276 | Jag1    |    | 16449  | blue        |
| ENSMUSG00000005881 | Ergic3  |    | 66366  | turquoise   |
| ENSMUSG00000038205 | Prkab2  |    | 108097 | brown       |
| ENSMUSG00000055447 | NA      | NA |        | purple      |
| ENSMUSG00000038206 | NA      | NA |        | turquoise   |

|                    |               |        |           |
|--------------------|---------------|--------|-----------|
| ENSMUSG0000005882  | Uqcc1         | 56046  | turquoise |
| ENSMUSG00000038208 | Pgap3         | 320655 | turquoise |
| ENSMUSG00000040782 | Rfwd2         | 26374  | yellow    |
| ENSMUSG00000005886 | Ncoa2         | 17978  | brown     |
| ENSMUSG00000006301 | Tmbim1        | 69660  | purple    |
| ENSMUSG00000030271 | Ogg1          | 18294  | blue      |
| ENSMUSG00000040785 | Ttc3          | 22129  | blue      |
| ENSMUSG00000030272 | Camk1         | 52163  | turquoise |
| ENSMUSG00000006304 | Arpc2         | 76709  | green     |
| ENSMUSG00000013033 | Adgr1         | 330814 | yellow    |
| ENSMUSG00000030275 | Etnk1         | 75320  | turquoise |
| ENSMUSG00000041203 | 2310036O22Rif | 68544  | red       |
| ENSMUSG00000006307 | Kmt2b         | 75410  | brown     |
| ENSMUSG00000030276 | Ttll3         | 101100 | turquoise |
| ENSMUSG00000030279 | C2cd5         | 74741  | blue      |
| ENSMUSG00000098041 | NA            | NA     | yellow    |
| ENSMUSG00000098048 | NA            | NA     | yellow    |
| ENSMUSG00000083380 | NA            | NA     | turquoise |
| ENSMUSG00000058997 | Vwa8          | 219189 | yellow    |
| ENSMUSG00000083382 | NA            | NA     | cyan      |
| ENSMUSG00000048486 | NA            | NA     | turquoise |
| ENSMUSG00000093897 | NA            | NA     | turquoise |
| ENSMUSG00000044751 | NA            | NA     | blue      |
| ENSMUSG00000066148 | Prpf4         | 70052  | red       |
| ENSMUSG00000061992 | NA            | NA     | yellow    |
| ENSMUSG00000066149 | Cdc26         | 66440  | green     |
| ENSMUSG00000051483 | Cbr1          | 12408  | turquoise |
| ENSMUSG00000034243 | Golgb1        | 224139 | turquoise |
| ENSMUSG00000044757 | NA            | NA     | turquoise |
| ENSMUSG00000034245 | Hdac11        | 232232 | brown     |
| ENSMUSG00000034247 | Plekhm1       | 353047 | cyan      |
| ENSMUSG00000027519 | NA            | NA     | red       |
| ENSMUSG00000034248 | Slc25a37      | 67712  | blue      |
| ENSMUSG00000017009 | Sdc4          | 20971  | black     |
| ENSMUSG00000002341 | Ncan          | 13004  | yellow    |
| ENSMUSG00000002342 | Tmem161a      | 234371 | blue      |
| ENSMUSG00000002343 | Armc6         | 76813  | turquoise |
| ENSMUSG00000030512 | Snrpa1        | 68981  | red       |
| ENSMUSG00000002345 | NA            | NA     | turquoise |
| ENSMUSG00000002346 | Slc25a42      | 73095  | yellow    |
| ENSMUSG00000030515 | Tarsl2        | 272396 | turquoise |
| ENSMUSG00000020003 | Pex7          | 18634  | yellow    |
| ENSMUSG00000030516 | Tjp1          | 21872  | yellow    |
| ENSMUSG00000030519 | Apba2         | 11784  | yellow    |
| ENSMUSG00000059183 | Mtfmt         | 69606  | blue      |
| ENSMUSG00000020009 | Ifngr1        | 15979  | turquoise |
| ENSMUSG00000037791 | Phf12         | 268448 | turquoise |
| ENSMUSG00000048720 | Tbc1d12       | 209478 | turquoise |
| ENSMUSG00000027281 | Slx4ip        | 74243  | turquoise |
| ENSMUSG00000027282 | Mtch2         | 56428  | turquoise |
| ENSMUSG00000037795 | N4bp2         | 333789 | yellow    |
| ENSMUSG00000072692 | NA            | NA     | black     |
| ENSMUSG00000027284 | Cdan1         | 68968  | blue      |
| ENSMUSG00000055452 | NA            | NA     | blue      |

|                    |               |           |              |
|--------------------|---------------|-----------|--------------|
| ENSMUSG00000038212 | Hiatl1        | 66631     | brown        |
| ENSMUSG00000027285 | Haus2         | 66296     | red          |
| ENSMUSG00000083621 | Gm14586       | 100041925 | black        |
| ENSMUSG00000072694 | 1500011B03Rik | 66236     | turquoise    |
| ENSMUSG00000027286 | Lrrc57        | 66606     | green        |
| ENSMUSG00000038213 | Tapbpl        | 213233    | turquoise    |
| ENSMUSG00000038214 | Bend3         | 331623    | turquoise    |
| ENSMUSG00000027287 | Snap23        | 20619     | turquoise    |
| ENSMUSG00000048728 | Zfp454        | 237758    | grey60       |
| ENSMUSG00000038215 | Cep44         | 382010    | red          |
| ENSMUSG00000027288 | Zfp106        | 20402     | blue         |
| ENSMUSG00000083624 | NA            | NA        | pink         |
| ENSMUSG00000083626 | NA            | NA        | turquoise    |
| ENSMUSG00000005893 | Nr2c2         | 22026     | blue         |
| ENSMUSG00000005897 | Nr2c1         | 22025     | turquoise    |
| ENSMUSG00000051721 | BC068281      | 238037    | turquoise    |
| ENSMUSG00000030281 | Il17rc        | 171095    | brown        |
| ENSMUSG00000040794 | C1qtnf4       | 67445     | turquoise    |
| ENSMUSG00000005899 | Smpd4         | 77626     | lightcyan    |
| ENSMUSG00000030282 | Cmas          | 12764     | cyan         |
| ENSMUSG00000040795 | Iqcc          | 230767    | turquoise    |
| ENSMUSG00000051723 | NA            | NA        | brown        |
| ENSMUSG00000006315 | Tmem147       | 69804     | midnightblue |
| ENSMUSG00000030284 | Creld1        | 171508    | turquoise    |
| ENSMUSG00000030286 | Emc3          | 66087     | yellow       |
| ENSMUSG00000051727 | Kctd14        | 233529    | turquoise    |
| ENSMUSG00000030287 | Itpr2         | 16439     | midnightblue |
| ENSMUSG00000041215 | Yeats2        | 208146    | turquoise    |
| ENSMUSG00000041219 | Arhgap11a     | 228482    | magenta      |
| ENSMUSG00000048490 | Nrip1         | 268903    | turquoise    |
| ENSMUSG00000098057 | NA            | NA        | brown        |
| ENSMUSG00000059422 | NA            | NA        | brown        |
| ENSMUSG00000066150 | Slc31a1       | 20529     | turquoise    |
| ENSMUSG00000083391 | NA            | NA        | turquoise    |
| ENSMUSG00000048495 | NA            | NA        | turquoise    |
| ENSMUSG00000066151 | Fkbp15        | 338355    | brown        |
| ENSMUSG00000083392 | NA            | NA        | blue         |
| ENSMUSG00000048497 | NA            | NA        | turquoise    |
| ENSMUSG00000066152 | Slc31a2       | 20530     | turquoise    |
| ENSMUSG00000094320 | NA            | NA        | midnightblue |
| ENSMUSG00000083394 | NA            | NA        | pink         |
| ENSMUSG00000083395 | NA            | NA        | yellow       |
| ENSMUSG00000069939 | NA            | NA        | greenyellow  |
| ENSMUSG00000083396 | NA            | NA        | blue         |
| ENSMUSG00000009863 | Sdhb          | 67680     | turquoise    |
| ENSMUSG00000094326 | NA            | NA        | yellow       |
| ENSMUSG00000044763 | NA            | NA        | green        |
| ENSMUSG00000027522 | Stx16         | 228960    | turquoise    |
| ENSMUSG00000027523 | Gnas          | 14683     | blue         |
| ENSMUSG00000034252 | Senp6         | 215351    | brown        |
| ENSMUSG00000103206 | NA            | NA        | turquoise    |
| ENSMUSG00000062421 | Arf2          | 11841     | brown        |
| ENSMUSG00000027525 | Phactr3       | 74189     | greenyellow  |
| ENSMUSG00000034254 | Agpat1        | 55979     | turquoise    |

|                    |               |        |              |
|--------------------|---------------|--------|--------------|
| ENSMUSG00000051495 | Irf2bp2       | 270110 | turquoise    |
| ENSMUSG00000044768 | D1Ert622e     | 52392  | turquoise    |
| ENSMUSG00000051497 | Kcnj16        | 16517  | yellow       |
| ENSMUSG00000034259 | Exosc4        | 109075 | yellow       |
| ENSMUSG00000030521 | Mphosph10     | 67973  | blue         |
| ENSMUSG00000030522 | Mtmr10        | 233315 | turquoise    |
| ENSMUSG00000030525 | Chrna7        | 11441  | yellow       |
| ENSMUSG00000020014 | Cfap54        | 380654 | turquoise    |
| ENSMUSG00000030527 | Crtc3         | 70461  | yellow       |
| ENSMUSG00000020015 | Cdk17         | 237459 | green        |
| ENSMUSG00000030528 | Blm           | 12144  | salmon       |
| ENSMUSG00000087361 | 0610043K17Rik | 68400  | turquoise    |
| ENSMUSG00000020018 | Snrpf         | 69878  | red          |
| ENSMUSG00000094090 | NA            | NA     | red          |
| ENSMUSG00000059195 | NA            | NA     | green        |
| ENSMUSG00000094092 | NA            | NA     | pink         |
| ENSMUSG00000097877 | NA            | NA     | yellow       |
| ENSMUSG00000106755 | NA            | NA     | yellow       |
| ENSMUSG00000087368 | BC065397      | 436230 | blue         |
| ENSMUSG00000048731 | Ggnbp1        | 70772  | turquoise    |
| ENSMUSG00000027291 | Vps39         | 269338 | blue         |
| ENSMUSG00000048732 | Klhl11        | 217194 | turquoise    |
| ENSMUSG00000062190 | NA            | NA     | pink         |
| ENSMUSG00000065979 | Cpped1        | 223978 | turquoise    |
| ENSMUSG00000038225 | Primpol       | 408022 | yellow       |
| ENSMUSG00000027298 | Tyro3         | 22174  | red          |
| ENSMUSG00000016831 | Tox4          | 268741 | green        |
| ENSMUSG00000062198 | 2700097O09Rik | 72658  | blue         |
| ENSMUSG00000016833 | NA            | NA     | green        |
| ENSMUSG00000051730 | Mettl5        | 75422  | blue         |
| ENSMUSG00000030291 | Med21         | 108098 | brown        |
| ENSMUSG00000041220 | Elovl6        | 170439 | pink         |
| ENSMUSG00000051736 | Fam229b       | 66337  | turquoise    |
| ENSMUSG00000041225 | Arhgap12      | 75415  | turquoise    |
| ENSMUSG00000030298 | Sec13         | 110379 | brown        |
| ENSMUSG00000041229 | Phf8          | 320595 | brown        |
| ENSMUSG00000098066 | NA            | NA     | pink         |
| ENSMUSG00000059436 | Max           | 17187  | turquoise    |
| ENSMUSG00000094334 | NA            | NA     | turquoise    |
| ENSMUSG00000059439 | Bcas3         | 192197 | turquoise    |
| ENSMUSG00000072940 | NA            | NA     | tan          |
| ENSMUSG00000027531 | NA            | NA     | blue         |
| ENSMUSG00000072941 | NA            | NA     | yellow       |
| ENSMUSG00000027533 | Fabp5         | 16592  | turquoise    |
| ENSMUSG00000027534 | Snx16         | 74718  | turquoise    |
| ENSMUSG00000034263 | Vwa9          | 69882  | red          |
| ENSMUSG00000006095 | Tbcb          | 66411  | green        |
| ENSMUSG00000034265 | Zdhc14        | 224454 | pink         |
| ENSMUSG00000072946 | Ptgr2         | 77219  | blue         |
| ENSMUSG00000090602 | NA            | NA     | red          |
| ENSMUSG00000055707 | Klhl26        | 234378 | turquoise    |
| ENSMUSG00000072949 | Acot1         | 26897  | midnightblue |
| ENSMUSG00000034269 | Setd5         | 72895  | blue         |
| ENSMUSG00000023800 | Tiam2         | 24001  | turquoise    |

|                    |          |           |           |
|--------------------|----------|-----------|-----------|
| ENSMUSG00000030530 | Furin    | 18550     | yellow    |
| ENSMUSG00000030532 | Hddc3    | 68695     | turquoise |
| ENSMUSG00000002365 | Snx9     | 66616     | yellow    |
| ENSMUSG00000030533 | Unc45a   | 101869    | brown     |
| ENSMUSG00000023806 | Rsph3b   | 100037282 | turquoise |
| ENSMUSG00000020021 | Fgd6     | 13998     | yellow    |
| ENSMUSG00000030534 | Vps33b   | 233405    | turquoise |
| ENSMUSG00000020022 | Ndufa12  | 66414     | brown     |
| ENSMUSG00000020023 | Tmcc3    | 319880    | turquoise |
| ENSMUSG00000030536 | Iqgap1   | 29875     | brown     |
| ENSMUSG00000023809 | Rps6ka2  | 20112     | turquoise |
| ENSMUSG00000020024 | Cep83    | 77048     | magenta   |
| ENSMUSG00000030538 | Cib1     | 23991     | turquoise |
| ENSMUSG00000087370 | Tmem170b | 621976    | turquoise |
| ENSMUSG00000030539 | Sema4b   | 20352     | purple    |
| ENSMUSG00000097885 | NA       | NA        | brown     |
| ENSMUSG00000020029 | Nudt4    | 71207     | magenta   |
| ENSMUSG00000038233 | Fam198a  | 245050    | purple    |
| ENSMUSG00000048747 | NA       | NA        | yellow    |
| ENSMUSG00000073131 | Vma21    | 67048     | turquoise |
| ENSMUSG00000066406 | Akap13   | 75547     | turquoise |
| ENSMUSG00000066407 | NA       | NA        | cyan      |
| ENSMUSG00000023571 | Fam132a  | 67389     | brown     |
| ENSMUSG00000083649 | Rasl2-9  | 19428     | lightcyan |
| ENSMUSG00000023572 | Ccndbp1  | 17151     | turquoise |
| ENSMUSG00000034501 | Pcnxl4   | 67708     | turquoise |
| ENSMUSG00000006333 | Rps9     | 76846     | green     |
| ENSMUSG00000073139 | BC023829 | 236848    | brown     |
| ENSMUSG00000041231 | Ublcp1   | 79560     | green     |
| ENSMUSG00000006335 | Tfpt     | 69714     | blue      |
| ENSMUSG00000051747 | Ttn      | 22138     | brown     |
| ENSMUSG00000041235 | Chd7     | 320790    | green     |
| ENSMUSG00000041236 | Vps41    | 218035    | blue      |
| ENSMUSG00000041238 | Rbbp8    | 225182    | salmon    |
| ENSMUSG00000002602 | Axl      | 26362     | turquoise |
| ENSMUSG00000098076 | NA       | NA        | turquoise |
| ENSMUSG00000002608 | Ccdc97   | 52132     | blue      |
| ENSMUSG00000087610 | Gm16253  | 105244506 | yellow    |
| ENSMUSG00000066175 | NA       | NA        | blue      |
| ENSMUSG00000059447 | Hadhb    | 231086    | brown     |
| ENSMUSG00000103220 | NA       | NA        | turquoise |
| ENSMUSG00000094344 | NA       | NA        | pink      |
| ENSMUSG00000027540 | Ptpn1    | 19246     | green     |
| ENSMUSG00000044783 | Hjurp    | 381280    | black     |
| ENSMUSG00000034274 | Thoc5    | 107829    | turquoise |
| ENSMUSG00000090610 | NA       | NA        | turquoise |
| ENSMUSG00000044788 | NA       | NA        | yellow    |
| ENSMUSG00000062444 | Ap3b2    | 11775     | blue      |
| ENSMUSG00000045205 | Dpy19l4  | 381510    | blue      |
| ENSMUSG00000034278 | Dnajc17  | 69408     | blue      |
| ENSMUSG00000002372 | Ranbp3   | 71810     | red       |
| ENSMUSG00000030541 | Idh2     | 269951    | turquoise |
| ENSMUSG00000030545 | NA       | NA        | yellow    |
| ENSMUSG00000097891 | NA       | NA        | turquoise |

|                    |               |        |           |
|--------------------|---------------|--------|-----------|
| ENSMUSG0000002379  | Ndufa11       | 69875  | turquoise |
| ENSMUSG00000020037 | Rfx4          | 71137  | turquoise |
| ENSMUSG00000020038 | Cry1          | 12952  | turquoise |
| ENSMUSG00000065990 | Aurkaip1      | 66077  | blue      |
| ENSMUSG00000038240 | Pdss2         | 71365  | brown     |
| ENSMUSG00000098318 | 1190002F15Rik | 381822 | magenta   |
| ENSMUSG00000038241 | Cep250        | 16328  | turquoise |
| ENSMUSG00000048755 | Mcat          | 223722 | blue      |
| ENSMUSG00000048756 | Foxo3         | 56484  | turquoise |
| ENSMUSG00000090381 | NA            | NA     | blue      |
| ENSMUSG00000038244 | Mical2        | 320878 | purple    |
| ENSMUSG00000055485 | NA            | NA     | pink      |
| ENSMUSG00000048758 | Rpl29         | 19944  | black     |
| ENSMUSG00000066415 | NA            | NA     | brown     |
| ENSMUSG00000038248 | Sobp          | 109205 | turquoise |
| ENSMUSG00000090386 | Mir99ahg      | 77994  | turquoise |
| ENSMUSG00000083659 | NA            | NA     | lightcyan |
| ENSMUSG00000073147 | 5031425E22Rik | 269630 | turquoise |
| ENSMUSG00000041241 | Mul1          | 68350  | yellow    |
| ENSMUSG00000024002 | Brd4          | 57261  | green     |
| ENSMUSG00000013076 | Amotl1        | 75723  | turquoise |
| ENSMUSG00000041245 | Wnk3          | 279561 | turquoise |
| ENSMUSG00000034518 | Hmgxb4        | 70823  | turquoise |
| ENSMUSG00000024006 | Stk38         | 106504 | blue      |
| ENSMUSG00000041247 | Lamp3         | 239739 | turquoise |
| ENSMUSG00000024007 | Ppil1         | 68816  | green     |
| ENSMUSG00000002617 | Zfp40         | 22700  | turquoise |
| ENSMUSG00000098087 | NA            | NA     | blue      |
| ENSMUSG00000069962 | NA            | NA     | salmon    |
| ENSMUSG00000066180 | NA            | NA     | turquoise |
| ENSMUSG00000009894 | Snap47        | 67826  | brown     |
| ENSMUSG00000044791 | Setd2         | 235626 | turquoise |
| ENSMUSG00000027550 | Lrrcc1        | 71710  | green     |
| ENSMUSG00000044792 | Isca1         | 69046  | brown     |
| ENSMUSG00000027551 | Zfp64         | 22722  | turquoise |
| ENSMUSG00000055720 | Ubi7          | 69459  | blue      |
| ENSMUSG00000027552 | E2f5          | 13559  | blue      |
| ENSMUSG00000044795 | Cyb5d1        | 327951 | yellow    |
| ENSMUSG00000045210 | Vcpip1        | 70675  | blue      |
| ENSMUSG00000072964 | Bhlhb9        | 70237  | turquoise |
| ENSMUSG00000055725 | Paqr3         | 231474 | turquoise |
| ENSMUSG00000072966 | Gprasp2       | 245607 | turquoise |
| ENSMUSG00000062456 | NA            | NA     | black     |
| ENSMUSG00000072969 | Armcx5        | 494468 | yellow    |
| ENSMUSG00000090625 | NA            | NA     | brown     |
| ENSMUSG00000090626 | NA            | NA     | turquoise |
| ENSMUSG00000062458 | Gm8623        | 667422 | tan       |
| ENSMUSG00000023826 | Park2         | 50873  | turquoise |
| ENSMUSG00000023827 | Agpat4        | 68262  | turquoise |
| ENSMUSG00000030555 | Ttc23         | 67009  | brown     |
| ENSMUSG00000030556 | Lrrc28        | 67867  | turquoise |
| ENSMUSG00000020044 | Timp3         | 21859  | red       |
| ENSMUSG00000030557 | Mef2a         | 17258  | brown     |
| ENSMUSG00000020048 | Hsp90b1       | 22027  | yellow    |



|                    |               |        |           |
|--------------------|---------------|--------|-----------|
| ENSMUSG00000087396 | 4933407K13Rik | 74396  | turquoise |
| ENSMUSG00000055491 | Pprc1         | 226169 | brown     |
| ENSMUSG00000038250 | Usp38         | 74841  | turquoise |
| ENSMUSG00000107205 | NA            | NA     | pink      |
| ENSMUSG00000038252 | Ncapd2        | 68298  | magenta   |
| ENSMUSG00000038256 | Bcl9          | 77578  | turquoise |
| ENSMUSG00000073155 | 1810058I24Rik | 67705  | black     |
| ENSMUSG00000083669 | NA            | NA     | tan       |
| ENSMUSG00000073158 | NA            | NA     | turquoise |
| ENSMUSG00000034522 | Zfp395        | 380912 | blue      |
| ENSMUSG00000006356 | Crip2         | 68337  | turquoise |
| ENSMUSG00000024012 | Mtch1         | 56462  | green     |
| ENSMUSG00000034525 | Ice1          | 218333 | brown     |
| ENSMUSG00000024014 | NA            | NA     | blue      |
| ENSMUSG00000051768 | Xrcc1         | 22594  | green     |
| ENSMUSG00000013089 | Etv5          | 104156 | green     |
| ENSMUSG00000041258 | Zfp236        | 329002 | blue      |
| ENSMUSG00000098090 | 2700099C18Rik | 77022  | magenta   |
| ENSMUSG00000024018 | Ccdc167       | 68597  | lightcyan |
| ENSMUSG00000098091 | NA            | NA     | turquoise |
| ENSMUSG00000024019 | NA            | NA     | turquoise |
| ENSMUSG00000098092 | NA            | NA     | turquoise |
| ENSMUSG00000098093 | NA            | NA     | pink      |
| ENSMUSG00000002625 | Akap8l        | 54194  | turquoise |
| ENSMUSG00000069972 | NA            | NA     | black     |
| ENSMUSG00000059461 | NA            | NA     | tan       |
| ENSMUSG00000066191 | Anks6         | 75691  | turquoise |
| ENSMUSG00000087632 | NA            | NA     | turquoise |
| ENSMUSG00000087633 | NA            | NA     | brown     |
| ENSMUSG00000087635 | NA            | NA     | green     |
| ENSMUSG00000027560 | Dok5          | 76829  | turquoise |
| ENSMUSG00000034290 | Nek9          | 217718 | turquoise |
| ENSMUSG00000027562 | Car2          | 12349  | purple    |
| ENSMUSG00000034292 | Traf3ip1      | 74019  | turquoise |
| ENSMUSG00000083900 | NA            | NA     | blue      |
| ENSMUSG00000062461 | NA            | NA     | tan       |
| ENSMUSG00000027566 | Psm7          | 26444  | black     |
| ENSMUSG00000083902 | NA            | NA     | salmon    |
| ENSMUSG00000055737 | Ghr           | 14600  | yellow    |
| ENSMUSG00000034297 | Med13         | 327987 | turquoise |
| ENSMUSG00000072978 | NA            | NA     | turquoise |
| ENSMUSG00000027569 | Mrgbp         | 73247  | pink      |
| ENSMUSG00000083906 | NA            | NA     | turquoise |
| ENSMUSG00000023830 | Igf2r         | 16004  | turquoise |
| ENSMUSG00000023832 | Acat2         | 110460 | brown     |
| ENSMUSG0000002393  | Nr2f6         | 13864  | magenta   |
| ENSMUSG0000002395  | Use1          | 67023  | blue      |
| ENSMUSG0000002396  | Ocel1         | 77090  | turquoise |
| ENSMUSG00000020052 | Ascl1         | 17172  | purple    |
| ENSMUSG00000020056 | Ccdc53        | 67282  | blue      |
| ENSMUSG00000106793 | NA            | NA     | brown     |
| ENSMUSG00000083670 | NA            | NA     | brown     |
| ENSMUSG00000038267 | Slc22a23      | 73102  | yellow    |
| ENSMUSG00000083676 | NA            | NA     | turquoise |

|                    |               |        |             |
|--------------------|---------------|--------|-------------|
| ENSMUSG00000094605 | NA            | NA     | pink        |
| ENSMUSG00000083678 | NA            | NA     | blue        |
| ENSMUSG00000006360 | Crip1         | 12925  | pink        |
| ENSMUSG00000083679 | NA            | NA     | tan         |
| ENSMUSG00000027803 | Wwtr1         | 97064  | yellow      |
| ENSMUSG00000027804 | Ppid          | 67738  | blue        |
| ENSMUSG00000027805 | Pfn2          | 18645  | turquoise   |
| ENSMUSG00000027806 | Tsc22d2       | 72033  | turquoise   |
| ENSMUSG00000041263 | Rusc1         | 72296  | turquoise   |
| ENSMUSG00000027808 | NA            | NA     | brown       |
| ENSMUSG00000041264 | Uspl1         | 231915 | black       |
| ENSMUSG00000006369 | Fbln1         | 14114  | magenta     |
| ENSMUSG00000027809 | Etfdh         | 66841  | blue        |
| ENSMUSG00000024026 | Glo1          | 109801 | brown       |
| ENSMUSG00000041268 | Dmxl2         | 235380 | turquoise   |
| ENSMUSG00000030801 | Kat8          | 67773  | blue        |
| ENSMUSG00000030802 | Bckdk         | 12041  | blue        |
| ENSMUSG00000002635 | Pdcd2l        | 68079  | green       |
| ENSMUSG00000030805 | Stx4a         | 20909  | yellow      |
| ENSMUSG00000030806 | Stx1b         | 56216  | turquoise   |
| ENSMUSG00000069986 | NA            | NA     | turquoise   |
| ENSMUSG00000059474 | Mbtd1         | 103537 | turquoise   |
| ENSMUSG00000059475 | Zfp426        | 235028 | turquoise   |
| ENSMUSG00000027570 | Col9a3        | 12841  | blue        |
| ENSMUSG00000038500 | Prr3          | 75210  | blue        |
| ENSMUSG00000027573 | NA            | NA     | blue        |
| ENSMUSG00000062470 | Fbxl12os      | 66662  | turquoise   |
| ENSMUSG00000027574 | Nkain4        | 58237  | red         |
| ENSMUSG00000083910 | NA            | NA     | tan         |
| ENSMUSG00000083911 | NA            | NA     | tan         |
| ENSMUSG00000038502 | Ptov1         | 84113  | blue        |
| ENSMUSG00000103257 | Gm7977        | 666202 | brown       |
| ENSMUSG00000027575 | Arfgap1       | 228998 | salmon      |
| ENSMUSG00000038503 | Mesdc2        | 67943  | green       |
| ENSMUSG00000083912 | NA            | NA     | pink        |
| ENSMUSG00000055745 | Ldoc1l        | 223732 | brown       |
| ENSMUSG00000090641 | Zfp712        | 78251  | turquoise   |
| ENSMUSG00000083914 | NA            | NA     | tan         |
| ENSMUSG00000038506 | Dcun1d2       | 102323 | blue        |
| ENSMUSG00000038507 | Parp12        | 243771 | turquoise   |
| ENSMUSG00000045237 | 1110012L19Rik | 68618  | blue        |
| ENSMUSG00000023845 | Lnpep         | 240028 | greenyellow |
| ENSMUSG00000020063 | Sirt1         | 93759  | turquoise   |
| ENSMUSG00000020064 | Herc4         | 67345  | turquoise   |
| ENSMUSG00000041506 | Rrp9          | 27966  | green       |
| ENSMUSG00000020069 | Hnrnph3       | 432467 | green       |
| ENSMUSG00000038271 | Iffo1         | 320678 | brown       |
| ENSMUSG00000066440 | Zfyve26       | 211978 | turquoise   |
| ENSMUSG00000066441 | Rdh11         | 17252  | turquoise   |
| ENSMUSG00000059713 | Rcan3         | 53902  | brown       |
| ENSMUSG00000038274 | Fau           | 14109  | black       |
| ENSMUSG00000059714 | Flot1         | 14251  | turquoise   |
| ENSMUSG00000066442 | Mthfs         | 107885 | turquoise   |
| ENSMUSG00000048787 | Dcun1d3       | 233805 | turquoise   |

|                    |               |        |             |
|--------------------|---------------|--------|-------------|
| ENSMUSG00000066443 | NA            | NA     | yellow      |
| ENSMUSG00000094614 | NA            | NA     | blue        |
| ENSMUSG00000094615 | NA            | NA     | brown       |
| ENSMUSG00000038279 | Nop2          | 110109 | red         |
| ENSMUSG00000027810 | Eif2a         | 229317 | green       |
| ENSMUSG00000084104 | NA            | NA     | greenyellow |
| ENSMUSG00000006373 | Pgrmc1        | 53328  | blue        |
| ENSMUSG00000084106 | NA            | NA     | black       |
| ENSMUSG00000034543 | Morc2a        | 74522  | blue        |
| ENSMUSG00000034544 | Rsrc1         | 66880  | blue        |
| ENSMUSG00000041272 | Tox           | 252838 | blue        |
| ENSMUSG00000051786 | Tubgcp6       | 328580 | blue        |
| ENSMUSG00000006378 | Galr3         | 14429  | blue        |
| ENSMUSG00000017307 | Acot8         | 170789 | turquoise   |
| ENSMUSG00000024037 | Wdr4          | 57773  | green       |
| ENSMUSG00000041278 | Ttc1          | 66827  | turquoise   |
| ENSMUSG00000024038 | Ndufv3        | 78330  | turquoise   |
| ENSMUSG00000024039 | Cbs           | 12411  | yellow      |
| ENSMUSG00000030811 | Fbxl19        | 233902 | blue        |
| ENSMUSG00000020300 | Cpeb4         | 67579  | green       |
| ENSMUSG00000030814 | Bcl7c         | 12055  | turquoise   |
| ENSMUSG00000030815 | Phkg2         | 68961  | turquoise   |
| ENSMUSG00000030816 | Rnf40         | 233900 | green       |
| ENSMUSG00000020305 | Asb3          | 65257  | blue        |
| ENSMUSG00000059482 | 2610301B20Rik | 67157  | blue        |
| ENSMUSG00000069996 | NA            | NA     | salmon      |
| ENSMUSG00000020307 | Cdc34         | 216150 | pink        |
| ENSMUSG00000020308 | Tpgs1         | 110012 | blue        |
| ENSMUSG00000020309 | Chac2         | 68044  | brown       |
| ENSMUSG00000059486 | Kbtbd2        | 210973 | blue        |
| ENSMUSG00000103260 | NA            | NA     | salmon      |
| ENSMUSG00000027581 | Stmn3         | 20262  | red         |
| ENSMUSG00000027582 | Zgpat         | 229007 | blue        |
| ENSMUSG00000038510 | Rpf2          | 67239  | green       |
| ENSMUSG00000027583 | Zbtb46        | 72147  | turquoise   |
| ENSMUSG00000062480 | Acat3         | 224530 | yellow      |
| ENSMUSG00000083922 | NA            | NA     | green       |
| ENSMUSG00000073411 | H2-D1         | 14964  | turquoise   |
| ENSMUSG00000038515 | Grtp1         | 66790  | turquoise   |
| ENSMUSG00000027589 | Pcmt2         | 245867 | turquoise   |
| ENSMUSG00000038518 | Jarid2        | 16468  | cyan        |
| ENSMUSG00000028005 | Gucy1b3       | 54195  | turquoise   |
| ENSMUSG00000073415 | NA            | NA     | blue        |
| ENSMUSG00000083928 | NA            | NA     | lightcyan   |
| ENSMUSG00000045248 | Med26         | 70625  | turquoise   |
| ENSMUSG00000023852 | Chd1          | 12648  | red         |
| ENSMUSG00000020070 | Rufy2         | 70432  | turquoise   |
| ENSMUSG00000030583 | Sipa1l3       | 74206  | turquoise   |
| ENSMUSG00000030584 | Dpf1          | 29861  | brown       |
| ENSMUSG00000020074 | Ccar1         | 67500  | blue        |
| ENSMUSG00000020075 | Ddx21         | 56200  | red         |
| ENSMUSG00000030588 | Yif1b         | 77254  | brown       |
| ENSMUSG00000020076 | Ddx50         | 94213  | green       |
| ENSMUSG00000031004 | Mki67         | 17345  | magenta     |

|                    |          |        |              |
|--------------------|----------|--------|--------------|
| ENSMUSG00000020078 | Vps26a   | 30930  | blue         |
| ENSMUSG00000020079 | Supv3l1  | 338359 | pink         |
| ENSMUSG00000031007 | Atp6ap2  | 70495  | turquoise    |
| ENSMUSG00000038280 | Ostm1    | 14628  | turquoise    |
| ENSMUSG00000048794 | Cfap100  | 243538 | yellow       |
| ENSMUSG00000083692 | NA       | NA     | blue         |
| ENSMUSG00000048796 | Cyb561d1 | 72023  | turquoise    |
| ENSMUSG00000083693 | NA       | NA     | pink         |
| ENSMUSG00000048799 | Cep120   | 225523 | pink         |
| ENSMUSG00000038286 | Bphl     | 68021  | turquoise    |
| ENSMUSG00000066456 | Hmgn3    | 94353  | turquoise    |
| ENSMUSG00000084111 | NA       | NA     | black        |
| ENSMUSG00000084113 | NA       | NA     | salmon       |
| ENSMUSG00000051790 | Nlgn2    | 216856 | turquoise    |
| ENSMUSG00000094627 | NA       | NA     | red          |
| ENSMUSG00000027822 | Slc33a1  | 11416  | yellow       |
| ENSMUSG00000027823 | Gmps     | 229363 | blue         |
| ENSMUSG00000034551 | NA       | NA     | turquoise    |
| ENSMUSG00000084116 | NA       | NA     | pink         |
| ENSMUSG00000084118 | NA       | NA     | yellow       |
| ENSMUSG00000017314 | Mpp2     | 50997  | turquoise    |
| ENSMUSG00000027827 | Kcnab1   | 16497  | cyan         |
| ENSMUSG00000027828 | Ssr3     | 67437  | midnightblue |
| ENSMUSG00000024044 | Epb41i3  | 13823  | grey60       |
| ENSMUSG00000027829 | Ccnl1    | 56706  | blue         |
| ENSMUSG00000034557 | Zfyve9   | 230597 | turquoise    |
| ENSMUSG00000024045 | Akap8    | 56399  | blue         |
| ENSMUSG00000052214 | NA       | NA     | green        |
| ENSMUSG00000024048 | Myl12a   | 67268  | green        |
| ENSMUSG00000062729 | Ppox     | 19044  | turquoise    |
| ENSMUSG00000030822 | Prr14    | 233895 | turquoise    |
| ENSMUSG00000020311 | NA       | NA     | turquoise    |
| ENSMUSG00000030824 | Nucb1    | 18220  | turquoise    |
| ENSMUSG0000002658  | Gtf2f1   | 98053  | green        |
| ENSMUSG00000030826 | Bcat2    | 12036  | turquoise    |
| ENSMUSG00000020315 | Sptbn1   | 20742  | purple       |
| ENSMUSG00000020319 | Wdpcp    | 216560 | brown        |
| ENSMUSG00000059495 | Arhgef12 | 69632  | turquoise    |
| ENSMUSG00000055760 | Gemin6   | 67242  | pink         |
| ENSMUSG00000038520 | Tbc1d17  | 233204 | turquoise    |
| ENSMUSG00000027593 | Raly     | 19383  | red          |
| ENSMUSG00000055762 | Eef1d    | 66656  | blue         |
| ENSMUSG00000045251 | Zfp688   | 69234  | brown        |
| ENSMUSG00000028010 | Gar1     | 68147  | red          |
| ENSMUSG00000038524 | Fchsd1   | 319262 | turquoise    |
| ENSMUSG00000045252 | Zfp574   | 232976 | blue         |
| ENSMUSG00000027597 | Ahcy     | 269378 | salmon       |
| ENSMUSG00000038525 | Armc10   | 67211  | blue         |
| ENSMUSG00000027598 | Itch     | 16396  | blue         |
| ENSMUSG00000073422 | H2-Ke6   | 14979  | turquoise    |
| ENSMUSG00000028013 | Ppa2     | 74776  | blue         |
| ENSMUSG00000027599 | NA       | NA     | green        |
| ENSMUSG00000073423 | Zfp414   | 328801 | turquoise    |
| ENSMUSG00000073424 | Cyp4f15  | 106648 | black        |

|                    |               |           |              |
|--------------------|---------------|-----------|--------------|
| ENSMUSG00000083937 | NA            | NA        | lightcyan    |
| ENSMUSG00000028015 | Ctso          | 229445    | red          |
| ENSMUSG00000045257 | Morn2         | 378462    | turquoise    |
| ENSMUSG00000028016 | Ints12        | 71793     | brown        |
| ENSMUSG00000023861 | Mpc1          | 55951     | turquoise    |
| ENSMUSG00000028017 | Egf           | 13645     | blue         |
| ENSMUSG00000073427 | NA            | NA        | blue         |
| ENSMUSG00000028018 | Gstcd         | 67553     | blue         |
| ENSMUSG00000030591 | Psm8          | 57296     | midnightblue |
| ENSMUSG00000030595 | Nfkbib        | 18036     | turquoise    |
| ENSMUSG00000031010 | Usp9x         | 22284     | turquoise    |
| ENSMUSG00000030598 | Fbxo17        | 50760     | turquoise    |
| ENSMUSG00000031012 | Cask          | 12361     | green        |
| ENSMUSG00000020086 | H2afy2        | 404634    | red          |
| ENSMUSG00000020087 | Tysnd1        | 71767     | turquoise    |
| ENSMUSG00000041528 | Rnf123        | 84585     | turquoise    |
| ENSMUSG00000020088 | Sar1a         | 20224     | turquoise    |
| ENSMUSG00000031015 | Swap70        | 20947     | turquoise    |
| ENSMUSG00000020089 | Ppa1          | 67895     | black        |
| ENSMUSG00000031016 | NA            | NA        | magenta      |
| ENSMUSG00000038290 | Smg6          | 103677    | blue         |
| ENSMUSG00000038291 | Snx25         | 102141    | brown        |
| ENSMUSG00000059734 | Ndufs8        | 225887    | turquoise    |
| ENSMUSG00000049225 | Pdp1          | 381511    | lightcyan    |
| ENSMUSG00000038299 | Wdr36         | 225348    | green        |
| ENSMUSG00000006390 | Elovl1        | 54325     | yellow       |
| ENSMUSG00000073197 | NA            | NA        | turquoise    |
| ENSMUSG00000073198 | Bnip3l-ps     | 100043324 | green        |
| ENSMUSG00000034560 | A230046K03Rif | 319277    | blue         |
| ENSMUSG00000006392 | Med8          | 80509     | blue         |
| ENSMUSG00000103515 | NA            | NA        | turquoise    |
| ENSMUSG00000027834 | NA            | NA        | turquoise    |
| ENSMUSG00000024050 | Wiz           | 22404     | green        |
| ENSMUSG00000034563 | Ccpg1         | 72278     | turquoise    |
| ENSMUSG00000027835 | Pdcd10        | 56426     | yellow       |
| ENSMUSG00000084129 | NA            | NA        | red          |
| ENSMUSG00000024052 | Lpin2         | 64898     | green        |
| ENSMUSG00000034566 | Atp5h         | 71679     | brown        |
| ENSMUSG00000006398 | Cdc20         | 107995    | magenta      |
| ENSMUSG00000024054 | Smchd1        | 74355     | blue         |
| ENSMUSG00000024055 | Cyp4f13       | 170716    | turquoise    |
| ENSMUSG00000024056 | Ndc80         | 67052     | magenta      |
| ENSMUSG00000041297 | Cdk13         | 69562     | turquoise    |
| ENSMUSG00000002660 | Clpp          | 53895     | green        |
| ENSMUSG00000041298 | Katnal1       | 231912    | yellow       |
| ENSMUSG00000002661 | Alkbh7        | 66400     | turquoise    |
| ENSMUSG00000024059 | Clip4         | 78785     | turquoise    |
| ENSMUSG00000020321 | Mdh1          | 17449     | turquoise    |
| ENSMUSG00000030835 | Nomo1         | 211548    | turquoise    |
| ENSMUSG00000020326 | Ccng1         | 12450     | blue         |
| ENSMUSG00000030839 | Sergef        | 27414     | turquoise    |
| ENSMUSG00000020328 | Nudcd2        | 52653     | blue         |
| ENSMUSG00000020329 | Polrmt        | 216151    | blue         |
| ENSMUSG00000103280 | NA            | NA        | turquoise    |

|                    |          |           |           |
|--------------------|----------|-----------|-----------|
| ENSMUSG00000087679 | NA       | NA        | blue      |
| ENSMUSG00000077167 | NA       | NA        | turquoise |
| ENSMUSG00000055771 | NA       | NA        | turquoise |
| ENSMUSG00000103285 | NA       | NA        | turquoise |
| ENSMUSG00000038533 | Cbfa2t2  | 12396     | red       |
| ENSMUSG00000028020 | Glrh     | 14658     | turquoise |
| ENSMUSG00000038534 | Osbpl7   | 71240     | turquoise |
| ENSMUSG00000038535 | Zfp280d  | 235469    | green     |
| ENSMUSG00000066705 | Fxyd6    | 59095     | green     |
| ENSMUSG00000073434 | Wdr90    | 106618    | green     |
| ENSMUSG00000038538 | Ubn2     | 320538    | turquoise |
| ENSMUSG00000038539 | Atf5     | 107503    | green     |
| ENSMUSG00000073436 | Eme2     | 193838    | blue      |
| ENSMUSG00000045268 | Zfp691   | 195522    | turquoise |
| ENSMUSG00000034800 | Zfp661   | 72180     | brown     |
| ENSMUSG00000028029 | Aimp1    | 13722     | red       |
| ENSMUSG00000034801 | Sos2     | 20663     | turquoise |
| ENSMUSG00000041530 | Ago1     | 236511    | turquoise |
| ENSMUSG00000031021 | Tmem9b   | 56786     | turquoise |
| ENSMUSG00000034807 | Colgalt1 | 234407    | green     |
| ENSMUSG00000031023 | Akip1    | 57373     | yellow    |
| ENSMUSG00000020097 | Sgpl1    | 20397     | turquoise |
| ENSMUSG00000031024 | St5      | 76954     | yellow    |
| ENSMUSG00000020098 | Pcbd1    | 13180     | blue      |
| ENSMUSG00000031029 | NA       | NA        | blue      |
| ENSMUSG00000059742 | NA       | NA        | red       |
| ENSMUSG00000049230 | Gm9833   | 100041480 | red       |
| ENSMUSG00000059743 | Fdps     | 110196    | turquoise |
| ENSMUSG00000107257 | NA       | NA        | green     |
| ENSMUSG00000049231 | NA       | NA        | blue      |
| ENSMUSG00000049232 | Tigd2    | 68140     | yellow    |
| ENSMUSG00000107259 | NA       | NA        | yellow    |
| ENSMUSG00000049233 | NA       | NA        | brown     |
| ENSMUSG00000049235 | NA       | NA        | red       |
| ENSMUSG00000084131 | NA       | NA        | tan       |
| ENSMUSG00000094649 | Gm7102   | 633057    | turquoise |
| ENSMUSG00000034573 | Ptpn13   | 19249     | turquoise |
| ENSMUSG00000062742 | NA       | NA        | tan       |
| ENSMUSG00000034574 | Daam1    | 208846    | turquoise |
| ENSMUSG00000084139 | NA       | NA        | yellow    |
| ENSMUSG00000034575 | Papd7    | 210106    | blue      |
| ENSMUSG00000024063 | Lbh      | 77889     | turquoise |
| ENSMUSG00000045503 | Sys1     | 66460     | blue      |
| ENSMUSG00000024065 | Ehd3     | 57440     | yellow    |
| ENSMUSG00000024067 | Dpy30    | 66310     | red       |
| ENSMUSG00000024068 | Spast    | 50850     | blue      |
| ENSMUSG00000024069 | Slc30a6  | 210148    | turquoise |
| ENSMUSG00000090919 | Pabpc4l  | 241989    | turquoise |
| ENSMUSG00000030842 | Lamtor1  | 66508     | turquoise |
| ENSMUSG00000020330 | Hmmr     | 15366     | magenta   |
| ENSMUSG00000020333 | Acsl6    | 216739    | red       |
| ENSMUSG00000030846 | Tial1    | 21843     | turquoise |
| ENSMUSG00000002679 | Med6     | 69792     | blue      |
| ENSMUSG00000030847 | Bag3     | 29810     | turquoise |

|                    |               |           |              |
|--------------------|---------------|-----------|--------------|
| ENSMUSG00000030849 | Fgfr2         | 14183     | turquoise    |
| ENSMUSG00000087687 | Pet100        | 100503890 | blue         |
| ENSMUSG00000103291 | NA            | NA        | turquoise    |
| ENSMUSG00000103293 | NA            | NA        | blue         |
| ENSMUSG00000055782 | Abcd2         | 26874     | turquoise    |
| ENSMUSG00000038542 | Pcid2         | 234069    | green        |
| ENSMUSG00000028030 | Tbck          | 271981    | green        |
| ENSMUSG00000038544 | Inip          | 66209     | red          |
| ENSMUSG00000038545 | Cul7          | 66515     | yellow       |
| ENSMUSG00000090682 | NA            | NA        | yellow       |
| ENSMUSG00000028032 | Papss1        | 23971     | blue         |
| ENSMUSG00000056201 | NA            | NA        | greenyellow  |
| ENSMUSG00000038546 | Ranbp9        | 56705     | blue         |
| ENSMUSG00000028034 | Fubp1         | 51886     | blue         |
| ENSMUSG00000028035 | Dnajb4        | 67035     | turquoise    |
| ENSMUSG00000056204 | Pgpep1        | 66522     | turquoise    |
| ENSMUSG00000023883 | Phf10         | 72057     | brown        |
| ENSMUSG00000056209 | Npm3          | 18150     | turquoise    |
| ENSMUSG00000041540 | Sox5          | 20678     | turquoise    |
| ENSMUSG00000034813 | Grip1         | 74053     | brown        |
| ENSMUSG00000024302 | Dtna          | 13527     | grey60       |
| ENSMUSG00000041544 | NA            | NA        | turquoise    |
| ENSMUSG00000024304 | Cdh2          | 12558     | yellow       |
| ENSMUSG00000002910 | Arrdc2        | 70807     | turquoise    |
| ENSMUSG00000041548 | Hspb8         | 80888     | turquoise    |
| ENSMUSG00000024308 | Tapbp         | 21356     | greenyellow  |
| ENSMUSG00000024309 | Pfdn6         | 14976     | green        |
| ENSMUSG00000107261 | NA            | NA        | blue         |
| ENSMUSG00000059751 | NA            | NA        | black        |
| ENSMUSG00000049246 | NA            | NA        | turquoise    |
| ENSMUSG00000066487 | NA            | NA        | red          |
| ENSMUSG00000084145 | NA            | NA        | blue         |
| ENSMUSG00000027852 | Nras          | 18176     | blue         |
| ENSMUSG00000027854 | NA            | NA        | turquoise    |
| ENSMUSG00000024070 | Prkd3         | 75292     | brown        |
| ENSMUSG00000084149 | NA            | NA        | blue         |
| ENSMUSG00000024072 | Yipf4         | 67864     | midnightblue |
| ENSMUSG00000062753 | NA            | NA        | purple       |
| ENSMUSG00000024073 | Birc6         | 12211     | blue         |
| ENSMUSG00000034587 | 8430429K09Rik | 71523     | turquoise    |
| ENSMUSG00000045515 | NA            | NA        | yellow       |
| ENSMUSG00000024077 | Strn          | 268980    | blue         |
| ENSMUSG00000062758 | NA            | NA        | tan          |
| ENSMUSG00000024079 | Eif2ak2       | 19106     | lightcyan    |
| ENSMUSG00000045519 | Zfp560        | 434377    | turquoise    |
| ENSMUSG00000030850 | Ate1          | 11907     | yellow       |
| ENSMUSG00000035007 | Rundc1        | 217201    | turquoise    |
| ENSMUSG00000030852 | Tacc2         | 57752     | pink         |
| ENSMUSG00000020340 | Cyfip2        | 76884     | turquoise    |
| ENSMUSG00000002688 | Prkd1         | 18760     | brown        |
| ENSMUSG00000020346 | Mgat1         | 17308     | turquoise    |
| ENSMUSG00000020349 | NA            | NA        | turquoise    |
| ENSMUSG00000107501 | NA            | NA        | blue         |
| ENSMUSG00000038552 | Fndc4         | 64339     | turquoise    |

|                    |               |        |              |
|--------------------|---------------|--------|--------------|
| ENSMUSG00000083962 | NA            | NA     | brown        |
| ENSMUSG00000055795 | NA            | NA     | tan          |
| ENSMUSG00000045282 | Tmem86b       | 68255  | turquoise    |
| ENSMUSG00000038555 | Reep2         | 225362 | blue         |
| ENSMUSG00000083964 | NA            | NA     | blue         |
| ENSMUSG00000056211 | R3hdm1        | 226412 | brown        |
| ENSMUSG00000066724 | NA            | NA     | green        |
| ENSMUSG00000028044 | Cks1b         | 54124  | magenta      |
| ENSMUSG00000056214 | Pard6g        | 93737  | turquoise    |
| ENSMUSG00000028047 | Thbs3         | 21827  | turquoise    |
| ENSMUSG00000023892 | Zfp51         | 22709  | turquoise    |
| ENSMUSG00000006651 | Aplp1         | 11803  | purple       |
| ENSMUSG00000056216 | Cebpg         | 12611  | blue         |
| ENSMUSG00000028048 | Gba           | 14466  | turquoise    |
| ENSMUSG00000034820 | Cpsf7         | 269061 | turquoise    |
| ENSMUSG00000028049 | Scamp3        | 24045  | yellow       |
| ENSMUSG00000024312 | Wdr46         | 57315  | green        |
| ENSMUSG00000034826 | Nup54         | 269113 | turquoise    |
| ENSMUSG00000041556 | Fbxo2         | 230904 | red          |
| ENSMUSG00000024317 | Rnf138        | 56515  | blue         |
| ENSMUSG00000024319 | Vps52         | 224705 | midnightblue |
| ENSMUSG00000066491 | NA            | NA     | turquoise    |
| ENSMUSG00000107277 | NA            | NA     | cyan         |
| ENSMUSG00000107278 | NA            | NA     | brown        |
| ENSMUSG00000087938 | NA            | NA     | turquoise    |
| ENSMUSG00000062760 | 1810041L15Rik | 72301  | turquoise    |
| ENSMUSG00000034593 | Myo5a         | 17918  | brown        |
| ENSMUSG00000062761 | Zfp512        | 269639 | brown        |
| ENSMUSG00000027865 | Gdap2         | 14547  | green        |
| ENSMUSG00000024081 | Cebpz         | 12607  | green        |
| ENSMUSG00000062762 | Ei24          | 13663  | turquoise    |
| ENSMUSG00000084159 | NA            | NA     | black        |
| ENSMUSG00000024082 | Ndufaf7       | 73694  | turquoise    |
| ENSMUSG00000024083 | Pja2          | 224938 | turquoise    |
| ENSMUSG00000035011 | Zbtb7a        | 16969  | brown        |
| ENSMUSG00000052253 | Zfp622        | 52521  | magenta      |
| ENSMUSG00000090935 | NA            | NA     | blue         |
| ENSMUSG00000030861 | Acadsb        | 66885  | turquoise    |
| ENSMUSG00000013622 | Atraid        | 381629 | purple       |
| ENSMUSG00000030867 | Plk1          | 18817  | magenta      |
| ENSMUSG00000030868 | Dctn5         | 59288  | turquoise    |
| ENSMUSG00000030869 | NA            | NA     | turquoise    |
| ENSMUSG00000013629 | Cad           | 69719  | green        |
| ENSMUSG00000020358 | Hnmpab        | 15384  | black        |
| ENSMUSG00000020359 | NA            | NA     | green        |
| ENSMUSG00000003119 | Cdk12         | 69131  | brown        |
| ENSMUSG00000083971 | NA            | NA     | yellow       |
| ENSMUSG00000038564 | Ift172        | 67661  | turquoise    |
| ENSMUSG00000045294 | Insig1        | 231070 | turquoise    |
| ENSMUSG00000028053 | Ash1l         | 192195 | turquoise    |
| ENSMUSG00000038569 | Rad9b         | 231724 | turquoise    |
| ENSMUSG00000028057 | Rit1          | 19769  | turquoise    |
| ENSMUSG00000073468 | Sft2d1        | 106489 | yellow       |
| ENSMUSG00000091123 | NA            | NA     | brown        |



|                    |               |    |           |              |
|--------------------|---------------|----|-----------|--------------|
| ENSMUSG00000028059 | Arhgef2       |    | 16800     | blue         |
| ENSMUSG00000080198 | NA            | NA |           | turquoise    |
| ENSMUSG00000034832 | Tet3          |    | 194388    | blue         |
| ENSMUSG00000041560 | NA            | NA |           | brown        |
| ENSMUSG00000024325 | Ring1         |    | 19763     | green        |
| ENSMUSG00000024327 | Slc39a7       |    | 14977     | blue         |
| ENSMUSG00000100009 | Gm7967        |    | 666182    | brown        |
| ENSMUSG00000031059 | Ndufb11       |    | 104130    | turquoise    |
| ENSMUSG00000107283 | Mpv17         |    | 17527     | greenyellow  |
| ENSMUSG00000059772 | Slx1b         |    | 75764     | yellow       |
| ENSMUSG00000059775 | NA            | NA |           | black        |
| ENSMUSG00000087943 | NA            | NA |           | yellow       |
| ENSMUSG00000059776 | Rpl13-ps6     |    | 100040416 | black        |
| ENSMUSG00000084168 | NA            | NA |           | brown        |
| ENSMUSG00000024091 | Vapa          |    | 30960     | turquoise    |
| ENSMUSG00000038803 | Ost4          |    | 67695     | midnightblue |
| ENSMUSG00000090941 | NA            | NA |           | brown        |
| ENSMUSG00000038805 | Six3          |    | 20473     | turquoise    |
| ENSMUSG00000027878 | Notch2        |    | 18129     | yellow       |
| ENSMUSG00000035021 | Baz1a         |    | 217578    | green        |
| ENSMUSG00000038806 | Sde2          |    | 208768    | turquoise    |
| ENSMUSG00000027879 | NA            | NA |           | brown        |
| ENSMUSG00000073702 | Rpl31         |    | 114641    | black        |
| ENSMUSG00000024095 | Hnrnp11       |    | 72692     | blue         |
| ENSMUSG00000024096 | Ralbp1        |    | 19765     | turquoise    |
| ENSMUSG00000024097 | Srsf7         |    | 225027    | black        |
| ENSMUSG00000090946 | Ccdc711       |    | 72123     | turquoise    |
| ENSMUSG00000035024 | Ncapd3        |    | 78658     | magenta      |
| ENSMUSG00000073705 | Apitd1        |    | 69928     | salmon       |
| ENSMUSG00000024098 | Twsg1         |    | 65960     | black        |
| ENSMUSG00000045538 | Ddx28         |    | 71986     | yellow       |
| ENSMUSG00000024099 | Ndufv2        |    | 72900     | turquoise    |
| ENSMUSG00000030870 | Ubfd1         |    | 28018     | brown        |
| ENSMUSG00000035027 | Map2k2        |    | 26396     | red          |
| ENSMUSG00000030871 | Ears2         |    | 67417     | blue         |
| ENSMUSG00000030872 | Gga2          |    | 74105     | grey60       |
| ENSMUSG00000020361 | Hspa4         |    | 15525     | red          |
| ENSMUSG00000020362 | Cnot6         |    | 104625    | blue         |
| ENSMUSG00000006906 | Stambp        |    | 70527     | brown        |
| ENSMUSG00000020363 | Gfpt2         |    | 14584     | turquoise    |
| ENSMUSG00000030876 | Mettl9        |    | 59052     | green        |
| ENSMUSG00000020364 | Zfp354a       |    | 21408     | turquoise    |
| ENSMUSG00000003123 | Lipe          |    | 16890     | yellow       |
| ENSMUSG00000020366 | Mapk9         |    | 26420     | red          |
| ENSMUSG00000030879 | NA            | NA |           | green        |
| ENSMUSG00000020368 | Canx          |    | 12330     | brown        |
| ENSMUSG00000107524 | NA            | NA |           | turquoise    |
| ENSMUSG00000028060 | 2810403A07Rik |    | 74200     | turquoise    |
| ENSMUSG00000073471 | Rsph3a        |    | 66832     | brown        |
| ENSMUSG00000049502 | Dtx3l         |    | 209200    | turquoise    |
| ENSMUSG00000028062 | Lamtor2       |    | 83409     | green        |
| ENSMUSG00000028063 | Lmna          |    | 16905     | turquoise    |
| ENSMUSG00000049504 | Proser1       |    | 212127    | green        |
| ENSMUSG00000028064 | Sema4a        |    | 20351     | greenyellow  |

|                    |               |        |             |
|--------------------|---------------|--------|-------------|
| ENSMUSG00000056234 | Ncoa4         | 27057  | turquoise   |
| ENSMUSG00000028066 | Pmf1          | 67037  | magenta     |
| ENSMUSG00000028068 | Iqgap3        | 404710 | magenta     |
| ENSMUSG00000073478 | NA            | NA     | turquoise   |
| ENSMUSG00000028069 | Gpatch4       | 66614  | blue        |
| ENSMUSG00000006673 | Qrich1        | 69232  | black       |
| ENSMUSG00000034842 | Art3          | 109979 | yellow      |
| ENSMUSG00000041570 | Camsap2       | 67886  | turquoise   |
| ENSMUSG00000024330 | Col11a2       | 12815  | black       |
| ENSMUSG00000006675 | P4htm         | 74443  | turquoise   |
| ENSMUSG00000041571 | Sepw1         | 20364  | greenyellow |
| ENSMUSG00000006676 | Usp19         | 71472  | turquoise   |
| ENSMUSG00000031060 | Rbm10         | 236732 | blue        |
| ENSMUSG00000006678 | Pola1         | 18968  | green       |
| ENSMUSG00000024335 | Brd2          | 14312  | green       |
| ENSMUSG00000100017 | NA            | NA     | turquoise   |
| ENSMUSG00000034848 | Ttc21b        | 73668  | turquoise   |
| ENSMUSG00000052504 | NA            | NA     | blue        |
| ENSMUSG00000100018 | NA            | NA     | pink        |
| ENSMUSG00000031065 | Cdk16         | 18555  | green       |
| ENSMUSG00000031066 | Usp11         | 236733 | turquoise   |
| ENSMUSG00000024339 | NA            | NA     | yellow      |
| ENSMUSG00000031068 | Glrx3         | 30926  | red         |
| ENSMUSG00000020601 | Trib2         | 217410 | yellow      |
| ENSMUSG00000002948 | Map2k7        | 26400  | turquoise   |
| ENSMUSG00000002949 | Timm44        | 21856  | turquoise   |
| ENSMUSG00000020607 | Fam84a        | 105005 | pink        |
| ENSMUSG00000020608 | Smc6          | 67241  | green       |
| ENSMUSG00000084170 | NA            | NA     | turquoise   |
| ENSMUSG00000094683 | NA            | NA     | turquoise   |
| ENSMUSG00000103560 | NA            | NA     | turquoise   |
| ENSMUSG00000094685 | NA            | NA     | turquoise   |
| ENSMUSG00000027881 | Prpf38b       | 66921  | blue        |
| ENSMUSG00000027882 | Stxbp3        | 20912  | yellow      |
| ENSMUSG00000027883 | Gpsm2         | 76123  | magenta     |
| ENSMUSG00000027884 | Clcc1         | 229725 | turquoise   |
| ENSMUSG00000038812 | Trmt112       | 67674  | blue        |
| ENSMUSG00000103567 | Pcdhga5       | 93713  | lightcyan   |
| ENSMUSG00000028300 | 3110043O21Ril | 73205  | blue        |
| ENSMUSG00000103568 | NA            | NA     | turquoise   |
| ENSMUSG00000090952 | NA            | NA     | turquoise   |
| ENSMUSG00000017376 | Nik           | 18099  | turquoise   |
| ENSMUSG00000038816 | Ctnnal1       | 54366  | brown       |
| ENSMUSG00000062785 | Kcnc3         | 16504  | turquoise   |
| ENSMUSG00000027889 | Ampd2         | 109674 | turquoise   |
| ENSMUSG00000063200 | Nol7          | 70078  | black       |
| ENSMUSG00000090957 | NA            | NA     | pink        |
| ENSMUSG00000030880 | Polr3e        | 26939  | pink        |
| ENSMUSG00000030881 | Arfip2        | 76932  | turquoise   |
| ENSMUSG00000028309 | Rnf20         | 109331 | blue        |
| ENSMUSG00000030882 | Dnhd1         | 77505  | yellow      |
| ENSMUSG00000030884 | Uqcrc2        | 67003  | blue        |
| ENSMUSG00000020372 | Gnb2l1        | 14694  | black       |
| ENSMUSG00000003131 | Pafah1b2      | 18475  | blue        |

|                    |         |           |              |
|--------------------|---------|-----------|--------------|
| ENSMUSG00000013646 | Sh3bp5l | 79566     | green        |
| ENSMUSG00000041815 | Poldip3 | 73826     | blue         |
| ENSMUSG00000020375 | Rufy1   | 216724    | green        |
| ENSMUSG00000030888 | NA      | NA        | green        |
| ENSMUSG00000031302 | NA      | NA        | brown        |
| ENSMUSG00000003134 | Tbc1d8  | 54610     | greenyellow  |
| ENSMUSG00000020376 | Rnf130  | 59044     | yellow       |
| ENSMUSG00000003135 | Cnot11  | 52846     | turquoise    |
| ENSMUSG00000031309 | Rps6ka3 | 110651    | lightcyan    |
| ENSMUSG00000038582 | Pptc7   | 320717    | yellow       |
| ENSMUSG00000083992 | Gm11478 | 100504632 | black        |
| ENSMUSG00000038583 | Pln     | 18821     | turquoise    |
| ENSMUSG00000028070 | Apoa1bp | 246703    | turquoise    |
| ENSMUSG00000083993 | NA      | NA        | yellow       |
| ENSMUSG00000073481 | 1-Mar   | 67247     | yellow       |
| ENSMUSG00000039000 | Ube3c   | 100763    | brown        |
| ENSMUSG00000083995 | NA      | NA        | turquoise    |
| ENSMUSG00000039001 | Rps21   | 66481     | black        |
| ENSMUSG00000084411 | NA      | NA        | pink         |
| ENSMUSG00000049516 | Spty2d1 | 101685    | blue         |
| ENSMUSG00000028076 | Cd1d1   | 12479     | blue         |
| ENSMUSG00000049517 | NA      | NA        | black        |
| ENSMUSG00000084413 | NA      | NA        | yellow       |
| ENSMUSG00000028078 | Dclk2   | 70762     | turquoise    |
| ENSMUSG00000034850 | Tmem127 | 69470     | turquoise    |
| ENSMUSG00000103805 | NA      | NA        | turquoise    |
| ENSMUSG00000039007 | Cpq     | 54381     | yellow       |
| ENSMUSG00000084416 | NA      | NA        | black        |
| ENSMUSG00000034853 | Acot11  | 329910    | greenyellow  |
| ENSMUSG00000103808 | NA      | NA        | pink         |
| ENSMUSG00000017615 | Tnfaip1 | 21927     | midnightblue |
| ENSMUSG00000100025 | NA      | NA        | tan          |
| ENSMUSG00000031072 | Oraov1  | 72284     | pink         |
| ENSMUSG00000052512 | Nav2    | 78286     | turquoise    |
| ENSMUSG00000034858 | Fam214a | 235493    | turquoise    |
| ENSMUSG00000024346 | Pfdn1   | 67199     | red          |
| ENSMUSG00000024347 | Psd2    | 74002     | blue         |
| ENSMUSG00000052516 | Robo2   | 268902    | turquoise    |
| ENSMUSG00000031078 | Cttn    | 13043     | red          |
| ENSMUSG00000020610 | Amz2    | 13929     | blue         |
| ENSMUSG00000020611 | Gna13   | 14674     | turquoise    |
| ENSMUSG00000020612 | Prkar1a | 19084     | brown        |
| ENSMUSG00000002957 | Ap2a2   | 11772     | green        |
| ENSMUSG00000020614 | Fam20a  | 208659    | purple       |
| ENSMUSG00000059791 | Nrm     | 106582    | salmon       |
| ENSMUSG00000077450 | Rab11b  | 19326     | brown        |
| ENSMUSG00000059796 | Eif4a1  | 13681     | black        |
| ENSMUSG00000049285 | Mblac1  | 330216    | turquoise    |
| ENSMUSG00000049287 | Iba57   | 216792    | turquoise    |
| ENSMUSG00000084183 | NA      | NA        | brown        |
| ENSMUSG00000049288 | NA      | NA        | yellow       |
| ENSMUSG00000077457 | NA      | NA        | yellow       |
| ENSMUSG00000084185 | NA      | NA        | tan          |
| ENSMUSG00000027893 | Ahcyl1  | 229709    | turquoise    |

|                    |          |           |              |
|--------------------|----------|-----------|--------------|
| ENSMUSG00000038822 | Hace1    | 209462    | turquoise    |
| ENSMUSG00000027896 | Slc16a4  | 229699    | turquoise    |
| ENSMUSG00000028312 | Smc2     | 14211     | magenta      |
| ENSMUSG00000017386 | NA       | NA        | red          |
| ENSMUSG00000038827 | Fam206a  | 230234    | turquoise    |
| ENSMUSG00000038828 | NA       | NA        | brown        |
| ENSMUSG00000062797 | NA       | NA        | green        |
| ENSMUSG00000073725 | Lmbrd1   | 68421     | greenyellow  |
| ENSMUSG00000006920 | Ezh1     | 14055     | turquoise    |
| ENSMUSG00000035045 | NA       | NA        | yellow       |
| ENSMUSG00000030890 | Ilk      | 16202     | turquoise    |
| ENSMUSG00000028318 | Polr1e   | 64424     | green        |
| ENSMUSG00000035047 | Kri1     | 215194    | turquoise    |
| ENSMUSG00000035048 | Anapc13  | 69010     | midnightblue |
| ENSMUSG00000035049 | Rrp12    | 107094    | blue         |
| ENSMUSG00000020380 | Rad50    | 19360     | blue         |
| ENSMUSG00000030894 | Tpp1     | 12751     | purple       |
| ENSMUSG00000031310 | Zmym3    | 56364     | turquoise    |
| ENSMUSG00000031311 | Nono     | 53610     | green        |
| ENSMUSG00000020385 | Clk4     | 12750     | turquoise    |
| ENSMUSG00000020386 | Sar1b    | 66397     | yellow       |
| ENSMUSG00000031314 | Taf1     | 270627    | green        |
| ENSMUSG00000020388 | Pdlim4   | 30794     | blue         |
| ENSMUSG00000020389 | Cdkl3    | 213084    | brown        |
| ENSMUSG00000098661 | Mir7052  | 102465637 | turquoise    |
| ENSMUSG00000028080 | Lrba     | 80877     | turquoise    |
| ENSMUSG00000038593 | NA       | NA        | blue         |
| ENSMUSG00000049521 | Cdc42ep1 | 104445    | turquoise    |
| ENSMUSG00000038594 | Cep85l   | 100038725 | yellow       |
| ENSMUSG00000028081 | Rps3a1   | 20091     | black        |
| ENSMUSG00000028085 | Gatb     | 229487    | turquoise    |
| ENSMUSG00000094935 | NA       | NA        | turquoise    |
| ENSMUSG00000028086 | Fbxw7    | 50754     | green        |
| ENSMUSG00000039016 | Timm8b   | 30057     | brown        |
| ENSMUSG00000028089 | Chd1l    | 68058     | pink         |
| ENSMUSG00000056258 | NA       | NA        | turquoise    |
| ENSMUSG00000039018 | Mtg1     | 212508    | turquoise    |
| ENSMUSG00000024350 | Dnajc18  | 76594     | turquoise    |
| ENSMUSG00000041592 | Sdk2     | 237979    | turquoise    |
| ENSMUSG00000100033 | NA       | NA        | tan          |
| ENSMUSG00000024352 | Spata24  | 71242     | turquoise    |
| ENSMUSG00000041594 | Tmtc4    | 70551     | blue         |
| ENSMUSG00000006699 | Cdc42    | 12540     | turquoise    |
| ENSMUSG00000034867 | Ankrd27  | 245886    | brown        |
| ENSMUSG00000034868 | NA       | NA        | black        |
| ENSMUSG00000024357 | Sil1     | 81500     | yellow       |
| ENSMUSG00000041598 | Cdc42ep4 | 56699     | yellow       |
| ENSMUSG00000024359 | Hspa9    | 15526     | blue         |
| ENSMUSG00000042015 | Wdr41    | 218460    | turquoise    |
| ENSMUSG00000002963 | Pnkp     | 59047     | turquoise    |
| ENSMUSG00000020621 | Rdh14    | 105014    | turquoise    |
| ENSMUSG00000010110 | Stx5a    | 56389     | brown        |
| ENSMUSG00000020623 | Map2k6   | 26399     | turquoise    |
| ENSMUSG00000002968 | Med25    | 75613     | turquoise    |

|                    |            |           |           |
|--------------------|------------|-----------|-----------|
| ENSMUSG00000020628 | Trappc12   | 217449    | brown     |
| ENSMUSG00000020629 | Adi1       | 104923    | blue      |
| ENSMUSG00000098900 | NA         | NA        | turquoise |
| ENSMUSG00000049295 | Zfp219     | 69890     | brown     |
| ENSMUSG00000084193 | NA         | NA        | grey60    |
| ENSMUSG00000049299 | Trappc1    | 245828    | green     |
| ENSMUSG00000103585 | Pcdhgb4    | 93701     | brown     |
| ENSMUSG00000098908 | NA         | NA        | pink      |
| ENSMUSG00000017390 | Aldoc      | 11676     | red       |
| ENSMUSG00000095123 | NA         | NA        | yellow    |
| ENSMUSG00000038831 | Ralgps1    | 241308    | turquoise |
| ENSMUSG00000052291 | NA         | NA        | turquoise |
| ENSMUSG00000028322 | Exosc3     | 66362     | salmon    |
| ENSMUSG00000035051 | Dhx57      | 106794    | turquoise |
| ENSMUSG00000038836 | Agbl3      | 76223     | turquoise |
| ENSMUSG00000052293 | Taf9       | 108143    | turquoise |
| ENSMUSG00000073733 | Rsg1       | 76166     | turquoise |
| ENSMUSG00000038838 | Vars2      | 68915     | blue      |
| ENSMUSG00000052296 | Ppp6r1     | 243819    | cyan      |
| ENSMUSG00000006931 | P3h4       | 66180     | turquoise |
| ENSMUSG00000073737 | NA         | NA        | turquoise |
| ENSMUSG00000052298 | Cdc42se2   | 72729     | red       |
| ENSMUSG00000006932 | Ctnnb1     | 12387     | red       |
| ENSMUSG00000028329 | Xpa        | 22590     | turquoise |
| ENSMUSG00000052299 | Ltn1       | 78913     | blue      |
| ENSMUSG00000013662 | Atad1      | 67979     | turquoise |
| ENSMUSG00000020390 | Ube2b      | 22210     | turquoise |
| ENSMUSG00000013663 | Pten       | 19211     | turquoise |
| ENSMUSG00000020392 | Cdkn2aipnl | 52626     | black     |
| ENSMUSG00000063229 | Ldha       | 16828     | brown     |
| ENSMUSG00000020393 | Kremen1    | 84035     | turquoise |
| ENSMUSG00000031320 | Rps4x      | 20102     | black     |
| ENSMUSG00000003153 | Slc2a3     | 20527     | brown     |
| ENSMUSG00000020397 | Med7       | 66213     | brown     |
| ENSMUSG00000031327 | Chic1      | 12212     | turquoise |
| ENSMUSG00000031328 | Flna       | 192176    | blue      |
| ENSMUSG00000066771 | NA         | NA        | pink      |
| ENSMUSG00000049532 | Sall2      | 50524     | turquoise |
| ENSMUSG00000056260 | Lrif1      | 321000    | turquoise |
| ENSMUSG00000094942 | Gm3604     | 100041979 | turquoise |
| ENSMUSG00000028093 | Acp6       | 66659     | turquoise |
| ENSMUSG00000049536 | NA         | NA        | turquoise |
| ENSMUSG00000028096 | NA         | NA        | brown     |
| ENSMUSG00000028098 | Rnf115     | 67845     | turquoise |
| ENSMUSG00000056267 | Cep70      | 68121     | brown     |
| ENSMUSG00000028099 | Polr3c     | 74414     | blue      |
| ENSMUSG00000056268 | Dennd1b    | 329260    | brown     |
| ENSMUSG00000017631 | Abr        | 109934    | green     |
| ENSMUSG00000024360 | Etf1       | 225363    | red       |
| ENSMUSG00000031090 | Nadsyn1    | 78914     | turquoise |
| ENSMUSG00000034875 | Nudt19     | 110959    | turquoise |
| ENSMUSG00000052533 | Nup188     | 227699    | blue      |
| ENSMUSG00000031093 | Dock11     | 75974     | turquoise |
| ENSMUSG00000052534 | Pbx1       | 18514     | blue      |

|                    |           |        |              |
|--------------------|-----------|--------|--------------|
| ENSMUSG00000017639 | Rab11fip4 | 268451 | turquoise    |
| ENSMUSG00000031095 | NA        | NA     | turquoise    |
| ENSMUSG00000024369 | Nelfe     | 27632  | red          |
| ENSMUSG00000052539 | Magi3     | 99470  | turquoise    |
| ENSMUSG00000020630 | Rnaseh1   | 19819  | blue         |
| ENSMUSG00000080708 | NA        | NA     | blue         |
| ENSMUSG00000042029 | Ncapg2    | 76044  | magenta      |
| ENSMUSG00000020634 | Ubxn2a    | 217379 | brown        |
| ENSMUSG00000020638 | Cmpk2     | 22169  | turquoise    |
| ENSMUSG00000020639 | Pfn4      | 382562 | turquoise    |
| ENSMUSG00000098912 | NA        | NA     | brown        |
| ENSMUSG00000103591 | NA        | NA     | turquoise    |
| ENSMUSG00000098915 | NA        | NA     | black        |
| ENSMUSG00000028330 | Ncbp1     | 433702 | magenta      |
| ENSMUSG00000038845 | Phb       | 18673  | blue         |
| ENSMUSG00000028333 | NA        | NA     | red          |
| ENSMUSG00000095139 | Pou3f2    | 18992  | green        |
| ENSMUSG00000035062 | Zc4h2     | 245522 | turquoise    |
| ENSMUSG00000038848 | Ythdf1    | 228994 | blue         |
| ENSMUSG00000045576 | St7l      | 229681 | blue         |
| ENSMUSG00000035064 | Eef2k     | 13631  | brown        |
| ENSMUSG00000091401 | NA        | NA     | turquoise    |
| ENSMUSG00000006941 | Eif1b     | 68969  | black        |
| ENSMUSG00000035067 | Xkr6      | 219149 | yellow       |
| ENSMUSG00000063235 | NA        | NA     | blue         |
| ENSMUSG00000063236 | NA        | NA     | green        |
| ENSMUSG00000041840 | Haus1     | 225745 | green        |
| ENSMUSG00000035069 | Oma1      | 67013  | turquoise    |
| ENSMUSG00000041841 | Rpl37     | 67281  | black        |
| ENSMUSG00000003161 | Sri       | 109552 | turquoise    |
| ENSMUSG00000091408 | NA        | NA     | pink         |
| ENSMUSG00000024603 | Dctn4     | 67665  | brown        |
| ENSMUSG00000024604 | Rbm22     | 66810  | green        |
| ENSMUSG00000041846 | Smek1     | 68734  | red          |
| ENSMUSG00000031333 | Abcb7     | 11306  | salmon       |
| ENSMUSG00000003166 | Dgcr2     | 13356  | blue         |
| ENSMUSG00000024608 | Rps14     | 20044  | black        |
| ENSMUSG00000107560 | NA        | NA     | turquoise    |
| ENSMUSG00000099104 | NA        | NA     | tan          |
| ENSMUSG00000039031 | Arhgap18  | 73910  | turquoise    |
| ENSMUSG00000094955 | NA        | NA     | black        |
| ENSMUSG00000039033 | Tasp1     | 75812  | blue         |
| ENSMUSG00000103831 | NA        | NA     | turquoise    |
| ENSMUSG00000034880 | Mrpl34    | 94065  | blue         |
| ENSMUSG00000039037 | NA        | NA     | turquoise    |
| ENSMUSG00000024370 | Cdc23     | 52563  | red          |
| ENSMUSG00000103839 | NA        | NA     | cyan         |
| ENSMUSG00000045813 | NA        | NA     | pink         |
| ENSMUSG00000080711 | NA        | NA     | pink         |
| ENSMUSG00000024376 | Epb4114a  | 13824  | turquoise    |
| ENSMUSG00000034889 | Cactin    | 70312  | brown        |
| ENSMUSG00000052544 | NA        | NA     | turquoise    |
| ENSMUSG00000045817 | Zfp36l2   | 12193  | midnightblue |
| ENSMUSG00000042032 | Mat2b     | 108645 | green        |

|                    |               |        |           |
|--------------------|---------------|--------|-----------|
| ENSMUSG00000024378 | NA            | NA     | turquoise |
| ENSMUSG00000002981 | Clptm1        | 56457  | turquoise |
| ENSMUSG00000080715 | NA            | NA     | pink      |
| ENSMUSG00000002983 | Relb          | 19698  | pink      |
| ENSMUSG00000042035 | Igsf3         | 78908  | turquoise |
| ENSMUSG00000080717 | NA            | NA     | turquoise |
| ENSMUSG00000002984 | Tomm40        | 53333  | blue      |
| ENSMUSG00000020640 | Itsn2         | 20403  | turquoise |
| ENSMUSG00000002985 | Apoe          | 11816  | red       |
| ENSMUSG00000080718 | NA            | NA     | pink      |
| ENSMUSG00000020642 | Rnf144a       | 108089 | turquoise |
| ENSMUSG00000003402 | Prksh         | 19089  | turquoise |
| ENSMUSG00000020644 | Id2           | 15902  | purple    |
| ENSMUSG00000020646 | Mboat2        | 67216  | blue      |
| ENSMUSG00000020647 | Ncoa1         | 17977  | turquoise |
| ENSMUSG00000020648 | Dus4l         | 71916  | red       |
| ENSMUSG00000020649 | Rrm2          | 20135  | salmon    |
| ENSMUSG00000098923 | Tmem185b      | 226351 | turquoise |
| ENSMUSG00000028343 | Erp44         | 76299  | turquoise |
| ENSMUSG00000028344 | Invs          | 16348  | turquoise |
| ENSMUSG00000028345 | Tex10         | 269536 | green     |
| ENSMUSG00000104027 | NA            | NA     | pink      |
| ENSMUSG00000073755 | 5730409E04Rik | 230757 | turquoise |
| ENSMUSG00000056515 | Rab31         | 106572 | yellow    |
| ENSMUSG00000028347 | Tmeff1        | 230157 | cyan      |
| ENSMUSG00000035078 | Mtmr9         | 210376 | turquoise |
| ENSMUSG00000041852 | Tcf20         | 21411  | turquoise |
| ENSMUSG00000024613 | Tcof1         | 21453  | black     |
| ENSMUSG00000091419 | NA            | NA     | lightcyan |
| ENSMUSG00000024614 | Tmx3          | 67988  | turquoise |
| ENSMUSG00000031342 | Gpm6b         | 14758  | red       |
| ENSMUSG00000041859 | Mcm3          | 17215  | salmon    |
| ENSMUSG00000031347 | Cetn2         | 26370  | green     |
| ENSMUSG00000031349 | Nsdhl         | 18194  | yellow    |
| ENSMUSG00000049550 | Clip1         | 56430  | turquoise |
| ENSMUSG00000107577 | NA            | NA     | yellow    |
| ENSMUSG00000049553 | Polr1a        | 20019  | pink      |
| ENSMUSG00000039041 | Adrm1         | 56436  | green     |
| ENSMUSG00000039043 | Arpin         | 70420  | turquoise |
| ENSMUSG00000067212 | H2-T23        | 15040  | brown     |
| ENSMUSG00000066798 | Zbtb6         | 241322 | blue      |
| ENSMUSG00000091183 | Gm5141        | 380850 | turquoise |
| ENSMUSG00000039046 | Usp6nl        | 98910  | pink      |
| ENSMUSG00000039047 | Pigk          | 329777 | yellow    |
| ENSMUSG00000103845 | NA            | NA     | blue      |
| ENSMUSG00000034892 | Rps29         | 20090  | black     |
| ENSMUSG00000039048 | Foxred1       | 235169 | turquoise |
| ENSMUSG00000103847 | NA            | NA     | turquoise |
| ENSMUSG00000034893 | Cog3          | 338337 | turquoise |
| ENSMUSG00000024381 | Bin1          | 30948  | blue      |
| ENSMUSG00000103848 | NA            | NA     | turquoise |
| ENSMUSG00000024382 | Ercc3         | 13872  | blue      |
| ENSMUSG00000024383 | Map3k2        | 26405  | turquoise |
| ENSMUSG00000024384 | Iws1          | 73473  | green     |

|                    |               |           |              |
|--------------------|---------------|-----------|--------------|
| ENSMUSG00000035311 | Gnptab        | 432486    | blue         |
| ENSMUSG00000024387 | Csnk2b        | 13001     | black        |
| ENSMUSG00000042042 | Csgalnact2    | 78752     | brown        |
| ENSMUSG00000042043 | Tbca          | 21371     | green        |
| ENSMUSG00000052557 | Gan           | 209239    | turquoise    |
| ENSMUSG00000042046 | Dstyk         | 213452    | turquoise    |
| ENSMUSG00000013921 | Clip3         | 76686     | brown        |
| ENSMUSG00000080727 | C920021L13Rif | 100042889 | turquoise    |
| ENSMUSG00000020650 | Bcap29        | 12033     | blue         |
| ENSMUSG00000002996 | Hbp1          | 73389     | turquoise    |
| ENSMUSG00000003410 | Elavl3        | 15571     | cyan         |
| ENSMUSG00000002997 | Prkar2b       | 19088     | blue         |
| ENSMUSG00000020652 | Cenpo         | 52504     | blue         |
| ENSMUSG00000020653 | Klf11         | 194655    | green        |
| ENSMUSG00000020654 | Adcy3         | 104111    | yellow       |
| ENSMUSG00000020657 | Dnajc27       | 217378    | turquoise    |
| ENSMUSG00000020658 | Efr3b         | 668212    | turquoise    |
| ENSMUSG00000020659 | Cbll1         | 104836    | blue         |
| ENSMUSG00000077493 | NA            | NA        | brown        |
| ENSMUSG00000038861 | Pi4kb         | 107650    | turquoise    |
| ENSMUSG00000104030 | NA            | NA        | yellow       |
| ENSMUSG00000045594 | Glb1          | 12091     | turquoise    |
| ENSMUSG00000038866 | Zcchc2        | 227449    | turquoise    |
| ENSMUSG00000095159 | NA            | NA        | blue         |
| ENSMUSG00000028354 | Fmn2          | 54418     | turquoise    |
| ENSMUSG00000046010 | NA            | NA        | green        |
| ENSMUSG00000063253 | Scoc          | 56367     | brown        |
| ENSMUSG00000045598 | Zfp553        | 233887    | blue         |
| ENSMUSG00000091421 | NA            | NA        | midnightblue |
| ENSMUSG00000035086 | NA            | NA        | blue         |
| ENSMUSG00000024620 | Pdgfrb        | 18596     | purple       |
| ENSMUSG00000024622 | Hmgxb3        | 106894    | turquoise    |
| ENSMUSG00000031352 | Hccs          | 15159     | green        |
| ENSMUSG00000003184 | Irf3          | 54131     | turquoise    |
| ENSMUSG00000031353 | Rbbp7         | 245688    | black        |
| ENSMUSG00000013698 | Pea15a        | 18611     | pink         |
| ENSMUSG00000031357 | Syap1         | 67043     | yellow       |
| ENSMUSG00000031358 | NA            | NA        | green        |
| ENSMUSG00000039050 | Osbpl2        | 228983    | blue         |
| ENSMUSG00000094973 | Gm8994        | 668137    | lightcyan    |
| ENSMUSG00000103851 | NA            | NA        | brown        |
| ENSMUSG00000067224 | NA            | NA        | turquoise    |
| ENSMUSG00000024392 | Bag6          | 224727    | blue         |
| ENSMUSG00000017664 | Slc35c2       | 228875    | blue         |
| ENSMUSG00000024393 | Prrc2a        | 53761     | black        |
| ENSMUSG00000080731 | NA            | NA        | turquoise    |
| ENSMUSG00000042050 | Wdr60         | 217935    | turquoise    |
| ENSMUSG00000017667 | NA            | NA        | turquoise    |
| ENSMUSG00000100078 | NA            | NA        | black        |
| ENSMUSG00000035325 | Sec31a        | 69162     | brown        |
| ENSMUSG00000042055 | Wdr11         | 207425    | blue         |
| ENSMUSG00000035329 | Fbxo33        | 70611     | turquoise    |
| ENSMUSG00000020661 | Dnmt3a        | 13435     | turquoise    |
| ENSMUSG00000003421 | Nosip         | 66394     | turquoise    |



|                     |               |           |              |
|---------------------|---------------|-----------|--------------|
| ENSMUSG00000020664  | Did           | 13382     | turquoise    |
| ENSMUSG00000003423  | Pih1d1        | 68845     | magenta      |
| ENSMUSG00000020668  | Kif3c         | 16570     | turquoise    |
| ENSMUSG00000020669  | Sh3yl1        | 24057     | turquoise    |
| ENSMUSG00000003429  | Rps11         | 27207     | black        |
| ENSMUSG000000038871 | Bpgm          | 12183     | turquoise    |
| ENSMUSG000000038872 | Zfhx3         | 11906     | turquoise    |
| ENSMUSG000000049800 | Sertad2       | 58172     | brown        |
| ENSMUSG000000104043 | NA            | NA        | turquoise    |
| ENSMUSG000000095168 | NA            | NA        | blue         |
| ENSMUSG000000038876 | Rnf146        | 68031     | blue         |
| ENSMUSG000000056531 | Ccdc18        | 73254     | turquoise    |
| ENSMUSG000000049804 | Armcx4        | 100503043 | brown        |
| ENSMUSG000000035093 | Secisbp2l     | 70354     | turquoise    |
| ENSMUSG000000046020 | Pofut1        | 140484    | turquoise    |
| ENSMUSG000000073775 | Kti12         | 100087    | pink         |
| ENSMUSG000000049807 | Arhgap23      | 58996     | turquoise    |
| ENSMUSG000000028367 | Txn1          | 22166     | black        |
| ENSMUSG000000056536 | Pign          | 27392     | turquoise    |
| ENSMUSG000000056537 | Rlim          | 19820     | black        |
| ENSMUSG000000003190 | Bcl2l12       | 75736     | red          |
| ENSMUSG000000046027 | Stard5        | 170460    | turquoise    |
| ENSMUSG000000031360 | Ctps2         | 55936     | turquoise    |
| ENSMUSG000000031365 | Zfp275        | 27081     | blue         |
| ENSMUSG000000100319 | NA            | NA        | greenyellow  |
| ENSMUSG000000003198 | Zfp959        | 224893    | blue         |
| ENSMUSG000000041879 | Ipo9          | 226432    | blue         |
| ENSMUSG000000024639 | Gnaq          | 14682     | turquoise    |
| ENSMUSG000000003199 | Mpnd          | 68047     | green        |
| ENSMUSG000000031367 | Ap1s2         | 108012    | turquoise    |
| ENSMUSG000000020900 | Myh10         | 77579     | red          |
| ENSMUSG000000107591 | NA            | NA        | tan          |
| ENSMUSG000000020903 | Stx8          | 55943     | brown        |
| ENSMUSG000000107596 | NA            | NA        | pink         |
| ENSMUSG000000103861 | NA            | NA        | brown        |
| ENSMUSG000000039065 | Fam173b       | 68073     | grey60       |
| ENSMUSG000000094989 | NA            | NA        | black        |
| ENSMUSG000000039067 | Psmc7         | 17463     | blue         |
| ENSMUSG000000095403 | NA            | NA        | turquoise    |
| ENSMUSG000000017670 | Elmo2         | 140579    | yellow       |
| ENSMUSG000000039068 | Zzz3          | 108946    | blue         |
| ENSMUSG000000039069 | Mtg2          | 52856     | turquoise    |
| ENSMUSG000000103867 | NA            | NA        | turquoise    |
| ENSMUSG000000095406 | NA            | NA        | lightcyan    |
| ENSMUSG000000095407 | Tmem200c      | 622645    | midnightblue |
| ENSMUSG000000028601 | Echdc2        | 52430     | yellow       |
| ENSMUSG000000028603 | Scp2          | 20280     | yellow       |
| ENSMUSG000000017677 | Wsb1          | 78889     | turquoise    |
| ENSMUSG000000017679 | Ttpal         | 76080     | salmon       |
| ENSMUSG000000042063 | Zfp386        | 56220     | yellow       |
| ENSMUSG000000028607 | Cpt2          | 12896     | blue         |
| ENSMUSG000000028608 | 0610037L13Rik | 74098     | black        |
| ENSMUSG000000035337 | Uchl4         | 93841     | brown        |
| ENSMUSG000000028609 | Magoh         | 17149     | green        |

|                     |               |        |             |
|---------------------|---------------|--------|-------------|
| ENSMUSG00000080746  | NA            | NA     | brown       |
| ENSMUSG00000042066  | Tmcc2         | 68875  | cyan        |
| ENSMUSG00000080747  | NA            | NA     | turquoise   |
| ENSMUSG00000020671  | Rab10         | 19325  | turquoise   |
| ENSMUSG00000031600  | Vps37a        | 52348  | blue        |
| ENSMUSG00000020674  | Pxdn          | 69675  | turquoise   |
| ENSMUSG00000031601  | Cnot7         | 18983  | brown       |
| ENSMUSG00000003435  | Supt5         | 20924  | brown       |
| ENSMUSG00000020677  | Ddx52         | 78394  | blue        |
| ENSMUSG000000031604 | Msmo1         | 66234  | purple      |
| ENSMUSG00000003436  | Dll3          | 13389  | red         |
| ENSMUSG00000031605  | Klhl2         | 77113  | blue        |
| ENSMUSG00000003437  | Paf1          | 54624  | blue        |
| ENSMUSG00000003438  | NA            | NA     | red         |
| ENSMUSG00000031608  | Galnt7        | 108150 | turquoise   |
| ENSMUSG00000031609  | Sap30         | 60406  | red         |
| ENSMUSG00000038880  | Mrps34        | 79044  | turquoise   |
| ENSMUSG00000038884  | A230050P20Ril | 319278 | turquoise   |
| ENSMUSG00000038886  | Man2a2        | 140481 | turquoise   |
| ENSMUSG00000046032  | Snx12         | 55988  | blue        |
| ENSMUSG00000063273  | Naa15         | 74838  | red         |
| ENSMUSG00000046034  | Otulin        | 432940 | brown       |
| ENSMUSG00000063275  | Hacd1         | 30963  | turquoise   |
| ENSMUSG00000039307  | Hexdc         | 238023 | turquoise   |
| ENSMUSG00000039308  | Ndst2         | 17423  | turquoise   |
| ENSMUSG00000024640  | Psat1         | 107272 | grey60      |
| ENSMUSG00000041881  | Ndufa7        | 66416  | green       |
| ENSMUSG00000024642  | Tle4          | 21888  | yellow      |
| ENSMUSG00000031370  | Zrsr2         | 22184  | red         |
| ENSMUSG00000091449  | NA            | NA     | black       |
| ENSMUSG00000031371  | Haus7         | 73738  | turquoise   |
| ENSMUSG00000024644  | Cndp2         | 66054  | turquoise   |
| ENSMUSG00000052812  | NA            | NA     | turquoise   |
| ENSMUSG00000024645  | Timm21        | 67105  | turquoise   |
| ENSMUSG00000024646  | NA            | NA     | greenyellow |
| ENSMUSG00000042302  | Ehbp1         | 216565 | green       |
| ENSMUSG00000041889  | Shisa4        | 77552  | purple      |
| ENSMUSG00000031378  | Abcd1         | 11666  | turquoise   |
| ENSMUSG00000042305  | Tmem183a      | 57439  | brown       |
| ENSMUSG00000020910  | Adprm         | 66358  | turquoise   |
| ENSMUSG00000042308  | Setd1a        | 233904 | blue        |
| ENSMUSG00000020914  | Top2a         | 21973  | magenta     |
| ENSMUSG00000020917  | Acly          | 104112 | turquoise   |
| ENSMUSG00000049580  | Tsku          | 244152 | turquoise   |
| ENSMUSG00000020918  | Kat2a         | 14534  | blue        |
| ENSMUSG00000020919  | Stat5b        | 20851  | turquoise   |
| ENSMUSG00000010406  | Mrpl52        | 68836  | blue        |
| ENSMUSG00000067242  | NA            | NA     | yellow      |
| ENSMUSG00000095419  | NA            | NA     | turquoise   |
| ENSMUSG00000017686  | Rhot1         | 59040  | yellow      |
| ENSMUSG00000028613  | Lrp8          | 16975  | blue        |
| ENSMUSG00000045854  | NA            | NA     | turquoise   |
| ENSMUSG00000035342  | Lzts2         | 226154 | turquoise   |
| ENSMUSG00000028614  | Ndc1          | 72787  | brown       |

|                     |               |    |        |           |
|---------------------|---------------|----|--------|-----------|
| ENSMUSG00000018102  | Hist1h2bc     |    | 68024  | blue      |
| ENSMUSG00000063511  | Snrnp70       |    | 20637  | green     |
| ENSMUSG00000042073  | Abhd14b       |    | 76491  | blue      |
| ENSMUSG00000028617  | Lrrc42        |    | 77809  | turquoise |
| ENSMUSG00000063514  | Gm6756        |    | 627427 | tan       |
| ENSMUSG00000028618  | Tmem59        |    | 56374  | black     |
| ENSMUSG00000028619  | Tceanc2       |    | 66526  | green     |
| ENSMUSG00000020680  | Taf15         |    | 70439  | blue      |
| ENSMUSG00000053004  | Hrh1          |    | 15465  | purple    |
| ENSMUSG00000042079  | Hnrnpf        |    | 98758  | black     |
| ENSMUSG00000031610  | Scrg1         |    | 20284  | purple    |
| ENSMUSG00000053007  | 9430076C15Rik |    | 320189 | turquoise |
| ENSMUSG00000003444  | NA            | NA |        | blue      |
| ENSMUSG00000020687  | Cdc27         |    | 217232 | red       |
| ENSMUSG00000021102  | Glrx5         |    | 73046  | red       |
| ENSMUSG00000010175  | Prox1         |    | 19130  | cyan      |
| ENSMUSG00000021103  | Mnat1         |    | 17420  | blue      |
| ENSMUSG00000031617  | Tmem184c      |    | 234463 | turquoise |
| ENSMUSG00000031618  | Nr3c2         |    | 110784 | purple    |
| ENSMUSG00000021109  | Hif1a         |    | 15251  | yellow    |
| ENSMUSG000000104060 | NA            | NA |        | turquoise |
| ENSMUSG00000038893  | Fam117a       |    | 215512 | turquoise |
| ENSMUSG000000104063 | Pcdhgb7       |    | 93704  | turquoise |
| ENSMUSG00000038894  | Irs2          |    | 384783 | blue      |
| ENSMUSG00000028381  | Ugcg          |    | 22234  | turquoise |
| ENSMUSG00000038895  | Zfp653        |    | 319601 | turquoise |
| ENSMUSG00000028382  | Ptbp3         |    | 230257 | blue      |
| ENSMUSG00000073791  | NA            | NA |        | blue      |
| ENSMUSG00000028383  | Hsd12         |    | 72479  | yellow    |
| ENSMUSG00000073792  | Alg6          |    | 320438 | turquoise |
| ENSMUSG00000063281  | Zfp35         |    | 22694  | blue      |
| ENSMUSG00000028385  | Snx30         |    | 209131 | turquoise |
| ENSMUSG00000074211  | NA            | NA |        | blue      |
| ENSMUSG00000074212  | Dnajb14       |    | 70604  | turquoise |
| ENSMUSG00000041890  | Git2          |    | 26431  | turquoise |
| ENSMUSG00000039318  | Rab3gap2      |    | 98732  | turquoise |
| ENSMUSG00000041891  | Lman1         |    | 70361  | turquoise |
| ENSMUSG00000007411  | Mark3         |    | 17169  | blue      |
| ENSMUSG00000006998  | Psmc2         |    | 21762  | blue      |
| ENSMUSG00000031381  | Piga          |    | 18700  | green     |
| ENSMUSG00000024654  | NA            | NA |        | yellow    |
| ENSMUSG00000041895  | Wipi1         |    | 52639  | turquoise |
| ENSMUSG00000074219  | NA            | NA |        | yellow    |
| ENSMUSG00000007415  | Gatad1        |    | 67210  | blue      |
| ENSMUSG00000052825  | NA            | NA |        | green     |
| ENSMUSG00000017929  | B4galt5       |    | 56336  | brown     |
| ENSMUSG00000042312  | S100a13       |    | 20196  | red       |
| ENSMUSG00000031386  | Hcfc1         |    | 15161  | pink      |
| ENSMUSG00000031388  | Naa10         |    | 56292  | black     |
| ENSMUSG00000020921  | Tmem101       |    | 76547  | turquoise |
| ENSMUSG00000020922  | NA            | NA |        | brown     |
| ENSMUSG00000020923  | Ubtf          |    | 21429  | red       |
| ENSMUSG00000020925  | Ccdc43        |    | 52715  | brown     |
| ENSMUSG00000020926  | Adam11        |    | 11488  | turquoise |

|                    |         |           |           |
|--------------------|---------|-----------|-----------|
| ENSMUSG00000020929 | Eftud2  | 20624     | red       |
| ENSMUSG00000103880 | NA      | NA        | pink      |
| ENSMUSG00000039086 | Ss18l1  | 269397    | brown     |
| ENSMUSG00000039087 | Rreb1   | 68750     | turquoise |
| ENSMUSG00000017692 | Rhbdl3  | 246104    | turquoise |
| ENSMUSG00000039089 | L3mbtl3 | 237339    | turquoise |
| ENSMUSG00000103887 | NA      | NA        | pink      |
| ENSMUSG00000095427 | NA      | NA        | red       |
| ENSMUSG00000028621 | Cyb5rl  | 230582    | turquoise |
| ENSMUSG00000028622 | Mrpl37  | 56280     | yellow    |
| ENSMUSG00000035351 | Nup37   | 69736     | blue      |
| ENSMUSG00000052593 | Adam17  | 11491     | turquoise |
| ENSMUSG00000042082 | Arsb    | 11881     | turquoise |
| ENSMUSG00000045867 | Cradd   | 12905     | turquoise |
| ENSMUSG00000035354 | Uvrag   | 78610     | brown     |
| ENSMUSG00000104309 | NA      | NA        | pink      |
| ENSMUSG00000063524 | Eno1    | 13806     | purple    |
| ENSMUSG00000028629 | Exo5    | 73172     | turquoise |
| ENSMUSG00000035357 | Pdzrn3  | 55983     | turquoise |
| ENSMUSG00000053012 | Krcc1   | 57896     | brown     |
| ENSMUSG00000020691 | NA      | NA        | blue      |
| ENSMUSG00000003452 | Bicd1   | 12121     | brown     |
| ENSMUSG00000020694 | Tlk2    | 24086     | turquoise |
| ENSMUSG00000031622 | Sin3b   | 20467     | green     |
| ENSMUSG00000020696 | Rffi    | 67338     | brown     |
| ENSMUSG00000021111 | Papola  | 18789     | blue      |
| ENSMUSG00000020697 | Lig3    | 16882     | blue      |
| ENSMUSG00000021112 | Mpp5    | 56217     | blue      |
| ENSMUSG00000021113 | Snapc1  | 75627     | turquoise |
| ENSMUSG00000031626 | Sorbs2  | 234214    | turquoise |
| ENSMUSG00000003458 | Ncstn   | 59287     | blue      |
| ENSMUSG00000021114 | Atp6v1d | 73834     | turquoise |
| ENSMUSG00000031627 | Irf2    | 16363     | turquoise |
| ENSMUSG00000021115 | Vrk1    | 22367     | red       |
| ENSMUSG00000031628 | NA      | NA        | salmon    |
| ENSMUSG00000021116 | Eif2s1  | 13665     | blue      |
| ENSMUSG00000098973 | Mir6236 | 102465959 | turquoise |
| ENSMUSG00000031629 | Cenpu   | 71876     | magenta   |
| ENSMUSG00000107853 | NA      | NA        | turquoise |
| ENSMUSG00000095193 | NA      | NA        | pink      |
| ENSMUSG00000028391 | Wdr31   | 71354     | blue      |
| ENSMUSG00000049832 | NA      | NA        | blue      |
| ENSMUSG00000107859 | NA      | NA        | turquoise |
| ENSMUSG00000028393 | Alad    | 17025     | blue      |
| ENSMUSG00000028394 | NA      | NA        | red       |
| ENSMUSG00000091460 | NA      | NA        | tan       |
| ENSMUSG00000039323 | Igfbp2  | 16008     | yellow    |
| ENSMUSG00000028397 | Kdm4c   | 76804     | brown     |
| ENSMUSG00000074220 | Zfp382  | 233060    | grey60    |
| ENSMUSG00000028398 | Tmem261 | 66928     | green     |
| ENSMUSG00000028399 | Ptprd   | 19266     | yellow    |
| ENSMUSG00000039328 | Rnf122  | 68867     | pink      |
| ENSMUSG00000063297 | NA      | NA        | red       |
| ENSMUSG00000024660 | Incenp  | 16319     | magenta   |

|                    |          |        |              |
|--------------------|----------|--------|--------------|
| ENSMUSG00000024661 | Fth1     | 14319  | greenyellow  |
| ENSMUSG00000046058 | Eid2     | 386655 | lightcyan    |
| ENSMUSG00000024663 | Rab3il1  | 74760  | turquoise    |
| ENSMUSG00000024664 | Fads3    | 60527  | turquoise    |
| ENSMUSG00000031392 | Irak1    | 16179  | turquoise    |
| ENSMUSG00000024665 | Fads2    | 56473  | greenyellow  |
| ENSMUSG00000031393 | Mecp2    | 17257  | turquoise    |
| ENSMUSG00000052833 | Sae1     | 56459  | red          |
| ENSMUSG00000100347 | NA       | NA     | turquoise    |
| ENSMUSG00000024666 | Tmem138  | 72982  | turquoise    |
| ENSMUSG00000024668 | Sdhaf2   | 66072  | turquoise    |
| ENSMUSG00000042323 | Pbrm1    | 66923  | red          |
| ENSMUSG00000031398 | Plxna3   | 18846  | turquoise    |
| ENSMUSG00000031399 | Fam3a    | 66294  | yellow       |
| ENSMUSG00000042328 | Hps4     | 192232 | brown        |
| ENSMUSG00000020935 | Dcakd    | 68087  | red          |
| ENSMUSG00000020936 | Nmt1     | 18107  | brown        |
| ENSMUSG00000108042 | NA       | NA     | yellow       |
| ENSMUSG00000108045 | NA       | NA     | blue         |
| ENSMUSG00000095432 | Zfp748   | 212276 | turquoise    |
| ENSMUSG00000028630 | Dyrk2    | 69181  | turquoise    |
| ENSMUSG00000028631 | Kcnq4    | 60613  | turquoise    |
| ENSMUSG00000103899 | NA       | NA     | pink         |
| ENSMUSG00000028633 | Ctps     | 51797  | red          |
| ENSMUSG00000045875 | Adra1a   | 11549  | turquoise    |
| ENSMUSG00000028634 | Hivep3   | 16656  | yellow       |
| ENSMUSG00000028636 | Ppcs     | 106564 | turquoise    |
| ENSMUSG00000080775 | NA       | NA     | lightcyan    |
| ENSMUSG00000035367 | Rmi1     | 74386  | blue         |
| ENSMUSG00000080776 | Gm12174  | 620678 | black        |
| ENSMUSG00000028639 | Ybx1     | 22608  | black        |
| ENSMUSG00000080777 | NA       | NA     | lightcyan    |
| ENSMUSG00000042097 | Zfp239   | 22685  | blue         |
| ENSMUSG00000053024 | NA       | NA     | yellow       |
| ENSMUSG00000024900 | Cpt1a    | 12894  | turquoise    |
| ENSMUSG00000080779 | NA       | NA     | tan          |
| ENSMUSG00000013973 | Dedd     | 21945  | yellow       |
| ENSMUSG00000042099 | Kank3    | 80880  | salmon       |
| ENSMUSG00000024902 | Mrpl11   | 66419  | brown        |
| ENSMUSG00000031631 | Cfap97   | 66756  | brown        |
| ENSMUSG00000003464 | Pex19    | 19298  | blue         |
| ENSMUSG00000021120 | Pigh     | 110417 | brown        |
| ENSMUSG00000031633 | NA       | NA     | turquoise    |
| ENSMUSG00000024906 | Mus81    | 71711  | turquoise    |
| ENSMUSG00000031634 | Ufsp2    | 192169 | turquoise    |
| ENSMUSG00000024908 | Ppp6r3   | 52036  | blue         |
| ENSMUSG00000024909 | Efemp2   | 58859  | turquoise    |
| ENSMUSG00000021124 | Vti1b    | 53612  | blue         |
| ENSMUSG00000031639 | Tlr3     | 142980 | purple       |
| ENSMUSG00000021127 | Zfp36l1  | 12192  | midnightblue |
| ENSMUSG00000098985 | NA       | NA     | blue         |
| ENSMUSG00000107863 | NA       | NA     | tan          |
| ENSMUSG00000104083 | NA       | NA     | turquoise    |
| ENSMUSG00000046062 | Ppp1r15b | 108954 | turquoise    |

|                    |               |           |           |
|--------------------|---------------|-----------|-----------|
| ENSMUSG00000091474 | NA            | NA        | brown     |
| ENSMUSG00000091475 | 2810468N07Rik | 72834     | turquoise |
| ENSMUSG00000056579 | Tug1          | 544752    | turquoise |
| ENSMUSG00000017943 | Gdap111       | 228858    | blue      |
| ENSMUSG00000074236 | NA            | NA        | turquoise |
| ENSMUSG00000091478 | NA            | NA        | green     |
| ENSMUSG00000074238 | Ap1ar         | 211556    | turquoise |
| ENSMUSG00000035601 | Trmt10b       | 69934     | blue      |
| ENSMUSG00000042331 | Specc1        | 432572    | yellow    |
| ENSMUSG00000020941 | Map3k14       | 53859     | brown     |
| ENSMUSG00000070509 | Rgma          | 244058    | yellow    |
| ENSMUSG00000020946 | Gosr2         | 56494     | blue      |
| ENSMUSG00000020948 | Klhl28        | 66689     | turquoise |
| ENSMUSG00000020949 | Fkbp3         | 30795     | green     |
| ENSMUSG00000078201 | Tmem203       | 227615    | turquoise |
| ENSMUSG00000067274 | Rplp0         | 11837     | black     |
| ENSMUSG00000078202 | Nrarp         | 67122     | blue      |
| ENSMUSG00000067279 | Ppp1r3c       | 53412     | blue      |
| ENSMUSG00000028641 | P3h1          | 56401     | grey60    |
| ENSMUSG00000035370 | Adat3         | 100113398 | turquoise |
| ENSMUSG00000028643 | Svbp          | 69216     | turquoise |
| ENSMUSG00000035372 | 1810055G02Rik | 72056     | turquoise |
| ENSMUSG00000045886 | NA            | NA        | blue      |
| ENSMUSG00000028645 | NA            | NA        | turquoise |
| ENSMUSG00000028646 | Rragc         | 54170     | turquoise |
| ENSMUSG00000063543 | NA            | NA        | black     |
| ENSMUSG00000028647 | Mycbp         | 56309     | brown     |
| ENSMUSG00000070271 | NA            | NA        | tan       |
| ENSMUSG00000035376 | Hacd2         | 70757     | purple    |
| ENSMUSG00000028648 | Ndufs5        | 595136    | yellow    |
| ENSMUSG00000028649 | Macf1         | 11426     | yellow    |
| ENSMUSG00000081201 | NA            | NA        | yellow    |
| ENSMUSG00000024911 | Fibp          | 58249     | turquoise |
| ENSMUSG00000024913 | Lrp5          | 16973     | turquoise |
| ENSMUSG00000031641 | Cbr4          | 234309    | turquoise |
| ENSMUSG00000053038 | NA            | NA        | tan       |
| ENSMUSG00000024914 | Drap1         | 66556     | blue      |
| ENSMUSG00000031642 | Sh3rf1        | 59009     | turquoise |
| ENSMUSG00000021130 | Galnt16       | 108760    | yellow    |
| ENSMUSG00000081208 | NA            | NA        | blue      |
| ENSMUSG00000014402 | Tsg101        | 22088     | green     |
| ENSMUSG00000021131 | NA            | NA        | red       |
| ENSMUSG00000031644 | Nek1          | 18004     | turquoise |
| ENSMUSG00000021133 | Susd6         | 217684    | blue      |
| ENSMUSG00000021134 | Srsf5         | 20384     | turquoise |
| ENSMUSG00000031647 | Mfap3l        | 71306     | yellow    |
| ENSMUSG00000021136 | Smoc1         | 64075     | turquoise |
| ENSMUSG00000021139 | NA            | NA        | blue      |
| ENSMUSG00000039345 | NA            | NA        | brown     |
| ENSMUSG00000049858 | Suox          | 211389    | brown     |
| ENSMUSG00000084755 | NA            | NA        | turquoise |
| ENSMUSG00000039347 | Atp6v0e2      | 76252     | green     |
| ENSMUSG00000100361 | NA            | NA        | lightcyan |
| ENSMUSG00000074247 | Dda1          | 66498     | blue      |

|                    |               |        |           |
|--------------------|---------------|--------|-----------|
| ENSMUSG00000046079 | Lrrc8d        | 231549 | green     |
| ENSMUSG00000024683 | Mrpl16        | 94063  | cyan      |
| ENSMUSG00000052852 | Reep1         | 52250  | brown     |
| ENSMUSG00000024687 | Osbp          | 76303  | blue      |
| ENSMUSG00000035614 | Fam179b       | 328108 | turquoise |
| ENSMUSG00000025102 | 3110040N11Rik | 67290  | brown     |
| ENSMUSG00000025103 | Btbd1         | 83962  | turquoise |
| ENSMUSG00000014177 | Tvp23b        | 67510  | yellow    |
| ENSMUSG00000025104 | Hdgfrp3       | 29877  | blue      |
| ENSMUSG00000020950 | Foxg1         | 15228  | turquoise |
| ENSMUSG00000060002 | Chpt1         | 212862 | purple    |
| ENSMUSG00000042348 | Arl15         | 218639 | red       |
| ENSMUSG00000020952 | Scfd1         | 76983  | blue      |
| ENSMUSG00000020954 | Strn3         | 94186  | turquoise |
| ENSMUSG00000020955 | Ap4s1         | 11782  | green     |
| ENSMUSG00000020956 | Dtd2          | 328092 | blue      |
| ENSMUSG00000077797 | NA            | NA     | turquoise |
| ENSMUSG00000067288 | Rps28         | 54127  | black     |
| ENSMUSG00000028651 | Ppie          | 56031  | black     |
| ENSMUSG00000056820 | Tsnax         | 53424  | black     |
| ENSMUSG00000028653 | Trit1         | 66966  | pink      |
| ENSMUSG00000035382 | Pcsk7         | 18554  | brown     |
| ENSMUSG00000063550 | Nup98         | 269966 | turquoise |
| ENSMUSG00000028654 | Mycl          | 16918  | turquoise |
| ENSMUSG00000028655 | Mfsd2a        | 76574  | purple    |
| ENSMUSG00000045896 | Paip2b        | 232164 | green     |
| ENSMUSG00000046311 | Zfp62         | 22720  | cyan      |
| ENSMUSG00000028656 | Cap1          | 12331  | turquoise |
| ENSMUSG00000028657 | Ppt1          | 19063  | turquoise |
| ENSMUSG00000046312 | AI464131      | 329828 | purple    |
| ENSMUSG00000070282 | NA            | NA     | turquoise |
| ENSMUSG00000046314 | Stxbp6        | 217517 | salmon    |
| ENSMUSG00000070283 | NA            | NA     | yellow    |
| ENSMUSG00000081210 | NA            | NA     | brown     |
| ENSMUSG00000070284 | Gmppb         | 331026 | turquoise |
| ENSMUSG00000063556 | NA            | NA     | black     |
| ENSMUSG00000063558 | Aox1          | 11761  | purple    |
| ENSMUSG00000024921 | Smarca2       | 67155  | turquoise |
| ENSMUSG00000070287 | Slc35g2       | 245020 | yellow    |
| ENSMUSG00000053046 | Brsk2         | 75770  | grey60    |
| ENSMUSG00000081214 | NA            | NA     | red       |
| ENSMUSG00000024924 | Vldlr         | 22359  | yellow    |
| ENSMUSG00000031652 | N4bp1         | 80750  | blue      |
| ENSMUSG00000013997 | Nit1          | 27045  | turquoise |
| ENSMUSG00000024925 | NA            | NA     | red       |
| ENSMUSG00000021140 | Pcnx          | 54604  | turquoise |
| ENSMUSG00000024926 | Kat5          | 81601  | turquoise |
| ENSMUSG00000024927 | Rela          | 19697  | blue      |
| ENSMUSG00000021143 | Pacs2         | 217893 | blue      |
| ENSMUSG00000021144 | Mta1          | 116870 | turquoise |
| ENSMUSG00000031657 | Heatr3        | 234549 | blue      |
| ENSMUSG00000014418 | Hps5          | 246694 | brown     |
| ENSMUSG00000021147 | Wdr37         | 207615 | blue      |
| ENSMUSG00000021149 | Gtpbp4        | 69237  | salmon    |

|                     |               |           |           |
|---------------------|---------------|-----------|-----------|
| ENSMUSG00000099423  | NA            | NA        | brown     |
| ENSMUSG00000056592  | Zfp658        | 210104    | brown     |
| ENSMUSG00000049866  | Arl4c         | 320982    | black     |
| ENSMUSG00000039354  | Smarcal1      | 54380     | turquoise |
| ENSMUSG00000039356  | Exosc2        | 227715    | red       |
| ENSMUSG00000056598  | Lrrc48        | 74665     | brown     |
| ENSMUSG00000039357  | Fut11         | 73068     | turquoise |
| ENSMUSG00000046085  | NA            | NA        | yellow    |
| ENSMUSG00000024691  | Fam111a       | 107373    | magenta   |
| ENSMUSG000000091498 | NA            | NA        | turquoise |
| ENSMUSG000000035620 | NA            | NA        | turquoise |
| ENSMUSG000000035621 | Midn          | 59090     | green     |
| ENSMUSG00000024695  | Zfp91         | 109910    | green     |
| ENSMUSG00000042350  | Arel1         | 68497     | turquoise |
| ENSMUSG000000035623 | Rsf1          | 233532    | green     |
| ENSMUSG00000070520  | NA            | NA        | blue      |
| ENSMUSG00000042354  | Gnl3          | 30877     | black     |
| ENSMUSG00000070522  | NA            | NA        | blue      |
| ENSMUSG00000007458  | M6pr          | 17113     | blue      |
| ENSMUSG000000035629 | Rubcn         | 100502698 | turquoise |
| ENSMUSG00000060012  | Kif13b        | 16554     | turquoise |
| ENSMUSG00000020961  | NA            | NA        | turquoise |
| ENSMUSG00000020962  | Gtf2a1        | 83602     | blue      |
| ENSMUSG00000042359  | Osbp16        | 99031     | pink      |
| ENSMUSG00000003721  | Insig2        | 72999     | turquoise |
| ENSMUSG00000020964  | Sel1l         | 20338     | turquoise |
| ENSMUSG00000010453  | Kansl3        | 226976    | green     |
| ENSMUSG00000060019  | NA            | NA        | black     |
| ENSMUSG00000108077  | 6330415B21Rik | 70753     | turquoise |
| ENSMUSG00000035390  | Brsk1         | 381979    | turquoise |
| ENSMUSG00000104346  | Pcdhga3       | 93711     | turquoise |
| ENSMUSG00000028664  | Ephb2         | 13844     | green     |
| ENSMUSG00000035392  | Dennd1a       | 227801    | yellow    |
| ENSMUSG00000056832  | Ttc26         | 264134    | turquoise |
| ENSMUSG000000091732 | NA            | NA        | turquoise |
| ENSMUSG00000028668  | Tceb3         | 27224     | blue      |
| ENSMUSG00000056836  | NA            | NA        | brown     |
| ENSMUSG00000046324  | NA            | NA        | turquoise |
| ENSMUSG00000035397  | Klf16         | 118445    | blue      |
| ENSMUSG00000028669  | Pithd1        | 66193     | black     |
| ENSMUSG00000081221  | NA            | NA        | turquoise |
| ENSMUSG00000035399  | Oser1         | 66680     | blue      |
| ENSMUSG00000081223  | NA            | NA        | pink      |
| ENSMUSG00000046329  | Slc25a23      | 66972     | turquoise |
| ENSMUSG00000031660  | Brd7          | 26992     | blue      |
| ENSMUSG00000031661  | Nkd1          | 93960     | black     |
| ENSMUSG00000081226  | NA            | NA        | brown     |
| ENSMUSG00000081228  | NA            | NA        | brown     |
| ENSMUSG00000024937  | Ehbp111       | 114601    | turquoise |
| ENSMUSG00000031665  | Sall1         | 58198     | blue      |
| ENSMUSG00000031666  | Rbl2          | 19651     | blue      |
| ENSMUSG00000014426  | Map3k4        | 26407     | blue      |
| ENSMUSG00000031667  | Aktip         | 14339     | turquoise |
| ENSMUSG00000031668  | Eif2ak3       | 13666     | pink      |



|                    |          |        |           |
|--------------------|----------|--------|-----------|
| ENSMUSG00000021156 | Zmynd11  | 66505  | green     |
| ENSMUSG00000031669 | Gins3    | 78833  | salmon    |
| ENSMUSG00000107891 | NA       | NA     | turquoise |
| ENSMUSG00000108314 | NA       | NA     | turquoise |
| ENSMUSG00000039361 | Picalm   | 233489 | turquoise |
| ENSMUSG00000049878 | Rif      | 109263 | turquoise |
| ENSMUSG00000039367 | Sec24c   | 218811 | turquoise |
| ENSMUSG00000046096 | BC030336 | 233812 | turquoise |
| ENSMUSG00000074264 | Amy1     | 11722  | turquoise |
| ENSMUSG00000028901 | Gmeb1    | 56809  | blue      |
| ENSMUSG00000028902 | Sf3a3    | 75062  | salmon    |
| ENSMUSG00000063800 | Prpf38a  | 230596 | red       |
| ENSMUSG00000035632 | Cnot3    | 232791 | pink      |
| ENSMUSG00000063801 | Ap3s2    | 11778  | brown     |
| ENSMUSG00000063802 | Hspbp1   | 66245  | green     |
| ENSMUSG00000014195 | Dnajc7   | 56354  | red       |
| ENSMUSG00000042363 | Lgalsl   | 216551 | yellow    |
| ENSMUSG00000028907 | NA       | NA     | green     |
| ENSMUSG00000042364 | Snx18    | 170625 | turquoise |
| ENSMUSG00000035637 | Grhpr    | 76238  | green     |
| ENSMUSG00000063808 | Gpatch1  | 67471  | turquoise |
| ENSMUSG00000042369 | Rbm45    | 241490 | turquoise |
| ENSMUSG00000003731 | Kpna6    | 16650  | blue      |
| ENSMUSG00000020973 | NA       | NA     | magenta   |
| ENSMUSG00000020974 | Pole2    | 18974  | salmon    |
| ENSMUSG00000031901 | Dus2     | 66369  | blue      |
| ENSMUSG00000031902 | Nfatc3   | 18021  | turquoise |
| ENSMUSG00000031903 | Pla2g15  | 192654 | turquoise |
| ENSMUSG00000031904 | Slc7a6   | 330836 | green     |
| ENSMUSG00000020978 | Klhdc2   | 69554  | green     |
| ENSMUSG00000031906 | Smpd3    | 58994  | turquoise |
| ENSMUSG00000031907 | Zfp90    | 22751  | yellow    |
| ENSMUSG00000028670 | Lypla2   | 26394  | black     |
| ENSMUSG00000028671 | Gale     | 74246  | turquoise |
| ENSMUSG00000095478 | NA       | NA     | purple    |
| ENSMUSG00000028672 | Hmgcl    | 15356  | turquoise |
| ENSMUSG00000018160 | Med1     | 19014  | black     |
| ENSMUSG00000028673 | Fuca1    | 71665  | brown     |
| ENSMUSG00000039601 | Rcan2    | 53901  | turquoise |
| ENSMUSG00000028675 | Pnrc2    | 52830  | brown     |
| ENSMUSG00000046330 | Rpl37a   | 19981  | black     |
| ENSMUSG00000028676 | Srsf10   | 14105  | blue      |
| ENSMUSG00000074500 | NA       | NA     | turquoise |
| ENSMUSG00000028677 | Rnf220   | 66743  | brown     |
| ENSMUSG00000091742 | NA       | NA     | grey60    |
| ENSMUSG00000074501 | NA       | NA     | turquoise |
| ENSMUSG00000028678 | Kif2c    | 73804  | magenta   |
| ENSMUSG00000053062 | Jam2     | 67374  | yellow    |
| ENSMUSG00000063576 | Klhdc3   | 71765  | red       |
| ENSMUSG00000018167 | Stard3   | 59045  | yellow    |
| ENSMUSG00000039607 | Rbms3    | 207181 | blue      |
| ENSMUSG00000081232 | NA       | NA     | turquoise |
| ENSMUSG00000024940 | Ltbp3    | 16998  | yellow    |
| ENSMUSG00000018169 | Mfng     | 17305  | red       |

|                    |               |    |           |             |
|--------------------|---------------|----|-----------|-------------|
| ENSMUSG00000074505 | Fat3          |    | 270120    | turquoise   |
| ENSMUSG00000024941 | Scyl1         |    | 78891     | blue        |
| ENSMUSG00000074506 | NA            | NA |           | turquoise   |
| ENSMUSG00000024943 | Smc5          |    | 226026    | brown       |
| ENSMUSG00000031671 | Setd6         |    | 66083     | brown       |
| ENSMUSG00000024944 | NA            | NA |           | turquoise   |
| ENSMUSG00000031672 | Got2          |    | 14719     | blue        |
| ENSMUSG00000031673 | Cdh11         |    | 12552     | yellow      |
| ENSMUSG00000081239 | NA            | NA |           | turquoise   |
| ENSMUSG00000024947 | Men1          |    | 17283     | blue        |
| ENSMUSG00000024948 | Map4k2        |    | 26412     | turquoise   |
| ENSMUSG00000024949 | Sf1           |    | 22668     | red         |
| ENSMUSG00000042605 | Atxn2         |    | 20239     | turquoise   |
| ENSMUSG00000042606 | Hirip3        |    | 233876    | salmon      |
| ENSMUSG00000042608 | Stk40         |    | 74178     | turquoise   |
| ENSMUSG00000108322 | NA            | NA |           | turquoise   |
| ENSMUSG00000049881 | 2810025M15Ril |    | 69953     | green       |
| ENSMUSG00000039375 | Wdr17         |    | 244484    | turquoise   |
| ENSMUSG00000074272 | Ceacam1       |    | 26365     | yellow      |
| ENSMUSG00000084786 | Ubl5          |    | 66177     | brown       |
| ENSMUSG00000085201 | NA            | NA |           | cyan        |
| ENSMUSG00000067547 | NA            | NA |           | blue        |
| ENSMUSG00000028910 | Mecr          |    | 26922     | green       |
| ENSMUSG00000057036 | NA            | NA |           | black       |
| ENSMUSG00000028911 | Srsf4         |    | 57317     | black       |
| ENSMUSG00000100394 | NA            | NA |           | turquoise   |
| ENSMUSG00000035640 | Cbarp         |    | 100503659 | greenyellow |
| ENSMUSG00000100396 | NA            | NA |           | turquoise   |
| ENSMUSG00000018401 | Mtmr4         |    | 170749    | turquoise   |
| ENSMUSG00000035642 | Aamdc         |    | 66273     | pink        |
| ENSMUSG00000028914 | Casp9         |    | 12371     | yellow      |
| ENSMUSG00000100397 | NA            | NA |           | turquoise   |
| ENSMUSG00000063810 | Alms1         |    | 236266    | brown       |
| ENSMUSG00000025130 | P4hb          |    | 18453     | blue        |
| ENSMUSG00000085208 | NA            | NA |           | blue        |
| ENSMUSG00000007476 | Lrrc8a        |    | 241296    | green       |
| ENSMUSG00000025132 | Arhgdia       |    | 192662    | turquoise   |
| ENSMUSG00000028917 | Plekhn2       |    | 69582     | yellow      |
| ENSMUSG00000018405 | Mrm1          |    | 217038    | turquoise   |
| ENSMUSG00000025133 | Ints4         |    | 101861    | blue        |
| ENSMUSG00000025134 | NA            | NA |           | magenta     |
| ENSMUSG00000028919 | Arhgef19      |    | 213649    | turquoise   |
| ENSMUSG00000025135 | Anapc11       |    | 66156     | green       |
| ENSMUSG00000052889 | Prkcb         |    | 18751     | blue        |
| ENSMUSG00000070544 | Top1          |    | 21969     | green       |
| ENSMUSG00000063816 | NA            | NA |           | tan         |
| ENSMUSG00000035649 | Zcchc7        |    | 319885    | turquoise   |
| ENSMUSG00000060032 | H2afj         |    | 232440    | brown       |
| ENSMUSG00000025137 | Pcyt2         |    | 68671     | turquoise   |
| ENSMUSG00000020982 | Nemf          |    | 66244     | blue        |
| ENSMUSG00000025138 | Sirt7         |    | 209011    | brown       |
| ENSMUSG00000025139 | Tollip        |    | 54473     | green       |
| ENSMUSG00000060036 | Rpl3          |    | 27367     | black       |
| ENSMUSG00000020986 | Sec23a        |    | 20334     | green       |

|                    |               |        |           |
|--------------------|---------------|--------|-----------|
| ENSMUSG00000021400 | Wrnip1        | 78903  | green     |
| ENSMUSG00000031913 | Vps4a         | 116733 | blue      |
| ENSMUSG00000060038 | Dhps          | 330817 | brown     |
| ENSMUSG00000020988 | L2hgdh        | 217666 | yellow    |
| ENSMUSG00000031916 | NA            | NA     | blue      |
| ENSMUSG00000031917 | Nip7          | 66164  | red       |
| ENSMUSG00000031918 | Mtmr2         | 77116  | blue      |
| ENSMUSG00000021408 | Ripk1         | 19766  | turquoise |
| ENSMUSG00000104360 | NA            | NA     | tan       |
| ENSMUSG00000028681 | Ptch2         | 19207  | cyan      |
| ENSMUSG00000056851 | Pcbp2         | 18521  | blue      |
| ENSMUSG00000028683 | Eif2b3        | 108067 | turquoise |
| ENSMUSG00000078249 | Hmga1-rs1     | 111241 | brown     |
| ENSMUSG00000018171 | Vmp1          | 75909  | brown     |
| ENSMUSG00000028684 | Urod          | 22275  | blue      |
| ENSMUSG00000039611 | Tmem246       | 67063  | turquoise |
| ENSMUSG00000046341 | NA            | NA     | red       |
| ENSMUSG00000056854 | NA            | NA     | turquoise |
| ENSMUSG00000053070 | 9230110C19Rik | 234912 | turquoise |
| ENSMUSG00000028687 | Mutyh         | 70603  | turquoise |
| ENSMUSG00000029101 | Rgs12         | 71729  | turquoise |
| ENSMUSG00000039615 | Stub1         | 56424  | blue      |
| ENSMUSG00000028688 | Toe1          | 68276  | blue      |
| ENSMUSG00000028689 | Ccdc163       | 68394  | magenta   |
| ENSMUSG00000029103 | Lrpap1        | 16976  | yellow    |
| ENSMUSG00000063586 | NA            | NA     | lightcyan |
| ENSMUSG00000074513 | Arfp1         | 99889  | turquoise |
| ENSMUSG00000029104 | Htt           | 15194  | turquoise |
| ENSMUSG00000039617 | NA            | NA     | red       |
| ENSMUSG00000029106 | Add1          | 11518  | blue      |
| ENSMUSG00000074516 | NA            | NA     | black     |
| ENSMUSG00000081244 | NA            | NA     | turquoise |
| ENSMUSG00000024952 | Rps6ka4       | 56613  | yellow    |
| ENSMUSG00000029108 | Pcdh7         | 54216  | purple    |
| ENSMUSG00000024953 | NA            | NA     | yellow    |
| ENSMUSG00000031681 | Smad1         | 17125  | grey60    |
| ENSMUSG00000074519 | Etohi1        | 626848 | turquoise |
| ENSMUSG00000024955 | Esrra         | 26379  | turquoise |
| ENSMUSG00000031683 | Lsm6          | 78651  | brown     |
| ENSMUSG00000021171 | Esyt2         | 52635  | brown     |
| ENSMUSG00000081249 | NA            | NA     | pink      |
| ENSMUSG00000024958 | Gpr137        | 107173 | turquoise |
| ENSMUSG00000042613 | Pbxip1        | 229534 | green     |
| ENSMUSG00000024959 | Bad           | 12015  | turquoise |
| ENSMUSG00000032101 | NA            | NA     | turquoise |
| ENSMUSG00000021175 | Cdca7l        | 217946 | red       |
| ENSMUSG00000032103 | Pus3          | 67049  | yellow    |
| ENSMUSG00000042616 | NA            | NA     | yellow    |
| ENSMUSG00000021177 | Tdp1          | 104884 | green     |
| ENSMUSG00000021178 | Psmc1         | 19179  | blue      |
| ENSMUSG00000108331 | NA            | NA     | turquoise |
| ENSMUSG00000000202 | NA            | NA     | red       |
| ENSMUSG00000049891 | NA            | NA     | green     |
| ENSMUSG00000049892 | Rasd1         | 19416  | yellow    |

|                    |               |           |             |
|--------------------|---------------|-----------|-------------|
| ENSMUSG00000039382 | Wdr45         | 54636     | yellow      |
| ENSMUSG00000074280 | NA            | NA        | turquoise   |
| ENSMUSG00000039384 | Dusp10        | 63953     | grey60      |
| ENSMUSG00000084799 | Ino80dos      | 100380944 | turquoise   |
| ENSMUSG00000028920 | Fbxo42        | 213499    | cyan        |
| ENSMUSG00000028923 | Necap2        | 66147     | turquoise   |
| ENSMUSG00000018411 | Mapt          | 17762     | blue        |
| ENSMUSG00000042380 | Smim12        | 80284     | blue        |
| ENSMUSG00000025140 | Pycr1         | 209027    | magenta     |
| ENSMUSG00000018412 | Kansl1        | 76719     | blue        |
| ENSMUSG00000028926 | Cdk14         | 18647     | turquoise   |
| ENSMUSG00000017999 | Ddx27         | 228889    | red         |
| ENSMUSG00000025142 | Aspscr1       | 68938     | turquoise   |
| ENSMUSG00000028927 | Padi2         | 18600     | turquoise   |
| ENSMUSG00000018415 | Gid4          | 66771     | black       |
| ENSMUSG00000025144 | Stra13        | 20892     | black       |
| ENSMUSG00000025145 | Lrrc45        | 217366    | blue        |
| ENSMUSG00000018417 | Myo1b         | 17912     | blue        |
| ENSMUSG00000025147 | Mob2          | 101513    | green       |
| ENSMUSG00000042388 | Dlgap3        | 242667    | salmon      |
| ENSMUSG00000020992 | NA            | NA        | turquoise   |
| ENSMUSG00000042389 | Tsen2         | 381802    | red         |
| ENSMUSG00000020993 | Trappc6b      | 78232     | blue        |
| ENSMUSG00000003752 | Itpkc         | 233011    | turquoise   |
| ENSMUSG00000053317 | Sec61b        | 66212     | blue        |
| ENSMUSG00000020994 | Pnn           | 18949     | turquoise   |
| ENSMUSG00000031921 | Terf2         | 21750     | blue        |
| ENSMUSG00000031922 | Cep57         | 74360     | green       |
| ENSMUSG00000031924 | Cyb5b         | 66427     | brown       |
| ENSMUSG00000031925 | Maml2         | 270118    | turquoise   |
| ENSMUSG00000021413 | Prpf4b        | 19134     | blue        |
| ENSMUSG00000031928 | Mre11a        | 17535     | salmon      |
| ENSMUSG00000021417 | Eci2          | 23986     | brown       |
| ENSMUSG00000028690 | Mmachc        | 67096     | red         |
| ENSMUSG00000028691 | NA            | NA        | greenyellow |
| ENSMUSG00000028692 | Akr1a1        | 58810     | black       |
| ENSMUSG00000039620 | 6430573F11Rik | 319582    | blue        |
| ENSMUSG00000028693 | Nasp          | 50927     | black       |
| ENSMUSG00000039621 | Prex1         | 277360    | purple      |
| ENSMUSG00000046351 | Zfp322a       | 218100    | blue        |
| ENSMUSG00000029110 | Rnf4          | 19822     | green       |
| ENSMUSG00000039623 | Ap5z1         | 231855    | yellow      |
| ENSMUSG00000053080 | 2700081O15Rik | 108899    | turquoise   |
| ENSMUSG00000029111 | Nelfa         | 24116     | green       |
| ENSMUSG00000028698 | Pik3r3        | 18710     | cyan        |
| ENSMUSG00000074521 | NA            | NA        | turquoise   |
| ENSMUSG00000081251 | NA            | NA        | tan         |
| ENSMUSG00000024960 | Plcb3         | 18797     | yellow      |
| ENSMUSG00000018189 | Uchl5         | 56207     | red         |
| ENSMUSG00000081254 | NA            | NA        | turquoise   |
| ENSMUSG00000024962 | Vegfb         | 22340     | turquoise   |
| ENSMUSG00000007721 | Ccdc124       | 234388    | black       |
| ENSMUSG00000074527 | NA            | NA        | turquoise   |
| ENSMUSG00000081255 | NA            | NA        | lightcyan   |

|                    |               |        |           |
|--------------------|---------------|--------|-----------|
| ENSMUSG00000031691 | Tnpo2         | 212999 | green     |
| ENSMUSG00000029119 | Man2b2        | 17160  | blue      |
| ENSMUSG00000021180 | Rps6ka5       | 73086  | pink      |
| ENSMUSG00000024966 | Stip1         | 20867  | red       |
| ENSMUSG00000021182 | Ccdc88c       | 68339  | turquoise |
| ENSMUSG00000031696 | Vps35         | 65114  | green     |
| ENSMUSG00000024969 | Mark2         | 13728  | turquoise |
| ENSMUSG00000031697 | Orc6          | 56452  | green     |
| ENSMUSG00000042625 | Safb2         | 224902 | turquoise |
| ENSMUSG00000032112 | Trappc4       | 60409  | brown     |
| ENSMUSG00000032113 | Chek1         | 12649  | salmon    |
| ENSMUSG00000042626 | Shc1          | 20416  | turquoise |
| ENSMUSG00000032114 | Slc37a4       | 14385  | yellow    |
| ENSMUSG00000021188 | Trip11        | 109181 | blue      |
| ENSMUSG00000042628 | Zfyve1        | 217695 | turquoise |
| ENSMUSG00000032115 | Hyou1         | 12282  | turquoise |
| ENSMUSG00000021189 | Atxn3         | 110616 | green     |
| ENSMUSG00000032116 | Stt3a         | 16430  | brown     |
| ENSMUSG00000032118 | Fez1          | 235180 | turquoise |
| ENSMUSG00000010721 | Lmbr1         | 56873  | turquoise |
| ENSMUSG00000032119 | Hinfp         | 102423 | turquoise |
| ENSMUSG00000095730 | Vmn2r29       | 76229  | turquoise |
| ENSMUSG00000039396 | Neil3         | 234258 | magenta   |
| ENSMUSG00000067567 | Hdac8         | 70315  | turquoise |
| ENSMUSG00000028932 | Psmc2         | 19181  | blue      |
| ENSMUSG00000042390 | Gatad2b       | 229542 | blue      |
| ENSMUSG00000085227 | 6330418K02Rik | 69004  | turquoise |
| ENSMUSG00000063830 | NA            | NA     | tan       |
| ENSMUSG00000025151 | Maged1        | 94275  | blue      |
| ENSMUSG00000028936 | Rpl22         | 19934  | green     |
| ENSMUSG00000028937 | Acot7         | 70025  | blue      |
| ENSMUSG00000025153 | Fasn          | 14104  | yellow    |
| ENSMUSG00000018425 | Dhx40         | 67487  | turquoise |
| ENSMUSG00000035666 | Gtf3c4        | 269252 | turquoise |
| ENSMUSG00000025155 | Dus1l         | 68730  | red       |
| ENSMUSG00000042396 | Rbm7          | 67010  | green     |
| ENSMUSG00000025156 | Gps1          | 209318 | blue      |
| ENSMUSG00000018428 | Akap1         | 11640  | turquoise |
| ENSMUSG00000070565 | Rasal2        | 226525 | turquoise |
| ENSMUSG00000025157 | Zdhhc16       | 74168  | turquoise |
| ENSMUSG00000025158 | Rfng          | 19719  | blue      |
| ENSMUSG00000025159 | Mms19         | 72199  | blue      |
| ENSMUSG00000031930 | Wwp2          | 66894  | blue      |
| ENSMUSG00000003762 | Adck4         | 76889  | turquoise |
| ENSMUSG00000031931 | Ankrd49       | 56503  | blue      |
| ENSMUSG00000053329 | D10Jhu81e     | 28295  | brown     |
| ENSMUSG00000021420 | Fars2         | 69955  | yellow    |
| ENSMUSG00000031934 | NA            | NA     | blue      |
| ENSMUSG00000031935 | Med17         | 234959 | turquoise |
| ENSMUSG00000031938 | 4931406C07Rik | 70984  | turquoise |
| ENSMUSG00000031939 | Taf1d         | 75316  | cyan      |
| ENSMUSG00000021427 | Ssr1          | 107513 | turquoise |
| ENSMUSG00000021428 | Riok1         | 71340  | blue      |
| ENSMUSG00000056870 | Gulp1         | 70676  | turquoise |

|                    |          |        |           |
|--------------------|----------|--------|-----------|
| ENSMUSG00000039630 | NA       | NA     | red       |
| ENSMUSG00000104389 | NA       | NA     | turquoise |
| ENSMUSG00000029121 | Crmp1    | 12933  | red       |
| ENSMUSG00000039634 | Zfp189   | 230162 | yellow    |
| ENSMUSG00000029122 | Evc      | 59056  | turquoise |
| ENSMUSG00000046364 | Rpl27a   | 26451  | black     |
| ENSMUSG00000018196 | Glrx2    | 69367  | green     |
| ENSMUSG00000039637 | Coro7    | 78885  | turquoise |
| ENSMUSG00000029125 | Stx18    | 71116  | turquoise |
| ENSMUSG00000053094 | Tmem248  | 71667  | turquoise |
| ENSMUSG00000024970 | AI846148 | 68229  | turquoise |
| ENSMUSG00000018199 | Trove2   | 20822  | turquoise |
| ENSMUSG00000081263 | NA       | NA     | tan       |
| ENSMUSG00000029126 | Nsg1     | 18196  | black     |
| ENSMUSG00000029127 | Zbtb49   | 75079  | turquoise |
| ENSMUSG00000029128 | Rab28    | 100972 | turquoise |
| ENSMUSG00000035900 | Gramd4   | 223752 | yellow    |
| ENSMUSG00000024974 | Smc3     | 13006  | black     |
| ENSMUSG00000035901 | Dennd5a  | 19347  | turquoise |
| ENSMUSG00000024975 | Pdcd4    | 18569  | turquoise |
| ENSMUSG00000021190 | Lgmn     | 19141  | blue      |
| ENSMUSG00000024976 | Shoc2    | 56392  | blue      |
| ENSMUSG00000042632 | Pla2g6   | 53357  | green     |
| ENSMUSG00000021192 | Golga5   | 27277  | turquoise |
| ENSMUSG00000024978 | Gpam     | 14732  | yellow    |
| ENSMUSG00000021193 | Pitrm1   | 69617  | black     |
| ENSMUSG00000032120 | C2cd2l   | 71764  | turquoise |
| ENSMUSG00000032121 | Tmem218  | 66279  | turquoise |
| ENSMUSG00000007739 | Cct4     | 12464  | black     |
| ENSMUSG00000021196 | Pfkp     | 56421  | purple    |
| ENSMUSG00000032123 | Dpagt1   | 13478  | turquoise |
| ENSMUSG00000021198 | Unc79    | 217843 | turquoise |
| ENSMUSG00000032126 | Hmbs     | 15288  | brown     |
| ENSMUSG00000032127 | Vps11    | 71732  | blue      |
| ENSMUSG00000070808 | Gltscr1  | 243842 | turquoise |
| ENSMUSG00000099471 | Gm8451   | 667090 | tan       |
| ENSMUSG00000108350 | NA       | NA     | blue      |
| ENSMUSG00000000223 | Drp2     | 13497  | turquoise |
| ENSMUSG00000099478 | NA       | NA     | turquoise |
| ENSMUSG00000108357 | NA       | NA     | tan       |
| ENSMUSG00000104623 | NA       | NA     | black     |
| ENSMUSG00000035671 | Zswim4   | 212168 | pink      |
| ENSMUSG00000085236 | NA       | NA     | green     |
| ENSMUSG00000057069 | Ero1lb   | 67475  | turquoise |
| ENSMUSG00000028944 | Prkag2   | 108099 | turquoise |
| ENSMUSG00000035673 | Sbno2    | 216161 | pink      |
| ENSMUSG00000028945 | Rheb     | 19744  | brown     |
| ENSMUSG00000018433 | Nol11    | 68979  | red       |
| ENSMUSG00000035674 | Ndufa3   | 66091  | turquoise |
| ENSMUSG00000025162 | Csnk1d   | 104318 | blue      |
| ENSMUSG00000028948 | Nol9     | 74035  | blue      |
| ENSMUSG00000070572 | NA       | NA     | blue      |
| ENSMUSG00000028949 | Smarcd3  | 66993  | turquoise |
| ENSMUSG00000053332 | Gas5     | 14455  | blue      |

|                    |               |           |              |
|--------------------|---------------|-----------|--------------|
| ENSMUSG00000046605 | B3gnt11       | 210004    | turquoise    |
| ENSMUSG00000053333 | Dis3l2        | 208718    | blue         |
| ENSMUSG00000053334 | Ficd          | 231630    | turquoise    |
| ENSMUSG00000070576 | Mn1           | 433938    | purple       |
| ENSMUSG00000063849 | Ppcdc         | 66812     | turquoise    |
| ENSMUSG00000025169 | Ogfod3        | 66179     | turquoise    |
| ENSMUSG00000060068 | NA            | NA        | yellow       |
| ENSMUSG00000021431 | Snrnp48       | 67797     | turquoise    |
| ENSMUSG00000021432 | Slc35b3       | 108652    | pink         |
| ENSMUSG00000003778 | Brd8          | 78656     | green        |
| ENSMUSG00000003779 | Kif20a        | 19348     | magenta      |
| ENSMUSG00000031948 | Kars          | 85305     | black        |
| ENSMUSG00000031949 | Adat1         | 30947     | pink         |
| ENSMUSG00000039640 | NA            | NA        | blue         |
| ENSMUSG00000029131 | Dnajb6        | 23950     | green        |
| ENSMUSG00000039646 | Vasn          | 246154    | turquoise    |
| ENSMUSG00000091784 | NA            | NA        | turquoise    |
| ENSMUSG00000064030 | Pym1          | 78428     | cyan         |
| ENSMUSG00000081272 | NA            | NA        | midnightblue |
| ENSMUSG00000039648 | Ccbl1         | 70266     | turquoise    |
| ENSMUSG00000029136 | Rbks          | 71336     | greenyellow  |
| ENSMUSG00000024982 | Zdhhc6        | 66980     | brown        |
| ENSMUSG00000024983 | NA            | NA        | green        |
| ENSMUSG00000092203 | 1110038B12Rik | 68763     | red          |
| ENSMUSG00000014470 | Rnf166        | 68718     | turquoise    |
| ENSMUSG00000081277 | NA            | NA        | lightcyan    |
| ENSMUSG00000024985 | Tcf7l2        | 21416     | yellow       |
| ENSMUSG00000064037 | NA            | NA        | black        |
| ENSMUSG00000081278 | NA            | NA        | brown        |
| ENSMUSG00000035914 | Cd276         | 102657    | cyan         |
| ENSMUSG00000042642 | Flad1         | 319945    | turquoise    |
| ENSMUSG00000024989 | Cep55         | 74107     | magenta      |
| ENSMUSG00000032131 | Abcg4         | 192663    | yellow       |
| ENSMUSG00000025403 | Shmt2         | 108037    | black        |
| ENSMUSG00000025404 | R3hdm2        | 71750     | turquoise    |
| ENSMUSG00000060301 | 2610008E11Rik | 72128     | turquoise    |
| ENSMUSG00000035919 | Bbs9          | 319845    | brown        |
| ENSMUSG00000025407 | Gli1          | 14632     | green        |
| ENSMUSG00000025408 | Ddit3         | 13198     | brown        |
| ENSMUSG00000025409 | Mbd6          | 110962    | turquoise    |
| ENSMUSG00000099481 | Xndc1         | 102443350 | green        |
| ENSMUSG00000099488 | NA            | NA        | pink         |
| ENSMUSG00000108366 | NA            | NA        | green        |
| ENSMUSG00000067586 | S1pr3         | 13610     | turquoise    |
| ENSMUSG00000085241 | Snhg3         | 399101    | turquoise    |
| ENSMUSG00000078515 | NA            | NA        | turquoise    |
| ENSMUSG00000085245 | NA            | NA        | blue         |
| ENSMUSG00000028952 | Zbtb48        | 100090    | brown        |
| ENSMUSG00000078517 | Emc1          | 230866    | turquoise    |
| ENSMUSG00000085246 | NA            | NA        | pink         |
| ENSMUSG00000028953 | Abcf2         | 27407     | green        |
| ENSMUSG00000028954 | Nub1          | 53312     | turquoise    |
| ENSMUSG00000018442 | Derl2         | 116891    | turquoise    |
| ENSMUSG00000028955 | Vamp3         | 22319     | black        |

|                    |          |        |           |
|--------------------|----------|--------|-----------|
| ENSMUSG00000035683 | Melk     | 17279  | magenta   |
| ENSMUSG00000028957 | Per3     | 18628  | red       |
| ENSMUSG00000025173 | Wdr45b   | 66840  | green     |
| ENSMUSG00000035686 | Thrsp    | 21835  | blue      |
| ENSMUSG00000028958 | Tmub1    | 64295  | turquoise |
| ENSMUSG00000018446 | C1qbp    | 12261  | blue      |
| ENSMUSG00000028959 | Fastk    | 66587  | turquoise |
| ENSMUSG00000063856 | Gpx1     | 14775  | green     |
| ENSMUSG00000060073 | Psm3     | 19167  | turquoise |
| ENSMUSG00000018449 | Rpain    | 69723  | blue      |
| ENSMUSG00000036104 | Rab3gap1 | 226407 | turquoise |
| ENSMUSG00000025178 | Pi4k2a   | 84095  | turquoise |
| ENSMUSG00000053347 | Zfp943   | 74670  | turquoise |
| ENSMUSG00000031950 | NA       | NA     | turquoise |
| ENSMUSG00000031951 | Tmem231  | 234740 | green     |
| ENSMUSG00000081516 | NA       | NA     | turquoise |
| ENSMUSG00000031954 | Cfdp1    | 23837  | green     |
| ENSMUSG00000031955 | Bcar1    | 12927  | blue      |
| ENSMUSG00000031959 | Wdr59    | 319481 | brown     |
| ENSMUSG00000021448 | Shc3     | 20418  | turquoise |
| ENSMUSG00000004207 | Psap     | 19156  | purple    |
| ENSMUSG00000039652 | Cpeb3    | 208922 | blue      |
| ENSMUSG00000108608 | NA       | NA     | turquoise |
| ENSMUSG00000029141 | Slc4a1ap | 20534  | turquoise |
| ENSMUSG00000108609 | NA       | NA     | blue      |
| ENSMUSG00000039656 | Rxrb     | 20182  | turquoise |
| ENSMUSG00000074553 | NA       | NA     | turquoise |
| ENSMUSG00000067825 | Pex26    | 74043  | cyan      |
| ENSMUSG00000081281 | NA       | NA     | tan       |
| ENSMUSG00000029145 | Eif2b4   | 13667  | brown     |
| ENSMUSG00000029146 | Snx17    | 266781 | turquoise |
| ENSMUSG00000024991 | Eif3a    | 13669  | blue      |
| ENSMUSG00000064043 | NA       | NA     | turquoise |
| ENSMUSG00000029147 | Ppm1g    | 14208  | green     |
| ENSMUSG00000081285 | NA       | NA     | brown     |
| ENSMUSG00000029148 | Nrbp1    | 192292 | turquoise |
| ENSMUSG00000024993 | Fam45a   | 67894  | turquoise |
| ENSMUSG00000042650 | Alkbh5   | 268420 | green     |
| ENSMUSG00000025410 | Dctn2    | 69654  | turquoise |
| ENSMUSG00000081289 | NA       | NA     | lightcyan |
| ENSMUSG00000024997 | Prdx3    | 11757  | turquoise |
| ENSMUSG00000024999 | Noc3l    | 57753  | turquoise |
| ENSMUSG00000025413 | Ttc4     | 72354  | blue      |
| ENSMUSG00000025417 | Pip4k2c  | 117150 | green     |
| ENSMUSG00000042659 | Arrdc4   | 66412  | grey60    |
| ENSMUSG00000099492 | NA       | NA     | black     |
| ENSMUSG00000010755 | Cars     | 27267  | blue      |
| ENSMUSG00000000247 | Lhx2     | 16870  | turquoise |
| ENSMUSG00000095762 | NA       | NA     | turquoise |
| ENSMUSG00000095766 | NA       | NA     | yellow    |
| ENSMUSG00000104642 | NA       | NA     | pink      |
| ENSMUSG00000028960 | Ube4b    | 63958  | turquoise |
| ENSMUSG00000028961 | Pgd      | 110208 | green     |
| ENSMUSG00000028962 | Slc4a2   | 20535  | brown     |



|                     |               |        |           |
|---------------------|---------------|--------|-----------|
| ENSMUSG00000068014  | NA            | NA     | brown     |
| ENSMUSG00000078528  | NA            | NA     | turquoise |
| ENSMUSG00000068015  | Lrch1         | 380916 | yellow    |
| ENSMUSG00000018451  | NA            | NA     | blue      |
| ENSMUSG000000104646 | NA            | NA     | turquoise |
| ENSMUSG00000028964  | Park7         | 57320  | yellow    |
| ENSMUSG00000046620  | NA            | NA     | pink      |
| ENSMUSG000000104649 | NA            | NA     | pink      |
| ENSMUSG00000028967  | Errfi1        | 74155  | turquoise |
| ENSMUSG00000035696  | Rnf38         | 73469  | blue      |
| ENSMUSG00000025184  | R3hcc1l       | 52013  | turquoise |
| ENSMUSG00000036111  | Lmo1          | 109594 | turquoise |
| ENSMUSG00000028969  | Cdk5          | 12568  | turquoise |
| ENSMUSG00000036112  | Metap2        | 56307  | blue      |
| ENSMUSG00000018459  | Slc13a3       | 114644 | purple    |
| ENSMUSG00000036114  | Rpp25l        | 69961  | turquoise |
| ENSMUSG00000025188  | Hps1          | 192236 | turquoise |
| ENSMUSG00000031960  | NA            | NA     | red       |
| ENSMUSG00000071014  | Ndufb6        | 230075 | brown     |
| ENSMUSG00000031963  | Bmper         | 73230  | turquoise |
| ENSMUSG00000021451  | Sema4d        | 20354  | turquoise |
| ENSMUSG00000021453  | Gadd45g       | 23882  | blue      |
| ENSMUSG00000031967  | Afg3l1        | 114896 | green     |
| ENSMUSG00000031969  | Acad8         | 66948  | turquoise |
| ENSMUSG00000021458  | 2010111I01Rik | 72061  | brown     |
| ENSMUSG00000078291  | NA            | NA     | pink      |
| ENSMUSG000000108610 | NA            | NA     | turquoise |
| ENSMUSG00000039660  | D2Wsu81e      | 227695 | blue      |
| ENSMUSG000000108615 | NA            | NA     | yellow    |
| ENSMUSG000000108616 | NA            | NA     | blue      |
| ENSMUSG00000039662  | Icmt          | 57295  | grey60    |
| ENSMUSG00000029152  | Ociad1        | 68095  | turquoise |
| ENSMUSG00000057322  | Rpl38         | 67671  | black     |
| ENSMUSG000000100680 | 1810044D09Rik | 69798  | pink      |
| ENSMUSG00000029156  | Sgcb          | 24051  | turquoise |
| ENSMUSG00000074569  | Gcnt7         | 654821 | turquoise |
| ENSMUSG00000042660  | Wdr55         | 67936  | pink      |
| ENSMUSG00000057329  | Bcl2          | 12043  | yellow    |
| ENSMUSG00000025420  | Katnal2       | 71206  | purple    |
| ENSMUSG00000035933  | Cog5          | 238123 | turquoise |
| ENSMUSG00000025421  | Hdhd2         | 76987  | blue      |
| ENSMUSG00000035934  | Pknox2        | 208076 | turquoise |
| ENSMUSG00000025422  | Agap2         | 216439 | blue      |
| ENSMUSG00000025423  | Pias2         | 17344  | blue      |
| ENSMUSG00000035936  | Aldh5a1       | 214579 | turquoise |
| ENSMUSG00000014496  | Ankrd28       | 105522 | blue      |
| ENSMUSG00000025425  | St8sia5       | 225742 | turquoise |
| ENSMUSG00000070834  | NA            | NA     | brown     |
| ENSMUSG00000025428  | Atp5a1        | 11946  | turquoise |
| ENSMUSG000000108381 | NA            | NA     | turquoise |
| ENSMUSG00000057093  | C030039L03Rik | 112415 | turquoise |
| ENSMUSG00000028970  | Abcb1b        | 18669  | turquoise |
| ENSMUSG00000028973  | Abcb8         | 74610  | yellow    |
| ENSMUSG00000039901  | 9130011E15Rik | 71617  | brown     |

|                    |               |        |           |
|--------------------|---------------|--------|-----------|
| ENSMUSG00000028974 | Dffa          | 13347  | turquoise |
| ENSMUSG00000063870 | Chd4          | 107932 | cyan      |
| ENSMUSG00000025190 | Got1          | 14718  | turquoise |
| ENSMUSG00000028975 | Pex14         | 56273  | blue      |
| ENSMUSG00000025192 | Entpd7        | 93685  | turquoise |
| ENSMUSG00000074800 | NA            | NA     | black     |
| ENSMUSG00000025193 | Cutc          | 66388  | turquoise |
| ENSMUSG00000036120 | Rfxank        | 19727  | turquoise |
| ENSMUSG00000063875 | NA            | NA     | tan       |
| ENSMUSG00000074802 | Gas2l3        | 237436 | magenta   |
| ENSMUSG00000060090 | Rp2           | 19889  | green     |
| ENSMUSG00000025195 | NA            | NA     | brown     |
| ENSMUSG00000046636 | NA            | NA     | red       |
| ENSMUSG00000025198 | Erlin1        | 226144 | brown     |
| ENSMUSG00000081534 | Slc48a1       | 67739  | blue      |
| ENSMUSG00000025199 | Chuk          | 12675  | blue      |
| ENSMUSG00000060096 | NA            | NA     | turquoise |
| ENSMUSG00000031972 | Acta1         | 11459  | turquoise |
| ENSMUSG00000021460 | Auh           | 11992  | turquoise |
| ENSMUSG00000060098 | NA            | NA     | red       |
| ENSMUSG00000031974 | Abcb10        | 56199  | turquoise |
| ENSMUSG00000042901 | NA            | NA     | green     |
| ENSMUSG00000004221 | Ikbkg         | 16151  | green     |
| ENSMUSG00000042903 | Foxo4         | 54601  | turquoise |
| ENSMUSG00000021466 | Ptch1         | 19206  | blue      |
| ENSMUSG00000031979 | Cog2          | 76332  | turquoise |
| ENSMUSG00000021468 | Sptlc1        | 268656 | yellow    |
| ENSMUSG00000108621 | NA            | NA     | turquoise |
| ENSMUSG00000039670 | Oxld1         | 66431  | turquoise |
| ENSMUSG00000039671 | Zmynd8        | 228880 | yellow    |
| ENSMUSG00000108628 | NA            | NA     | brown     |
| ENSMUSG00000029162 | Khk           | 16548  | turquoise |
| ENSMUSG00000064061 | Dzip3         | 224170 | red       |
| ENSMUSG00000039678 | Tbc1d13       | 70296  | pink      |
| ENSMUSG00000092230 | NA            | NA     | brown     |
| ENSMUSG00000067847 | Romo1         | 67067  | blue      |
| ENSMUSG00000029166 | Mapre3        | 100732 | yellow    |
| ENSMUSG00000064063 | BC048507      | 408058 | blue      |
| ENSMUSG00000057335 | Cep170        | 545389 | blue      |
| ENSMUSG00000074576 | Mocs3         | 69372  | brown     |
| ENSMUSG00000029168 | Dpysl5        | 65254  | green     |
| ENSMUSG00000074578 | Zfos1         | 68949  | black     |
| ENSMUSG00000029169 | Dhx15         | 13204  | red       |
| ENSMUSG00000035941 | Ibtk          | 108837 | turquoise |
| ENSMUSG00000101111 | NA            | NA     | yellow    |
| ENSMUSG00000042670 | Immp1l        | 66541  | turquoise |
| ENSMUSG00000064068 | Mtx1          | 17827  | blue      |
| ENSMUSG00000035944 | Ttc38         | 239570 | turquoise |
| ENSMUSG00000007777 | 0610009B22Rik | 66050  | blue      |
| ENSMUSG00000035946 | Gsx2          | 14843  | blue      |
| ENSMUSG00000042675 | Ypel3         | 66090  | yellow    |
| ENSMUSG00000018707 | Dync1h1       | 13424  | turquoise |
| ENSMUSG00000025436 | Xrcc6bp1      | 68876  | turquoise |
| ENSMUSG00000053604 | Rpia          | 19895  | lightcyan |

|                    |               |        |              |
|--------------------|---------------|--------|--------------|
| ENSMUSG00000035949 | Fbxw2         | 30050  | pink         |
| ENSMUSG00000025437 | Usp33         | 170822 | brown        |
| ENSMUSG00000025439 | NA            | NA     | red          |
| ENSMUSG00000060336 | Zfp937        | 245174 | turquoise    |
| ENSMUSG00000021700 | Rab3c         | 67295  | cyan         |
| ENSMUSG00000021701 | Plk2          | 20620  | turquoise    |
| ENSMUSG00000021703 | Serinc5       | 218442 | turquoise    |
| ENSMUSG00000021704 | Mtx3          | 382793 | turquoise    |
| ENSMUSG00000108394 | NA            | NA     | turquoise    |
| ENSMUSG00000021706 | Zfyve16       | 218441 | turquoise    |
| ENSMUSG00000108396 | NA            | NA     | pink         |
| ENSMUSG00000000266 | Mid2          | 23947  | yellow       |
| ENSMUSG00000021709 | Erbp2ip       | 59079  | brown        |
| ENSMUSG00000078546 | 2210404O09Rik | 70081  | brown        |
| ENSMUSG00000104663 | NA            | NA     | turquoise    |
| ENSMUSG00000104664 | NA            | NA     | turquoise    |
| ENSMUSG00000028982 | Slc25a33      | 70556  | yellow       |
| ENSMUSG00000018470 | Kcnab3        | 16499  | turquoise    |
| ENSMUSG00000068036 | Mlt4          | 17356  | turquoise    |
| ENSMUSG00000039911 | Spsb1         | 74646  | turquoise    |
| ENSMUSG00000028986 | Klhl7         | 52323  | black        |
| ENSMUSG00000063882 | Uqcrh         | 66576  | midnightblue |
| ENSMUSG00000068039 | Tcp1          | 21454  | green        |
| ENSMUSG00000018474 | Chd3          | 216848 | red          |
| ENSMUSG00000039914 | Coq10a        | 210582 | turquoise    |
| ENSMUSG00000029401 | Rilp2         | 80291  | turquoise    |
| ENSMUSG00000028988 | Ctnnbip1      | 67087  | turquoise    |
| ENSMUSG00000029402 | Snrnp35       | 76167  | pink         |
| ENSMUSG00000063884 | Ptcd3         | 69956  | blue         |
| ENSMUSG00000018476 | Kdm6b         | 216850 | turquoise    |
| ENSMUSG00000063885 | Gm6498        | 624367 | pink         |
| ENSMUSG00000029404 | Arl6ip4       | 65105  | green        |
| ENSMUSG00000039917 | Rhbdd2        | 215160 | turquoise    |
| ENSMUSG00000029405 | G3bp2         | 23881  | midnightblue |
| ENSMUSG00000063887 | Nlgn1         | 192167 | turquoise    |
| ENSMUSG00000063888 | Rpl7l1        | 66229  | blue         |
| ENSMUSG00000064302 | Clasp1        | 76707  | green        |
| ENSMUSG00000029406 | Pitpnm2       | 19679  | turquoise    |
| ENSMUSG00000081544 | NA            | NA     | turquoise    |
| ENSMUSG00000029407 | Uso1          | 56041  | pink         |
| ENSMUSG00000029408 | Abcb9         | 56325  | yellow       |
| ENSMUSG00000036138 | Acaa1a        | 113868 | turquoise    |
| ENSMUSG00000031982 | Arv1          | 68865  | pink         |
| ENSMUSG00000071035 | NA            | NA     | yellow       |
| ENSMUSG00000021470 | Ercc6l2       | 76251  | turquoise    |
| ENSMUSG00000031983 | 2310022B05Rik | 69551  | turquoise    |
| ENSMUSG00000064307 | Lrrc51        | 69358  | turquoise    |
| ENSMUSG00000031984 | 2810004N23Rik | 66523  | blue         |
| ENSMUSG00000071037 | NA            | NA     | turquoise    |
| ENSMUSG00000031985 | Gnpat         | 14712  | turquoise    |
| ENSMUSG00000032400 | Zwilch        | 68014  | magenta      |
| ENSMUSG00000021474 | Sfxn1         | 14057  | blue         |
| ENSMUSG00000031987 | Egn1          | 112405 | turquoise    |
| ENSMUSG00000004233 | Wars2         | 70560  | blue         |

|                    |               |        |             |
|--------------------|---------------|--------|-------------|
| ENSMUSG00000031988 | Vps26b        | 69091  | turquoise   |
| ENSMUSG00000021476 | Habp4         | 56541  | yellow      |
| ENSMUSG00000032403 | 2300009A05Rik | 69478  | green       |
| ENSMUSG00000014748 | NA            | NA     | turquoise   |
| ENSMUSG00000021477 | Ctsl          | 13039  | greenyellow |
| ENSMUSG00000032405 | Pias1         | 56469  | turquoise   |
| ENSMUSG00000032407 | U2surp        | 67958  | turquoise   |
| ENSMUSG00000032409 | Atr           | 245000 | turquoise   |
| ENSMUSG00000039680 | Mrps6         | 121022 | brown       |
| ENSMUSG00000039682 | Lap3          | 66988  | turquoise   |
| ENSMUSG00000067851 | Arfgef1       | 211673 | blue        |
| ENSMUSG00000039684 | NA            | NA     | blue        |
| ENSMUSG00000029171 | Pgm1          | 66681  | brown       |
| ENSMUSG00000074582 | Arfgef2       | 99371  | turquoise   |
| ENSMUSG00000029173 | NA            | NA     | turquoise   |
| ENSMUSG00000039686 | Zer1          | 227693 | turquoise   |
| ENSMUSG00000057342 | Sphk2         | 56632  | blue        |
| ENSMUSG00000029174 | Tbc1d1        | 57915  | red         |
| ENSMUSG00000029175 | Slc35f6       | 74919  | purple      |
| ENSMUSG00000029176 | NA            | NA     | blue        |
| ENSMUSG00000075000 | Nrbf2         | 641340 | blue        |
| ENSMUSG00000029177 | Cenpa         | 12615  | magenta     |
| ENSMUSG00000029178 | Klf3          | 16599  | turquoise   |
| ENSMUSG00000092242 | NA            | NA     | turquoise   |
| ENSMUSG00000029179 | Zcchc4        | 78796  | turquoise   |
| ENSMUSG00000007783 | Cpt1c         | 78070  | turquoise   |
| ENSMUSG00000042680 | Garem         | 381126 | yellow      |
| ENSMUSG00000035953 | Tmem55b       | 219024 | turquoise   |
| ENSMUSG00000035954 | Dock4         | 238130 | turquoise   |
| ENSMUSG00000042682 | Selk          | 80795  | yellow      |
| ENSMUSG00000008200 | Fnbp4         | 55935  | blue        |
| ENSMUSG00000092247 | NA            | NA     | turquoise   |
| ENSMUSG00000032171 | Pin1          | 23988  | green       |
| ENSMUSG00000032172 | Olfm2         | 244723 | blue        |
| ENSMUSG00000035958 | Tdp2          | 56196  | blue        |
| ENSMUSG00000042688 | Mapk6         | 50772  | blue        |
| ENSMUSG00000032175 | Tyk2          | 54721  | turquoise   |
| ENSMUSG00000008206 | NA            | NA     | yellow      |
| ENSMUSG00000070858 | Gm1673        | 381633 | brown       |
| ENSMUSG00000032178 | Ilf3          | 16201  | green       |
| ENSMUSG00000021710 | Nln           | 75805  | turquoise   |
| ENSMUSG00000021711 | Trappc13      | 66975  | brown       |
| ENSMUSG00000021712 | Trim23        | 81003  | turquoise   |
| ENSMUSG00000021713 | Ppwd1         | 238831 | blue        |
| ENSMUSG00000021714 | Cenpk         | 60411  | magenta     |
| ENSMUSG00000021715 | Cwc27         | 67285  | blue        |
| ENSMUSG00000000275 | Trim25        | 217069 | turquoise   |
| ENSMUSG00000021716 | NA            | NA     | turquoise   |
| ENSMUSG00000000276 | Dgke          | 56077  | yellow      |
| ENSMUSG00000000278 | Scpep1        | 74617  | green       |
| ENSMUSG00000021719 | Rgs7bp        | 52882  | turquoise   |
| ENSMUSG00000068040 | Tm9sf4        | 99237  | yellow      |
| ENSMUSG00000104671 | NA            | NA     | turquoise   |
| ENSMUSG00000096210 | H1f0          | 14958  | purple      |

|                    |               |           |              |
|--------------------|---------------|-----------|--------------|
| ENSMUSG00000028990 | Lzic          | 69151     | green        |
| ENSMUSG00000028991 | Mtor          | 56717     | turquoise    |
| ENSMUSG00000028992 | Nmnat1        | 66454     | turquoise    |
| ENSMUSG00000018481 | NA            | NA        | brown        |
| ENSMUSG00000028995 | Fam126a       | 84652     | yellow       |
| ENSMUSG00000063894 | Zkscan8       | 93681     | brown        |
| ENSMUSG00000028998 | Tomm7         | 66169     | blue         |
| ENSMUSG00000063895 | Nupl1         | 71844     | red          |
| ENSMUSG00000028999 | Rint1         | 72772     | turquoise    |
| ENSMUSG00000029413 | Naaa          | 67111     | purple       |
| ENSMUSG00000081552 | NA            | NA        | tan          |
| ENSMUSG00000029415 | Sdad1         | 231452    | lightcyan    |
| ENSMUSG00000071040 | NA            | NA        | lightcyan    |
| ENSMUSG00000039929 | Urb1          | 207932    | turquoise    |
| ENSMUSG00000074825 | NA            | NA        | black        |
| ENSMUSG00000081553 | NA            | NA        | blue         |
| ENSMUSG00000029416 | Slc15a4       | 100561    | pink         |
| ENSMUSG00000074826 | Gm10767       | 100038538 | yellow       |
| ENSMUSG00000071041 | Gm15210       | 100042069 | black        |
| ENSMUSG00000046658 | Zfp316        | 54201     | grey60       |
| ENSMUSG00000031990 | Jam3          | 83964     | blue         |
| ENSMUSG00000074829 | 2010315B03Rik | 630836    | yellow       |
| ENSMUSG00000031993 | Snx19         | 102607    | blue         |
| ENSMUSG00000064317 | NA            | NA        | red          |
| ENSMUSG00000021481 | Zfp346        | 26919     | brown        |
| ENSMUSG00000081559 | NA            | NA        | blue         |
| ENSMUSG00000021482 | Aaed1         | 66129     | turquoise    |
| ENSMUSG00000021483 | Cdk20         | 105278    | turquoise    |
| ENSMUSG00000032410 | Xrn1          | 24127     | blue         |
| ENSMUSG00000031996 | Aplp2         | 11804     | cyan         |
| ENSMUSG00000021484 | Lman2         | 66890     | turquoise    |
| ENSMUSG00000032411 | Tfdp2         | 211586    | black        |
| ENSMUSG00000032412 | Atp1b3        | 11933     | brown        |
| ENSMUSG00000021486 | Prelid1       | 66494     | blue         |
| ENSMUSG00000032413 | Rasa2         | 114713    | blue         |
| ENSMUSG00000021488 | Nsd1          | 18193     | brown        |
| ENSMUSG00000032417 | Rwdd2a        | 69519     | turquoise    |
| ENSMUSG00000032418 | Me1           | 17436     | turquoise    |
| ENSMUSG00000099764 | NA            | NA        | black        |
| ENSMUSG00000039693 | Msantd3       | 66665     | cyan         |
| ENSMUSG00000108648 | NA            | NA        | turquoise    |
| ENSMUSG00000039697 | Ncoa7         | 211329    | turquoise    |
| ENSMUSG00000064080 | Fbln2         | 14115     | red          |
| ENSMUSG00000085521 | NA            | NA        | turquoise    |
| ENSMUSG00000064081 | NA            | NA        | pink         |
| ENSMUSG00000029186 | Pi4k2b        | 67073     | blue         |
| ENSMUSG00000067869 | NA            | NA        | black        |
| ENSMUSG00000104913 | NA            | NA        | midnightblue |
| ENSMUSG00000035960 | Apex1         | 11792     | black        |
| ENSMUSG00000029189 | Sel1l3        | 231238    | blue         |
| ENSMUSG00000075012 | NA            | NA        | purple       |
| ENSMUSG00000057359 | NA            | NA        | turquoise    |
| ENSMUSG00000075014 | NA            | NA        | turquoise    |
| ENSMUSG00000025450 | NA            | NA        | turquoise    |

|                    |             |        |             |
|--------------------|-------------|--------|-------------|
| ENSMUSG00000075015 | NA          | NA     | turquoise   |
| ENSMUSG00000025451 | Paip1       | 218693 | green       |
| ENSMUSG00000092257 | NA          | NA     | greenyellow |
| ENSMUSG00000032180 | Tmed1       | 17083  | turquoise   |
| ENSMUSG00000042694 | Obfc1       | 108689 | blue        |
| ENSMUSG00000025453 | NA          | NA     | green       |
| ENSMUSG00000032181 | Scg3        | 20255  | purple      |
| ENSMUSG00000032182 | Yipf2       | 74766  | blue        |
| ENSMUSG00000035967 | Ddx26b      | 236790 | turquoise   |
| ENSMUSG00000032184 | Lysmd2      | 70082  | turquoise   |
| ENSMUSG00000035969 | Rusc2       | 100213 | turquoise   |
| ENSMUSG00000032185 | Carm1       | 59035  | blue        |
| ENSMUSG00000032186 | Tmod2       | 50876  | turquoise   |
| ENSMUSG00000042699 | Dhx9        | 13211  | blue        |
| ENSMUSG00000032187 | Smarca4     | 20586  | black       |
| ENSMUSG00000021720 | NA          | NA     | turquoise   |
| ENSMUSG00000000282 | Mnt         | 17428  | lightcyan   |
| ENSMUSG00000078566 | Bnip3       | 12176  | yellow      |
| ENSMUSG00000053390 | Zfp952      | 240067 | turquoise   |
| ENSMUSG00000039934 | Gsap        | 212167 | turquoise   |
| ENSMUSG00000029422 | Rsrc2       | 208606 | blue        |
| ENSMUSG00000081562 | NA          | NA     | turquoise   |
| ENSMUSG00000029426 | NA          | NA     | yellow      |
| ENSMUSG00000046667 | Rbm12b1     | 72397  | turquoise   |
| ENSMUSG00000046668 | Cxxc5       | 67393  | yellow      |
| ENSMUSG00000029427 | Zcchc8      | 70650  | green       |
| ENSMUSG00000036155 | Mgat5       | 107895 | turquoise   |
| ENSMUSG00000071052 | NA          | NA     | blue        |
| ENSMUSG00000100954 | NA          | NA     | turquoise   |
| ENSMUSG00000053398 | Phgdh       | 236539 | yellow      |
| ENSMUSG00000071054 | Safb        | 224903 | green       |
| ENSMUSG00000036158 | Prickle1    | 106042 | turquoise   |
| ENSMUSG00000064326 | Siva1       | 30954  | red         |
| ENSMUSG00000014763 | Fam120b     | 67544  | turquoise   |
| ENSMUSG00000021493 | Pdlim7      | 67399  | turquoise   |
| ENSMUSG00000021494 | Ddx41       | 72935  | blue        |
| ENSMUSG00000014767 | Tbp         | 21374  | red         |
| ENSMUSG00000021495 | Fam193b     | 212483 | yellow      |
| ENSMUSG00000032422 | Snx14       | 244962 | yellow      |
| ENSMUSG00000021496 | Pcbd2       | 72562  | green       |
| ENSMUSG00000032423 | Syncrip     | 56403  | blue        |
| ENSMUSG00000014769 | Psmb1       | 19170  | brown       |
| ENSMUSG00000021497 | Txndc15     | 69672  | turquoise   |
| ENSMUSG00000099779 | NA          | NA     | green       |
| ENSMUSG00000067870 | NA          | NA     | black       |
| ENSMUSG00000029190 | D5Erttd579e | 320661 | turquoise   |
| ENSMUSG00000029191 | Rfc1        | 19687  | green       |
| ENSMUSG00000067873 | Htatsf1     | 72459  | red         |
| ENSMUSG00000029192 | Tbc1d14     | 100855 | turquoise   |
| ENSMUSG00000075020 | NA          | NA     | turquoise   |
| ENSMUSG00000104923 | NA          | NA     | turquoise   |
| ENSMUSG00000029198 | Grpel1      | 17713  | turquoise   |
| ENSMUSG00000057367 | Birc2       | 11797  | turquoise   |
| ENSMUSG00000104924 | NA          | NA     | turquoise   |

|                     |               |        |           |
|---------------------|---------------|--------|-----------|
| ENSMUSG00000029199  | Lias          | 79464  | turquoise |
| ENSMUSG00000018733  | Pex12         | 103737 | turquoise |
| ENSMUSG00000018736  | Ndel1         | 83431  | turquoise |
| ENSMUSG00000032192  | NA            | NA     | turquoise |
| ENSMUSG00000081800  | NA            | NA     | brown     |
| ENSMUSG00000032193  | Ldlr          | 16835  | turquoise |
| ENSMUSG00000025465  | Echs1         | 93747  | turquoise |
| ENSMUSG00000032194  | Kank2         | 235041 | yellow    |
| ENSMUSG00000025466  | NA            | NA     | yellow    |
| ENSMUSG00000008226  | Scrn3         | 74616  | turquoise |
| ENSMUSG00000081805  | NA            | NA     | turquoise |
| ENSMUSG00000032199  | Polr2m        | 28015  | green     |
| ENSMUSG00000021731  | Mrps30        | 59054  | red       |
| ENSMUSG00000021733  | Slc4a7        | 218756 | yellow    |
| ENSMUSG00000000295  | Hddc2         | 69692  | turquoise |
| ENSMUSG00000021737  | Psm6          | 66413  | turquoise |
| ENSMUSG00000021738  | Atxn7         | 246103 | turquoise |
| ENSMUSG00000078570  | 1110065P20Rik | 68920  | turquoise |
| ENSMUSG00000078572  | 1810043H04Rik | 208501 | black     |
| ENSMUSG00000078578  | Ube2d3        | 66105  | blue      |
| ENSMUSG000000104696 | NA            | NA     | turquoise |
| ENSMUSG00000029430  | Ran           | 19384  | red       |
| ENSMUSG00000039943  | Plcb4         | 18798  | turquoise |
| ENSMUSG00000046671  | Mtfr1l        | 76824  | turquoise |
| ENSMUSG000000104699 | NA            | NA     | black     |
| ENSMUSG00000074841  | NA            | NA     | turquoise |
| ENSMUSG00000029432  | Gbas          | 14467  | turquoise |
| ENSMUSG00000036160  | Surf6         | 20935  | turquoise |
| ENSMUSG00000029433  | Diablo        | 66593  | green     |
| ENSMUSG00000046675  | NA            | NA     | yellow    |
| ENSMUSG00000029434  | Vps33a        | 77573  | blue      |
| ENSMUSG00000081572  | NA            | NA     | tan       |
| ENSMUSG00000057604  | Lmcd1         | 30937  | brown     |
| ENSMUSG00000057605  | NA            | NA     | black     |
| ENSMUSG00000081575  | NA            | NA     | yellow    |
| ENSMUSG00000029438  | Bcl7a         | 77045  | blue      |
| ENSMUSG00000046679  | C87436        | 232196 | turquoise |
| ENSMUSG00000036167  | Pphn1         | 223828 | red       |
| ENSMUSG00000029439  | Sfswap        | 231769 | turquoise |
| ENSMUSG00000071064  | Zfp827        | 622675 | blue      |
| ENSMUSG00000064337  | NA            | NA     | yellow    |
| ENSMUSG000000100967 | NA            | NA     | brown     |
| ENSMUSG00000081578  | NA            | NA     | turquoise |
| ENSMUSG00000014773  | Dll1          | 13388  | red       |
| ENSMUSG00000064339  | NA            | NA     | yellow    |
| ENSMUSG00000025702  | 7-Mar         | 71779  | turquoise |
| ENSMUSG00000032431  | Crtap         | 56693  | yellow    |
| ENSMUSG00000014776  | Nol3          | 78688  | turquoise |
| ENSMUSG00000004263  | Atn1          | 13498  | yellow    |
| ENSMUSG00000060600  | Eno3          | 13808  | blue      |
| ENSMUSG00000004264  | Phb2          | 12034  | green     |
| ENSMUSG00000060601  | Nr1h2         | 22260  | yellow    |
| ENSMUSG00000032434  | Cmtm6         | 67213  | blue      |
| ENSMUSG00000032435  | NA            | NA     | red       |

|                    |               |        |           |
|--------------------|---------------|--------|-----------|
| ENSMUSG00000004268 | Emg1          | 14791  | red       |
| ENSMUSG00000032437 | Stt3b         | 68292  | turquoise |
| ENSMUSG00000000538 | Tom1l2        | 216810 | yellow    |
| ENSMUSG00000078812 | Eif5a         | 276770 | black     |
| ENSMUSG00000078813 | Leng1         | 69757  | turquoise |
| ENSMUSG00000057375 | Yipf1         | 230584 | turquoise |
| ENSMUSG00000067889 | Sptbn2        | 20743  | turquoise |
| ENSMUSG00000068303 | NA            | NA     | turquoise |
| ENSMUSG00000092274 | NA            | NA     | turquoise |
| ENSMUSG00000075033 | Nxpe3         | 385658 | turquoise |
| ENSMUSG00000018740 | Slc25a35      | 71998  | yellow    |
| ENSMUSG00000025470 | Zfp511        | 69752  | pink      |
| ENSMUSG00000070880 | Gad1          | 14415  | yellow    |
| ENSMUSG00000053641 | Dennd4a       | 102442 | turquoise |
| ENSMUSG00000025474 | Tubgcp2       | 74237  | purple    |
| ENSMUSG00000070883 | Ccdc173       | 75051  | turquoise |
| ENSMUSG00000081810 | NA            | NA     | lightcyan |
| ENSMUSG00000025475 | Adgra1        | 52389  | turquoise |
| ENSMUSG00000036402 | Gng12         | 14701  | turquoise |
| ENSMUSG00000053644 | Aldh7a1       | 110695 | turquoise |
| ENSMUSG00000043131 | Mob1a         | 232157 | brown     |
| ENSMUSG00000060373 | Hrnp3c        | 15381  | black     |
| ENSMUSG00000025477 | Inpp5a        | 212111 | turquoise |
| ENSMUSG00000053646 | Plxnb1        | 235611 | turquoise |
| ENSMUSG00000025478 | Dpysl4        | 26757  | turquoise |
| ENSMUSG00000071302 | 2610044O15Ril | 72139  | turquoise |
| ENSMUSG00000081816 | NA            | NA     | blue      |
| ENSMUSG00000071303 | NA            | NA     | turquoise |
| ENSMUSG00000060376 | Bckdha        | 12039  | purple    |
| ENSMUSG00000060377 | NA            | NA     | black     |
| ENSMUSG00000021741 | NA            | NA     | blue      |
| ENSMUSG00000004500 | Zfp324        | 243834 | grey60    |
| ENSMUSG00000081819 | NA            | NA     | turquoise |
| ENSMUSG00000021743 | Fezf2         | 54713  | turquoise |
| ENSMUSG00000021745 | Ptprg         | 19270  | grey60    |
| ENSMUSG00000021748 | Pdhb          | 68263  | turquoise |
| ENSMUSG00000004508 | Gab2          | 14389  | turquoise |
| ENSMUSG00000078584 | AU022252      | 230696 | turquoise |
| ENSMUSG00000039952 | Dag1          | 13138  | yellow    |
| ENSMUSG00000029440 | Psmc9         | 67151  | green     |
| ENSMUSG00000039953 | Clstn1        | 65945  | yellow    |
| ENSMUSG00000105124 | NA            | NA     | lightcyan |
| ENSMUSG00000064340 | NA            | NA     | turquoise |
| ENSMUSG00000064341 | NA            | NA     | yellow    |
| ENSMUSG00000039958 | Mettl20       | 320204 | turquoise |
| ENSMUSG00000064342 | NA            | NA     | turquoise |
| ENSMUSG00000029446 | Pspk          | 100678 | yellow    |
| ENSMUSG00000039959 | Hip1          | 215114 | turquoise |
| ENSMUSG00000064343 | NA            | NA     | turquoise |
| ENSMUSG00000029447 | NA            | NA     | black     |
| ENSMUSG00000064344 | NA            | NA     | yellow    |
| ENSMUSG00000071072 | Ptges3        | 56351  | green     |
| ENSMUSG00000064345 | NA            | NA     | turquoise |
| ENSMUSG00000071073 | Lrrc73        | 224813 | turquoise |



|                    |               |        |             |
|--------------------|---------------|--------|-------------|
| ENSMUSG00000071074 | Yipf3         | 28064  | blue        |
| ENSMUSG00000064347 | NA            | NA     | pink        |
| ENSMUSG00000082002 | NA            | NA     | turquoise   |
| ENSMUSG00000064348 | NA            | NA     | pink        |
| ENSMUSG00000071076 | Jund          | 16478  | green       |
| ENSMUSG00000004270 | Lpcat3        | 14792  | yellow      |
| ENSMUSG00000064349 | NA            | NA     | pink        |
| ENSMUSG00000071078 | Nr2c2ap       | 75692  | blue        |
| ENSMUSG00000032443 | NA            | NA     | turquoise   |
| ENSMUSG00000015202 | Cnksr3        | 215748 | turquoise   |
| ENSMUSG00000050103 | Agmo          | 319660 | yellow      |
| ENSMUSG00000032449 | Slc25a36      | 192287 | turquoise   |
| ENSMUSG00000050107 | Gsg2          | 14841  | magenta     |
| ENSMUSG00000075040 | Zfp408        | 381410 | turquoise   |
| ENSMUSG00000092281 | NA            | NA     | red         |
| ENSMUSG00000057388 | NA            | NA     | green       |
| ENSMUSG00000018750 | Zbtb4         | 75580  | turquoise   |
| ENSMUSG00000035992 | Frip1         | 216742 | brown       |
| ENSMUSG00000092289 | NA            | NA     | turquoise   |
| ENSMUSG00000036411 | 9530077C05Rik | 68283  | green       |
| ENSMUSG00000025484 | Bet1l         | 54399  | turquoise   |
| ENSMUSG00000043140 | Tmem186       | 66690  | pink        |
| ENSMUSG00000025485 | Ric8          | 101489 | turquoise   |
| ENSMUSG00000025486 | Sirt3         | 64384  | turquoise   |
| ENSMUSG00000025487 | NA            | NA     | green       |
| ENSMUSG00000081824 | NA            | NA     | yellow      |
| ENSMUSG00000021750 | Fam107a       | 268709 | red         |
| ENSMUSG00000021752 | Kctd6         | 71393  | turquoise   |
| ENSMUSG00000021754 | Map3k1        | 26401  | blue        |
| ENSMUSG00000021756 | Il6st         | 16195  | blue        |
| ENSMUSG00000021759 | Plpp1         | 19012  | turquoise   |
| ENSMUSG00000078592 | NA            | NA     | greenyellow |
| ENSMUSG00000096252 | NA            | NA     | green       |
| ENSMUSG00000039960 | Rhou          | 69581  | yellow      |
| ENSMUSG00000096255 | Dynlt1b       | 21648  | blue        |
| ENSMUSG00000046691 | Chtf8         | 214987 | red         |
| ENSMUSG00000036180 | Gatad2a       | 234366 | blue        |
| ENSMUSG00000036181 | NA            | NA     | turquoise   |
| ENSMUSG00000064350 | NA            | NA     | pink        |
| ENSMUSG00000074863 | NA            | NA     | turquoise   |
| ENSMUSG00000029454 | Mapkapk5      | 17165  | turquoise   |
| ENSMUSG00000039967 | Zfp292        | 30046  | blue        |
| ENSMUSG00000064351 | NA            | NA     | yellow      |
| ENSMUSG00000029455 | NA            | NA     | greenyellow |
| ENSMUSG00000039968 | Rsb1l         | 242860 | blue        |
| ENSMUSG00000064352 | NA            | NA     | turquoise   |
| ENSMUSG00000029456 | Acad10        | 71985  | brown       |
| ENSMUSG00000064354 | NA            | NA     | yellow      |
| ENSMUSG00000074867 | Zfp808        | 630579 | turquoise   |
| ENSMUSG00000029458 | Brap          | 72399  | brown       |
| ENSMUSG00000036186 | Fam69b        | 56279  | turquoise   |
| ENSMUSG00000074868 | NA            | NA     | yellow      |
| ENSMUSG00000071083 | NA            | NA     | brown       |
| ENSMUSG00000064356 | NA            | NA     | blue        |

|                    |               |        |              |
|--------------------|---------------|--------|--------------|
| ENSMUSG00000036188 | Ankmy2        | 217473 | turquoise    |
| ENSMUSG00000064357 | NA            | NA     | yellow       |
| ENSMUSG00000064358 | NA            | NA     | yellow       |
| ENSMUSG00000082013 | NA            | NA     | pink         |
| ENSMUSG00000042962 | NA            | NA     | blue         |
| ENSMUSG00000025722 | Wdr73         | 71968  | brown        |
| ENSMUSG00000082016 | NA            | NA     | turquoise    |
| ENSMUSG00000025724 | Sec11a        | 56529  | blue         |
| ENSMUSG00000004285 | Atp6v1f       | 66144  | midnightblue |
| ENSMUSG00000015214 | Mtmr1         | 53332  | turquoise    |
| ENSMUSG00000025728 | Pigq          | 14755  | turquoise    |
| ENSMUSG00000032458 | Copb2         | 50797  | blue         |
| ENSMUSG00000015217 | Hmgb3         | 15354  | red          |
| ENSMUSG00000032459 | Mrps22        | 64655  | red          |
| ENSMUSG00000050114 | Prdx6b        | 320769 | greenyellow  |
| ENSMUSG00000000552 | Zfp385a       | 29813  | yellow       |
| ENSMUSG00000057396 | Zfp759        | 268670 | turquoise    |
| ENSMUSG00000068324 | NA            | NA     | turquoise    |
| ENSMUSG00000075053 | NA            | NA     | blue         |
| ENSMUSG00000085566 | NA            | NA     | turquoise    |
| ENSMUSG00000075054 | Yae1d1        | 67008  | blue         |
| ENSMUSG00000018761 | Mpdu1         | 24070  | midnightblue |
| ENSMUSG00000085568 | Gm14858       | 434825 | turquoise    |
| ENSMUSG00000068328 | Aup1          | 11993  | yellow       |
| ENSMUSG00000068329 | Htra2         | 64704  | blue         |
| ENSMUSG00000018765 | Fxr2          | 23879  | pink         |
| ENSMUSG00000046934 | Csl           | 71832  | turquoise    |
| ENSMUSG00000025495 | NA            | NA     | turquoise    |
| ENSMUSG00000081833 | NA            | NA     | turquoise    |
| ENSMUSG00000043153 | Ispd          | 75847  | blue         |
| ENSMUSG00000081834 | NA            | NA     | turquoise    |
| ENSMUSG00000043154 | Ppp2r3a       | 235542 | turquoise    |
| ENSMUSG00000025499 | Hras          | 15461  | turquoise    |
| ENSMUSG00000036427 | NA            | NA     | turquoise    |
| ENSMUSG00000021760 | Gpx8          | 69590  | turquoise    |
| ENSMUSG00000021764 | Ndufs4        | 17993  | blue         |
| ENSMUSG00000011254 | Thg1l         | 66628  | brown        |
| ENSMUSG00000021767 | Kat6b         | 54169  | turquoise    |
| ENSMUSG00000011257 | Pabpc4        | 230721 | turquoise    |
| ENSMUSG00000079020 | Slc45a4       | 106068 | turquoise    |
| ENSMUSG00000068099 | 1500009C09Rik | 76505  | turquoise    |
| ENSMUSG00000029461 | Fam168a       | 319604 | turquoise    |
| ENSMUSG00000105143 | NA            | NA     | blue         |
| ENSMUSG00000105144 | NA            | NA     | turquoise    |
| ENSMUSG00000029462 | Vps29         | 56433  | blue         |
| ENSMUSG00000039976 | Tbc1d16       | 207592 | turquoise    |
| ENSMUSG00000029463 | NA            | NA     | blue         |
| ENSMUSG00000064360 | NA            | NA     | blue         |
| ENSMUSG00000036192 | Rorb          | 225998 | greenyellow  |
| ENSMUSG00000029464 | Gpn3          | 68080  | brown        |
| ENSMUSG00000105147 | NA            | NA     | tan          |
| ENSMUSG00000029465 | Arpc3         | 56378  | blue         |
| ENSMUSG00000029466 | Anapc7        | 56317  | green        |
| ENSMUSG00000064363 | NA            | NA     | yellow       |

|                    |               |    |        |              |
|--------------------|---------------|----|--------|--------------|
| ENSMUSG00000029467 | Atp2a2        |    | 11938  | turquoise    |
| ENSMUSG00000047123 | Ticam1        |    | 106759 | yellow       |
| ENSMUSG00000029468 | P2rx7         |    | 18439  | turquoise    |
| ENSMUSG00000036197 | Gxylt1        |    | 223827 | cyan         |
| ENSMUSG00000057637 | Prdm2         |    | 110593 | pink         |
| ENSMUSG00000029469 | Ift81         |    | 12589  | turquoise    |
| ENSMUSG00000064367 | NA            | NA |        | yellow       |
| ENSMUSG00000047126 | Cltc          |    | 67300  | blue         |
| ENSMUSG00000036199 | Ndufa13       |    | 67184  | midnightblue |
| ENSMUSG00000064368 | NA            | NA |        | yellow       |
| ENSMUSG00000025730 | Rab40c        |    | 224624 | blue         |
| ENSMUSG00000064369 | NA            | NA |        | turquoise    |
| ENSMUSG00000025731 | 0610011F06Rik |    | 68347  | grey60       |
| ENSMUSG00000101413 | NA            | NA |        | lightcyan    |
| ENSMUSG00000025732 | Fam195a       |    | 68241  | yellow       |
| ENSMUSG00000025733 | Rhot2         |    | 214952 | turquoise    |
| ENSMUSG00000032462 | NA            | NA |        | blue         |
| ENSMUSG00000032463 | Faim          |    | 23873  | blue         |
| ENSMUSG00000015222 | Map2          |    | 17756  | turquoise    |
| ENSMUSG00000082028 | NA            | NA |        | blue         |
| ENSMUSG00000025736 | Jmjd8         |    | 72106  | brown        |
| ENSMUSG00000082029 | NA            | NA |        | green        |
| ENSMUSG00000025737 | Wdr24         |    | 268933 | yellow       |
| ENSMUSG00000042978 | Sbk1          |    | 104175 | turquoise    |
| ENSMUSG00000015224 | Cyp2j9        |    | 74519  | blue         |
| ENSMUSG00000025738 | Fbxl16        |    | 214931 | grey60       |
| ENSMUSG00000053907 | Mat2a         |    | 232087 | midnightblue |
| ENSMUSG00000060636 | Rpl35a        |    | 57808  | black        |
| ENSMUSG00000032468 | Armc8         |    | 74125  | turquoise    |
| ENSMUSG00000032469 | Dbr1          |    | 83703  | salmon       |
| ENSMUSG00000000560 | NA            | NA |        | grey60       |
| ENSMUSG00000060639 | NA            | NA |        | blue         |
| ENSMUSG00000000561 | Wdr77         |    | 70465  | red          |
| ENSMUSG00000000563 | Atp5f1        |    | 11950  | blue         |
| ENSMUSG00000108694 | NA            | NA |        | pink         |
| ENSMUSG00000108696 | NA            | NA |        | cyan         |
| ENSMUSG00000000567 | Sox9          |    | 20682  | red          |
| ENSMUSG00000000568 | Hnrnpd        |    | 11991  | green        |
| ENSMUSG00000104960 | Snhg8         |    | 69895  | black        |
| ENSMUSG00000085572 | NA            | NA |        | lightcyan    |
| ENSMUSG00000104963 | NA            | NA |        | yellow       |
| ENSMUSG00000018770 | Atp5g3        |    | 228033 | turquoise    |
| ENSMUSG00000068335 | Dok1          |    | 13448  | turquoise    |
| ENSMUSG00000018774 | Cd68          |    | 12514  | blue         |
| ENSMUSG00000029701 | Rbm28         |    | 68272  | green        |
| ENSMUSG00000029703 | Lrwd1         |    | 71735  | blue         |
| ENSMUSG00000036432 | Siah2         |    | 20439  | turquoise    |
| ENSMUSG00000029705 | Cux1          |    | 13047  | green        |
| ENSMUSG00000101188 | NA            | NA |        | black        |
| ENSMUSG00000043162 | NA            | NA |        | turquoise    |
| ENSMUSG00000046947 | Adck2         |    | 57869  | turquoise    |
| ENSMUSG00000036435 | Exoc1         |    | 69940  | red          |
| ENSMUSG00000046949 | Nqo2          |    | 18105  | brown        |
| ENSMUSG00000029708 | Gcc1          |    | 74375  | turquoise    |

|                    |         |    |        |             |
|--------------------|---------|----|--------|-------------|
| ENSMUSG00000036438 | Calm2   |    | 12314  | black       |
| ENSMUSG00000021770 | Samd8   |    | 67630  | turquoise   |
| ENSMUSG00000081848 | NA      | NA |        | turquoise   |
| ENSMUSG00000021771 | Vdac2   |    | 22334  | brown       |
| ENSMUSG00000004530 | Coro1c  |    | 23790  | red         |
| ENSMUSG00000021772 | Nkiras1 |    | 69721  | turquoise   |
| ENSMUSG00000071337 | Tia1    |    | 21841  | blue        |
| ENSMUSG00000021774 | Ube2e1  |    | 22194  | green       |
| ENSMUSG00000032702 | Kank1   |    | 107351 | green       |
| ENSMUSG00000021775 | Nr1d2   |    | 353187 | turquoise   |
| ENSMUSG00000004535 | Tax1bp1 |    | 52440  | turquoise   |
| ENSMUSG00000032705 | Exd2    |    | 97827  | blue        |
| ENSMUSG00000000804 | Usp32   |    | 237898 | yellow      |
| ENSMUSG00000039982 | Dtx4    |    | 207521 | turquoise   |
| ENSMUSG00000029470 | P2rx4   |    | 18438  | turquoise   |
| ENSMUSG00000039983 | Ccdc32  |    | 269336 | turquoise   |
| ENSMUSG00000079036 | NA      | NA |        | green       |
| ENSMUSG00000029471 | Camkk2  |    | 207565 | turquoise   |
| ENSMUSG00000029472 | Anapc5  |    | 59008  | green       |
| ENSMUSG00000039985 | Fam60a  |    | 56306  | red         |
| ENSMUSG00000079037 | Prnp    |    | 19122  | red         |
| ENSMUSG00000079038 | NA      | NA |        | yellow      |
| ENSMUSG00000064370 | NA      | NA |        | yellow      |
| ENSMUSG00000029474 | NA      | NA |        | turquoise   |
| ENSMUSG00000039987 | Phtf2   |    | 68770  | turquoise   |
| ENSMUSG00000085811 | NA      | NA |        | turquoise   |
| ENSMUSG00000074884 | Serf2   |    | 378702 | green       |
| ENSMUSG00000029475 | Kdm2b   |    | 30841  | brown       |
| ENSMUSG00000039988 | NA      | NA |        | brown       |
| ENSMUSG00000064372 | NA      | NA |        | turquoise   |
| ENSMUSG00000039989 | Cbx4    |    | 12418  | turquoise   |
| ENSMUSG00000092540 | NA      | NA |        | turquoise   |
| ENSMUSG00000085812 | NA      | NA |        | turquoise   |
| ENSMUSG00000064373 | Sepp1   |    | 20363  | purple      |
| ENSMUSG00000074886 | Grk6    |    | 26385  | green       |
| ENSMUSG00000029478 | Ncor2   |    | 20602  | black       |
| ENSMUSG00000057649 | Brd9    |    | 105246 | blue        |
| ENSMUSG00000032470 | Mras    |    | 17532  | greenyellow |
| ENSMUSG00000047139 | Cd24a   |    | 12484  | cyan        |
| ENSMUSG00000025743 | Sdc3    |    | 20970  | turquoise   |
| ENSMUSG00000025745 | Hadha   |    | 97212  | turquoise   |
| ENSMUSG00000032475 | Nck1    |    | 17973  | brown       |
| ENSMUSG00000025747 | Tyms    |    | 22171  | red         |
| ENSMUSG00000053916 | Nanp    |    | 67311  | brown       |
| ENSMUSG00000050132 | Sarm1   |    | 237868 | blue        |
| ENSMUSG00000032477 | Cdc25a  |    | 12530  | red         |
| ENSMUSG00000032478 | Nme6    |    | 54369  | turquoise   |
| ENSMUSG00000060647 | NA      | NA |        | turquoise   |
| ENSMUSG00000032479 | Map4    |    | 17758  | turquoise   |
| ENSMUSG00000000579 | NA      | NA |        | blue        |
| ENSMUSG00000078851 | NA      | NA |        | turquoise   |
| ENSMUSG00000104973 | NA      | NA |        | turquoise   |
| ENSMUSG00000029710 | Ephb4   |    | 13846  | turquoise   |
| ENSMUSG00000086004 | NA      | NA |        | turquoise   |

|                    |               |    |        |              |
|--------------------|---------------|----|--------|--------------|
| ENSMUSG00000029713 | Gnb2          |    | 14693  | midnightblue |
| ENSMUSG00000036442 | Thap11        |    | 59016  | blue         |
| ENSMUSG00000029714 | Gigyf1        |    | 57330  | turquoise    |
| ENSMUSG00000029715 | Pop7          |    | 74097  | green        |
| ENSMUSG00000081855 | NA            | NA |        | black        |
| ENSMUSG00000071343 | NA            | NA |        | greenyellow  |
| ENSMUSG00000021782 | Dlg5          |    | 71228  | turquoise    |
| ENSMUSG00000021785 | Ngly1         |    | 59007  | brown        |
| ENSMUSG00000032712 | 2810474O19Ril |    | 67246  | turquoise    |
| ENSMUSG00000022200 | Golph3        |    | 66629  | turquoise    |
| ENSMUSG00000021786 | Oxsm          |    | 71147  | turquoise    |
| ENSMUSG00000022201 | Zfr           |    | 22763  | midnightblue |
| ENSMUSG00000032714 | Syde1         |    | 71709  | turquoise    |
| ENSMUSG00000022203 | Efs           |    | 13644  | green        |
| ENSMUSG00000022204 | Ngdn          |    | 68966  | blue         |
| ENSMUSG00000022205 | Sub1          |    | 20024  | turquoise    |
| ENSMUSG00000032718 | Mansc1        |    | 67729  | turquoise    |
| ENSMUSG00000000811 | Txnrd3        |    | 232223 | turquoise    |
| ENSMUSG00000039990 | Edrf1         |    | 214764 | blue         |
| ENSMUSG00000079043 | NA            | NA |        | turquoise    |
| ENSMUSG00000029480 | Dhx37         |    | 208144 | green        |
| ENSMUSG00000074890 | Lcmt2         |    | 329504 | blue         |
| ENSMUSG00000029482 | Aacs          |    | 78894  | turquoise    |
| ENSMUSG00000047141 | Zfp654        |    | 72020  | turquoise    |
| ENSMUSG00000029486 | Mrpl1         |    | 94061  | blue         |
| ENSMUSG00000074896 | Ifit3         |    | 15959  | turquoise    |
| ENSMUSG00000057657 | NA            | NA |        | red          |
| ENSMUSG00000075312 | NA            | NA |        | turquoise    |
| ENSMUSG00000101431 | NA            | NA |        | yellow       |
| ENSMUSG00000047146 | Tet1          |    | 52463  | blue         |
| ENSMUSG00000092557 | NA            | NA |        | pink         |
| ENSMUSG00000042992 | Borcs5        |    | 67774  | turquoise    |
| ENSMUSG00000082044 | NA            | NA |        | black        |
| ENSMUSG00000092558 | Med20         |    | 56771  | blue         |
| ENSMUSG00000082045 | NA            | NA |        | brown        |
| ENSMUSG00000032480 | Dhx30         |    | 72831  | brown        |
| ENSMUSG00000032481 | Smarcc1       |    | 20588  | red          |
| ENSMUSG00000032482 | Cspg5         |    | 29873  | red          |
| ENSMUSG00000043411 | Usp48         |    | 170707 | turquoise    |
| ENSMUSG00000015243 | Abca1         |    | 11303  | yellow       |
| ENSMUSG00000042997 | NA            | NA |        | turquoise    |
| ENSMUSG00000101439 | NA            | NA |        | turquoise    |
| ENSMUSG00000032485 | Scap          |    | 235623 | turquoise    |
| ENSMUSG00000025757 | Hspa4l        |    | 18415  | brown        |
| ENSMUSG00000025758 | Plk4          |    | 20873  | magenta      |
| ENSMUSG00000025759 | Mfsd8         |    | 72175  | yellow       |
| ENSMUSG00000043415 | Otud1         |    | 71198  | turquoise    |
| ENSMUSG00000015247 | Nipsnap3b     |    | 66536  | green        |
| ENSMUSG00000060657 | Marf1         |    | 223989 | turquoise    |
| ENSMUSG00000053929 | Cyhr1         |    | 54151  | brown        |
| ENSMUSG00000032489 | Kif9          |    | 16578  | turquoise    |
| ENSMUSG00000050144 | Slc25a44      |    | 229517 | greenyellow  |
| ENSMUSG00000000581 | C1d           |    | 57316  | green        |
| ENSMUSG00000050148 | Ubqln2        |    | 54609  | turquoise    |

|                     |          |           |              |
|---------------------|----------|-----------|--------------|
| ENSMUSG00000078861  | NA       | NA        | turquoise    |
| ENSMUSG00000078862  | Gm14326  | 665211    | turquoise    |
| ENSMUSG00000078864  | NA       | NA        | green        |
| ENSMUSG00000078866  | NA       | NA        | turquoise    |
| ENSMUSG00000078867  | NA       | NA        | turquoise    |
| ENSMUSG00000029720  | Gm20605  | 100316903 | turquoise    |
| ENSMUSG00000046962  | Zbtb21   | 114565    | turquoise    |
| ENSMUSG00000036450  | Hif1an   | 319594    | brown        |
| ENSMUSG00000029722  | Agfg2    | 231801    | green        |
| ENSMUSG00000018796  | Acsl1    | 14081     | blue         |
| ENSMUSG00000019210  | Atp6v1e1 | 11973     | turquoise    |
| ENSMUSG00000029723  | Tsc22d4  | 78829     | red          |
| ENSMUSG00000036452  | Arhgap26 | 71302     | green        |
| ENSMUSG00000105406  | NA       | NA        | grey60       |
| ENSMUSG00000029725  | Ppp1r35  | 69871     | turquoise    |
| ENSMUSG00000105408  | NA       | NA        | turquoise    |
| ENSMUSG00000029726  | Mepce    | 231803    | turquoise    |
| ENSMUSG00000043183  | Simc1    | 319719    | turquoise    |
| ENSMUSG000000081865 | NA       | NA        | salmon       |
| ENSMUSG00000029729  | Zkscan1  | 74570     | turquoise    |
| ENSMUSG00000054115  | Skp2     | 27401     | salmon       |
| ENSMUSG00000021792  | Fam213a  | 70564     | red          |
| ENSMUSG00000021794  | Glud1    | 14661     | greenyellow  |
| ENSMUSG00000071359  | Tbpl1    | 237336    | blue         |
| ENSMUSG00000022210  | Dhrs4    | 28200     | midnightblue |
| ENSMUSG00000021796  | Bmpr1a   | 12166     | turquoise    |
| ENSMUSG00000022211  | Lrrc16b  | 268747    | turquoise    |
| ENSMUSG00000032724  | Abtb2    | 99382     | blue         |
| ENSMUSG00000004558  | Ndrg2    | 29811     | red          |
| ENSMUSG00000032727  | Mier3    | 218613    | blue         |
| ENSMUSG00000022214  | Dcaf11   | 28199     | blue         |
| ENSMUSG00000022216  | Psme1    | 19186     | turquoise    |
| ENSMUSG00000022217  | Emc9     | 85308     | yellow       |
| ENSMUSG00000000823  | Zfp512b  | 269401    | turquoise    |
| ENSMUSG00000000826  | Dnajc5   | 13002     | blue         |
| ENSMUSG00000000827  | Tpd52i2  | 66314     | brown        |
| ENSMUSG00000079056  | Kcnip3   | 56461     | green        |
| ENSMUSG00000079057  | NA       | NA        | turquoise    |
| ENSMUSG00000105176  | NA       | NA        | pink         |
| ENSMUSG00000047153  | Khynyn   | 219094    | turquoise    |
| ENSMUSG00000057666  | Gapdh    | 14433     | greenyellow  |
| ENSMUSG00000057667  | Bloc1s3  | 232946    | blue         |
| ENSMUSG00000029499  | Pxmp2    | 19301     | blue         |
| ENSMUSG00000092563  | NA       | NA        | turquoise    |
| ENSMUSG00000082051  | NA       | NA        | turquoise    |
| ENSMUSG00000092564  | BC051226 | 407803    | turquoise    |
| ENSMUSG00000047155  | Cyp4x1   | 81906     | green        |
| ENSMUSG00000082052  | NA       | NA        | turquoise    |
| ENSMUSG00000082054  | NA       | NA        | turquoise    |
| ENSMUSG00000075327  | Zbtb2    | 381990    | blue         |
| ENSMUSG00000025762  | Larp1b   | 214048    | turquoise    |
| ENSMUSG00000032491  | Nradd    | 67169     | pink         |
| ENSMUSG00000053931  | Cnn3     | 71994     | yellow       |
| ENSMUSG00000025764  | Jade1    | 269424    | magenta      |

|                    |           |           |             |
|--------------------|-----------|-----------|-------------|
| ENSMUSG00000025766 | D3Ert751e | 73852     | lightcyan   |
| ENSMUSG00000043424 | Eif3j2    | 100042807 | brown       |
| ENSMUSG00000032497 | Lrrfip2   | 71268     | blue        |
| ENSMUSG00000032498 | Mlh1      | 17350     | turquoise   |
| ENSMUSG00000000594 | Gm2a      | 14667     | blue        |
| ENSMUSG00000078870 | NA        | NA        | turquoise   |
| ENSMUSG00000001016 | Ilf2      | 67781     | red         |
| ENSMUSG00000001017 | Chtop     | 66511     | blue        |
| ENSMUSG00000001018 | Snapin    | 20615     | turquoise   |
| ENSMUSG00000089803 | NA        | NA        | blue        |
| ENSMUSG00000078877 | Gm14295   | 100039123 | yellow      |
| ENSMUSG00000078878 | Gm14305   | 100043387 | turquoise   |
| ENSMUSG00000089808 | NA        | NA        | greenyellow |
| ENSMUSG00000029730 | Mcm7      | 17220     | purple      |
| ENSMUSG00000036461 | Elf1      | 13709     | turquoise   |
| ENSMUSG00000081871 | NA        | NA        | lightcyan   |
| ENSMUSG00000043192 | NA        | NA        | turquoise   |
| ENSMUSG00000036466 | Megf11    | 214058    | grey60      |
| ENSMUSG00000092805 | NA        | NA        | turquoise   |
| ENSMUSG00000004561 | Mettl17   | 52535     | turquoise   |
| ENSMUSG00000004562 | Arhgef40  | 268739    | turquoise   |
| ENSMUSG00000032733 | Snx33     | 235406    | brown       |
| ENSMUSG00000004565 | Pnpla6    | 50767     | turquoise   |
| ENSMUSG00000004567 | Mcoln1    | 94178     | brown       |
| ENSMUSG00000022223 | Sdr39u1   | 654795    | turquoise   |
| ENSMUSG00000004568 | Arhgef18  | 102098    | turquoise   |
| ENSMUSG00000060904 | NA        | NA        | blue        |
| ENSMUSG00000032737 | Inpp1     | 16332     | blue        |
| ENSMUSG00000022228 | Zscan26   | 432731    | turquoise   |
| ENSMUSG00000079065 | BC005561  | 100042165 | blue        |
| ENSMUSG00000000838 | Fmr1      | 14265     | blue        |
| ENSMUSG00000079067 | NA        | NA        | red         |
| ENSMUSG00000057672 | Pkn1      | 320795    | turquoise   |
| ENSMUSG00000105189 | NA        | NA        | blue        |
| ENSMUSG00000068604 | NA        | NA        | tan         |
| ENSMUSG00000082061 | NA        | NA        | black       |
| ENSMUSG00000082062 | NA        | NA        | green       |
| ENSMUSG00000101452 | NA        | NA        | blue        |
| ENSMUSG00000082064 | NA        | NA        | turquoise   |
| ENSMUSG00000082066 | NA        | NA        | yellow      |
| ENSMUSG00000060671 | Atp8b2    | 54667     | turquoise   |
| ENSMUSG00000025777 | Gdap1     | 14545     | turquoise   |
| ENSMUSG00000036707 | Cab39     | 12283     | green       |
| ENSMUSG00000071604 | Fam189a2  | 381217    | turquoise   |
| ENSMUSG00000060679 | Mrps9     | 69527     | turquoise   |
| ENSMUSG00000001020 | S100a4    | 20198     | yellow      |
| ENSMUSG00000089810 | NA        | NA        | blue        |
| ENSMUSG00000078887 | NA        | NA        | turquoise   |
| ENSMUSG00000096544 | NA        | NA        | red         |
| ENSMUSG00000078889 | NA        | NA        | turquoise   |
| ENSMUSG00000046982 | Tshz1     | 110796    | blue        |
| ENSMUSG00000081880 | NA        | NA        | turquoise   |
| ENSMUSG00000046985 | Tapt1     | 231225    | turquoise   |
| ENSMUSG00000036473 | Ntn3      | 18209     | blue        |

|                    |              |           |              |
|--------------------|--------------|-----------|--------------|
| ENSMUSG00000019232 | NA           | NA        | greenyellow  |
| ENSMUSG00000081885 | NA           | NA        | cyan         |
| ENSMUSG00000081886 | NA           | NA        | greenyellow  |
| ENSMUSG00000081887 | NA           | NA        | turquoise    |
| ENSMUSG00000036478 | Btg1         | 12226     | turquoise    |
| ENSMUSG00000092814 | NA           | NA        | cyan         |
| ENSMUSG00000081888 | NA           | NA        | turquoise    |
| ENSMUSG00000032740 | Ccdc88a      | 108686    | yellow       |
| ENSMUSG00000047409 | Ctdspl       | 69274     | yellow       |
| ENSMUSG00000082305 | NA           | NA        | turquoise    |
| ENSMUSG00000032741 | Tpcn1        | 252972    | greenyellow  |
| ENSMUSG00000015501 | Hivep2       | 15273     | turquoise    |
| ENSMUSG00000082307 | NA           | NA        | turquoise    |
| ENSMUSG00000032743 | D430042O09Ri | 233865    | turquoise    |
| ENSMUSG00000082308 | NA           | NA        | turquoise    |
| ENSMUSG00000032745 | Gpbp1        | 73274     | black        |
| ENSMUSG00000022234 | Cct5         | 12465     | green        |
| ENSMUSG00000022235 | Cmb1         | 69574     | turquoise    |
| ENSMUSG00000105195 | NA           | NA        | lightcyan    |
| ENSMUSG00000082070 | NA           | NA        | red          |
| ENSMUSG00000082072 | NA           | NA        | turquoise    |
| ENSMUSG00000008540 | Mgst1        | 56615     | greenyellow  |
| ENSMUSG00000025781 | Atp5c1       | 11949     | midnightblue |
| ENSMUSG00000053950 | Adnp2        | 240442    | brown        |
| ENSMUSG00000101464 | NA           | NA        | turquoise    |
| ENSMUSG00000025782 | Taf3         | 209361    | turquoise    |
| ENSMUSG00000082076 | NA           | NA        | greenyellow  |
| ENSMUSG00000060680 | NA           | NA        | brown        |
| ENSMUSG00000025785 | Exosc7       | 66446     | red          |
| ENSMUSG00000036712 | Cyld         | 74256     | blue         |
| ENSMUSG00000060681 | Slc9a6       | 236794    | yellow       |
| ENSMUSG00000025786 | NA           | NA        | blue         |
| ENSMUSG00000026200 | Glb1l        | 74577     | turquoise    |
| ENSMUSG00000026201 | Stk16        | 20872     | blue         |
| ENSMUSG00000026202 | Tuba4a       | 22145     | purple       |
| ENSMUSG00000026203 | Dnajb2       | 56812     | brown        |
| ENSMUSG00000025789 | St8sia2      | 20450     | blue         |
| ENSMUSG00000043445 | Pgp          | 67078     | brown        |
| ENSMUSG00000061104 | Gm10094      | 100041953 | midnightblue |
| ENSMUSG00000026209 | Dnpep        | 13437     | turquoise    |
| ENSMUSG00000004815 | Dgkq         | 110524    | turquoise    |
| ENSMUSG00000001034 | Mapk7        | 23939     | green        |
| ENSMUSG00000001036 | Epn2         | 13855     | turquoise    |
| ENSMUSG00000078894 | NA           | NA        | turquoise    |
| ENSMUSG00000001039 | B9d1         | 27078     | blue         |
| ENSMUSG00000079311 | NA           | NA        | turquoise    |
| ENSMUSG00000089824 | NA           | NA        | green        |
| ENSMUSG00000078897 | NA           | NA        | turquoise    |
| ENSMUSG00000096557 | NA           | NA        | turquoise    |
| ENSMUSG00000079316 | Rab9         | 56382     | turquoise    |
| ENSMUSG00000046993 | NA           | NA        | turquoise    |
| ENSMUSG00000079317 | NA           | NA        | turquoise    |
| ENSMUSG00000105434 | NA           | NA        | turquoise    |
| ENSMUSG00000029752 | Asns         | 27053     | blue         |



|                    |            |           |              |
|--------------------|------------|-----------|--------------|
| ENSMUSG00000046994 | NA         | NA        | turquoise    |
| ENSMUSG00000081892 | NA         | NA        | turquoise    |
| ENSMUSG00000046997 | Spsb4      | 211949    | turquoise    |
| ENSMUSG00000057924 | NA         | NA        | brown        |
| ENSMUSG00000081895 | Rpl17-ps10 | 100042880 | black        |
| ENSMUSG00000047414 | Flrt2      | 399558    | yellow       |
| ENSMUSG00000047417 | Rexo1      | 66932     | blue         |
| ENSMUSG00000082317 | NA         | NA        | turquoise    |
| ENSMUSG00000022240 | Ctnnd2     | 18163     | yellow       |
| ENSMUSG00000022241 | Tars       | 110960    | red          |
| ENSMUSG00000032754 | Slc8b1     | 170756    | green        |
| ENSMUSG00000082319 | NA         | NA        | green        |
| ENSMUSG00000050410 | Tcf19      | 106795    | magenta      |
| ENSMUSG00000060923 | NA         | NA        | turquoise    |
| ENSMUSG00000022244 | Amacr      | 17117     | greenyellow  |
| ENSMUSG00000032757 | Bet1       | 12068     | turquoise    |
| ENSMUSG00000022247 | Brix1      | 67832     | blue         |
| ENSMUSG00000022248 | Rad1       | 19355     | brown        |
| ENSMUSG00000079083 | Jrkl       | 77532     | blue         |
| ENSMUSG00000079084 | NA         | NA        | turquoise    |
| ENSMUSG00000057691 | Zfp746     | 69228     | turquoise    |
| ENSMUSG00000047181 | Samd14     | 217125    | blue         |
| ENSMUSG00000057696 | NA         | NA        | tan          |
| ENSMUSG00000092595 | NA         | NA        | turquoise    |
| ENSMUSG00000047187 | Rab2a      | 59021     | turquoise    |
| ENSMUSG00000093011 | Mir100     | 723892    | turquoise    |
| ENSMUSG00000025791 | Pgm2       | 72157     | blue         |
| ENSMUSG00000025792 | NA         | NA        | magenta      |
| ENSMUSG00000068629 | NA         | NA        | turquoise    |
| ENSMUSG00000025793 | Hgs        | 15239     | green        |
| ENSMUSG00000075359 | NA         | NA        | blue         |
| ENSMUSG00000082087 | NA         | NA        | blue         |
| ENSMUSG00000025794 | Rpl14      | 67115     | black        |
| ENSMUSG00000053964 | Lgals4     | 16855     | brown        |
| ENSMUSG00000026211 | Obsl1      | 98733     | pink         |
| ENSMUSG00000026213 | Stk11ip    | 71728     | turquoise    |
| ENSMUSG00000061111 | Fam195b    | 192173    | midnightblue |
| ENSMUSG00000015289 | Lage3      | 66192     | red          |
| ENSMUSG00000026219 | Trip12     | 14897     | brown        |
| ENSMUSG00000050188 | Lsm10      | 116748    | turquoise    |
| ENSMUSG00000061118 | NA         | NA        | green        |
| ENSMUSG00000068391 | Chrac1     | 93696     | green        |
| ENSMUSG00000068394 | Cep152     | 99100     | brown        |
| ENSMUSG00000096563 | NA         | NA        | yellow       |
| ENSMUSG00000068396 | NA         | NA        | black        |
| ENSMUSG00000068397 | NA         | NA        | red          |
| ENSMUSG00000089838 | NA         | NA        | brown        |
| ENSMUSG00000029763 | Exoc4      | 20336     | blue         |
| ENSMUSG00000105446 | NA         | NA        | turquoise    |
| ENSMUSG00000029765 | Plxna4     | 243743    | turquoise    |
| ENSMUSG00000105449 | NA         | NA        | yellow       |
| ENSMUSG00000019254 | Ppp1r12c   | 232807    | brown        |
| ENSMUSG00000029767 | Calu       | 12321     | midnightblue |
| ENSMUSG00000047423 | AI837181   | 107242    | blue         |

|                    |               |        |              |
|--------------------|---------------|--------|--------------|
| ENSMUSG00000029769 | Ccdc136       | 232664 | turquoise    |
| ENSMUSG00000082321 | NA            | NA     | yellow       |
| ENSMUSG00000036499 | Eea1          | 216238 | yellow       |
| ENSMUSG00000082322 | NA            | NA     | turquoise    |
| ENSMUSG00000092837 | Rpph1         | 85029  | turquoise    |
| ENSMUSG00000004591 | Pkn2          | 109333 | blue         |
| ENSMUSG00000032763 | Ilvbl         | 216136 | turquoise    |
| ENSMUSG00000015522 | Arnt          | 11863  | brown        |
| ENSMUSG00000082329 | NA            | NA     | yellow       |
| ENSMUSG00000022253 | Nadk2         | 68646  | yellow       |
| ENSMUSG00000060935 | Tmem263       | 103266 | blue         |
| ENSMUSG00000022255 | Mtdh          | 67154  | turquoise    |
| ENSMUSG00000050423 | Ppp1r3g       | 76487  | yellow       |
| ENSMUSG00000022257 | Laptm4b       | 114128 | yellow       |
| ENSMUSG00000060938 | Rpl26         | 19941  | black        |
| ENSMUSG00000000861 | Bcl11a        | 14025  | red          |
| ENSMUSG00000050428 | Fbxo46        | 243867 | yellow       |
| ENSMUSG00000047193 | Dync2h1       | 110350 | greenyellow  |
| ENSMUSG00000085875 | NA            | NA     | yellow       |
| ENSMUSG00000058126 | NA            | NA     | green        |
| ENSMUSG00000015290 | Ubl4a         | 27643  | black        |
| ENSMUSG00000015291 | Gdi1          | 14567  | turquoise    |
| ENSMUSG00000071632 | 2510002D24Rik | 72307  | turquoise    |
| ENSMUSG00000026223 | Itm2c         | 64294  | red          |
| ENSMUSG00000050192 | Eif5a2        | 208691 | yellow       |
| ENSMUSG00000036737 | Oxsr1         | 108737 | turquoise    |
| ENSMUSG00000050195 | Scd4          | 329065 | turquoise    |
| ENSMUSG00000043467 | Zbtb37        | 240869 | turquoise    |
| ENSMUSG00000026227 | 2810459M11Rik | 72792  | midnightblue |
| ENSMUSG00000026229 | Psmc1         | 70247  | red          |
| ENSMUSG00000050199 | Lgr4          | 107515 | purple       |
| ENSMUSG00000001052 | Sec24b        | 99683  | green        |
| ENSMUSG00000001054 | Rmnd5b        | 66089  | turquoise    |
| ENSMUSG00000001056 | Nhp2          | 52530  | red          |
| ENSMUSG00000089844 | A530032D15Rik | 381287 | turquoise    |
| ENSMUSG00000086061 | NA            | NA     | pink         |
| ENSMUSG00000079334 | Nat6          | 56441  | turquoise    |
| ENSMUSG00000089847 | NA            | NA     | turquoise    |
| ENSMUSG00000105452 | NA            | NA     | greenyellow  |
| ENSMUSG00000096578 | NA            | NA     | lightcyan    |
| ENSMUSG00000029772 | Ahcyl2        | 74340  | turquoise    |
| ENSMUSG00000019261 | Map1s         | 270058 | turquoise    |
| ENSMUSG00000029775 | Klhdc10       | 76788  | brown        |
| ENSMUSG00000029776 | Hibadh        | 58875  | turquoise    |
| ENSMUSG00000075600 | Zc3h3         | 223642 | blue         |
| ENSMUSG00000029777 | Gars          | 353172 | red          |
| ENSMUSG00000029778 | Adcyap1r1     | 11517  | purple       |
| ENSMUSG00000082330 | NA            | NA     | turquoise    |
| ENSMUSG00000082336 | NA            | NA     | turquoise    |
| ENSMUSG00000075609 | NA            | NA     | black        |
| ENSMUSG00000022261 | Sdc2          | 15529  | green        |
| ENSMUSG00000043702 | NA            | NA     | red          |
| ENSMUSG00000022263 | Trio          | 223435 | turquoise    |
| ENSMUSG00000015536 | Mocs2         | 17434  | blue         |

|                    |               |        |             |
|--------------------|---------------|--------|-------------|
| ENSMUSG00000032777 | Gtf3c1        | 233863 | blue        |
| ENSMUSG00000022265 | Ank           | 11732  | greenyellow |
| ENSMUSG00000000876 | NA            | NA     | blue        |
| ENSMUSG00000085882 | NA            | NA     | turquoise   |
| ENSMUSG00000096810 | NA            | NA     | turquoise   |
| ENSMUSG00000101493 | NA            | NA     | turquoise   |
| ENSMUSG00000058135 | Gstm1         | 14862  | red         |
| ENSMUSG00000075376 | Rc3h2         | 319817 | turquoise   |
| ENSMUSG00000101496 | NA            | NA     | black       |
| ENSMUSG00000086308 | NA            | NA     | turquoise   |
| ENSMUSG00000008575 | Nfib          | 18028  | brown       |
| ENSMUSG00000071640 | NA            | NA     | yellow      |
| ENSMUSG00000053985 | NA            | NA     | turquoise   |
| ENSMUSG00000054400 | Cklf          | 75458  | brown       |
| ENSMUSG00000036745 | Ttll7         | 70892  | pink        |
| ENSMUSG00000019505 | NA            | NA     | green       |
| ENSMUSG00000061130 | Ppm1b         | 19043  | turquoise   |
| ENSMUSG00000026234 | Ncl           | 17975  | black       |
| ENSMUSG00000036748 | Cuedc2        | 67116  | green       |
| ENSMUSG00000071644 | Eef1g         | 67160  | black       |
| ENSMUSG00000026235 | Epha4         | 13838  | brown       |
| ENSMUSG00000071645 | Tut1          | 70044  | blue        |
| ENSMUSG00000064917 | NA            | NA     | turquoise   |
| ENSMUSG00000071646 | Mta2          | 23942  | green       |
| ENSMUSG00000054405 | Dnajc8        | 68598  | blue        |
| ENSMUSG00000071647 | Eml3          | 225898 | brown       |
| ENSMUSG00000026238 | Ptma          | 19231  | red         |
| ENSMUSG00000026239 | Pde6d         | 18582  | brown       |
| ENSMUSG00000071649 | B3gat3        | 72727  | brown       |
| ENSMUSG00000004843 | Chmp2b        | 68942  | brown       |
| ENSMUSG00000054408 | Spcs3         | 76687  | brown       |
| ENSMUSG00000061136 | Prpf40a       | 56194  | red         |
| ENSMUSG00000022500 | Litaf         | 56722  | green       |
| ENSMUSG00000004846 | Plod3         | 26433  | turquoise   |
| ENSMUSG00000001062 | Vps9d1        | 72325  | blue        |
| ENSMUSG00000022503 | Nubp1         | 26425  | red         |
| ENSMUSG00000004849 | Ap1s1         | 11769  | blue        |
| ENSMUSG00000022505 | Emp2          | 13731  | blue        |
| ENSMUSG00000001065 | Zfp276        | 57247  | blue        |
| ENSMUSG00000022507 | 1810013L24Rik | 69053  | yellow      |
| ENSMUSG00000089855 | NA            | NA     | turquoise   |
| ENSMUSG00000105461 | NA            | NA     | turquoise   |
| ENSMUSG00000089857 | NA            | NA     | brown       |
| ENSMUSG00000029780 | Nt5c3         | 107569 | blue        |
| ENSMUSG00000029781 | Fkbp9         | 27055  | turquoise   |
| ENSMUSG00000029782 | Tmem209       | 72649  | turquoise   |
| ENSMUSG00000097006 | 9530082P21Rik | 638247 | brown       |
| ENSMUSG00000029787 | Avl9          | 78937  | turquoise   |
| ENSMUSG00000092853 | NA            | NA     | turquoise   |
| ENSMUSG00000047446 | Arl4a         | 11861  | yellow      |
| ENSMUSG00000082345 | NA            | NA     | turquoise   |
| ENSMUSG00000054178 | NA            | NA     | turquoise   |
| ENSMUSG00000060950 | Trmt61a       | 328162 | turquoise   |
| ENSMUSG00000032782 | Cntrob        | 216846 | magenta     |

|                    |               |           |              |
|--------------------|---------------|-----------|--------------|
| ENSMUSG00000032783 | Troap         | 78733     | magenta      |
| ENSMUSG00000015542 | Nat9          | 66176     | green        |
| ENSMUSG00000022272 | Myo10         | 17909     | turquoise    |
| ENSMUSG00000032786 | Alas1         | 11655     | turquoise    |
| ENSMUSG00000032788 | Pdxk          | 216134    | turquoise    |
| ENSMUSG00000005034 | Prkacb        | 18749     | green        |
| ENSMUSG00000043716 | Rpl7          | 19989     | black        |
| ENSMUSG00000000881 | Dlg3          | 53310     | turquoise    |
| ENSMUSG00000000884 | Gnb1l         | 13972     | blue         |
| ENSMUSG00000033208 | S100b         | 20203     | purple       |
| ENSMUSG00000033209 | Ttc28         | 209683    | brown        |
| ENSMUSG00000001300 | Efnb2         | 13642     | brown        |
| ENSMUSG00000001305 | Rrp15         | 67223     | turquoise    |
| ENSMUSG00000085891 | Gm14634       | 552913    | yellow       |
| ENSMUSG00000105703 | NA            | NA        | cyan         |
| ENSMUSG00000036751 | Cox6b1        | 110323    | midnightblue |
| ENSMUSG00000086316 | NA            | NA        | blue         |
| ENSMUSG00000036752 | Tubb4b        | 227613    | yellow       |
| ENSMUSG00000026240 | Cops7b        | 26895     | green        |
| ENSMUSG00000071650 | Ganab         | 14376     | green        |
| ENSMUSG00000043483 | NA            | NA        | blue         |
| ENSMUSG00000071652 | Ints5         | 109077    | green        |
| ENSMUSG00000043484 | NA            | NA        | turquoise    |
| ENSMUSG00000071653 | 1810009A15Rik | 66276     | turquoise    |
| ENSMUSG00000071654 | Uqcc3         | 107197    | brown        |
| ENSMUSG00000026245 | Farsb         | 23874     | salmon       |
| ENSMUSG00000071655 | Ubxn1         | 225896    | midnightblue |
| ENSMUSG00000019518 | NA            | NA        | pink         |
| ENSMUSG00000054414 | Slc30a7       | 66500     | turquoise    |
| ENSMUSG00000071657 | Bscl2         | 14705     | blue         |
| ENSMUSG00000026248 | Mrpl44        | 69163     | pink         |
| ENSMUSG00000026249 | Serpine2      | 20720     | red          |
| ENSMUSG00000071659 | Hnrnpul2      | 68693     | brown        |
| ENSMUSG00000022515 | Anks3         | 72615     | turquoise    |
| ENSMUSG00000011589 | Fsd1          | 240121    | turquoise    |
| ENSMUSG00000022516 | Nudt16l1      | 66911     | green        |
| ENSMUSG00000022517 | Mgrn1         | 17237     | turquoise    |
| ENSMUSG00000089862 | Umad1         | 100036521 | blue         |
| ENSMUSG00000022519 | Srl           | 106393    | brown        |
| ENSMUSG00000096592 | NA            | NA        | blue         |
| ENSMUSG00000029790 | Cep41         | 83922     | lightcyan    |
| ENSMUSG00000057963 | Itpk1         | 217837    | turquoise    |
| ENSMUSG00000029798 | Herc6         | 67138     | turquoise    |
| ENSMUSG00000047454 | Gphn          | 268566    | turquoise    |
| ENSMUSG00000047459 | Dynlrb1       | 67068     | midnightblue |
| ENSMUSG00000008822 | Acyp1         | 66204     | blue         |
| ENSMUSG00000022280 | Rnf19a        | 30945     | brown        |
| ENSMUSG00000060961 | Slc4a4        | 54403     | purple       |
| ENSMUSG00000022283 | Pabpc1        | 18458     | black        |
| ENSMUSG00000022285 | Ywhaz         | 22631     | midnightblue |
| ENSMUSG00000033214 | Slitrk5       | 75409     | turquoise    |
| ENSMUSG00000033216 | Eefsec        | 65967     | blue         |
| ENSMUSG00000001313 | NA            | NA        | brown        |
| ENSMUSG00000068663 | Clec16a       | 74374     | brown        |

|                    |              |           |           |
|--------------------|--------------|-----------|-----------|
| ENSMUSG00000075391 | NA           | NA        | brown     |
| ENSMUSG00000105710 | NA           | NA        | blue      |
| ENSMUSG00000086324 | NA           | NA        | turquoise |
| ENSMUSG00000086328 | NA           | NA        | blue      |
| ENSMUSG00000071660 | Ttc9c        | 70387     | blue      |
| ENSMUSG00000071662 | Polr2g       | 67710     | green     |
| ENSMUSG00000036766 | Dner         | 227325    | turquoise |
| ENSMUSG00000009013 | Dynll1       | 56455     | turquoise |
| ENSMUSG00000026254 | Eif4e2       | 26987     | black     |
| ENSMUSG00000036768 | Kif15        | 209737    | magenta   |
| ENSMUSG00000026255 | Efhd1        | 98363     | yellow    |
| ENSMUSG00000043496 | Tril         | 66873     | purple    |
| ENSMUSG00000019528 | Gyg          | 27357     | turquoise |
| ENSMUSG00000036769 | Wdr44        | 72404     | turquoise |
| ENSMUSG00000054426 | A930005H10Ri | 68161     | turquoise |
| ENSMUSG00000026259 | Ngef         | 53972     | purple    |
| ENSMUSG00000071669 | Snx29        | 74478     | yellow    |
| ENSMUSG00000054428 | Atpif1       | 11983     | black     |
| ENSMUSG00000004865 | Srpk1        | 20815     | green     |
| ENSMUSG00000022521 | Crebbp       | 12914     | brown     |
| ENSMUSG00000001082 | Mfsd10       | 68294     | blue      |
| ENSMUSG00000022523 | NA           | NA        | turquoise |
| ENSMUSG00000022528 | Hes1         | 15205     | turquoise |
| ENSMUSG00000089872 | Rps6kc1      | 320119    | yellow    |
| ENSMUSG00000022529 | Zfp263       | 74120     | blue      |
| ENSMUSG00000001089 | Luzp1        | 269593    | turquoise |
| ENSMUSG00000089875 | Etohd2       | 13996     | turquoise |
| ENSMUSG00000097023 | AI854517     | 101694    | turquoise |
| ENSMUSG00000097025 | NA           | NA        | cyan      |
| ENSMUSG00000019295 | Tmem129      | 68366     | yellow    |
| ENSMUSG00000019297 | Nop9         | 67842     | green     |
| ENSMUSG00000082362 | NA           | NA        | turquoise |
| ENSMUSG00000092876 | NA           | NA        | turquoise |
| ENSMUSG00000065126 | Snord104     | 100216537 | blue      |
| ENSMUSG00000054199 | Gon4l        | 76022     | cyan      |
| ENSMUSG00000082368 | NA           | NA        | yellow    |
| ENSMUSG00000022292 | Rrm2b        | 382985    | turquoise |
| ENSMUSG00000043733 | Ptpn11       | 19247     | blue      |
| ENSMUSG00000022295 | Atp6v1c1     | 66335     | green     |
| ENSMUSG00000005054 | Cstb         | 13014     | yellow    |
| ENSMUSG00000033228 | Scaf11       | 72193     | blue      |
| ENSMUSG00000011831 | Evi5         | 14020     | turquoise |
| ENSMUSG00000011832 | Evi5l        | 213027    | turquoise |
| ENSMUSG00000001323 | Srr          | 27364     | green     |
| ENSMUSG00000011837 | Snpc2        | 102209    | green     |
| ENSMUSG00000096842 | NA           | NA        | tan       |
| ENSMUSG00000096847 | Tmem151b     | 210573    | brown     |
| ENSMUSG00000105726 | NA           | NA        | turquoise |
| ENSMUSG00000026260 | NA           | NA        | turquoise |
| ENSMUSG00000036775 | Decr2        | 26378     | yellow    |
| ENSMUSG00000036777 | Anln         | 68743     | magenta   |
| ENSMUSG00000036779 | Papd5        | 214627    | blue      |
| ENSMUSG00000082604 | NA           | NA        | turquoise |
| ENSMUSG00000082605 | NA           | NA        | blue      |

|                    |               |        |           |
|--------------------|---------------|--------|-----------|
| ENSMUSG00000026269 | Rnpepl1       | 108657 | pink      |
| ENSMUSG00000061167 | NA            | NA     | red       |
| ENSMUSG00000015804 | Med28         | 66999  | green     |
| ENSMUSG00000022533 | Atp13a3       | 224088 | brown     |
| ENSMUSG00000015806 | Qdpr          | 110391 | brown     |
| ENSMUSG00000022536 | Glyr1         | 74022  | red       |
| ENSMUSG00000050705 | 2310061104Rik | 69662  | brown     |
| ENSMUSG00000022537 | NA            | NA     | yellow    |
| ENSMUSG00000022538 | NA            | NA     | black     |
| ENSMUSG00000001098 | Kctd10        | 330171 | lightcyan |
| ENSMUSG00000089883 | NA            | NA     | pink      |
| ENSMUSG00000050708 | Ftl1          | 14325  | green     |
| ENSMUSG00000089889 | 0610040B10Rik | 67672  | yellow    |
| ENSMUSG00000057982 | Zfp809        | 235047 | turquoise |
| ENSMUSG00000047473 | NA            | NA     | turquoise |
| ENSMUSG00000058402 | Zfp420        | 233058 | turquoise |
| ENSMUSG00000068917 | Clk2          | 12748  | blue      |
| ENSMUSG00000092889 | NA            | NA     | turquoise |
| ENSMUSG00000058407 | Txndc9        | 98258  | green     |
| ENSMUSG00000060981 | Hist1h4h      | 69386  | blue      |
| ENSMUSG00000026500 | Cox20         | 66359  | pink      |
| ENSMUSG00000015575 | Atp6v0e       | 11974  | yellow    |
| ENSMUSG00000050471 | Fam118b       | 109229 | blue      |
| ENSMUSG00000026502 | NA            | NA     | turquoise |
| ENSMUSG00000026504 | Sdccag8       | 76816  | green     |
| ENSMUSG00000033233 | Trim45        | 229644 | green     |
| ENSMUSG00000060989 | NA            | NA     | red       |
| ENSMUSG00000033237 | Arid2         | 77044  | blue      |
| ENSMUSG00000026509 | Capn2         | 12334  | turquoise |
| ENSMUSG00000005069 | Pex5          | 19305  | green     |
| ENSMUSG00000079614 | Seh1l         | 72124  | red       |
| ENSMUSG00000105733 | NA            | NA     | pink      |
| ENSMUSG00000036781 | Rps27l        | 67941  | black     |
| ENSMUSG00000036782 | Klhl13        | 67455  | green     |
| ENSMUSG00000047710 | Champ1        | 101994 | brown     |
| ENSMUSG00000026270 | Capn10        | 23830  | turquoise |
| ENSMUSG00000009030 | Pdcl          | 67466  | green     |
| ENSMUSG00000026273 | NA            | NA     | turquoise |
| ENSMUSG00000047714 | Ppp1r2        | 66849  | turquoise |
| ENSMUSG00000026274 | Pask          | 269224 | salmon    |
| ENSMUSG00000026275 | NA            | NA     | green     |
| ENSMUSG00000009035 | Tmem184b      | 223693 | turquoise |
| ENSMUSG00000026276 | 1-Sep         | 18000  | blue      |
| ENSMUSG00000037204 | Atg101        | 68118  | blue      |
| ENSMUSG00000026277 | NA            | NA     | turquoise |
| ENSMUSG00000004880 | Lbr           | 98386  | red       |
| ENSMUSG00000037206 | Islr          | 26968  | turquoise |
| ENSMUSG00000026279 | Thap4         | 67026  | turquoise |
| ENSMUSG00000047719 | Ubiad1        | 71707  | grey60    |
| ENSMUSG00000061175 | Fnip2         | 329679 | brown     |
| ENSMUSG00000022540 | Rogdi         | 66049  | brown     |
| ENSMUSG00000022544 | Eef2kmt       | 70511  | blue      |
| ENSMUSG00000022545 | NA            | NA     | turquoise |
| ENSMUSG00000022546 | Gpt           | 76282  | yellow    |

|                    |               |           |             |
|--------------------|---------------|-----------|-------------|
| ENSMUSG00000050714 | Zbtb26        | 320633    | turquoise   |
| ENSMUSG00000040204 | 2810417H13Rik | 68026     | magenta     |
| ENSMUSG00000097040 | 2610316D01Rik | 72511     | red         |
| ENSMUSG00000040209 | Zfp704        | 170753    | blue        |
| ENSMUSG00000057990 | NA            | NA        | turquoise   |
| ENSMUSG00000097042 | NA            | NA        | brown       |
| ENSMUSG00000068921 | Dap3          | 65111     | yellow      |
| ENSMUSG00000068922 | Msto1         | 229524    | blue        |
| ENSMUSG00000097048 | 1600020E01Rik | 72012     | turquoise   |
| ENSMUSG00000068923 | Syt11         | 229521    | yellow      |
| ENSMUSG00000082382 | NA            | NA        | turquoise   |
| ENSMUSG00000093314 | Mir5136       | 100628605 | lightcyan   |
| ENSMUSG00000065147 | Snora31       | 100303751 | pink        |
| ENSMUSG00000060992 | Copz1         | 56447     | yellow      |
| ENSMUSG00000008855 | Hdac5         | 15184     | brown       |
| ENSMUSG00000026510 | Trp53bp2      | 209456    | purple      |
| ENSMUSG00000026511 | Srp9          | 27058     | blue        |
| ENSMUSG00000008859 | Rala          | 56044     | green       |
| ENSMUSG00000061410 | Zcchc14       | 142682    | turquoise   |
| ENSMUSG00000026516 | Nvl           | 67459     | blue        |
| ENSMUSG00000005078 | Jkamp         | 104771    | turquoise   |
| ENSMUSG00000086350 | NA            | NA        | turquoise   |
| ENSMUSG00000036790 | Slitrk2       | 245450    | purple      |
| ENSMUSG00000036792 | Mbd5          | 109241    | turquoise   |
| ENSMUSG00000026280 | NA            | NA        | blue        |
| ENSMUSG00000047721 | NA            | NA        | black       |
| ENSMUSG00000026281 | Dtymk         | 21915     | black       |
| ENSMUSG00000105748 | NA            | NA        | pink        |
| ENSMUSG00000026283 | Ing5          | 66262     | blue        |
| ENSMUSG00000037210 | Fam193a       | 231128    | turquoise   |
| ENSMUSG00000054452 | Aes           | 14797     | brown       |
| ENSMUSG00000019558 | Slc6a8        | 102857    | brown       |
| ENSMUSG00000037214 | NA            | NA        | blue        |
| ENSMUSG00000054455 | Vapb          | 56491     | blue        |
| ENSMUSG00000026289 | Atg16l1       | 77040     | pink        |
| ENSMUSG00000082625 | NA            | NA        | blue        |
| ENSMUSG00000004892 | Bcan          | 12032     | red         |
| ENSMUSG00000037216 | Lipt1         | 623661    | brown       |
| ENSMUSG00000082626 | NA            | NA        | turquoise   |
| ENSMUSG00000037217 | Syn1          | 20964     | turquoise   |
| ENSMUSG00000022550 | Adck5         | 268822    | turquoise   |
| ENSMUSG00000004895 | Prcc          | 94315     | turquoise   |
| ENSMUSG00000022551 | Cyc1          | 66445     | turquoise   |
| ENSMUSG00000004896 | Rrad1         | 229503    | turquoise   |
| ENSMUSG00000022552 | Sharpin       | 106025    | green       |
| ENSMUSG00000004897 | Hdgf          | 15191     | red         |
| ENSMUSG00000022553 | Maf1          | 68877     | green       |
| ENSMUSG00000005312 | Ubqln1        | 56085     | green       |
| ENSMUSG00000050721 | NA            | NA        | turquoise   |
| ENSMUSG00000022554 | Hgh1          | 59053     | turquoise   |
| ENSMUSG00000022555 | Dgat1         | 13350     | greenyellow |
| ENSMUSG00000022556 | Hsf1          | 15499     | turquoise   |
| ENSMUSG00000022557 | Bop1          | 12181     | black       |
| ENSMUSG00000022558 | Mroh1         | 223658    | turquoise   |

|                     |               |        |              |
|---------------------|---------------|--------|--------------|
| ENSMUSG00000040213  | Ccbl2         | 229905 | brown        |
| ENSMUSG00000022559  | Fbxl6         | 30840  | turquoise    |
| ENSMUSG00000097051  | NA            | NA     | yellow       |
| ENSMUSG00000097057  | NA            | NA     | cyan         |
| ENSMUSG00000097059  | NA            | NA     | yellow       |
| ENSMUSG00000082394  | NA            | NA     | turquoise    |
| ENSMUSG00000101784  | NA            | NA     | turquoise    |
| ENSMUSG00000026520  | Pycr2         | 69051  | blue         |
| ENSMUSG00000082399  | NA            | NA     | turquoise    |
| ENSMUSG00000050490  | NA            | NA     | blue         |
| ENSMUSG00000015597  | Zfp318        | 57908  | turquoise    |
| ENSMUSG00000033253  | Szt2          | 230676 | turquoise    |
| ENSMUSG00000026526  | NA            | NA     | green        |
| ENSMUSG00000026527  | Rgs7          | 24012  | yellow       |
| ENSMUSG00000005087  | Cd44          | 12505  | turquoise    |
| ENSMUSG00000033257  | Ttll4         | 67534  | red          |
| ENSMUSG00000005089  | Slc1a2        | 20511  | red          |
| ENSMUSG00000016018  | Skiv2l2       | 72198  | blue         |
| ENSMUSG000000058192 | Zfp846        | 244721 | turquoise    |
| ENSMUSG000000069125 | NA            | NA     | pink         |
| ENSMUSG000000086368 | NA            | NA     | brown        |
| ENSMUSG00000047731  | Wbp1l         | 226178 | turquoise    |
| ENSMUSG000000037221 | Mospd3        | 68929  | blue         |
| ENSMUSG000000082632 | NA            | NA     | turquoise    |
| ENSMUSG000000054469 | Lclat1        | 225010 | blue         |
| ENSMUSG00000022560  | Slc52a2       | 52710  | yellow       |
| ENSMUSG00000022561  | Gpaa1         | 14731  | turquoise    |
| ENSMUSG00000022562  | Oplah         | 75475  | turquoise    |
| ENSMUSG000000050730 | Arhgap42      | 71544  | yellow       |
| ENSMUSG00000022564  | Grina         | 66168  | red          |
| ENSMUSG00000022565  | Plec          | 18810  | turquoise    |
| ENSMUSG00000015837  | Sqstm1        | 18412  | greenyellow  |
| ENSMUSG00000040220  | Gas8          | 104346 | turquoise    |
| ENSMUSG00000015839  | Nfe2l2        | 18024  | turquoise    |
| ENSMUSG00000022568  | Scrib         | 105782 | blue         |
| ENSMUSG00000040225  | Prrc2c        | 226562 | green        |
| ENSMUSG00000097061  | 9330151L19Rik | 414085 | turquoise    |
| ENSMUSG00000097063  | Pantr2        | 66620  | blue         |
| ENSMUSG00000097067  | NA            | NA     | yellow       |
| ENSMUSG00000101795  | NA            | NA     | black        |
| ENSMUSG00000019802  | Sec63         | 140740 | blue         |
| ENSMUSG00000019803  | Nr2e1         | 21907  | midnightblue |
| ENSMUSG00000043773  | 1700048O20Rik | 69430  | blue         |
| ENSMUSG00000019804  | Snx3          | 54198  | turquoise    |
| ENSMUSG00000019806  | Aig1          | 66253  | greenyellow  |
| ENSMUSG00000019809  | Pex3          | 56535  | turquoise    |
| ENSMUSG00000054708  | Ankrd24       | 70615  | turquoise    |
| ENSMUSG000000061436 | Hipk2         | 15258  | brown        |
| ENSMUSG00000016028  | Celsr1        | 12614  | yellow       |
| ENSMUSG00000022800  | Fytd1         | 69823  | yellow       |
| ENSMUSG00000022801  | Lrch3         | 70144  | turquoise    |
| ENSMUSG00000022802  | Lmln          | 239833 | blue         |
| ENSMUSG00000011877  | Git1          | 216963 | turquoise    |
| ENSMUSG00000001366  | Fbxo9         | 71538  | blue         |



|                    |               |        |             |
|--------------------|---------------|--------|-------------|
| ENSMUSG00000022807 | Osbpl11       | 106326 | pink        |
| ENSMUSG00000022808 | Snx4          | 69150  | green       |
| ENSMUSG00000079641 | NA            | NA     | black       |
| ENSMUSG00000086370 | Ftx           | 78878  | turquoise   |
| ENSMUSG00000096887 | NA            | NA     | turquoise   |
| ENSMUSG00000069135 | Fgfr1op       | 75296  | salmon      |
| ENSMUSG00000069136 | NA            | NA     | turquoise   |
| ENSMUSG00000097309 | NA            | NA     | yellow      |
| ENSMUSG00000019577 | Pdk4          | 27273  | turquoise   |
| ENSMUSG00000019578 | NA            | NA     | turquoise   |
| ENSMUSG00000019579 | NA            | NA     | brown       |
| ENSMUSG00000037234 | Hook3         | 320191 | turquoise   |
| ENSMUSG00000037235 | Mxd4          | 17122  | turquoise   |
| ENSMUSG00000054477 | Kcnn2         | 140492 | turquoise   |
| ENSMUSG00000037236 | NA            | NA     | black       |
| ENSMUSG00000065406 | Mirlet7i      | 387251 | turquoise   |
| ENSMUSG00000082647 | NA            | NA     | turquoise   |
| ENSMUSG00000022570 | Tsta3         | 22122  | turquoise   |
| ENSMUSG00000037239 | Spred3        | 101809 | yellow      |
| ENSMUSG00000022571 | Pycl          | 66194  | brown       |
| ENSMUSG00000022574 | Naprt         | 223646 | turquoise   |
| ENSMUSG00000015846 | Rxra          | 20181  | turquoise   |
| ENSMUSG00000033502 | Cdc14a        | 229776 | turquoise   |
| ENSMUSG00000005338 | Cadm3         | 94332  | turquoise   |
| ENSMUSG00000040234 | Tm7sf3        | 67623  | yellow      |
| ENSMUSG00000040236 | NA            | NA     | turquoise   |
| ENSMUSG00000097073 | 9430037G07Rik | 320692 | turquoise   |
| ENSMUSG00000058440 | Nrf1          | 18181  | blue        |
| ENSMUSG00000058443 | NA            | NA     | black       |
| ENSMUSG00000058444 | Map2k5        | 23938  | turquoise   |
| ENSMUSG00000019810 | Fuca2         | 66848  | turquoise   |
| ENSMUSG00000102220 | NA            | NA     | pink        |
| ENSMUSG00000019813 | Cep57l1       | 103268 | salmon      |
| ENSMUSG00000033272 | Slc35a4       | 67843  | turquoise   |
| ENSMUSG00000044201 | Cdc25c        | 12532  | magenta     |
| ENSMUSG00000019818 | Cd164         | 53599  | turquoise   |
| ENSMUSG00000054715 | Zscan22       | 232878 | turquoise   |
| ENSMUSG00000054716 | Zfp771        | 244216 | turquoise   |
| ENSMUSG00000033276 | Stk36         | 269209 | turquoise   |
| ENSMUSG00000054717 | Hmgb2         | 97165  | red         |
| ENSMUSG00000022811 | Zfp148        | 22661  | brown       |
| ENSMUSG00000011884 | Gltf          | 56356  | blue        |
| ENSMUSG00000022812 | Gsk3b         | 56637  | brown       |
| ENSMUSG00000022814 | Umps          | 22247  | red         |
| ENSMUSG00000022816 | Fstl1         | 14314  | turquoise   |
| ENSMUSG00000001376 | Vps50         | 73288  | green       |
| ENSMUSG00000079658 | Tceb1         | 67923  | green       |
| ENSMUSG00000105775 | NA            | NA     | greenyellow |
| ENSMUSG00000079659 | Tmem243       | 652925 | yellow      |
| ENSMUSG00000105779 | NA            | NA     | tan         |
| ENSMUSG00000009073 | Nf2           | 18016  | brown       |
| ENSMUSG00000037242 | Clic4         | 29876  | salmon      |
| ENSMUSG00000037243 | Zfp692        | 103836 | magenta     |
| ENSMUSG00000054484 | Tmem62        | 96957  | turquoise   |

|                    |               |        |              |
|--------------------|---------------|--------|--------------|
| ENSMUSG00000009076 | Zmat5         | 67178  | turquoise    |
| ENSMUSG00000009079 | Ewsr1         | 14030  | red          |
| ENSMUSG00000040242 | Fgfr1op2      | 67529  | green        |
| ENSMUSG00000012076 | Brms1l        | 52592  | blue         |
| ENSMUSG00000023004 | Tuba1b        | 22143  | red          |
| ENSMUSG00000023007 | Prpf40b       | 54614  | green        |
| ENSMUSG00000097080 | 1700086O06Rik | 73516  | turquoise    |
| ENSMUSG00000023008 | Fmnl3         | 22379  | turquoise    |
| ENSMUSG00000040249 | Lrp1          | 16971  | red          |
| ENSMUSG00000023009 | Nckap5l       | 380969 | turquoise    |
| ENSMUSG00000068962 | Zfp114        | 232966 | blue         |
| ENSMUSG00000068964 | NA            | NA     | yellow       |
| ENSMUSG00000068966 | Zbtb34        | 241311 | grey60       |
| ENSMUSG00000058454 | Dhcr7         | 13360  | turquoise    |
| ENSMUSG00000068969 | NA            | NA     | tan          |
| ENSMUSG00000008892 | Vdac3         | 22335  | blue         |
| ENSMUSG00000019820 | Utrn          | 22288  | turquoise    |
| ENSMUSG00000019822 | Smpd2         | 20598  | yellow       |
| ENSMUSG00000019823 | Mical1        | 171580 | turquoise    |
| ENSMUSG00000086629 | 2810403D21Rik | 69964  | brown        |
| ENSMUSG00000054720 | Lrrc8c        | 100604 | blue         |
| ENSMUSG00000043794 | NA            | NA     | yellow       |
| ENSMUSG00000026553 | Copa          | 12847  | blue         |
| ENSMUSG00000033282 | Rpgrip1l      | 244585 | blue         |
| ENSMUSG00000019826 | Zbtb24        | 268294 | turquoise    |
| ENSMUSG00000026554 | Dcaf8         | 98193  | midnightblue |
| ENSMUSG00000054723 | Vmac          | 106639 | turquoise    |
| ENSMUSG00000026556 | Vangl2        | 93840  | green        |
| ENSMUSG00000044211 | NA            | NA     | green        |
| ENSMUSG00000033285 | Wdr3          | 269470 | blue         |
| ENSMUSG00000026558 | NA            | NA     | salmon       |
| ENSMUSG00000033287 | Kctd17        | 72844  | turquoise    |
| ENSMUSG00000061455 | Stx17         | 67727  | brown        |
| ENSMUSG00000054728 | Phactr1       | 218194 | yellow       |
| ENSMUSG00000001380 | Hars          | 15115  | green        |
| ENSMUSG00000022820 | NA            | NA     | midnightblue |
| ENSMUSG00000061458 | Nol10         | 217431 | turquoise    |
| ENSMUSG00000022822 | Abcc5         | 27416  | turquoise    |
| ENSMUSG00000001383 | Zmat2         | 66492  | black        |
| ENSMUSG00000022828 | Gtf2e1        | 74197  | red          |
| ENSMUSG00000097320 | NA            | NA     | turquoise    |
| ENSMUSG00000097322 | NA            | NA     | turquoise    |
| ENSMUSG00000105787 | NA            | NA     | turquoise    |
| ENSMUSG00000037251 | Pomk          | 74653  | turquoise    |
| ENSMUSG00000106205 | NA            | NA     | yellow       |
| ENSMUSG00000037253 | Mex3c         | 240396 | turquoise    |
| ENSMUSG00000047766 | Lrrc49        | 102747 | turquoise    |
| ENSMUSG00000106208 | NA            | NA     | brown        |
| ENSMUSG00000047767 | Atg16l2       | 73683  | brown        |
| ENSMUSG00000082665 | NA            | NA     | turquoise    |
| ENSMUSG00000037257 | Aagab         | 66939  | blue         |
| ENSMUSG00000054499 | Dedd2         | 67379  | pink         |
| ENSMUSG00000037259 | Dzank1        | 241688 | turquoise    |
| ENSMUSG00000005354 | Txn2          | 56551  | yellow       |

|                     |               |        |           |
|---------------------|---------------|--------|-----------|
| ENSMUSG00000040250  | Asun          | 71177  | blue      |
| ENSMUSG00000023010  | Tmbim6        | 110213 | turquoise |
| ENSMUSG00000015869  | Prpsap1       | 67763  | blue      |
| ENSMUSG00000033526  | Ppip5k1       | 327655 | turquoise |
| ENSMUSG00000023015  | Racgap1       | 26934  | magenta   |
| ENSMUSG00000023018  | Smarcd1       | 83797  | black     |
| ENSMUSG00000023019  | Gpd1          | 14555  | cyan      |
| ENSMUSG00000001627  | NA            | NA     | blue      |
| ENSMUSG000000097099 | NA            | NA     | yellow    |
| ENSMUSG000000058463 | NA            | NA     | yellow    |
| ENSMUSG00000019831  | Wasf1         | 83767  | lightcyan |
| ENSMUSG00000026563  | Tada1         | 27878  | black     |
| ENSMUSG000000082900 | NA            | NA     | turquoise |
| ENSMUSG000000054733 | Msra          | 110265 | blue      |
| ENSMUSG00000019837  | Gtf3c6        | 67371  | green     |
| ENSMUSG00000026565  | Pou2f1        | 18986  | yellow    |
| ENSMUSG000000061461 | Smim20        | 66278  | turquoise |
| ENSMUSG00000026566  | Mpzl1         | 68481  | turquoise |
| ENSMUSG000000033294 | Noc4l         | 100608 | red       |
| ENSMUSG000000044221 | Grsf1         | 231413 | green     |
| ENSMUSG000000033295 | Ptpf          | 19268  | turquoise |
| ENSMUSG00000026568  | Mpc2          | 70456  | turquoise |
| ENSMUSG000000044224 | Dnajc21       | 78244  | turquoise |
| ENSMUSG000000054737 | NA            | NA     | turquoise |
| ENSMUSG000000082908 | NA            | NA     | blue      |
| ENSMUSG000000022837 | Iqcb1         | 320299 | blue      |
| ENSMUSG000000097330 | NA            | NA     | turquoise |
| ENSMUSG000000079677 | Fdx1l         | 68165  | green     |
| ENSMUSG000000097333 | Zfp87         | 170763 | turquoise |
| ENSMUSG00000009090  | Ap1b1         | 11764  | green     |
| ENSMUSG00000106212  | NA            | NA     | blue      |
| ENSMUSG000000097337 | NA            | NA     | yellow    |
| ENSMUSG000000037260 | Hgsnat        | 52120  | turquoise |
| ENSMUSG000000058700 | NA            | NA     | brown     |
| ENSMUSG000000037262 | Kin           | 16588  | blue      |
| ENSMUSG000000065431 | Mir186        | 387181 | turquoise |
| ENSMUSG000000058704 | Memo1         | 76890  | brown     |
| ENSMUSG000000047777 | Phf13         | 230936 | brown     |
| ENSMUSG000000082674 | NA            | NA     | red       |
| ENSMUSG000000058706 | 0610030E20Rik | 68364  | brown     |
| ENSMUSG000000082675 | NA            | NA     | black     |
| ENSMUSG000000037266 | Rsrp1         | 27981  | purple    |
| ENSMUSG000000082676 | NA            | NA     | brown     |
| ENSMUSG000000058709 | Egl2          | 112406 | blue      |
| ENSMUSG000000082678 | NA            | NA     | brown     |
| ENSMUSG000000093606 | B130034C11Rik | 414095 | turquoise |
| ENSMUSG000000005360 | Slc1a3        | 20512  | purple    |
| ENSMUSG000000033530 | Ttc7b         | 104718 | turquoise |
| ENSMUSG000000005362 | NA            | NA     | turquoise |
| ENSMUSG000000026803 | Ttf1          | 22130  | brown     |
| ENSMUSG000000040260 | Daam2         | 76441  | purple    |
| ENSMUSG000000023020 | Cox14         | 66379  | turquoise |
| ENSMUSG000000023021 | Cers5         | 71949  | brown     |
| ENSMUSG000000061702 | Tmem91        | 320208 | turquoise |

|                     |               |           |              |
|---------------------|---------------|-----------|--------------|
| ENSMUSG00000026806  | Ddx31         | 227674    | turquoise    |
| ENSMUSG00000023022  | Lima1         | 65970     | red          |
| ENSMUSG00000040263  | Klhdc4        | 234825    | blue         |
| ENSMUSG00000040265  | Dnm3          | 103967    | greenyellow  |
| ENSMUSG00000023025  | Larp4         | 207214    | blue         |
| ENSMUSG00000023026  | Dip2b         | 239667    | grey60       |
| ENSMUSG00000023027  | Atf1          | 11908     | salmon       |
| ENSMUSG00000040268  | Plekha1       | 101476    | turquoise    |
| ENSMUSG00000001630  | Stk38l        | 232533    | yellow       |
| ENSMUSG00000040269  | Mrps28        | 66230     | turquoise    |
| ENSMUSG00000001632  | Brpf1         | 78783     | blue         |
| ENSMUSG00000019841  | Rev3l         | 19714     | turquoise    |
| ENSMUSG00000019842  | Traf3ip2      | 103213    | turquoise    |
| ENSMUSG000000102252 | Snrpn         | 20646     | brown        |
| ENSMUSG00000076136  | NA            | NA        | yellow       |
| ENSMUSG00000019843  | Fyn           | 14360     | blue         |
| ENSMUSG00000026571  | Dcaf6         | 74106     | turquoise    |
| ENSMUSG00000076137  | NA            | NA        | pink         |
| ENSMUSG00000019845  | Tube1         | 71924     | cyan         |
| ENSMUSG00000026575  | Nme7          | 171567    | turquoise    |
| ENSMUSG00000044231  | Nhlrc1        | 105193    | turquoise    |
| ENSMUSG00000026576  | Atp1b1        | 11931     | lightcyan    |
| ENSMUSG00000037503  | Fam168b       | 214469    | blue         |
| ENSMUSG00000019849  | Prep          | 19072     | green        |
| ENSMUSG00000026577  | Blzf1         | 66352     | turquoise    |
| ENSMUSG00000061474  | Mrps36        | 66128     | brown        |
| ENSMUSG00000061477  | Rps7          | 20115     | black        |
| ENSMUSG00000037509  | Arhgef4       | 226970    | yellow       |
| ENSMUSG00000022841  | Ap2m1         | 11773     | midnightblue |
| ENSMUSG00000061479  | Snrpa         | 53607     | blue         |
| ENSMUSG00000022842  | Ece2          | 107522    | green        |
| ENSMUSG00000072407  | NA            | NA        | turquoise    |
| ENSMUSG00000022843  | Clcn2         | 12724     | turquoise    |
| ENSMUSG00000005609  | Ctr9          | 22083     | red          |
| ENSMUSG00000040506  | Ambra1        | 228361    | turquoise    |
| ENSMUSG00000069170  | Adgrv1        | 110789    | blue         |
| ENSMUSG00000069171  | Nr2f1         | 13865     | turquoise    |
| ENSMUSG00000097342  | NA            | NA        | turquoise    |
| ENSMUSG00000097343  | NA            | NA        | yellow       |
| ENSMUSG00000097345  | AA543186      | 100272219 | turquoise    |
| ENSMUSG00000097348  | Rmst          | 110333    | black        |
| ENSMUSG00000037270  | 4932438A13Rik | 229227    | turquoise    |
| ENSMUSG00000047786  | Lix1          | 66643     | yellow       |
| ENSMUSG00000047787  | Flrt1         | 396184    | blue         |
| ENSMUSG000000106229 | NA            | NA        | brown        |
| ENSMUSG00000047789  | Slc38a9       | 268706    | blue         |
| ENSMUSG00000015880  | Ncapg         | 54392     | magenta      |
| ENSMUSG00000037278  | Tmem97        | 69071     | turquoise    |
| ENSMUSG00000083101  | NA            | NA        | cyan         |
| ENSMUSG00000015882  | Lcorl         | 209707    | brown        |
| ENSMUSG00000005370  | Msh6          | 17688     | blue         |
| ENSMUSG00000026810  | Dpm2          | 13481     | midnightblue |
| ENSMUSG00000005371  | Fbxo11        | 225055    | turquoise    |
| ENSMUSG00000026811  | St6galnac6    | 50935     | turquoise    |

|                    |               |        |             |
|--------------------|---------------|--------|-------------|
| ENSMUSG00000026812 | Tsc1          | 64930  | turquoise   |
| ENSMUSG00000033540 | Idua          | 15932  | yellow      |
| ENSMUSG00000005373 | Mlxipl        | 58805  | turquoise   |
| ENSMUSG00000040270 | Bach2         | 12014  | turquoise   |
| ENSMUSG00000005374 | NA            | NA     | green       |
| ENSMUSG00000023030 | Slc11a2       | 18174  | turquoise   |
| ENSMUSG00000033543 | Gtf2a2        | 235459 | red         |
| ENSMUSG00000015889 | Lta4h         | 16993  | red         |
| ENSMUSG00000026816 | Gtf3c5        | 70239  | salmon      |
| ENSMUSG00000040272 | Accs          | 329470 | turquoise   |
| ENSMUSG00000023032 | Slc4a8        | 59033  | turquoise   |
| ENSMUSG00000033545 | Znrf1         | 170737 | turquoise   |
| ENSMUSG00000026817 | Ak1           | 11636  | greenyellow |
| ENSMUSG00000050786 | Ccdc126       | 57895  | yellow      |
| ENSMUSG00000023033 | Scn8a         | 20273  | blue        |
| ENSMUSG00000040274 | Cdk6          | 12571  | red         |
| ENSMUSG00000005378 | Wbscr22       | 66138  | green       |
| ENSMUSG00000026819 | Slc25a25      | 227731 | lightcyan   |
| ENSMUSG00000023036 | Pcdhgc4       | 93707  | turquoise   |
| ENSMUSG00000016308 | Ube2a         | 22209  | blue        |
| ENSMUSG00000001642 | Akr1b3        | 11677  | red         |
| ENSMUSG00000058486 | Wdr91         | 101240 | turquoise   |
| ENSMUSG00000019850 | Tnfaip3       | 21929  | brown       |
| ENSMUSG00000019854 | Reps1         | 19707  | yellow      |
| ENSMUSG00000019856 | Fam184a       | 75906  | yellow      |
| ENSMUSG00000026584 | Scyl3         | 240880 | blue        |
| ENSMUSG00000054752 | Fsd1l         | 319636 | green       |
| ENSMUSG00000019857 | Asf1a         | 66403  | black       |
| ENSMUSG00000026585 | Kifap3        | 16579  | turquoise   |
| ENSMUSG00000061482 | Hist1h4d      | 319156 | red         |
| ENSMUSG00000026586 | Prrx1         | 18933  | yellow      |
| ENSMUSG00000026587 | Astn1         | 11899  | greenyellow |
| ENSMUSG00000027001 | Dusp19        | 68082  | magenta     |
| ENSMUSG00000037514 | Pank2         | 74450  | brown       |
| ENSMUSG00000027002 | Nckap1        | 50884  | yellow      |
| ENSMUSG00000082925 | NA            | NA     | cyan        |
| ENSMUSG00000082926 | NA            | NA     | black       |
| ENSMUSG00000082927 | NA            | NA     | turquoise   |
| ENSMUSG00000037519 | Ppfia1        | 233977 | pink        |
| ENSMUSG00000027006 | Dnajc10       | 66861  | yellow      |
| ENSMUSG00000005610 | NA            | NA     | blue        |
| ENSMUSG00000027007 | Ssfa2         | 70599  | turquoise   |
| ENSMUSG00000022855 | Senp2         | 75826  | brown       |
| ENSMUSG00000005615 | Pcyt1a        | 13026  | turquoise   |
| ENSMUSG00000022858 | NA            | NA     | red         |
| ENSMUSG00000030002 | Dusp11        | 72102  | turquoise   |
| ENSMUSG00000097350 | 4732491K20Rik | 224523 | turquoise   |
| ENSMUSG00000030007 | Cct7          | 12468  | brown       |
| ENSMUSG00000030008 | Pradc1        | 73327  | turquoise   |
| ENSMUSG00000069188 | NA            | NA     | tan         |
| ENSMUSG00000082691 | NA            | NA     | blue        |
| ENSMUSG00000082693 | NA            | NA     | brown       |
| ENSMUSG00000106239 | NA            | NA     | red         |
| ENSMUSG00000037286 | Stag1         | 20842  | blue        |

|                    |              |           |           |
|--------------------|--------------|-----------|-----------|
| ENSMUSG00000037287 | Tbcel        | 272589    | yellow    |
| ENSMUSG00000058729 | Lin9         | 72568     | salmon    |
| ENSMUSG00000026820 | NA           | NA        | turquoise |
| ENSMUSG00000048218 | Amigo2       | 105827    | turquoise |
| ENSMUSG00000026821 | Ralgds       | 19730     | yellow    |
| ENSMUSG00000093629 | LOC102634300 | 102634300 | turquoise |
| ENSMUSG00000026827 | Gpd2         | 14571     | turquoise |
| ENSMUSG00000050796 | B3galt6      | 117592    | cyan      |
| ENSMUSG00000061724 | NA           | NA        | black     |
| ENSMUSG00000023044 | Csad         | 246277    | turquoise |
| ENSMUSG00000033557 | Fam20b       | 215015    | green     |
| ENSMUSG00000016319 | Slc25a5      | 11740     | pink      |
| ENSMUSG00000023048 | Prr13        | 66151     | turquoise |
| ENSMUSG00000040289 | Hey1         | 15213     | blue      |
| ENSMUSG00000058492 | NA           | NA        | yellow    |
| ENSMUSG00000102270 | NA           | NA        | blue      |
| ENSMUSG00000019861 | Gopc         | 94221     | turquoise |
| ENSMUSG00000019863 | Qrs1         | 76563     | turquoise |
| ENSMUSG00000019864 | Rtn4ip1      | 170728    | turquoise |
| ENSMUSG00000026594 | Ralgps2      | 78255     | green     |
| ENSMUSG00000044250 | Pced1b       | 239647    | turquoise |
| ENSMUSG00000019868 | Vta1         | 66201     | brown     |
| ENSMUSG00000026596 | Abi2         | 11352     | brown     |
| ENSMUSG00000027010 | NA           | NA        | brown     |
| ENSMUSG00000037523 | Mavs         | 228607    | turquoise |
| ENSMUSG00000044252 | Osbpl1a      | 64291     | yellow    |
| ENSMUSG00000027011 | NA           | NA        | blue      |
| ENSMUSG00000037525 | Bcdin3d      | 75284     | blue      |
| ENSMUSG00000072421 | NA           | NA        | red       |
| ENSMUSG00000027012 | Dync1i2      | 13427     | turquoise |
| ENSMUSG00000054766 | Set          | 56086     | black     |
| ENSMUSG00000037526 | Atg14        | 100504663 | turquoise |
| ENSMUSG00000082935 | NA           | NA        | black     |
| ENSMUSG00000027014 | Cwc22        | 80744     | brown     |
| ENSMUSG00000082938 | NA           | NA        | turquoise |
| ENSMUSG00000005621 | Zfp592       | 233410    | turquoise |
| ENSMUSG00000027018 | Hat1         | 107435    | black     |
| ENSMUSG00000022864 | NA           | NA        | grey60    |
| ENSMUSG00000040520 | Manea        | 242362    | turquoise |
| ENSMUSG00000040521 | Tsfm         | 66399     | green     |
| ENSMUSG00000005625 | Psm4         | 19185     | blue      |
| ENSMUSG00000022867 | Usp25        | 30940     | turquoise |
| ENSMUSG00000040524 | Zfp609       | 214812    | turquoise |
| ENSMUSG00000040528 | Milr1        | 380732    | turquoise |
| ENSMUSG00000097360 | NA           | NA        | green     |
| ENSMUSG00000030016 | Zfp638       | 18139     | brown     |
| ENSMUSG00000106240 | NA           | NA        | turquoise |
| ENSMUSG00000106246 | NA           | NA        | cyan      |
| ENSMUSG00000048222 | NA           | NA        | brown     |
| ENSMUSG00000037296 | Lsm1         | 67207     | green     |
| ENSMUSG00000083121 | NA           | NA        | turquoise |
| ENSMUSG00000065468 | Mir26b       | 387219    | turquoise |
| ENSMUSG00000026833 | Olfm1        | 56177     | blue      |
| ENSMUSG00000023050 | Map3k12      | 26404     | turquoise |

|                    |          |        |             |
|--------------------|----------|--------|-------------|
| ENSMUSG00000061731 | NA       | NA     | turquoise   |
| ENSMUSG00000023051 | Tarbp2   | 21357  | turquoise   |
| ENSMUSG00000026836 | Acvr1    | 11477  | brown       |
| ENSMUSG00000033565 | Rbfox2   | 93686  | turquoise   |
| ENSMUSG00000023055 | Calcoco1 | 67488  | yellow      |
| ENSMUSG00000051223 | Bzw1     | 66882  | blue        |
| ENSMUSG00000033569 | Adgrb3   | 210933 | yellow      |
| ENSMUSG00000040297 | Suco     | 226551 | brown       |
| ENSMUSG00000051224 | Tceanc   | 245695 | green       |
| ENSMUSG00000001663 | Gstt1    | 14871  | greenyellow |
| ENSMUSG00000001666 | Ddt      | 13202  | greenyellow |
| ENSMUSG00000079942 | NA       | NA     | turquoise   |
| ENSMUSG00000097601 | Zmiz1os1 | 414118 | cyan        |
| ENSMUSG00000019872 | Smpdl3a  | 57319  | purple      |
| ENSMUSG00000019873 | Reep3    | 28193  | brown       |
| ENSMUSG00000069439 | NA       | NA     | green       |
| ENSMUSG00000019874 | Fabp7    | 12140  | green       |
| ENSMUSG00000054770 | Kctd18   | 51960  | pink        |
| ENSMUSG00000037531 | NA       | NA     | green       |
| ENSMUSG00000019877 | Serinc1  | 56442  | yellow      |
| ENSMUSG00000037533 | Rapgef6  | 192786 | turquoise   |
| ENSMUSG00000019878 | Hsf2     | 15500  | brown       |
| ENSMUSG00000037536 | Fbxo34   | 78938  | turquoise   |
| ENSMUSG00000072432 | NA       | NA     | greenyellow |
| ENSMUSG00000040532 | Abhd11   | 68758  | turquoise   |
| ENSMUSG00000030020 | Prickle2 | 243548 | yellow      |
| ENSMUSG00000033808 | Tmem87a  | 211499 | yellow      |
| ENSMUSG00000033809 | Alg3     | 208624 | blue        |
| ENSMUSG00000040537 | Adam22   | 11496  | brown       |
| ENSMUSG00000030029 | Lrig1    | 16206  | turquoise   |
| ENSMUSG00000097375 | NA       | NA     | brown       |
| ENSMUSG00000106251 | NA       | NA     | lightcyan   |
| ENSMUSG00000001909 | Trmt1    | 212528 | blue        |
| ENSMUSG00000097379 | NA       | NA     | yellow      |
| ENSMUSG00000106258 | NA       | NA     | green       |
| ENSMUSG00000058745 | NA       | NA     | yellow      |
| ENSMUSG00000048232 | Fbxo10   | 269529 | yellow      |
| ENSMUSG00000058748 | NA       | NA     | yellow      |
| ENSMUSG00000026842 | Abl1     | 11350  | black       |
| ENSMUSG00000102525 | NA       | NA     | turquoise   |
| ENSMUSG00000026843 | Fubp3    | 320267 | turquoise   |
| ENSMUSG00000061740 | Cyp2d22  | 56448  | purple      |
| ENSMUSG00000044501 | Zfp758   | 224598 | blue        |
| ENSMUSG00000044502 | Bod1     | 69556  | blue        |
| ENSMUSG00000026848 | Tor1b    | 30934  | turquoise   |
| ENSMUSG00000051232 | Tmem199  | 195040 | blue        |
| ENSMUSG00000033577 | Myo6     | 17920  | yellow      |
| ENSMUSG00000026849 | Tor1a    | 30931  | brown       |
| ENSMUSG00000033578 | Tmem35   | 67564  | pink        |
| ENSMUSG00000044505 | Lingo4   | 320747 | brown       |
| ENSMUSG00000023066 | Rttm     | 246102 | brown       |
| ENSMUSG00000051234 | Rnf7     | 19823  | blue        |
| ENSMUSG00000023068 | Nus1     | 52014  | turquoise   |
| ENSMUSG00000051238 | Swsap1   | 66962  | blue        |

|                    |           |           |             |
|--------------------|-----------|-----------|-------------|
| ENSMUSG0000001674  | Ddx18     | 66942     | blue        |
| ENSMUSG00000012609 | Ttll5     | 320244    | turquoise   |
| ENSMUSG00000086682 | Gm16023   | 100502734 | turquoise   |
| ENSMUSG00000086688 | NA        | NA        | red         |
| ENSMUSG00000019883 | Echdc1    | 52665     | turquoise   |
| ENSMUSG00000027030 | Stk39     | 53416     | turquoise   |
| ENSMUSG00000102298 | NA        | NA        | greenyellow |
| ENSMUSG00000037544 | Dlgap5    | 218977    | magenta     |
| ENSMUSG00000082953 | NA        | NA        | yellow      |
| ENSMUSG00000055200 | Sertad3   | 170742    | blue        |
| ENSMUSG00000082955 | NA        | NA        | turquoise   |
| ENSMUSG00000055202 | Zfp811    | 240063    | turquoise   |
| ENSMUSG00000065715 | Snord7    | 100302731 | turquoise   |
| ENSMUSG00000055204 | Ankrd17   | 81702     | turquoise   |
| ENSMUSG00000090100 | Ttbk2     | 140810    | turquoise   |
| ENSMUSG00000090101 | Snhg9     | 73474     | yellow      |
| ENSMUSG00000022881 | Rfc4      | 106344    | red         |
| ENSMUSG00000022883 | Robo1     | 19876     | yellow      |
| ENSMUSG00000022884 | Eif4a2    | 13682     | yellow      |
| ENSMUSG00000022885 | St6gal1   | 20440     | turquoise   |
| ENSMUSG00000040540 | NA        | NA        | turquoise   |
| ENSMUSG00000033813 | Tcea1     | 21399     | black       |
| ENSMUSG00000022887 | Masp1     | 17174     | turquoise   |
| ENSMUSG00000022889 | Mrpl39    | 27393     | green       |
| ENSMUSG00000030032 | NA        | NA        | turquoise   |
| ENSMUSG00000033819 | Ppp1r16a  | 73062     | blue        |
| ENSMUSG00000030034 | Ino80b    | 70020     | blue        |
| ENSMUSG00000023307 | 4-Mar     | 69104     | brown       |
| ENSMUSG00000040548 | Tex2      | 21763     | turquoise   |
| ENSMUSG00000001910 | Nacc1     | 66830     | green       |
| ENSMUSG00000030035 | Wbp1      | 22377     | purple      |
| ENSMUSG00000001911 | Nfix      | 18032     | red         |
| ENSMUSG00000030036 | Mogs      | 57377     | turquoise   |
| ENSMUSG00000040549 | Ckap5     | 75786     | turquoise   |
| ENSMUSG00000097388 | NA        | NA        | pink        |
| ENSMUSG00000086920 | NA        | NA        | turquoise   |
| ENSMUSG00000048240 | Gng7      | 14708     | turquoise   |
| ENSMUSG00000086922 | NA        | NA        | turquoise   |
| ENSMUSG00000093651 | NA        | NA        | turquoise   |
| ENSMUSG00000058756 | Thra      | 21833     | blue        |
| ENSMUSG00000065485 | Mir219a-2 | 723904    | blue        |
| ENSMUSG00000086925 | NA        | NA        | brown       |
| ENSMUSG00000026851 | NA        | NA        | blue        |
| ENSMUSG00000048249 | Crebrf    | 77128     | turquoise   |
| ENSMUSG00000026853 | Crat      | 12908     | turquoise   |
| ENSMUSG00000026854 | Usp20     | 74270     | turquoise   |
| ENSMUSG00000061751 | Kalrn     | 545156    | yellow      |
| ENSMUSG00000009614 | Sardh     | 192166    | turquoise   |
| ENSMUSG00000026856 | Dolpp1    | 57170     | brown       |
| ENSMUSG00000016344 | Ppdpf     | 66496     | black       |
| ENSMUSG00000023072 | Cep89     | 72140     | turquoise   |
| ENSMUSG00000026857 | Ntmt1     | 66617     | green       |
| ENSMUSG00000033585 | Ndn       | 17984     | green       |
| ENSMUSG00000026858 | Fam73b    | 108958    | turquoise   |



|                    |               |           |              |
|--------------------|---------------|-----------|--------------|
| ENSMUSG00000023074 | Mospd1        | 70380     | yellow       |
| ENSMUSG00000061755 | Bod1l         | 665775    | turquoise    |
| ENSMUSG00000023075 | NA            | NA        | blue         |
| ENSMUSG00000033589 | Reep4         | 72549     | blue         |
| ENSMUSG00000061758 | Akr1b10       | 67861     | yellow       |
| ENSMUSG00000061759 | Armt1         | 73419     | turquoise    |
| ENSMUSG00000034006 | Pqlc1         | 66943     | yellow       |
| ENSMUSG00000023079 | Gtf2ird1      | 57080     | yellow       |
| ENSMUSG00000034007 | Scaper        | 244891    | yellow       |
| ENSMUSG00000001687 | Ubl3          | 24109     | turquoise    |
| ENSMUSG00000002102 | Psmc3         | 19182     | green        |
| ENSMUSG00000002103 | Acp2          | 11432     | turquoise    |
| ENSMUSG00000079962 | NA            | NA        | blue         |
| ENSMUSG00000002105 | Slc39a13      | 68427     | yellow       |
| ENSMUSG00000086691 | NA            | NA        | turquoise    |
| ENSMUSG00000002107 | Celf2         | 14007     | turquoise    |
| ENSMUSG00000002109 | Ddb2          | 107986    | turquoise    |
| ENSMUSG00000097622 | A330033J07Rik | 320614    | turquoise    |
| ENSMUSG00000019891 | Dcbld1        | 66686     | cyan         |
| ENSMUSG00000086697 | NA            | NA        | cyan         |
| ENSMUSG00000097626 | 4921504A21Rik | 70832     | turquoise    |
| ENSMUSG00000097628 | NA            | NA        | turquoise    |
| ENSMUSG00000054792 | Kihl18        | 270201    | turquoise    |
| ENSMUSG00000019897 | NA            | NA        | green        |
| ENSMUSG00000037552 | Plekhg2       | 101497    | turquoise    |
| ENSMUSG00000054793 | Cadm4         | 260299    | yellow       |
| ENSMUSG00000037553 | NA            | NA        | greenyellow  |
| ENSMUSG00000019899 | Lama2         | 16773     | purple       |
| ENSMUSG00000087119 | NA            | NA        | turquoise    |
| ENSMUSG00000044285 | NA            | NA        | green        |
| ENSMUSG00000022890 | Atp5j         | 11957     | midnightblue |
| ENSMUSG00000090110 | Cmc4          | 105886298 | blue         |
| ENSMUSG00000082969 | NA            | NA        | yellow       |
| ENSMUSG00000044288 | Cnr1          | 12801     | yellow       |
| ENSMUSG00000022892 | App           | 11820     | blue         |
| ENSMUSG00000090112 | Shprh         | 268281    | blue         |
| ENSMUSG00000022893 | Adamts1       | 11504     | turquoise    |
| ENSMUSG00000090114 | NA            | NA        | brown        |
| ENSMUSG00000090115 | NA            | NA        | turquoise    |
| ENSMUSG00000022895 | Ets2          | 23872     | turquoise    |
| ENSMUSG00000040550 | Otud6b        | 72201     | yellow       |
| ENSMUSG00000022897 | Dyrk1a        | 13548     | blue         |
| ENSMUSG00000005656 | Snx6          | 72183     | black        |
| ENSMUSG00000022898 | Dscr3         | 13185     | turquoise    |
| ENSMUSG00000022899 | Slc15a2       | 57738     | blue         |
| ENSMUSG00000090119 | NA            | NA        | turquoise    |
| ENSMUSG00000030042 | Pole4         | 66979     | turquoise    |
| ENSMUSG00000040557 | Wbscr27       | 79565     | turquoise    |
| ENSMUSG00000030045 | Mrpl19        | 56284     | green        |
| ENSMUSG00000097392 | D930016D06Rik | 100662    | turquoise    |
| ENSMUSG00000001924 | Uba1          | 22201     | green        |
| ENSMUSG00000106271 | NA            | NA        | turquoise    |
| ENSMUSG00000058761 | Rnf169        | 108937    | turquoise    |
| ENSMUSG00000093661 | Eif4e3        | 66892     | turquoise    |

|                    |               |           |           |
|--------------------|---------------|-----------|-----------|
| ENSMUSG00000086938 | 4930481A15Rik | 74931     | turquoise |
| ENSMUSG00000026860 | Sh3glb2       | 227700    | turquoise |
| ENSMUSG00000102543 | Pcdhgc5       | 93708     | yellow    |
| ENSMUSG00000093668 | Pou5f2        | 75507     | grey60    |
| ENSMUSG00000009621 | Vav2          | 22325     | red       |
| ENSMUSG00000026864 | Hspa5         | 14828     | brown     |
| ENSMUSG00000026867 | Gapvd1        | 66691     | turquoise |
| ENSMUSG00000033596 | Rfwd3         | 234736    | red       |
| ENSMUSG00000033597 | Caskin1       | 268932    | blue      |
| ENSMUSG00000026869 | NA            | NA        | black     |
| ENSMUSG00000051255 | NA            | NA        | blue      |
| ENSMUSG00000023087 | Noct          | 12457     | blue      |
| ENSMUSG00000023088 | Abcc1         | 17250     | brown     |
| ENSMUSG00000044528 | NA            | NA        | turquoise |
| ENSMUSG00000051256 | Jagn1         | 67767     | yellow    |
| ENSMUSG00000023089 | NA            | NA        | brown     |
| ENSMUSG00000087120 | NA            | NA        | turquoise |
| ENSMUSG00000097633 | Gm16617       | 100502764 | turquoise |
| ENSMUSG00000009394 | Syn2          | 20965     | turquoise |
| ENSMUSG00000106517 | NA            | NA        | turquoise |
| ENSMUSG00000037563 | Rps16         | 20055     | black     |
| ENSMUSG00000072460 | NA            | NA        | cyan      |
| ENSMUSG00000065734 | Snord49a      | 100217455 | yellow    |
| ENSMUSG00000093904 | Tomm20        | 67952     | brown     |
| ENSMUSG00000082978 | NA            | NA        | black     |
| ENSMUSG00000065738 | NA            | NA        | yellow    |
| ENSMUSG00000090122 | Kcne1l        | 66240     | green     |
| ENSMUSG00000055228 | NA            | NA        | yellow    |
| ENSMUSG00000040560 | Wdr7          | 104082    | turquoise |
| ENSMUSG00000040563 | Plppr2        | 235044    | green     |
| ENSMUSG00000005667 | Mthfd2        | 17768     | magenta   |
| ENSMUSG00000030051 | Aplf          | 72103     | turquoise |
| ENSMUSG00000040565 | Btaf1         | 107182    | blue      |
| ENSMUSG00000030055 | Rab43         | 69834     | turquoise |
| ENSMUSG00000030056 | NA            | NA        | blue      |
| ENSMUSG00000030057 | Cnbp          | 12785     | yellow    |
| ENSMUSG00000030058 | Copg1         | 54161     | turquoise |
| ENSMUSG00000030059 | Tmf1          | 232286    | turquoise |
| ENSMUSG00000058773 | Hist1h1b      | 56702     | magenta   |
| ENSMUSG00000106288 | NA            | NA        | pink      |
| ENSMUSG00000076432 | Ywhaq         | 22630     | black     |
| ENSMUSG00000048264 | Dip2c         | 208440    | turquoise |
| ENSMUSG00000093674 | Rpl41         | 67945     | black     |
| ENSMUSG00000009630 | Ppp2cb        | 19053     | turquoise |
| ENSMUSG00000026872 | Zeb2          | 24136     | green     |
| ENSMUSG00000076437 | 2700094K13Rik | 72657     | black     |
| ENSMUSG00000102555 | NA            | NA        | yellow    |
| ENSMUSG00000026873 | Phf19         | 74016     | magenta   |
| ENSMUSG00000009633 | G0s2          | 14373     | turquoise |
| ENSMUSG00000083169 | NA            | NA        | turquoise |
| ENSMUSG00000023092 | Fhl1          | 14199     | turquoise |
| ENSMUSG00000037805 | Rpl10a        | 19896     | black     |
| ENSMUSG00000044533 | Rps2          | 16898     | blue      |
| ENSMUSG00000026878 | Rab14         | 68365     | turquoise |

|                    |          |           |             |
|--------------------|----------|-----------|-------------|
| ENSMUSG00000023094 | Msrb2    | 76467     | turquoise   |
| ENSMUSG00000026879 | Gsn      | 227753    | yellow      |
| ENSMUSG00000034021 | Pds5b    | 100710    | green       |
| ENSMUSG00000034022 | Cpsf1    | 94230     | green       |
| ENSMUSG00000037808 | Fam76b   | 72826     | red         |
| ENSMUSG00000072704 | Smim10l1 | 381820    | turquoise   |
| ENSMUSG00000034023 | Fancd2   | 211651    | magenta     |
| ENSMUSG00000034024 | Cct2     | 12461     | red         |
| ENSMUSG00000061778 | Mospd2   | 76763     | yellow      |
| ENSMUSG00000005907 | Pex1     | 71382     | turquoise   |
| ENSMUSG00000002129 | Sf3a1    | 67465     | green       |
| ENSMUSG00000079988 | NA       | NA        | black       |
| ENSMUSG00000037570 | Mcrs1    | 51812     | turquoise   |
| ENSMUSG00000097649 | NA       | NA        | yellow      |
| ENSMUSG00000037572 | Wdhd1    | 218973    | salmon      |
| ENSMUSG00000037573 | Tob1     | 22057     | yellow      |
| ENSMUSG00000087138 | Gm15545  | 100502630 | blue        |
| ENSMUSG00000048503 | Tmem136  | 235300    | yellow      |
| ENSMUSG00000072476 | NA       | NA        | red         |
| ENSMUSG00000027067 | Ssrp1    | 20833     | red         |
| ENSMUSG00000005674 | Tomm40l  | 641376    | turquoise   |
| ENSMUSG00000055239 | Kcmf1    | 74287     | turquoise   |
| ENSMUSG00000090136 | Gm10177  | 100042561 | blue        |
| ENSMUSG00000090137 | Uba52    | 22186     | red         |
| ENSMUSG00000005677 | Nr1i3    | 12355     | turquoise   |
| ENSMUSG00000030060 | Hmces    | 232210    | blue        |
| ENSMUSG00000033845 | Mrpl15   | 27395     | red         |
| ENSMUSG00000030061 | Uba3     | 22200     | turquoise   |
| ENSMUSG00000030062 | Rpn1     | 103963    | brown       |
| ENSMUSG00000030064 | Frmd4b   | 232288    | blue        |
| ENSMUSG00000033849 | NA       | NA        | turquoise   |
| ENSMUSG00000001942 | Siae     | 22619     | turquoise   |
| ENSMUSG00000030067 | Foxp1    | 108655    | blue        |
| ENSMUSG00000048271 | Rbm33    | 381626    | blue        |
| ENSMUSG00000076441 | Ass1     | 11898     | greenyellow |
| ENSMUSG00000093686 | NA       | NA        | pink        |
| ENSMUSG00000102562 | NA       | NA        | turquoise   |
| ENSMUSG00000048277 | Syng2    | 20973     | turquoise   |
| ENSMUSG00000009640 | Dmap1    | 66233     | blue        |
| ENSMUSG00000048279 | Sacs     | 50720     | red         |
| ENSMUSG00000026883 | Dab2ip   | 69601     | turquoise   |
| ENSMUSG00000059208 | Hnrnpm   | 76936     | green       |
| ENSMUSG00000083179 | NA       | NA        | blue        |
| ENSMUSG00000027300 | Ubox5    | 140629    | blue        |
| ENSMUSG00000026887 | Mrrf     | 67871     | turquoise   |
| ENSMUSG00000037815 | Ctnna1   | 12385     | green       |
| ENSMUSG00000009647 | Mcu      | 215999    | turquoise   |
| ENSMUSG00000037816 | Fbxw17   | 109082    | grey60      |
| ENSMUSG00000026889 | Rbm18    | 67889     | green       |
| ENSMUSG00000027303 | Ptpa     | 19262     | turquoise   |
| ENSMUSG00000027304 | Rtf1     | 76246     | red         |
| ENSMUSG00000034032 | Rpap1    | 68925     | blue        |
| ENSMUSG00000027305 | Ndufaf1  | 69702     | blue        |
| ENSMUSG00000037818 | Abhd18   | 269423    | turquoise   |

|                    |               |        |             |
|--------------------|---------------|--------|-------------|
| ENSMUSG00000061787 | Rps17         | 20068  | black       |
| ENSMUSG00000062202 | Btbd9         | 224671 | turquoise   |
| ENSMUSG00000027306 | Nusap1        | 108907 | magenta     |
| ENSMUSG00000062203 | NA            | NA     | red         |
| ENSMUSG00000012640 | Zfp715        | 69930  | pink        |
| ENSMUSG00000027309 | 4930402H24Rik | 228602 | red         |
| ENSMUSG00000040811 | Eml2          | 72205  | turquoise   |
| ENSMUSG00000040812 | Agbl2         | 271813 | turquoise   |
| ENSMUSG00000005917 | Otx1          | 18423  | turquoise   |
| ENSMUSG00000040813 | Tex264        | 21767  | brown       |
| ENSMUSG00000030301 | Ccdc91        | 67015  | blue        |
| ENSMUSG00000030302 | Atp2b2        | 11941  | brown       |
| ENSMUSG00000030303 | Far2          | 330450 | turquoise   |
| ENSMUSG00000030304 | Ergic2        | 67456  | blue        |
| ENSMUSG00000040818 | Dennd6a       | 211922 | turquoise   |
| ENSMUSG00000030307 | Slc6a11       | 243616 | purple      |
| ENSMUSG00000030309 | Caprin2       | 232560 | turquoise   |
| ENSMUSG00000087143 | NA            | NA     | brown       |
| ENSMUSG00000097657 | NA            | NA     | turquoise   |
| ENSMUSG00000106535 | NA            | NA     | yellow      |
| ENSMUSG00000106536 | NA            | NA     | turquoise   |
| ENSMUSG00000055240 | Zfp101        | 22643  | blue        |
| ENSMUSG00000038000 | Acd           | 497652 | blue        |
| ENSMUSG00000038002 | Cramp11       | 57354  | turquoise   |
| ENSMUSG00000083411 | NA            | NA     | blue        |
| ENSMUSG00000082998 | NA            | NA     | turquoise   |
| ENSMUSG00000027076 | Timm10        | 30059  | brown       |
| ENSMUSG00000038005 | 2700029M09Rik | 72612  | red         |
| ENSMUSG00000027078 | Ube2l6        | 56791  | cyan        |
| ENSMUSG00000005682 | Pan2          | 103135 | blue        |
| ENSMUSG00000027079 | Clp1          | 98985  | blue        |
| ENSMUSG00000005683 | Cs            | 12974  | turquoise   |
| ENSMUSG00000005686 | Ampd3         | 11717  | turquoise   |
| ENSMUSG00000051510 | NA            | NA     | turquoise   |
| ENSMUSG00000005687 | Bcas2         | 68183  | greenyellow |
| ENSMUSG00000023345 | Poc1a         | 70235  | blue        |
| ENSMUSG00000041000 | Trim62        | 67525  | turquoise   |
| ENSMUSG00000040586 | Ofd1          | 237222 | blue        |
| ENSMUSG00000016619 | Nup50         | 18141  | blue        |
| ENSMUSG00000051515 | NA            | NA     | turquoise   |
| ENSMUSG00000023348 | Trip6         | 22051  | brown       |
| ENSMUSG00000051517 | Arhgef39      | 230098 | magenta     |
| ENSMUSG00000051518 | Rps19bp1      | 66538  | pink        |
| ENSMUSG00000030079 | Ruvbl1        | 56505  | red         |
| ENSMUSG00000048280 | Zfp738        | 408068 | blue        |
| ENSMUSG00000058793 | Cds2          | 110911 | turquoise   |
| ENSMUSG00000102570 | NA            | NA     | turquoise   |
| ENSMUSG00000058799 | Nap111        | 53605  | red         |
| ENSMUSG00000069727 | Gm5595        | 434179 | turquoise   |
| ENSMUSG00000086968 | 4933431E20Rik | 329735 | turquoise   |
| ENSMUSG00000094111 | NA            | NA     | blue        |
| ENSMUSG00000069729 | Arid1b        | 239985 | brown       |
| ENSMUSG00000026893 | Gca           | 227960 | turquoise   |
| ENSMUSG00000016382 | Pls3          | 102866 | turquoise   |

|                    |               |        |             |
|--------------------|---------------|--------|-------------|
| ENSMUSG00000026895 | Ndufa8        | 68375  | turquoise   |
| ENSMUSG00000037822 | Smim14        | 68552  | turquoise   |
| ENSMUSG00000044550 | Tceal3        | 594844 | purple      |
| ENSMUSG00000037824 | Tspan14       | 52588  | turquoise   |
| ENSMUSG00000027312 | Atrn          | 11990  | yellow      |
| ENSMUSG00000016386 | Mpped2        | 77015  | turquoise   |
| ENSMUSG00000037826 | Ppm1k         | 243382 | yellow      |
| ENSMUSG00000062210 | Tnfaip8       | 106869 | turquoise   |
| ENSMUSG00000034042 | Gppb11i       | 77110  | turquoise   |
| ENSMUSG00000037827 | NA            | NA     | greenyellow |
| ENSMUSG00000051285 | Pcmttd1       | 319263 | turquoise   |
| ENSMUSG00000040820 | Hlcs          | 110948 | turquoise   |
| ENSMUSG00000040822 | 1700123O20Ril | 58248  | brown       |
| ENSMUSG00000030310 | Slc6a1        | 232333 | turquoise   |
| ENSMUSG00000040824 | NA            | NA     | black       |
| ENSMUSG00000030313 | Dennd5b       | 320560 | blue        |
| ENSMUSG00000030314 | Atg7          | 74244  | turquoise   |
| ENSMUSG00000030315 | NA            | NA     | turquoise   |
| ENSMUSG00000030316 | Tamm41        | 68971  | turquoise   |
| ENSMUSG00000030317 | NA            | NA     | purple      |
| ENSMUSG00000069495 | Epc2          | 227867 | blue        |
| ENSMUSG00000030319 | Cand2         | 67088  | red         |
| ENSMUSG00000087153 | NA            | NA     | turquoise   |
| ENSMUSG00000027080 | Med19         | 381379 | blue        |
| ENSMUSG00000093930 | Hmgcs1        | 208715 | turquoise   |
| ENSMUSG00000087159 | NA            | NA     | turquoise   |
| ENSMUSG00000038010 | Ccdc138       | 76138  | red         |
| ENSMUSG00000055254 | Ntrk2         | 18212  | red         |
| ENSMUSG00000065767 | NA            | NA     | grey60      |
| ENSMUSG00000038013 | Wipf2         | 68524  | turquoise   |
| ENSMUSG00000090150 | Acad11        | 102632 | yellow      |
| ENSMUSG00000027086 | Fastkd1       | 320720 | turquoise   |
| ENSMUSG00000083422 | NA            | NA     | pink        |
| ENSMUSG00000038014 | Fam120a       | 218236 | brown       |
| ENSMUSG00000027087 | Itgav         | 16410  | yellow      |
| ENSMUSG00000027088 | Phospho2      | 73373  | brown       |
| ENSMUSG00000033862 | Cdk10         | 234854 | red         |
| ENSMUSG00000033863 | Klf9          | 16601  | greenyellow |
| ENSMUSG00000040591 | 1110051M20Ril | 228356 | turquoise   |
| ENSMUSG00000083429 | NA            | NA     | blue        |
| ENSMUSG00000016624 | Phf21b        | 271305 | yellow      |
| ENSMUSG00000040594 | Ranbp17       | 66011  | pink        |
| ENSMUSG00000005698 | Ctcf          | 13018  | brown       |
| ENSMUSG00000023353 | Agap3         | 213990 | turquoise   |
| ENSMUSG00000005699 | Pard6a        | 56513  | pink        |
| ENSMUSG00000030082 | Sec61a1       | 53421  | turquoise   |
| ENSMUSG00000030083 | Abtb1         | 80283  | turquoise   |
| ENSMUSG00000040596 | Pogk          | 71592  | green       |
| ENSMUSG00000030084 | Plxna1        | 18844  | turquoise   |
| ENSMUSG00000040599 | Mis12         | 67139  | magenta     |
| ENSMUSG00000030086 | Chchd6        | 66098  | purple      |
| ENSMUSG00000001962 | Fam50a        | 108160 | blue        |
| ENSMUSG00000030087 | Klf15         | 66277  | turquoise   |
| ENSMUSG00000030088 | Aldh1l1       | 107747 | blue        |

|                     |               |        |             |
|---------------------|---------------|--------|-------------|
| ENSMUSG0000001964   | Emd           | 13726  | blue        |
| ENSMUSG00000083192  | NA            | NA     | turquoise   |
| ENSMUSG00000097904  | NA            | NA     | turquoise   |
| ENSMUSG00000097906  | NA            | NA     | green       |
| ENSMUSG00000094122  | NA            | NA     | pink        |
| ENSMUSG00000083199  | NA            | NA     | blue        |
| ENSMUSG00000044562  | Rasip1        | 69903  | green       |
| ENSMUSG00000027323  | NA            | NA     | green       |
| ENSMUSG00000027326  | Casc5         | 76464  | magenta     |
| ENSMUSG000000103009 | NA            | NA     | yellow      |
| ENSMUSG00000034055  | Phka1         | 18679  | blue        |
| ENSMUSG00000027329  | Spef1         | 70997  | green       |
| ENSMUSG00000034059  | NA            | NA     | turquoise   |
| ENSMUSG00000005936  | Kctd20        | 66989  | red         |
| ENSMUSG00000030322  | Mbd4          | 17193  | turquoise   |
| ENSMUSG00000030323  | Ift122        | 81896  | turquoise   |
| ENSMUSG00000030327  | Necap1        | 67602  | turquoise   |
| ENSMUSG000000106551 | NA            | NA     | brown       |
| ENSMUSG000000097679 | NA            | NA     | pink        |
| ENSMUSG000000106558 | NA            | NA     | yellow      |
| ENSMUSG00000027091  | Zc3h15        | 69082  | green       |
| ENSMUSG00000038022  | Fam188b       | 330323 | turquoise   |
| ENSMUSG00000090160  | 4930480K15Rik | 78800  | turquoise   |
| ENSMUSG00000038023  | Atp6v0a2      | 21871  | turquoise   |
| ENSMUSG00000048537  | Phldb1        | 102693 | blue        |
| ENSMUSG00000038024  | Dennd4c       | 329877 | yellow      |
| ENSMUSG00000038025  | Phf2          | 18676  | green       |
| ENSMUSG000000102824 | NA            | NA     | green       |
| ENSMUSG00000027099  | NA            | NA     | red         |
| ENSMUSG000000102827 | NA            | NA     | blue        |
| ENSMUSG00000009905  | Kdsr          | 70750  | yellow      |
| ENSMUSG00000083439  | NA            | NA     | turquoise   |
| ENSMUSG00000009907  | NA            | NA     | brown       |
| ENSMUSG00000030091  | Nup210        | 54563  | black       |
| ENSMUSG00000016637  | Ift27         | 67042  | turquoise   |
| ENSMUSG00000030093  | Wnt7a         | 22421  | purple      |
| ENSMUSG00000030094  | Xpc           | 22591  | grey60      |
| ENSMUSG00000044807  | Zfp354c       | 30944  | green       |
| ENSMUSG00000023367  | Tmem176a      | 66058  | purple      |
| ENSMUSG00000030095  | Tmem43        | 74122  | green       |
| ENSMUSG00000006127  | Inpp5k        | 19062  | yellow      |
| ENSMUSG00000030096  | Slc6a6        | 21366  | turquoise   |
| ENSMUSG00000051537  | Gm5124        | 331392 | cyan        |
| ENSMUSG00000041025  | Iffo2         | 212632 | yellow      |
| ENSMUSG00000041028  | Ghitm         | 66092  | blue        |
| ENSMUSG00000069744  | Psmb3         | 26446  | brown       |
| ENSMUSG00000087403  | NA            | NA     | yellow      |
| ENSMUSG00000059237  | NA            | NA     | turquoise   |
| ENSMUSG00000097919  | NA            | NA     | pink        |
| ENSMUSG00000087406  | E130215H24Rik | 109344 | turquoise   |
| ENSMUSG00000087408  | Gdf1          | 14559  | greenyellow |
| ENSMUSG00000027330  | Cdc25b        | 12531  | blue        |
| ENSMUSG000000103013 | NA            | NA     | turquoise   |
| ENSMUSG00000027331  | NA            | NA     | magenta     |

|                     |               |    |        |              |
|---------------------|---------------|----|--------|--------------|
| ENSMUSG00000044573  | Acp1          |    | 11431  | blue         |
| ENSMUSG00000037845  | NA            | NA |        | pink         |
| ENSMUSG00000027332  | Ivd           |    | 56357  | yellow       |
| ENSMUSG00000037846  | Rtkn2         |    | 170799 | magenta      |
| ENSMUSG00000027333  | Smox          |    | 228608 | yellow       |
| ENSMUSG00000037847  | Nmrk1         |    | 225994 | yellow       |
| ENSMUSG00000044576  | Gareml        |    | 242915 | yellow       |
| ENSMUSG00000034064  | Poglut1       |    | 224143 | red          |
| ENSMUSG00000062232  | Rapgef2       |    | 76089  | turquoise    |
| ENSMUSG00000062234  | Gak           |    | 231580 | brown        |
| ENSMUSG00000027339  | Rassf2        |    | 215653 | midnightblue |
| ENSMUSG00000040841  | Six5          |    | 20475  | turquoise    |
| ENSMUSG00000040842  | Szrd1         |    | 213491 | turquoise    |
| ENSMUSG00000030330  | Ing4          |    | 28019  | turquoise    |
| ENSMUSG00000040843  | Tiprl         |    | 226591 | brown        |
| ENSMUSG00000005949  | Ctns          |    | 83429  | turquoise    |
| ENSMUSG00000030335  | NA            | NA |        | turquoise    |
| ENSMUSG00000040848  | Sft2d2        |    | 108735 | turquoise    |
| ENSMUSG00000030336  | Cd27          |    | 21940  | turquoise    |
| ENSMUSG00000030337  | Vamp1         |    | 22317  | yellow       |
| ENSMUSG00000030339  | Ltbr          |    | 17000  | yellow       |
| ENSMUSG00000106562  | NA            | NA |        | pink         |
| ENSMUSG00000087174  | 5530601H04Rik |    | 71445  | turquoise    |
| ENSMUSG00000098102  | NA            | NA |        | yellow       |
| ENSMUSG00000087177  | E130307A14Rik |    | 327744 | turquoise    |
| ENSMUSG00000098104  | NA            | NA |        | turquoise    |
| ENSMUSG00000098105  | NA            | NA |        | turquoise    |
| ENSMUSG00000087178  | NA            | NA |        | turquoise    |
| ENSMUSG00000106568  | NA            | NA |        | brown        |
| ENSMUSG00000048546  | Tob2          |    | 57259  | turquoise    |
| ENSMUSG00000038034  | Igsf8         |    | 140559 | green        |
| ENSMUSG00000083443  | NA            | NA |        | green        |
| ENSMUSG00000038039  | Gcc2          |    | 70297  | yellow       |
| ENSMUSG00000033883  | D3Ert254e     |    | 241944 | turquoise    |
| ENSMUSG00000083449  | NA            | NA |        | blue         |
| ENSMUSG00000033885  | Pxk           |    | 218699 | turquoise    |
| ENSMUSG00000034300  | Fam53c        |    | 66306  | blue         |
| ENSMUSG00000006134  | NA            | NA |        | turquoise    |
| ENSMUSG000000051548 | NA            | NA |        | blue         |
| ENSMUSG00000041037  | Irgq          |    | 210146 | brown        |
| ENSMUSG00000002409  | Dyrk1b        |    | 13549  | turquoise    |
| ENSMUSG00000097922  | NA            | NA |        | yellow       |
| ENSMUSG00000069755  | NA            | NA |        | blue         |
| ENSMUSG00000087412  | NA            | NA |        | black        |
| ENSMUSG00000097926  | NA            | NA |        | turquoise    |
| ENSMUSG00000087413  | NA            | NA |        | turquoise    |
| ENSMUSG00000009681  | Bcr           |    | 110279 | turquoise    |
| ENSMUSG00000106803  | NA            | NA |        | turquoise    |
| ENSMUSG00000037851  | Iars          |    | 105148 | green        |
| ENSMUSG00000059248  | 8-Sep         |    | 53860  | blue         |
| ENSMUSG00000037852  | Cpe           |    | 12876  | red          |
| ENSMUSG00000027340  | Slc23a2       |    | 54338  | turquoise    |
| ENSMUSG00000027341  | Tmem230       |    | 70612  | blue         |
| ENSMUSG00000027342  | Pcna          |    | 18538  | salmon       |

|                    |               |        |             |
|--------------------|---------------|--------|-------------|
| ENSMUSG00000034071 | Zfp551        | 619331 | turquoise   |
| ENSMUSG00000037857 | NA            | NA     | turquoise   |
| ENSMUSG00000027346 | Gpcpd1        | 74182  | turquoise   |
| ENSMUSG00000034075 | Zdhhc5        | 228136 | brown       |
| ENSMUSG00000027349 | Fam98b        | 68215  | blue        |
| ENSMUSG00000040850 | Psme4         | 103554 | pink        |
| ENSMUSG00000062248 | Cks2          | 66197  | magenta     |
| ENSMUSG00000005958 | Ephb3         | 13845  | yellow      |
| ENSMUSG00000030341 | Tnfrsf1a      | 21937  | blue        |
| ENSMUSG00000030342 | Cd9           | 12527  | yellow      |
| ENSMUSG00000030346 | Rad51ap1      | 19362  | magenta     |
| ENSMUSG00000040859 | Bsdc1         | 100383 | turquoise   |
| ENSMUSG00000030347 | D6Wsu163e     | 28040  | turquoise   |
| ENSMUSG00000106570 | NA            | NA     | yellow      |
| ENSMUSG00000097695 | NA            | NA     | turquoise   |
| ENSMUSG00000106572 | 4933417G07Rif | 71182  | turquoise   |
| ENSMUSG00000098111 | NA            | NA     | greenyellow |
| ENSMUSG00000106574 | NA            | NA     | turquoise   |
| ENSMUSG00000098113 | NA            | NA     | turquoise   |
| ENSMUSG00000048550 | Thnsl1        | 208967 | yellow      |
| ENSMUSG00000038042 | Ptpdc1        | 218232 | turquoise   |
| ENSMUSG00000083454 | NA            | NA     | tan         |
| ENSMUSG00000038046 | Rnmtl1        | 67390  | lightcyan   |
| ENSMUSG00000038047 | Haus6         | 230376 | green       |
| ENSMUSG00000083458 | NA            | NA     | turquoise   |
| ENSMUSG00000051550 | Zfp579        | 68490  | green       |
| ENSMUSG00000009927 | Rps25         | 75617  | black       |
| ENSMUSG00000034311 | Kif4          | 16571  | magenta     |
| ENSMUSG00000034312 | Iqsec1        | 232227 | purple      |
| ENSMUSG00000041040 | Fam117b       | 72750  | turquoise   |
| ENSMUSG00000051557 | Pusl1         | 433813 | blue        |
| ENSMUSG00000034317 | Trim59        | 66949  | magenta     |
| ENSMUSG00000001995 | Sipa1l2       | 244668 | brown       |
| ENSMUSG00000001998 | Ap4e1         | 108011 | turquoise   |
| ENSMUSG00000001999 | Blvra         | 109778 | brown       |
| ENSMUSG00000002413 | Braf          | 109880 | turquoise   |
| ENSMUSG00000002416 | Ndufb2        | 68198  | turquoise   |
| ENSMUSG00000059252 | NA            | NA     | pink        |
| ENSMUSG00000097935 | NA            | NA     | greenyellow |
| ENSMUSG00000069769 | Msi2          | 76626  | yellow      |
| ENSMUSG00000106813 | NA            | NA     | turquoise   |
| ENSMUSG00000027351 | Spred1        | 114715 | turquoise   |
| ENSMUSG00000072761 | NA            | NA     | turquoise   |
| ENSMUSG00000103034 | NA            | NA     | green       |
| ENSMUSG00000072762 | NA            | NA     | pink        |
| ENSMUSG00000027353 | Mcm8          | 66634  | salmon      |
| ENSMUSG00000072763 | NA            | NA     | turquoise   |
| ENSMUSG00000055523 | Gucy2g        | 73707  | yellow      |
| ENSMUSG00000034083 | Ccdc174       | 232236 | blue        |
| ENSMUSG00000027357 | Crls1         | 66586  | turquoise   |
| ENSMUSG00000034088 | Hdlbp         | 110611 | red         |
| ENSMUSG00000040860 | Crocc         | 230872 | turquoise   |
| ENSMUSG00000030352 | Tspan9        | 109246 | turquoise   |
| ENSMUSG00000040865 | Ino80d        | 227195 | yellow      |



|                     |               |           |             |
|---------------------|---------------|-----------|-------------|
| ENSMUSG00000030357  | Fkbp4         | 14228     | blue        |
| ENSMUSG00000098120  | Gm5914        | 546100    | brown       |
| ENSMUSG00000098123  | NA            | NA        | turquoise   |
| ENSMUSG00000107000  | NA            | NA        | brown       |
| ENSMUSG00000107002  | 0610012G03Rih | 106264    | green       |
| ENSMUSG00000048562  | Sp8           | 320145    | grey60      |
| ENSMUSG00000083460  | NA            | NA        | turquoise   |
| ENSMUSG00000107006  | NA            | NA        | yellow      |
| ENSMUSG00000038055  | Dexi          | 58239     | turquoise   |
| ENSMUSG00000055296  | NA            | NA        | turquoise   |
| ENSMUSG00000102854  | NA            | NA        | yellow      |
| ENSMUSG00000083465  | NA            | NA        | turquoise   |
| ENSMUSG00000038056  | Kmt2c         | 231051    | turquoise   |
| ENSMUSG00000023391  | Dlx2          | 13392     | cyan        |
| ENSMUSG00000016664  | Pacsin2       | 23970     | brown       |
| ENSMUSG00000034321  | Exosc1        | 66583     | salmon      |
| ENSMUSG00000006154  | NA            | NA        | turquoise   |
| ENSMUSG00000034327  | Kctd9         | 105440    | magenta     |
| ENSMUSG00000041057  | Wdr43         | 72515     | blue        |
| ENSMUSG00000034329  | Brip1         | 237911    | magenta     |
| ENSMUSG00000041058  | Wwp1          | 107568    | turquoise   |
| ENSMUSG00000002428  | Hltf          | 20585     | brown       |
| ENSMUSG000000097944 | NA            | NA        | blue        |
| ENSMUSG00000059263  | Usp47         | 74996     | blue        |
| ENSMUSG00000087433  | Gm14167       | 102633071 | turquoise   |
| ENSMUSG00000103042  | NA            | NA        | turquoise   |
| ENSMUSG00000106827  | NA            | NA        | greenyellow |
| ENSMUSG00000072770  | Acrbp         | 54137     | yellow      |
| ENSMUSG00000027361  | Gabpb1        | 14391     | magenta     |
| ENSMUSG00000055531  | Cpsf6         | 432508    | blue        |
| ENSMUSG00000037876  | Jmjd1c        | 108829    | brown       |
| ENSMUSG00000072772  | NA            | NA        | blue        |
| ENSMUSG00000027363  | Usp8          | 84092     | turquoise   |
| ENSMUSG00000027364  | NA            | NA        | yellow      |
| ENSMUSG00000083700  | NA            | NA        | turquoise   |
| ENSMUSG00000103047  | NA            | NA        | turquoise   |
| ENSMUSG00000027365  | Trpm7         | 58800     | brown       |
| ENSMUSG00000027366  | Sppl2a        | 66552     | turquoise   |
| ENSMUSG00000103049  | NA            | NA        | yellow      |
| ENSMUSG00000048807  | Slc35e4       | 103710    | yellow      |
| ENSMUSG00000027367  | Stard7        | 99138     | red         |
| ENSMUSG00000083705  | Gm8624        | 667423    | tan         |
| ENSMUSG00000055538  | Zcchc24       | 71918     | turquoise   |
| ENSMUSG00000005973  | Rcn1          | 19672     | blue        |
| ENSMUSG00000083708  | NA            | NA        | turquoise   |
| ENSMUSG00000098138  | NA            | NA        | turquoise   |
| ENSMUSG00000102861  | NA            | NA        | pink        |
| ENSMUSG00000066232  | Ipo7          | 233726    | red         |
| ENSMUSG00000066233  | Tmem42        | 66079     | blue        |
| ENSMUSG00000048578  | Mlec          | 109154    | green       |
| ENSMUSG00000083474  | NA            | NA        | pink        |
| ENSMUSG00000083477  | NA            | NA        | blue        |
| ENSMUSG00000038069  | Cdkn2aip      | 70925     | blue        |
| ENSMUSG00000027601  | Mtfr1         | 67472     | blue        |

|                    |               |        |              |
|--------------------|---------------|--------|--------------|
| ENSMUSG00000102869 | NA            | NA     | turquoise    |
| ENSMUSG00000027602 | Map1lc3a      | 66734  | turquoise    |
| ENSMUSG00000027603 | Ggt7          | 207182 | turquoise    |
| ENSMUSG00000034333 | Zbed4         | 223773 | grey60       |
| ENSMUSG00000027605 | Acss2         | 60525  | turquoise    |
| ENSMUSG00000044847 | Lsm11         | 72290  | turquoise    |
| ENSMUSG00000006169 | Clint1        | 216705 | grey60       |
| ENSMUSG00000051579 | Tceal8        | 66684  | green        |
| ENSMUSG00000030602 | Pak4          | 70584  | green        |
| ENSMUSG00000030603 | Psmc4         | 23996  | blue         |
| ENSMUSG00000030604 | NA            | NA     | turquoise    |
| ENSMUSG00000030605 | Mfge8         | 17304  | purple       |
| ENSMUSG00000030606 | Hapln3        | 67666  | turquoise    |
| ENSMUSG00000030609 | Aen           | 68048  | yellow       |
| ENSMUSG00000097954 | NA            | NA     | turquoise    |
| ENSMUSG00000059273 | Zc3h4         | 330474 | turquoise    |
| ENSMUSG00000106831 | NA            | NA     | turquoise    |
| ENSMUSG00000097958 | NA            | NA     | blue         |
| ENSMUSG00000059277 | R74862        | 97423  | brown        |
| ENSMUSG00000087445 | NA            | NA     | yellow       |
| ENSMUSG00000059278 | NA            | NA     | red          |
| ENSMUSG00000027371 | Fahd2a        | 68126  | turquoise    |
| ENSMUSG00000037885 | Stk35         | 67333  | turquoise    |
| ENSMUSG00000062270 | Morf4i1       | 21761  | midnightblue |
| ENSMUSG00000037887 | Dusp8         | 18218  | brown        |
| ENSMUSG00000038301 | Snx10         | 71982  | blue         |
| ENSMUSG00000027374 | NA            | NA     | green        |
| ENSMUSG00000038302 | Lace1         | 215951 | turquoise    |
| ENSMUSG00000045031 | Cetn4         | 207175 | turquoise    |
| ENSMUSG00000005980 | Dnase1        | 13419  | turquoise    |
| ENSMUSG00000083713 | NA            | NA     | tan          |
| ENSMUSG00000005981 | Trap1         | 68015  | green        |
| ENSMUSG00000038305 | Spats2l       | 67198  | turquoise    |
| ENSMUSG00000027378 | Nphp1         | 53885  | magenta      |
| ENSMUSG00000005982 | Naa60         | 74763  | blue         |
| ENSMUSG00000027379 | NA            | NA     | magenta      |
| ENSMUSG00000072789 | NA            | NA     | salmon       |
| ENSMUSG00000083716 | NA            | NA     | black        |
| ENSMUSG00000005986 | Ankrd13d      | 68423  | turquoise    |
| ENSMUSG00000045038 | Prkce         | 18754  | yellow       |
| ENSMUSG00000040883 | Tmem205       | 235043 | yellow       |
| ENSMUSG00000045039 | Megf8         | 269878 | turquoise    |
| ENSMUSG00000051811 | Cox6b2        | 333182 | blue         |
| ENSMUSG00000030374 | Strn4         | 97387  | turquoise    |
| ENSMUSG00000040888 | Gfer          | 11692  | cyan         |
| ENSMUSG00000041303 | NA            | NA     | grey60       |
| ENSMUSG00000051817 | Sox12         | 20667  | pink         |
| ENSMUSG00000041308 | Sntb2         | 20650  | yellow       |
| ENSMUSG00000098141 | NA            | NA     | turquoise    |
| ENSMUSG00000098142 | NA            | NA     | turquoise    |
| ENSMUSG00000107020 | NA            | NA     | turquoise    |
| ENSMUSG00000048581 | E130311K13Rik | 329659 | turquoise    |
| ENSMUSG00000038070 | Cntln         | 338349 | turquoise    |
| ENSMUSG00000059511 | NA            | NA     | yellow       |

|                    |          |        |           |
|--------------------|----------|--------|-----------|
| ENSMUSG00000098149 | NA       | NA     | turquoise |
| ENSMUSG00000038072 | Galnt11  | 231050 | turquoise |
| ENSMUSG00000107026 | NA       | NA     | tan       |
| ENSMUSG00000083482 | NA       | NA     | blue      |
| ENSMUSG00000038074 | Fkbp14   | 231997 | yellow    |
| ENSMUSG00000094410 | NA       | NA     | cyan      |
| ENSMUSG00000083483 | NA       | NA     | tan       |
| ENSMUSG00000066245 | NA       | NA     | red       |
| ENSMUSG00000059518 | Znhit1   | 70103  | black     |
| ENSMUSG00000038079 | Tmem237  | 381259 | turquoise |
| ENSMUSG00000027610 | Gss      | 14854  | turquoise |
| ENSMUSG00000034341 | Wbp2     | 22378  | turquoise |
| ENSMUSG00000027613 | Eif6     | 16418  | red       |
| ENSMUSG00000034342 | Cbl      | 12402  | blue      |
| ENSMUSG00000062510 | Nsl1     | 381318 | magenta   |
| ENSMUSG00000027615 | Hps3     | 12807  | brown     |
| ENSMUSG00000034343 | Ube2f    | 67921  | turquoise |
| ENSMUSG00000044857 | Lemd2    | 224640 | turquoise |
| ENSMUSG00000034345 | Gtf2h5   | 66467  | green     |
| ENSMUSG00000051586 | Mical3   | 194401 | turquoise |
| ENSMUSG00000027618 | Nfs1     | 18041  | turquoise |
| ENSMUSG00000041075 | Fzd7     | 14369  | yellow    |
| ENSMUSG00000034349 | Smc4     | 70099  | red       |
| ENSMUSG00000041079 | Rwdd2b   | 53858  | brown     |
| ENSMUSG00000062519 | Zfp398   | 272347 | turquoise |
| ENSMUSG00000030611 | Mrps11   | 67994  | blue      |
| ENSMUSG00000030612 | Mrpl46   | 67308  | green     |
| ENSMUSG00000020100 | Slc29a3  | 71279  | turquoise |
| ENSMUSG00000030613 | Ccdc90b  | 66365  | green     |
| ENSMUSG00000030614 | NA       | NA     | blue      |
| ENSMUSG00000030615 | Tmem126a | 66271  | green     |
| ENSMUSG00000069793 | Sifn9    | 237886 | blue      |
| ENSMUSG00000030619 | Eed      | 13626  | blue      |
| ENSMUSG00000020107 | Anapc16  | 52717  | turquoise |
| ENSMUSG00000020108 | Ddit4    | 74747  | turquoise |
| ENSMUSG00000020109 | Dnajb12  | 56709  | blue      |
| ENSMUSG00000037890 | Wdr19    | 213081 | turquoise |
| ENSMUSG00000059288 | Cdyl     | 12593  | turquoise |
| ENSMUSG00000106846 | NA       | NA     | brown     |
| ENSMUSG00000037892 | Pcdh18   | 73173  | brown     |
| ENSMUSG00000106847 | Peg13    | 353342 | turquoise |
| ENSMUSG00000037894 | H2afz    | 51788  | red       |
| ENSMUSG00000037896 | Rcor1    | 217864 | red       |
| ENSMUSG00000094189 | NA       | NA     | turquoise |
| ENSMUSG00000027384 | Ndufaf5  | 69487  | blue      |
| ENSMUSG00000083720 | NA       | NA     | pink      |
| ENSMUSG00000055553 | Kxd1     | 75620  | blue      |
| ENSMUSG00000038312 | Edem2    | 108687 | red       |
| ENSMUSG00000083721 | NA       | NA     | pink      |
| ENSMUSG00000048827 | Pkd1l3   | 244646 | yellow    |
| ENSMUSG00000062284 | Gm6030   | 547267 | tan       |
| ENSMUSG00000045045 | Lrfr4    | 225875 | brown     |
| ENSMUSG00000016921 | Srsf6    | 67996  | black     |
| ENSMUSG00000030380 | Mzf1     | 109889 | brown     |

|                    |               |        |              |
|--------------------|---------------|--------|--------------|
| ENSMUSG00000006412 | NA            | NA     | black        |
| ENSMUSG00000041313 | Slc7a1        | 11987  | salmon       |
| ENSMUSG00000030386 | Zfp606        | 67370  | grey60       |
| ENSMUSG00000006418 | Rnf114        | 81018  | blue         |
| ENSMUSG00000041319 | Thoc6         | 386612 | blue         |
| ENSMUSG00000098154 | NA            | NA     | turquoise    |
| ENSMUSG00000098156 | NA            | NA     | turquoise    |
| ENSMUSG00000038080 | Kdm1b         | 218214 | yellow       |
| ENSMUSG00000107035 | NA            | NA     | red          |
| ENSMUSG00000038084 | Opa1          | 74143  | blue         |
| ENSMUSG00000038085 | Cnbd2         | 70873  | yellow       |
| ENSMUSG00000083496 | NA            | NA     | tan          |
| ENSMUSG00000066258 | Trim12a       | 76681  | turquoise    |
| ENSMUSG00000027620 | Rbm39         | 170791 | midnightblue |
| ENSMUSG00000044864 | Ankrd50       | 99696  | turquoise    |
| ENSMUSG00000034353 | Ramp1         | 51801  | purple       |
| ENSMUSG00000034354 | Mtmr3         | 74302  | brown        |
| ENSMUSG00000103309 | NA            | NA     | turquoise    |
| ENSMUSG00000041084 | Ostc          | 66357  | green        |
| ENSMUSG00000027628 | Aar2          | 68295  | turquoise    |
| ENSMUSG00000017119 | Nbr1          | 17966  | green        |
| ENSMUSG00000030621 | Me3           | 109264 | black        |
| ENSMUSG00000002455 | Prpf6         | 68879  | blue         |
| ENSMUSG00000020111 | Micu1         | 216001 | turquoise    |
| ENSMUSG00000002458 | Rgs19         | 56470  | red          |
| ENSMUSG00000097971 | NA            | NA     | yellow       |
| ENSMUSG00000020114 | Cand1         | 71902  | blue         |
| ENSMUSG00000002459 | Rgs20         | 58175  | pink         |
| ENSMUSG00000020115 | Tbk1          | 56480  | blue         |
| ENSMUSG00000059291 | NA            | NA     | black        |
| ENSMUSG00000097973 | NA            | NA     | turquoise    |
| ENSMUSG00000020116 | Pno1          | 66249  | green        |
| ENSMUSG00000030629 | Zfand6        | 65098  | green        |
| ENSMUSG00000097974 | NA            | NA     | turquoise    |
| ENSMUSG00000094191 | NA            | NA     | brown        |
| ENSMUSG00000097977 | NA            | NA     | turquoise    |
| ENSMUSG00000097979 | NA            | NA     | greenyellow  |
| ENSMUSG00000048832 | Vps37c        | 107305 | turquoise    |
| ENSMUSG00000048833 | Slc39a9       | 328133 | brown        |
| ENSMUSG00000027394 | Ttl           | 69737  | lightcyan    |
| ENSMUSG00000027395 | Polr1b        | 20017  | blue         |
| ENSMUSG00000090460 | NA            | NA     | pink         |
| ENSMUSG00000038323 | 1700066M21Ril | 73467  | blue         |
| ENSMUSG00000038324 | Trpc4ap       | 56407  | blue         |
| ENSMUSG00000027397 | Slc20a1       | 20515  | yellow       |
| ENSMUSG00000083734 | NA            | NA     | yellow       |
| ENSMUSG00000045055 | NA            | NA     | black        |
| ENSMUSG00000083737 | NA            | NA     | blue         |
| ENSMUSG00000016933 | Plcg1         | 18803  | green        |
| ENSMUSG00000090467 | NA            | NA     | tan          |
| ENSMUSG00000013150 | NA            | NA     | turquoise    |
| ENSMUSG00000006423 | C330007P06Ril | 77644  | turquoise    |
| ENSMUSG00000030393 | Zik1          | 22775  | red          |
| ENSMUSG00000013155 | Enkd1         | 102124 | blue         |

|                     |               |        |              |
|---------------------|---------------|--------|--------------|
| ENSMUSG00000030397  | Mark4         | 232944 | green        |
| ENSMUSG00000041328  | Pcf11         | 74737  | turquoise    |
| ENSMUSG00000041329  | Atp1b2        | 11932  | purple       |
| ENSMUSG00000087701  | NA            | NA     | black        |
| ENSMUSG00000038094  | Atp13a4       | 224079 | purple       |
| ENSMUSG00000059534  | Uqcr10        | 66152  | midnightblue |
| ENSMUSG00000038095  | Sbno1         | 243272 | turquoise    |
| ENSMUSG00000027630  | Tbl1xr1       | 81004  | turquoise    |
| ENSMUSG00000006191  | Cdkal1        | 68916  | blue         |
| ENSMUSG000000103314 | NA            | NA     | yellow       |
| ENSMUSG00000034361  | Cpne2         | 234577 | greenyellow  |
| ENSMUSG00000027634  | Ndr3          | 29812  | turquoise    |
| ENSMUSG00000044876  | Zfp444        | 72667  | blue         |
| ENSMUSG000000103317 | NA            | NA     | turquoise    |
| ENSMUSG00000027635  | Dsn1          | 66934  | red          |
| ENSMUSG00000027637  | 1110008F13Rik | 67388  | blue         |
| ENSMUSG00000027639  | Samhd1        | 56045  | pink         |
| ENSMUSG00000041096  | Tspsyl2       | 52808  | turquoise    |
| ENSMUSG00000030630  | Fah           | 14085  | turquoise    |
| ENSMUSG00000023904  | NA            | NA     | midnightblue |
| ENSMUSG00000020121  | Srgap1        | 117600 | turquoise    |
| ENSMUSG00000020122  | Egfr          | 13649  | red          |
| ENSMUSG00000023908  | Pkmyt1        | 268930 | magenta      |
| ENSMUSG00000023909  | Paqr4         | 76498  | blue         |
| ENSMUSG00000020124  | NA            | NA     | blue         |
| ENSMUSG00000020128  | Vps54         | 245944 | green        |
| ENSMUSG00000097987  | NA            | NA     | turquoise    |
| ENSMUSG000000106864 | Gtf3c2        | 71752  | blue         |
| ENSMUSG00000097989  | NA            | NA     | turquoise    |
| ENSMUSG00000098404  | NA            | NA     | turquoise    |
| ENSMUSG000000103085 | NA            | NA     | turquoise    |
| ENSMUSG00000038332  | Sesn1         | 140742 | turquoise    |
| ENSMUSG000000103088 | Pcdhgb6       | 93703  | turquoise    |
| ENSMUSG00000045062  | Pcdhb7        | 93878  | yellow       |
| ENSMUSG00000083743  | NA            | NA     | pink         |
| ENSMUSG00000038335  | Tsr1          | 104662 | brown        |
| ENSMUSG00000083745  | NA            | NA     | blue         |
| ENSMUSG00000073233  | NA            | NA     | red          |
| ENSMUSG00000016940  | Kctd2         | 70382  | turquoise    |
| ENSMUSG00000073236  | 2500004C02Rik | 72326  | blue         |
| ENSMUSG00000013160  | Atp6v0d1      | 11972  | turquoise    |
| ENSMUSG00000016946  | Kctd5         | 69259  | turquoise    |
| ENSMUSG00000034601  | 2700049A03Rik | 76967  | red          |
| ENSMUSG00000034602  | Mon2          | 67074  | blue         |
| ENSMUSG00000098175  | NA            | NA     | turquoise    |
| ENSMUSG00000059540  | Tcea2         | 21400  | turquoise    |
| ENSMUSG00000066270  | NA            | NA     | turquoise    |
| ENSMUSG00000094441  | NA            | NA     | yellow       |
| ENSMUSG00000044881  | NA            | NA     | greenyellow  |
| ENSMUSG00000066278  | Vps37b        | 330192 | red          |
| ENSMUSG00000049038  | Mterf2        | 74238  | turquoise    |
| ENSMUSG00000027641  | Rbl1          | 19650  | magenta      |
| ENSMUSG00000027642  | Rpn2          | 20014  | turquoise    |
| ENSMUSG00000034371  | Tkfc          | 225913 | green        |

|                    |               |    |        |              |
|--------------------|---------------|----|--------|--------------|
| ENSMUSG00000017132 | Cyth1         |    | 19157  | turquoise    |
| ENSMUSG00000027646 | Src           |    | 20779  | yellow       |
| ENSMUSG00000045302 | Preb          |    | 50907  | brown        |
| ENSMUSG00000052031 | Tagap1        |    | 380608 | blue         |
| ENSMUSG00000055817 | Mta3          |    | 116871 | turquoise    |
| ENSMUSG00000034377 | Tulp4         |    | 68842  | pink         |
| ENSMUSG00000027649 | Ctnnbl1       |    | 66642  | red          |
| ENSMUSG00000052033 | Pfdn4         |    | 109054 | red          |
| ENSMUSG00000034379 | Wdr5b         |    | 69544  | turquoise    |
| ENSMUSG00000023912 | Slc25a27      |    | 74011  | blue         |
| ENSMUSG00000023913 | Pla2g7        |    | 27226  | purple       |
| ENSMUSG00000030641 | Ddias         |    | 74041  | cyan         |
| ENSMUSG00000002475 | Abhd3         |    | 106861 | purple       |
| ENSMUSG00000023915 | Tnfrsf21      |    | 94185  | turquoise    |
| ENSMUSG00000020130 | Tbc1d15       |    | 66687  | green        |
| ENSMUSG00000030643 | Rab30         |    | 75985  | turquoise    |
| ENSMUSG00000002477 | Snrpd1        |    | 20641  | black        |
| ENSMUSG00000020132 | Rab21         |    | 216344 | turquoise    |
| ENSMUSG00000020133 | 2310011J03Rik |    | 66374  | turquoise    |
| ENSMUSG00000023919 | NA            | NA |        | red          |
| ENSMUSG00000020134 | Peli1         |    | 67245  | midnightblue |
| ENSMUSG00000030647 | Ndufc2        |    | 68197  | midnightblue |
| ENSMUSG00000020135 | Apc2          |    | 23805  | yellow       |
| ENSMUSG00000030649 | Anapc15       |    | 75430  | red          |
| ENSMUSG00000020137 | Thap2         |    | 66816  | turquoise    |
| ENSMUSG00000106874 | NA            | NA |        | turquoise    |
| ENSMUSG00000097999 | NA            | NA |        | turquoise    |
| ENSMUSG00000103094 | NA            | NA |        | turquoise    |
| ENSMUSG00000083750 | NA            | NA |        | yellow       |
| ENSMUSG00000038342 | Mlxip         |    | 208104 | turquoise    |
| ENSMUSG00000048856 | Slc25a47      |    | 104910 | turquoise    |
| ENSMUSG00000045071 | E130308A19Rik |    | 230259 | brown        |
| ENSMUSG00000038344 | Txlng         |    | 353170 | blue         |
| ENSMUSG00000083754 | NA            | NA |        | brown        |
| ENSMUSG00000038346 | Zfp384        |    | 269800 | brown        |
| ENSMUSG00000083757 | NA            | NA |        | cyan         |
| ENSMUSG00000038349 | Plcl1         |    | 227120 | yellow       |
| ENSMUSG00000056004 | 9330182L06Rik |    | 231014 | yellow       |
| ENSMUSG00000045078 | Rnf216        |    | 108086 | green        |
| ENSMUSG00000034610 | Zcchc11       |    | 230594 | turquoise    |
| ENSMUSG00000051851 | NA            | NA |        | turquoise    |
| ENSMUSG00000006442 | Srm           |    | 20810  | red          |
| ENSMUSG00000051853 | Arf3          |    | 11842  | brown        |
| ENSMUSG00000041341 | Atg2b         |    | 76559  | turquoise    |
| ENSMUSG00000034613 | Ppm1h         |    | 319468 | turquoise    |
| ENSMUSG00000024101 | Wash1         |    | 68767  | blue         |
| ENSMUSG00000034614 | Pik3ip1       |    | 216505 | blue         |
| ENSMUSG00000051855 | Mest          |    | 17294  | blue         |
| ENSMUSG00000034617 | Mtrr          |    | 210009 | blue         |
| ENSMUSG00000024104 | Fam21         |    | 28006  | turquoise    |
| ENSMUSG00000041346 | Wrap53        |    | 216853 | blue         |
| ENSMUSG00000098180 | NA            | NA |        | blue         |
| ENSMUSG00000024109 | Nrxn1         |    | 18189  | purple       |
| ENSMUSG00000098183 | NA            | NA |        | turquoise    |

|                    |               |        |              |
|--------------------|---------------|--------|--------------|
| ENSMUSG00000098187 | NA            | NA     | turquoise    |
| ENSMUSG00000002718 | Cse1l         | 110750 | salmon       |
| ENSMUSG00000059552 | Trp53         | 22059  | green        |
| ENSMUSG00000107066 | NA            | NA     | cyan         |
| ENSMUSG00000059554 | Ccdc28a       | 215814 | turquoise    |
| ENSMUSG00000103332 | Pcdhga2       | 93710  | yellow       |
| ENSMUSG00000009995 | Taz           | 66826  | turquoise    |
| ENSMUSG00000049047 | Armcx3        | 71703  | turquoise    |
| ENSMUSG00000027650 | Tti1          | 75425  | salmon       |
| ENSMUSG00000027651 | Rprd1b        | 70470  | blue         |
| ENSMUSG00000027652 | Ralgapb       | 228850 | turquoise    |
| ENSMUSG00000044894 | Uqcrq         | 22272  | midnightblue |
| ENSMUSG00000027655 | Dhx35         | 71715  | blue         |
| ENSMUSG00000052040 | Klf13         | 50794  | black        |
| ENSMUSG00000017144 | Rnd3          | 74194  | brown        |
| ENSMUSG00000062554 | NA            | NA     | turquoise    |
| ENSMUSG00000017146 | Brca1         | 12189  | salmon       |
| ENSMUSG00000045316 | Fahd1         | 68636  | brown        |
| ENSMUSG00000023921 | Mut           | 17850  | turquoise    |
| ENSMUSG00000023923 | Tbc1d5        | 72238  | turquoise    |
| ENSMUSG00000030652 | Coq7          | 12850  | brown        |
| ENSMUSG00000030654 | Arl6ip1       | 54208  | turquoise    |
| ENSMUSG00000002486 | Tchp          | 77832  | magenta      |
| ENSMUSG00000023927 | Satb1         | 20230  | brown        |
| ENSMUSG00000020142 | Slc1a4        | 55963  | yellow       |
| ENSMUSG00000030655 | Smg1          | 233789 | turquoise    |
| ENSMUSG00000030657 | Xylt1         | 233781 | yellow       |
| ENSMUSG00000030659 | Nucb2         | 53322  | turquoise    |
| ENSMUSG00000013419 | Zfp651        | 270210 | turquoise    |
| ENSMUSG00000020149 | Rab1a         | 19324  | midnightblue |
| ENSMUSG00000087497 | 2810001G20Rik | 66456  | grey60       |
| ENSMUSG00000038351 | Sgsm2         | 97761  | turquoise    |
| ENSMUSG00000038352 | Arl5c         | 217151 | turquoise    |
| ENSMUSG00000083761 | NA            | NA     | turquoise    |
| ENSMUSG00000083764 | NA            | NA     | lightcyan    |
| ENSMUSG00000056014 | A430033K04Rik | 243308 | brown        |
| ENSMUSG00000034620 | NA            | NA     | turquoise    |
| ENSMUSG00000034621 | Gpatch8       | 237943 | turquoise    |
| ENSMUSG00000056019 | NA            | NA     | turquoise    |
| ENSMUSG00000051864 | Tbc1d22a      | 223754 | turquoise    |
| ENSMUSG00000041351 | Rap1gap       | 110351 | yellow       |
| ENSMUSG00000006456 | Rbm14         | 56275  | red          |
| ENSMUSG00000041353 | Tmem29        | 382245 | turquoise    |
| ENSMUSG00000041354 | Rgl2          | 19732  | pink         |
| ENSMUSG00000041355 | Ssr2          | 66256  | blue         |
| ENSMUSG00000024118 | 1600002H07Rik | 72016  | red          |
| ENSMUSG00000098192 | NA            | NA     | greenyellow  |
| ENSMUSG00000098194 | NA            | NA     | yellow       |
| ENSMUSG00000002728 | Naa20         | 67877  | green        |
| ENSMUSG00000098198 | NA            | NA     | blue         |
| ENSMUSG00000059565 | NA            | NA     | blue         |
| ENSMUSG00000094463 | NA            | NA     | turquoise    |
| ENSMUSG00000077222 | NA            | NA     | blue         |
| ENSMUSG00000027660 | Skil          | 20482  | red          |

|                    |               |        |           |
|--------------------|---------------|--------|-----------|
| ENSMUSG00000027661 | Slc2a10       | 170441 | blue      |
| ENSMUSG00000034390 | Cmip          | 74440  | turquoise |
| ENSMUSG00000027663 | Zmat3         | 22401  | blue      |
| ENSMUSG00000027665 | Pik3ca        | 18706  | turquoise |
| ENSMUSG00000055835 | Zfp1          | 22640  | turquoise |
| ENSMUSG00000027667 | Zfp639        | 67778  | red       |
| ENSMUSG00000027668 | Mfn1          | 67414  | yellow    |
| ENSMUSG00000090733 | Rps27         | 57294  | black     |
| ENSMUSG00000027669 | Gnb4          | 14696  | brown     |
| ENSMUSG00000055839 | Tceb2         | 67673  | turquoise |
| ENSMUSG00000045327 | 6330549D23Rik | 229613 | brown     |
| ENSMUSG00000090737 | NA            | NA     | turquoise |
| ENSMUSG00000045328 | Cenpe         | 229841 | magenta   |
| ENSMUSG00000052056 | Zfp217        | 228913 | pink      |
| ENSMUSG00000023932 | Cdc5l         | 71702  | blue      |
| ENSMUSG00000030660 | Pik3c2a       | 18704  | brown     |
| ENSMUSG00000030662 | Ipo5          | 70572  | black     |
| ENSMUSG00000020150 | Gamt          | 14431  | grey60    |
| ENSMUSG00000030663 | 1110004F10Rik | 56372  | green     |
| ENSMUSG00000002496 | Tsc2          | 22084  | brown     |
| ENSMUSG00000020152 | Actr2         | 66713  | turquoise |
| ENSMUSG00000020153 | Ndufs7        | 75406  | yellow    |
| ENSMUSG00000023939 | Mrpl14        | 68463  | green     |
| ENSMUSG00000020156 | Mum1          | 68114  | salmon    |
| ENSMUSG00000106895 | NA            | NA     | brown     |
| ENSMUSG00000106896 | NA            | NA     | turquoise |
| ENSMUSG00000107310 | NA            | NA     | turquoise |
| ENSMUSG00000098439 | NA            | NA     | turquoise |
| ENSMUSG00000048874 | Phf3          | 213109 | turquoise |
| ENSMUSG00000083772 | NA            | NA     | turquoise |
| ENSMUSG00000045092 | S1pr1         | 13609  | purple    |
| ENSMUSG00000083773 | NA            | NA     | turquoise |
| ENSMUSG00000048878 | Hexim1        | 192231 | turquoise |
| ENSMUSG00000038365 | Fbxo25        | 66822  | brown     |
| ENSMUSG00000083774 | NA            | NA     | green     |
| ENSMUSG00000038366 | Lasp1         | 16796  | brown     |
| ENSMUSG00000045095 | Magi1         | 14924  | blue      |
| ENSMUSG00000038368 | Focad         | 230393 | cyan      |
| ENSMUSG00000038369 | Ncoa6         | 56406  | brown     |
| ENSMUSG00000045098 | Suv420h1      | 225888 | turquoise |
| ENSMUSG00000066538 | NA            | NA     | turquoise |
| ENSMUSG00000027900 | Dram2         | 67171  | turquoise |
| ENSMUSG00000094708 | NA            | NA     | turquoise |
| ENSMUSG00000006463 | Zdhc24        | 70605  | yellow    |
| ENSMUSG00000041360 | Pum3          | 52874  | green     |
| ENSMUSG00000006464 | Bbs1          | 52028  | turquoise |
| ENSMUSG00000024120 | Lrpprc        | 72416  | green     |
| ENSMUSG00000027905 | Ddx20         | 53975  | blue      |
| ENSMUSG00000024121 | Atp6v0c       | 11984  | purple    |
| ENSMUSG00000024122 | Pdpc1         | 18607  | turquoise |
| ENSMUSG00000034636 | Zyg11b        | 414872 | blue      |
| ENSMUSG00000024127 | Prepl         | 213760 | green     |
| ENSMUSG00000002731 | Prkra         | 23992  | blue      |
| ENSMUSG00000002732 | Fkbp7         | 14231  | turquoise |



|                    |           |    |        |              |
|--------------------|-----------|----|--------|--------------|
| ENSMUSG0000002733  | Plekha3   |    | 83435  | brown        |
| ENSMUSG00000030905 | Crym      |    | 12971  | yellow       |
| ENSMUSG00000027671 | Actl6a    |    | 56456  | blue         |
| ENSMUSG00000103355 | NA        | NA |        | yellow       |
| ENSMUSG00000027673 | Ndufb5    |    | 66046  | midnightblue |
| ENSMUSG00000038602 | Slc35f1   |    | 215085 | turquoise    |
| ENSMUSG00000027676 | Ccdc39    |    | 51938  | yellow       |
| ENSMUSG00000038604 | Fam65a    |    | 75687  | turquoise    |
| ENSMUSG00000027677 | Ttc14     |    | 67120  | brown        |
| ENSMUSG00000045333 | Zfp423    |    | 94187  | turquoise    |
| ENSMUSG00000038605 | Samd10    |    | 229011 | grey60       |
| ENSMUSG00000027678 | Ncoa3     |    | 17979  | brown        |
| ENSMUSG00000052062 | Pard3b    |    | 72823  | turquoise    |
| ENSMUSG00000027679 | Dnajc19   |    | 67713  | turquoise    |
| ENSMUSG00000038607 | Gng10     |    | 14700  | green        |
| ENSMUSG00000023940 | Sgol1     |    | 72415  | magenta      |
| ENSMUSG00000023942 | Slc29a1   |    | 63959  | blue         |
| ENSMUSG00000030671 | NA        | NA |        | red          |
| ENSMUSG00000023944 | Hsp90ab1  |    | 15516  | black        |
| ENSMUSG00000030672 | Mylpf     |    | 17907  | turquoise    |
| ENSMUSG00000020160 | Meis1     |    | 17268  | turquoise    |
| ENSMUSG00000006705 | Pknox1    |    | 18771  | red          |
| ENSMUSG00000020163 | Uqcr11    |    | 66594  | brown        |
| ENSMUSG00000030677 | Kif22     |    | 110033 | magenta      |
| ENSMUSG00000030678 | Maz       |    | 17188  | red          |
| ENSMUSG00000020166 | Cnot2     |    | 72068  | red          |
| ENSMUSG00000041607 | Mbp       |    | 17196  | turquoise    |
| ENSMUSG00000020167 | Tcf3      |    | 21423  | red          |
| ENSMUSG00000041609 | Ccdc64    |    | 75665  | turquoise    |
| ENSMUSG00000059810 | Rgs3      |    | 50780  | brown        |
| ENSMUSG00000059811 | Atl2      |    | 56298  | greenyellow  |
| ENSMUSG00000038371 | Sbf2      |    | 319934 | black        |
| ENSMUSG00000083780 | NA        | NA |        | tan          |
| ENSMUSG00000049300 | Prmt6     |    | 99890  | blue         |
| ENSMUSG00000107327 | NA        | NA |        | yellow       |
| ENSMUSG00000038374 | Rbm8a     |    | 60365  | black        |
| ENSMUSG00000038375 | Trp53inp2 |    | 68728  | turquoise    |
| ENSMUSG00000066543 | NA        | NA |        | pink         |
| ENSMUSG00000049305 | Ccdc71    |    | 72454  | turquoise    |
| ENSMUSG00000038379 | Ttk       |    | 22137  | magenta      |
| ENSMUSG00000084203 | NA        | NA |        | turquoise    |
| ENSMUSG00000016984 | Etaa1     |    | 68145  | turquoise    |
| ENSMUSG00000006471 | Ndor1     |    | 78797  | pink         |
| ENSMUSG00000034640 | Tiparp    |    | 99929  | turquoise    |
| ENSMUSG00000024130 | Abca3     |    | 27410  | brown        |
| ENSMUSG00000006476 | Nsmf      |    | 56876  | yellow       |
| ENSMUSG00000024132 | Eci1      |    | 13177  | turquoise    |
| ENSMUSG00000017404 | Rpl19     |    | 19921  | black        |
| ENSMUSG00000017405 | Nek8      |    | 140859 | turquoise    |
| ENSMUSG00000034647 | Ankrd12   |    | 106585 | turquoise    |
| ENSMUSG00000041375 | Ccdc9     |    | 243846 | turquoise    |
| ENSMUSG00000024135 | Srbd1     |    | 78586  | red          |
| ENSMUSG00000034648 | Lrn1      |    | 16979  | blue         |
| ENSMUSG00000024137 | E4f1      |    | 13560  | turquoise    |

|                    |          |    |        |           |
|--------------------|----------|----|--------|-----------|
| ENSMUSG0000002741  | Ykt6     |    | 56418  | blue      |
| ENSMUSG00000020400 | Tnip1    |    | 57783  | turquoise |
| ENSMUSG00000020402 | Vdac1    |    | 22333  | turquoise |
| ENSMUSG00000107092 | NA       | NA |        | red       |
| ENSMUSG00000002748 | Baz1b    |    | 22385  | black     |
| ENSMUSG00000107096 | NA       | NA |        | yellow    |
| ENSMUSG00000020407 | Upp1     |    | 22271  | turquoise |
| ENSMUSG00000020409 | Slu7     |    | 193116 | brown     |
| ENSMUSG00000059585 | NA       | NA |        | lightcyan |
| ENSMUSG00000059586 | Nsmce2   |    | 68501  | red       |
| ENSMUSG00000094483 | Purb     |    | 19291  | green     |
| ENSMUSG00000049076 | Acap2    |    | 78618  | turquoise |
| ENSMUSG00000027680 | Fxr1     |    | 14359  | blue      |
| ENSMUSG00000055850 | Rnf181   |    | 66510  | turquoise |
| ENSMUSG00000038611 | Phrf1    |    | 101471 | red       |
| ENSMUSG00000062580 | NA       | NA |        | green     |
| ENSMUSG00000038612 | Mcl1     |    | 17210  | black     |
| ENSMUSG00000028101 | Pias3    |    | 229615 | brown     |
| ENSMUSG00000038615 | Nfe2l1   |    | 18023  | turquoise |
| ENSMUSG00000028102 | Pex11b   |    | 18632  | brown     |
| ENSMUSG00000017176 | Nt5c3b   |    | 68106  | turquoise |
| ENSMUSG00000028104 | Polr3gl  |    | 69870  | turquoise |
| ENSMUSG00000080242 | NA       | NA |        | purple    |
| ENSMUSG00000028106 | Rprd2    |    | 75137  | turquoise |
| ENSMUSG00000038619 | Ensa     |    | 56205  | blue      |
| ENSMUSG00000062588 | NA       | NA |        | red       |
| ENSMUSG00000023951 | Vegfa    |    | 22339  | blue      |
| ENSMUSG00000028107 | Tars2    |    | 71807  | blue      |
| ENSMUSG00000023952 | Gtpbp2   |    | 56055  | turquoise |
| ENSMUSG00000030681 | Mvp      |    | 78388  | pink      |
| ENSMUSG00000030682 | Cdpt     |    | 52858  | turquoise |
| ENSMUSG00000020170 | Frs2     |    | 327826 | brown     |
| ENSMUSG00000030683 | Sez6l2   |    | 233878 | turquoise |
| ENSMUSG00000006715 | Gmnn     |    | 57441  | magenta   |
| ENSMUSG00000020171 | Yeats4   |    | 64050  | black     |
| ENSMUSG00000030685 | Kctd13   |    | 233877 | blue      |
| ENSMUSG00000006717 | Acot13   |    | 66834  | blue      |
| ENSMUSG00000020175 | Rab36    |    | 76877  | turquoise |
| ENSMUSG00000030689 | Ino80e   |    | 233875 | green     |
| ENSMUSG00000041617 | Ccdc74a  |    | 72315  | brown     |
| ENSMUSG00000031104 | Rab33a   |    | 19337  | turquoise |
| ENSMUSG00000031105 | Slc25a14 |    | 20523  | yellow    |
| ENSMUSG00000031109 | Enox2    |    | 209224 | blue      |
| ENSMUSG00000107331 | NA       | NA |        | yellow    |
| ENSMUSG00000107333 | NA       | NA |        | blue      |
| ENSMUSG00000059820 | AU019823 |    | 270156 | blue      |
| ENSMUSG00000048895 | Cdk5r1   |    | 12569  | green     |
| ENSMUSG00000107336 | NA       | NA |        | pink      |
| ENSMUSG00000038383 | Pigu     |    | 228812 | turquoise |
| ENSMUSG00000066551 | Hmgb1    |    | 15289  | black     |
| ENSMUSG00000038384 | Setd1b   |    | 208043 | blue      |
| ENSMUSG00000048897 | Zfp710   |    | 209225 | turquoise |
| ENSMUSG00000059824 | Dbp      |    | 13170  | purple    |
| ENSMUSG00000083793 | NA       | NA |        | lightcyan |

|                    |               |        |              |
|--------------------|---------------|--------|--------------|
| ENSMUSG00000066553 | NA            | NA     | turquoise    |
| ENSMUSG00000049313 | NA            | NA     | yellow       |
| ENSMUSG00000066554 | NA            | NA     | blue         |
| ENSMUSG00000038387 | Rras          | 20130  | greenyellow  |
| ENSMUSG00000083796 | NA            | NA     | yellow       |
| ENSMUSG00000094724 | Rnaset2b      | 68195  | blue         |
| ENSMUSG00000084211 | NA            | NA     | turquoise    |
| ENSMUSG00000038388 | Mpp6          | 56524  | brown        |
| ENSMUSG00000084215 | NA            | NA     | turquoise    |
| ENSMUSG00000084216 | NA            | NA     | turquoise    |
| ENSMUSG00000034653 | Ythdc2        | 240255 | turquoise    |
| ENSMUSG00000024140 | Epas1         | 13819  | red          |
| ENSMUSG00000062822 | 4833420G17Rik | 67392  | turquoise    |
| ENSMUSG00000024142 | Mlst8         | 56716  | blue         |
| ENSMUSG00000052310 | Slc39a1       | 30791  | turquoise    |
| ENSMUSG00000024143 | Rhoq          | 104215 | yellow       |
| ENSMUSG00000034656 | Cacna1a       | 12286  | turquoise    |
| ENSMUSG00000062825 | Actg1         | 11465  | green        |
| ENSMUSG00000024145 | Pigf          | 18701  | turquoise    |
| ENSMUSG00000034659 | Tmem109       | 68539  | turquoise    |
| ENSMUSG00000024146 | Cript         | 56724  | blue         |
| ENSMUSG00000017418 | NA            | NA     | brown        |
| ENSMUSG00000030922 | Lym1          | 73919  | blue         |
| ENSMUSG00000030924 | 2610020H08Rik | 434234 | magenta      |
| ENSMUSG00000020412 | Ascc2         | 75452  | blue         |
| ENSMUSG00000020413 | Hus1          | 15574  | brown        |
| ENSMUSG00000020415 | Pttg1         | 30939  | midnightblue |
| ENSMUSG00000030929 | Eri2          | 71151  | magenta      |
| ENSMUSG00000049086 | Bmyc          | 107771 | green        |
| ENSMUSG00000094497 | NA            | NA     | pink         |
| ENSMUSG00000027692 | Tnik          | 665113 | purple       |
| ENSMUSG00000055862 | Izumo4        | 71564  | turquoise    |
| ENSMUSG00000062590 | Armc9         | 78795  | turquoise    |
| ENSMUSG00000027694 | NA            | NA     | blue         |
| ENSMUSG00000062591 | Tubb4a        | 22153  | blue         |
| ENSMUSG00000038622 | Med30         | 69790  | red          |
| ENSMUSG00000055866 | Per2          | 18627  | turquoise    |
| ENSMUSG00000027699 | Ect2          | 13605  | magenta      |
| ENSMUSG00000028114 | Mettl14       | 210529 | red          |
| ENSMUSG00000017188 | Coa3          | 52469  | turquoise    |
| ENSMUSG00000038628 | Polr3k        | 67005  | blue         |
| ENSMUSG00000023960 | Enpp5         | 83965  | turquoise    |
| ENSMUSG00000023961 | Enpp4         | 224794 | turquoise    |
| ENSMUSG00000006720 | Zfp184        | 193452 | cyan         |
| ENSMUSG00000023963 | Cyp39a1       | 56050  | magenta      |
| ENSMUSG00000030691 | Fchsd2        | 207278 | turquoise    |
| ENSMUSG00000063015 | Ccni          | 12453  | black        |
| ENSMUSG00000023965 | NA            | NA     | turquoise    |
| ENSMUSG00000020180 | NA            | NA     | red          |
| ENSMUSG00000023966 | Rsph9         | 75564  | brown        |
| ENSMUSG00000023967 | Mrps18a       | 68565  | blue         |
| ENSMUSG00000030695 | Aldoa         | 11674  | red          |
| ENSMUSG00000063019 | Manbal        | 69161  | turquoise    |
| ENSMUSG00000041623 | D11Wsu47e     | 276852 | turquoise    |

|                    |               |        |             |
|--------------------|---------------|--------|-------------|
| ENSMUSG00000006728 | NA            | NA     | black       |
| ENSMUSG00000020184 | Mdm2          | 17246  | blue        |
| ENSMUSG00000030697 | Ppp4c         | 56420  | red         |
| ENSMUSG00000020185 | E2f7          | 52679  | magenta     |
| ENSMUSG00000020186 | Csrp2         | 13008  | lightcyan   |
| ENSMUSG00000041629 | Fam104a       | 28081  | turquoise   |
| ENSMUSG00000020189 | Osbp18        | 237542 | blue        |
| ENSMUSG00000031119 | Gpc4          | 14735  | blue        |
| ENSMUSG00000059830 | NA            | NA     | salmon      |
| ENSMUSG00000038393 | Txnip         | 56338  | red         |
| ENSMUSG00000049321 | Zfp2          | 22678  | turquoise   |
| ENSMUSG00000059834 | Sclt1         | 67161  | turquoise   |
| ENSMUSG00000059835 | NA            | NA     | black       |
| ENSMUSG00000056050 | NA            | NA     | blue        |
| ENSMUSG00000049323 | Smcr8         | 237782 | pink        |
| ENSMUSG00000073293 | Nudt10        | 102954 | yellow      |
| ENSMUSG00000084221 | NA            | NA     | red         |
| ENSMUSG00000038398 | Upf3a         | 67031  | magenta     |
| ENSMUSG00000059839 | Zfp874b       | 408067 | yellow      |
| ENSMUSG00000073295 | Nudt11        | 58242  | turquoise   |
| ENSMUSG00000084223 | NA            | NA     | turquoise   |
| ENSMUSG00000049327 | Setd8         | 67956  | blue        |
| ENSMUSG00000066568 | Lsm14a        | 67070  | magenta     |
| ENSMUSG00000084224 | NA            | NA     | pink        |
| ENSMUSG00000027933 | Ints3         | 229543 | green       |
| ENSMUSG00000017421 | Zfp207        | 22680  | greenyellow |
| ENSMUSG00000006494 | Pdk1          | 228026 | blue        |
| ENSMUSG00000024150 | Mcf2          | 193813 | blue        |
| ENSMUSG00000034663 | Bmp2k         | 140780 | yellow      |
| ENSMUSG00000024151 | Msh2          | 17685  | red         |
| ENSMUSG00000027936 | Crtc2         | 74343  | turquoise   |
| ENSMUSG00000027937 | Jtb           | 23922  | yellow      |
| ENSMUSG00000006498 | Ptbp1         | 19205  | black       |
| ENSMUSG00000034667 | Xpot          | 73192  | turquoise   |
| ENSMUSG00000017428 | Psm11         | 69077  | green       |
| ENSMUSG00000024158 | Hagh          | 14651  | turquoise   |
| ENSMUSG00000002763 | Pex6          | 224824 | turquoise   |
| ENSMUSG00000020420 | NA            | NA     | pink        |
| ENSMUSG00000030934 | Oat           | 18242  | grey60      |
| ENSMUSG00000002767 | Mrpl2         | 27398  | blue        |
| ENSMUSG00000020422 | Tns3          | 319939 | turquoise   |
| ENSMUSG00000002768 | Mea1          | 17256  | purple      |
| ENSMUSG00000020423 | Btg2          | 12227  | red         |
| ENSMUSG00000049090 | Zadh2         | 225791 | turquoise   |
| ENSMUSG00000049091 | NA            | NA     | turquoise   |
| ENSMUSG00000049092 | Gpr137c       | 70713  | turquoise   |
| ENSMUSG00000098702 | 1500015A07Rik | 68982  | turquoise   |
| ENSMUSG00000066800 | Rnasel        | 24014  | blue        |
| ENSMUSG00000038633 | Degs1         | 13244  | greenyellow |
| ENSMUSG00000028121 | Bcar3         | 29815  | turquoise   |
| ENSMUSG00000038637 | Lrrc56        | 70552  | blue        |
| ENSMUSG00000028124 | NA            | NA     | turquoise   |
| ENSMUSG00000028126 | Pip5k1a       | 18720  | brown       |
| ENSMUSG00000066807 | NA            | NA     | blue        |

|                    |               |        |             |
|--------------------|---------------|--------|-------------|
| ENSMUSG00000023971 | Rrp36         | 224823 | turquoise   |
| ENSMUSG00000028127 | Abcd3         | 19299  | turquoise   |
| ENSMUSG00000023972 | Ptk7          | 71461  | pink        |
| ENSMUSG00000066809 | NA            | NA     | black       |
| ENSMUSG00000028128 | F3            | 14066  | red         |
| ENSMUSG00000023973 | Cnpy3         | 72029  | blue        |
| ENSMUSG00000006732 | Mettl1        | 17299  | blue        |
| ENSMUSG00000080268 | Brms1         | 107392 | green       |
| ENSMUSG00000034902 | Pip5k1c       | 18717  | turquoise   |
| ENSMUSG00000020190 | Mknk2         | 17347  | blue        |
| ENSMUSG00000023977 | Ubr2          | 224826 | brown       |
| ENSMUSG00000041632 | Mrps27        | 218506 | green       |
| ENSMUSG00000006736 | Tspan31       | 67125  | brown       |
| ENSMUSG00000041633 | Kctd12b       | 207474 | pink        |
| ENSMUSG00000013465 | Nelfb         | 58202  | blue        |
| ENSMUSG00000034906 | Ncaph         | 215387 | magenta     |
| ENSMUSG00000034908 | Sidt2         | 214597 | brown       |
| ENSMUSG00000020196 | Cabin1        | 104248 | brown       |
| ENSMUSG00000020198 | Ap3d1         | 11776  | turquoise   |
| ENSMUSG00000041638 | Gcn11l        | 231659 | turquoise   |
| ENSMUSG00000066571 | 4931406P16Rik | 233103 | greenyellow |
| ENSMUSG00000107359 | NA            | NA     | cyan        |
| ENSMUSG00000084230 | NA            | NA     | blue        |
| ENSMUSG00000103621 | NA            | NA     | greenyellow |
| ENSMUSG00000027940 | Tpm3          | 59069  | green       |
| ENSMUSG00000027942 | 1700094D03Rik | 73545  | turquoise   |
| ENSMUSG00000084235 | NA            | NA     | yellow      |
| ENSMUSG00000049339 | Fam134a       | 227298 | turquoise   |
| ENSMUSG00000027944 | Hax1          | 23897  | blue        |
| ENSMUSG00000034673 | Pbx2          | 18515  | turquoise   |
| ENSMUSG00000024160 | Spsb3         | 79043  | brown       |
| ENSMUSG00000034674 | Tdg           | 21665  | turquoise   |
| ENSMUSG00000034675 | Dbn1          | 56320  | red         |
| ENSMUSG00000024163 | Mapk8ip3      | 30957  | brown       |
| ENSMUSG00000052331 | Ankrd44       | 329154 | brown       |
| ENSMUSG00000024165 | Hn1l          | 52009  | purple      |
| ENSMUSG00000062846 | NA            | NA     | red         |
| ENSMUSG00000045608 | NA            | NA     | yellow      |
| ENSMUSG00000024169 | Ift140        | 106633 | blue        |
| ENSMUSG00000045609 | NA            | NA     | turquoise   |
| ENSMUSG00000052337 | Immt          | 76614  | red         |
| ENSMUSG00000013701 | Timm23        | 53600  | blue        |
| ENSMUSG00000030942 | Thumpd1       | 233802 | red         |
| ENSMUSG00000020430 | Pes1          | 64934  | black       |
| ENSMUSG00000020432 | Tcn2          | 21452  | purple      |
| ENSMUSG00000030946 | Lhpp          | 76429  | turquoise   |
| ENSMUSG00000002778 | Kdelr1        | 68137  | yellow      |
| ENSMUSG00000020439 | Smtn          | 29856  | magenta     |
| ENSMUSG00000098713 | NA            | NA     | tan         |
| ENSMUSG00000038644 | Pold1         | 18971  | black       |
| ENSMUSG00000073542 | Cep76         | 225659 | salmon      |
| ENSMUSG00000038646 | Fam103a1      | 67148  | red         |
| ENSMUSG00000028134 | Ptbp2         | 56195  | blue        |
| ENSMUSG00000038648 | NA            | NA     | blue        |

|                    |               |        |              |
|--------------------|---------------|--------|--------------|
| ENSMUSG00000023980 | Taf8          | 63856  | green        |
| ENSMUSG00000028136 | Snx27         | 76742  | blue         |
| ENSMUSG00000006740 | Kif5b         | 16573  | greenyellow  |
| ENSMUSG00000028137 | Celf3         | 78784  | green        |
| ENSMUSG00000056305 | Usp39         | 28035  | red          |
| ENSMUSG00000028138 | Adh5          | 11532  | green        |
| ENSMUSG00000034910 | NA            | NA     | turquoise    |
| ENSMUSG00000034912 | NA            | NA     | yellow       |
| ENSMUSG00000024400 | Wdr33         | 74320  | pink         |
| ENSMUSG00000041642 | Kif21b        | 16565  | brown        |
| ENSMUSG00000023988 | Bysl          | 53414  | turquoise    |
| ENSMUSG00000024404 | Riok3         | 66878  | blue         |
| ENSMUSG00000041645 | Ddx24         | 27225  | brown        |
| ENSMUSG00000031134 | Rbmx          | 19655  | blue         |
| ENSMUSG00000031137 | Fgf13         | 14168  | blue         |
| ENSMUSG00000107362 | NA            | NA     | brown        |
| ENSMUSG00000059851 | Suv420h2      | 232811 | turquoise    |
| ENSMUSG00000107369 | NA            | NA     | red          |
| ENSMUSG00000056073 | Grik2         | 14806  | turquoise    |
| ENSMUSG00000027950 | Chrn2         | 11444  | yellow       |
| ENSMUSG00000027951 | Adar          | 56417  | brown        |
| ENSMUSG00000056076 | Eif3b         | 27979  | red          |
| ENSMUSG00000027952 | Pmvk          | 68603  | turquoise    |
| ENSMUSG00000034681 | Rnps1         | 19826  | black        |
| ENSMUSG00000027953 | Slc50a1       | 19729  | turquoise    |
| ENSMUSG00000024170 | Telo2         | 71718  | brown        |
| ENSMUSG00000084249 | NA            | NA     | turquoise    |
| ENSMUSG00000027956 | Tmem144       | 70652  | yellow       |
| ENSMUSG00000027957 | Slc35a3       | 229782 | yellow       |
| ENSMUSG00000024174 | Pot1b         | 72836  | grey60       |
| ENSMUSG00000027959 | Sass6         | 72776  | turquoise    |
| ENSMUSG00000024176 | Sox8          | 20681  | blue         |
| ENSMUSG00000024177 | Nme4          | 56520  | black        |
| ENSMUSG00000070000 | Fcho1         | 74015  | blue         |
| ENSMUSG00000035104 | Eva1a         | 232146 | purple       |
| ENSMUSG00000002781 | Tmem143       | 70209  | turquoise    |
| ENSMUSG00000070002 | Eil           | 13716  | blue         |
| ENSMUSG00000035107 | Dcbld2        | 73379  | turquoise    |
| ENSMUSG00000070003 | Ssbp4         | 76900  | midnightblue |
| ENSMUSG00000080518 | NA            | NA     | pink         |
| ENSMUSG00000020440 | Arf5          | 11844  | green        |
| ENSMUSG00000003200 | Sh3gl1        | 20405  | green        |
| ENSMUSG00000020441 | 2310033P09Rik | 67862  | blue         |
| ENSMUSG00000030956 | Fam53b        | 77938  | blue         |
| ENSMUSG00000020444 | Guk1          | 14923  | blue         |
| ENSMUSG00000020448 | Rnf185        | 193670 | turquoise    |
| ENSMUSG00000098720 | NA            | NA     | yellow       |
| ENSMUSG00000003208 | Ccdc94        | 72886  | blue         |
| ENSMUSG00000107600 | NA            | NA     | turquoise    |
| ENSMUSG00000038650 | Rnh1          | 107702 | brown        |
| ENSMUSG00000090790 | NA            | NA     | cyan         |
| ENSMUSG00000028140 | Mrpl9         | 78523  | blue         |
| ENSMUSG00000107608 | NA            | NA     | turquoise    |
| ENSMUSG00000056310 | Tyw1          | 100929 | green        |

|                    |               |           |              |
|--------------------|---------------|-----------|--------------|
| ENSMUSG00000055897 | Ppp4r1l-ps    | 100043911 | turquoise    |
| ENSMUSG00000038658 | Ric1          | 226089    | turquoise    |
| ENSMUSG00000028145 | Them4         | 75778     | turquoise    |
| ENSMUSG00000056316 | NA            | NA        | brown        |
| ENSMUSG00000073557 | Ppp1r12b      | 329251    | turquoise    |
| ENSMUSG00000028149 | Rap1gds1      | 229877    | green        |
| ENSMUSG00000041650 | Pcca          | 110821    | turquoise    |
| ENSMUSG00000063047 | NA            | NA        | blue         |
| ENSMUSG00000024410 | 3110002H16Rik | 76482     | turquoise    |
| ENSMUSG00000024411 | Aqp4          | 11829     | purple       |
| ENSMUSG00000063049 | Ing2          | 69260     | salmon       |
| ENSMUSG00000041653 | Pnpla3        | 116939    | turquoise    |
| ENSMUSG00000024413 | Npc1          | 18145     | purple       |
| ENSMUSG00000041654 | Slc39a11      | 69806     | blue         |
| ENSMUSG00000034926 | Dhcr24        | 74754     | yellow       |
| ENSMUSG00000024414 | Mrpl27        | 94064     | blue         |
| ENSMUSG00000034928 | Rnf44         | 105239    | green        |
| ENSMUSG00000031143 | Ccdc22        | 54638     | cyan         |
| ENSMUSG00000031144 | Syp           | 20977     | turquoise    |
| ENSMUSG00000041658 | Rragb         | 245670    | lightcyan    |
| ENSMUSG00000031146 | NA            | NA        | turquoise    |
| ENSMUSG00000031148 | Gpkow         | 209416    | blue         |
| ENSMUSG00000031149 | Praf2         | 54637     | blue         |
| ENSMUSG00000066592 | NA            | NA        | black        |
| ENSMUSG00000059866 | Tnip2         | 231130    | turquoise    |
| ENSMUSG00000049354 | Dcaf7         | 71833     | blue         |
| ENSMUSG00000066595 | Mfsd7b        | 226844    | turquoise    |
| ENSMUSG00000027962 | Vcam1         | 22329     | purple       |
| ENSMUSG00000027963 | Extl2         | 58193     | brown        |
| ENSMUSG00000103646 | NA            | NA        | blue         |
| ENSMUSG00000067017 | NA            | NA        | blue         |
| ENSMUSG00000062861 | Zfp28         | 22690     | turquoise    |
| ENSMUSG00000024181 | Mrpl28        | 68611     | green        |
| ENSMUSG00000017453 | Pipox         | 19193     | turquoise    |
| ENSMUSG00000024182 | Axin1         | 12005     | blue         |
| ENSMUSG00000103649 | NA            | NA        | turquoise    |
| ENSMUSG00000027968 | Larp7         | 28036     | green        |
| ENSMUSG00000045624 | Esf1          | 66580     | brown        |
| ENSMUSG00000045625 | Pigz          | 239827    | pink         |
| ENSMUSG00000062866 | Phactr2       | 215789    | turquoise    |
| ENSMUSG00000062867 | Impdh2        | 23918     | black        |
| ENSMUSG00000024187 | Fam234a       | 106581    | yellow       |
| ENSMUSG00000024188 | Luc7l         | 66978     | blue         |
| ENSMUSG00000030960 | Mettl10       | 72096     | turquoise    |
| ENSMUSG00000020451 | Limk2         | 16886     | yellow       |
| ENSMUSG00000030965 | Fam175b       | 109359    | blue         |
| ENSMUSG00000020453 | Patz1         | 56218     | blue         |
| ENSMUSG00000020454 | Eif4enif1     | 74203     | blue         |
| ENSMUSG00000030967 | Zranb1        | 360216    | blue         |
| ENSMUSG00000020455 | Trim11        | 94091     | blue         |
| ENSMUSG00000020456 | Ogdh          | 18293     | midnightblue |
| ENSMUSG00000020457 | Drg1          | 13494     | green        |
| ENSMUSG00000020458 | Rtn4          | 68585     | turquoise    |
| ENSMUSG00000020459 | Mtif2         | 76784     | magenta      |

|                    |               |        |              |
|--------------------|---------------|--------|--------------|
| ENSMUSG00000107610 | NA            | NA     | yellow       |
| ENSMUSG00000107612 | NA            | NA     | blue         |
| ENSMUSG00000038664 | Herc1         | 235439 | brown        |
| ENSMUSG00000107618 | NA            | NA     | turquoise    |
| ENSMUSG00000028152 | Tspan5        | 56224  | turquoise    |
| ENSMUSG00000038665 | Dgki          | 320127 | pink         |
| ENSMUSG00000028156 | NA            | NA     | black        |
| ENSMUSG00000063052 | NA            | NA     | magenta      |
| ENSMUSG00000066838 | Zfp772        | 232855 | turquoise    |
| ENSMUSG00000066839 | Ecsit         | 26940  | brown        |
| ENSMUSG00000028158 | Mttp          | 17777  | turquoise    |
| ENSMUSG00000034930 | Rtkn          | 20166  | turquoise    |
| ENSMUSG00000028159 | Dapp1         | 26377  | turquoise    |
| ENSMUSG00000091223 | NA            | NA     | blue         |
| ENSMUSG00000073569 | NA            | NA     | green        |
| ENSMUSG00000034931 | Dhx8          | 217207 | green        |
| ENSMUSG00000006763 | Saal1         | 78935  | blue         |
| ENSMUSG00000034932 | Mrpl54        | 66047  | red          |
| ENSMUSG00000024420 | Zfp521        | 225207 | turquoise    |
| ENSMUSG00000024421 | Lama3         | 16774  | yellow       |
| ENSMUSG00000024422 | Dhx16         | 69192  | yellow       |
| ENSMUSG00000091228 | NA            | NA     | pink         |
| ENSMUSG00000100104 | NA            | NA     | yellow       |
| ENSMUSG00000013495 | Tmem175       | 72392  | turquoise    |
| ENSMUSG00000024423 | Impact        | 16210  | blue         |
| ENSMUSG00000024424 | Ttc39c        | 72747  | turquoise    |
| ENSMUSG00000024425 | Ndfip1        | 65113  | turquoise    |
| ENSMUSG00000031153 | Gripap1       | 54645  | green        |
| ENSMUSG00000024426 | Atat1         | 73242  | turquoise    |
| ENSMUSG00000031154 | Otud5         | 54644  | brown        |
| ENSMUSG00000031155 | Pim2          | 18715  | brown        |
| ENSMUSG00000031156 | Slc35a2       | 22232  | turquoise    |
| ENSMUSG00000024429 | Gnl1          | 14670  | blue         |
| ENSMUSG00000031157 | Pqbp1         | 54633  | pink         |
| ENSMUSG00000031158 | NA            | NA     | red          |
| ENSMUSG00000107383 | NA            | NA     | black        |
| ENSMUSG00000107389 | NA            | NA     | black        |
| ENSMUSG00000056091 | St3gal5       | 20454  | yellow       |
| ENSMUSG00000084260 | NA            | NA     | greenyellow  |
| ENSMUSG00000059878 | Zfp422        | 67255  | red          |
| ENSMUSG00000103653 | NA            | NA     | midnightblue |
| ENSMUSG00000038900 | NA            | NA     | black        |
| ENSMUSG00000024190 | Dusp1         | 19252  | green        |
| ENSMUSG00000038902 | Pogz          | 229584 | turquoise    |
| ENSMUSG00000024191 | Bnip1         | 224630 | brown        |
| ENSMUSG00000103658 | NA            | NA     | pink         |
| ENSMUSG00000024193 | Phf1          | 21652  | yellow       |
| ENSMUSG00000024194 | Cuta          | 67675  | brown        |
| ENSMUSG00000017466 | Timp2         | 21858  | greenyellow  |
| ENSMUSG00000045636 | Mtus1         | 102103 | turquoise    |
| ENSMUSG00000052364 | B630019K06Ril | 102941 | brown        |
| ENSMUSG00000024197 | Plin3         | 66905  | turquoise    |
| ENSMUSG00000038909 | Kat7          | 217127 | brown        |
| ENSMUSG00000073805 | Fam196a       | 627214 | turquoise    |



|                    |              |           |        |              |
|--------------------|--------------|-----------|--------|--------------|
| ENSMUSG00000035125 | Gcfc2        |           | 330361 | blue         |
| ENSMUSG00000030970 | Ctbp2        |           | 13017  | yellow       |
| ENSMUSG00000045639 | Zfp629       |           | 320683 | turquoise    |
| ENSMUSG00000035126 | Wdr78        |           | 242584 | turquoise    |
| ENSMUSG00000052369 | Tmem106c     |           | 380967 | green        |
| ENSMUSG00000020460 | Rps27a       |           | 78294  | black        |
| ENSMUSG00000035129 | NA           | NA        |        | yellow       |
| ENSMUSG00000070025 | NA           | NA        |        | turquoise    |
| ENSMUSG00000020461 | Clhc1        |           | 73324  | turquoise    |
| ENSMUSG00000020462 | Cfap36       |           | 216618 | brown        |
| ENSMUSG00000020463 | Smek2        |           | 104570 | brown        |
| ENSMUSG00000020464 | Pnpt1        |           | 71701  | blue         |
| ENSMUSG00000013736 | Trnt1        |           | 70047  | green        |
| ENSMUSG00000030978 | Rrm1         |           | 20133  | red          |
| ENSMUSG00000030979 | Uros         |           | 22276  | brown        |
| ENSMUSG00000003226 | Ranbp2       |           | 19386  | turquoise    |
| ENSMUSG00000003227 | Edar         |           | 13608  | magenta      |
| ENSMUSG00000038671 | Arfrp1       |           | 76688  | turquoise    |
| ENSMUSG00000049600 | Zbtb45       |           | 232879 | blue         |
| ENSMUSG00000028161 | Ppp3ca       |           | 19055  | yellow       |
| ENSMUSG00000028163 | Nfkb1        |           | 18033  | midnightblue |
| ENSMUSG00000028164 | Manba        |           | 110173 | turquoise    |
| ENSMUSG00000028165 | Cisd2        |           | 67006  | green        |
| ENSMUSG00000038679 | Trps1        |           | 83925  | turquoise    |
| ENSMUSG00000049606 | Zfp644       |           | 52397  | blue         |
| ENSMUSG00000063063 | Ctnna2       |           | 12386  | turquoise    |
| ENSMUSG00000034940 | Synrg        |           | 217030 | turquoise    |
| ENSMUSG00000063065 | Mapk3        |           | 26417  | red          |
| ENSMUSG00000091233 | LOC101055953 | 101055953 |        | yellow       |
| ENSMUSG00000041671 | NA           | NA        |        | turquoise    |
| ENSMUSG00000024431 | Nr3c1        |           | 14815  | turquoise    |
| ENSMUSG00000031161 | Hdac6        |           | 15185  | blue         |
| ENSMUSG00000017707 | Serinc3      |           | 26943  | blue         |
| ENSMUSG00000024436 | Mrps18b      |           | 66973  | green        |
| ENSMUSG00000034949 | Zfr2         |           | 103406 | turquoise    |
| ENSMUSG00000024437 | NA           | NA        |        | pink         |
| ENSMUSG00000031166 | Wdr13        |           | 73447  | turquoise    |
| ENSMUSG00000031167 | Rbm3         |           | 19652  | red          |
| ENSMUSG00000031168 | Ebp          |           | 13595  | turquoise    |
| ENSMUSG00000031169 | Porcn        |           | 53627  | yellow       |
| ENSMUSG00000020704 | Asic2        |           | 11418  | turquoise    |
| ENSMUSG00000020705 | Ddx42        |           | 72047  | blue         |
| ENSMUSG00000020706 | Ftsj3        |           | 56095  | salmon       |
| ENSMUSG00000059883 | Irak4        |           | 266632 | turquoise    |
| ENSMUSG00000020707 | Rnf135       |           | 71956  | yellow       |
| ENSMUSG00000020708 | Psmc5        |           | 19184  | brown        |
| ENSMUSG00000094786 | NA           | NA        |        | turquoise    |
| ENSMUSG00000027981 | Rnpc3        |           | 67225  | yellow       |
| ENSMUSG00000084274 | Gm12504      |           | 623796 | tan          |
| ENSMUSG00000103663 | NA           | NA        |        | yellow       |
| ENSMUSG00000095202 | NA           | NA        |        | greenyellow  |
| ENSMUSG00000027983 | NA           | NA        |        | blue         |
| ENSMUSG00000095203 | NA           | NA        |        | grey60       |
| ENSMUSG00000084277 | NA           | NA        |        | greenyellow  |

|                    |               |       |        |              |
|--------------------|---------------|-------|--------|--------------|
| ENSMUSG00000027984 | Hadh          |       | 15107  | turquoise    |
| ENSMUSG00000027985 | Lef1          |       | 16842  | turquoise    |
| ENSMUSG00000067038 | NA            | NA    |        | yellow       |
| ENSMUSG00000038914 | Dido1         |       | 23856  | turquoise    |
| ENSMUSG00000028402 | Mpdz          |       | 17475  | blue         |
| ENSMUSG00000038916 | Soga3         |       | 67412  | turquoise    |
| ENSMUSG00000028403 | Zdhhc21       |       | 68268  | turquoise    |
| ENSMUSG00000052372 | NA            | NA    |        | turquoise    |
| ENSMUSG00000052373 | Mpp3          |       | 13384  | blue         |
| ENSMUSG00000035133 | Arhgap5       |       | 11855  | purple       |
| ENSMUSG00000017478 | Zc3h18        |       | 76014  | blue         |
| ENSMUSG00000028405 | Aco1          |       | 11428  | blue         |
| ENSMUSG00000070031 | Sp140         |       | 434484 | turquoise    |
| ENSMUSG00000028407 | NA            | NA    |        | turquoise    |
| ENSMUSG00000030980 | Knop1         |       | 66356  | turquoise    |
| ENSMUSG00000028409 | NA            | NA    |        | black        |
| ENSMUSG00000030982 | 9030624J02Rik |       | 71517  | turquoise    |
| ENSMUSG00000035139 | Secisbp2      |       | 75420  | turquoise    |
| ENSMUSG00000030983 | Bccip         |       | 66165  | red          |
| ENSMUSG00000020471 | Pold2         |       | 18972  | black        |
| ENSMUSG00000041911 | Dlx1          |       | 13390  | cyan         |
| ENSMUSG00000020472 | Zkscan17      |       | 268417 | pink         |
| ENSMUSG00000041912 | Tdrkh         |       | 72634  | red          |
| ENSMUSG00000030986 | Dhx32         |       | 101437 | blue         |
| ENSMUSG00000031400 | G6pdx         |       | 14381  | turquoise    |
| ENSMUSG00000003233 | Dvl3          |       | 13544  | blue         |
| ENSMUSG00000020474 | Polm          |       | 54125  | turquoise    |
| ENSMUSG00000030987 | Stim1         |       | 20866  | brown        |
| ENSMUSG00000041915 | Ammecr1l      |       | 225339 | turquoise    |
| ENSMUSG00000003234 | Abcf3         |       | 27406  | turquoise    |
| ENSMUSG00000031402 | Mpp1          |       | 17524  | brown        |
| ENSMUSG00000003235 | Eif2b5        |       | 224045 | red          |
| ENSMUSG00000020476 | Dbnl          |       | 13169  | red          |
| ENSMUSG00000031403 | Dkc1          |       | 245474 | black        |
| ENSMUSG00000020477 | Mrps24        |       | 64660  | turquoise    |
| ENSMUSG00000088246 | NA            | NA    |        | turquoise    |
| ENSMUSG00000038683 | Pak1ip1       |       | 68083  | black        |
| ENSMUSG00000049612 | Omg           |       | 18377  | purple       |
| ENSMUSG00000038685 | Rtel1         |       | 269400 | blue         |
| ENSMUSG00000039100 |               | 5-Mar | 223455 | turquoise    |
| ENSMUSG00000028173 | Wls           |       | 68151  | purple       |
| ENSMUSG00000056342 | Usp34         |       | 17847  | turquoise    |
| ENSMUSG00000039105 | Atp6v1g1      |       | 66290  | midnightblue |
| ENSMUSG00000006782 | Cnp           |       | 12799  | purple       |
| ENSMUSG00000028179 | Cth           |       | 107869 | turquoise    |
| ENSMUSG00000034951 | Cog7          |       | 233824 | green        |
| ENSMUSG00000103905 | NA            | NA    |        | grey60       |
| ENSMUSG00000039108 | Lsm14b        |       | 241846 | turquoise    |
| ENSMUSG00000063077 | Kif1b         |       | 16561  | yellow       |
| ENSMUSG00000024442 | 0610009O20Rik |       | 66839  | yellow       |
| ENSMUSG00000017715 | Pgs1          |       | 74451  | turquoise    |
| ENSMUSG00000031171 | Ftsj1         |       | 54632  | blue         |
| ENSMUSG00000041684 | Bivm          |       | 246229 | brown        |
| ENSMUSG00000041685 | Fcho2         |       | 218503 | turquoise    |

|                    |           |       |        |              |
|--------------------|-----------|-------|--------|--------------|
| ENSMUSG00000017716 | Birc5     |       | 11799  | magenta      |
| ENSMUSG00000024446 | NA        | NA    |        | turquoise    |
| ENSMUSG00000031174 | Rpgr      |       | 19893  | turquoise    |
| ENSMUSG00000041688 | Amot      |       | 27494  | turquoise    |
| ENSMUSG00000007207 | Stx1a     |       | 20907  | brown        |
| ENSMUSG00000031176 | Dynlt3    |       | 67117  | turquoise    |
| ENSMUSG00000042104 | Uggt2     |       | 66435  | turquoise    |
| ENSMUSG00000042105 | Inpp5f    |       | 101490 | blue         |
| ENSMUSG00000042109 | Csdc2     |       | 105859 | red          |
| ENSMUSG00000059890 | Ube4a     |       | 140630 | blue         |
| ENSMUSG00000020715 | NA        | NA    |        | turquoise    |
| ENSMUSG00000020716 | Nf1       |       | 18015  | turquoise    |
| ENSMUSG00000020717 | Pecam1    |       | 18613  | brown        |
| ENSMUSG00000020718 | Polg2     |       | 50776  | grey60       |
| ENSMUSG00000010205 | Raver1    |       | 71766  | green        |
| ENSMUSG00000059895 | Ptp4a3    |       | 19245  | yellow       |
| ENSMUSG00000020719 | Ddx5      |       | 13207  | green        |
| ENSMUSG00000059897 | NA        | NA    |        | lightcyan    |
| ENSMUSG00000103672 | NA        | NA    |        | yellow       |
| ENSMUSG00000084284 | NA        | NA    |        | lightcyan    |
| ENSMUSG00000027993 | Trim2     |       | 80890  | yellow       |
| ENSMUSG00000084288 | NA        | NA    |        | turquoise    |
| ENSMUSG00000084289 | NA        | NA    |        | greenyellow  |
| ENSMUSG00000028410 | Dnaja1    |       | 15502  | blue         |
| ENSMUSG00000095217 | Hist1h2bn |       | 319187 | turquoise    |
| ENSMUSG00000027997 | Casp6     |       | 12368  | yellow       |
| ENSMUSG00000028411 | Aptx      |       | 66408  | blue         |
| ENSMUSG00000017485 | Top2b     |       | 21974  | blue         |
| ENSMUSG00000027998 | Plrg1     |       | 53317  | blue         |
| ENSMUSG00000028412 | Slc44a1   |       | 100434 | green        |
| ENSMUSG00000027999 | Pla2g12a  |       | 66350  | green        |
| ENSMUSG00000028413 | B4galt1   |       | 14595  | turquoise    |
| ENSMUSG00000035142 | NA        | NA    |        | lightcyan    |
| ENSMUSG00000028414 | Fktn      |       | 246179 | turquoise    |
| ENSMUSG00000062896 | NA        | NA    |        | tan          |
| ENSMUSG00000028416 | Bag1      |       | 12017  | black        |
| ENSMUSG00000045658 | Pid1      |       | 98496  | yellow       |
| ENSMUSG00000030990 | Pgap2     |       | 233575 | blue         |
| ENSMUSG00000063314 | NA        | NA    |        | tan          |
| ENSMUSG00000028419 | Chmp5     |       | 76959  | blue         |
| ENSMUSG00000063316 | Rpl27     |       | 19942  | black        |
| ENSMUSG00000070044 | Fam149a   |       | 212326 | turquoise    |
| ENSMUSG00000063317 | Usp31     |       | 76179  | blue         |
| ENSMUSG00000041921 | Metap1d   |       | 66559  | blue         |
| ENSMUSG00000020482 | Ccdc117   |       | 104479 | grey60       |
| ENSMUSG00000070047 | Fat1      |       | 14107  | blue         |
| ENSMUSG00000041923 | Nol4      |       | 319211 | cyan         |
| ENSMUSG00000020483 | Dynll2    |       | 68097  | blue         |
| ENSMUSG00000020484 | Xbp1      |       | 22433  | turquoise    |
| ENSMUSG00000020485 | Supt4a    |       | 20922  | midnightblue |
| ENSMUSG00000020486 |           | 3-Sep | 18952  | turquoise    |
| ENSMUSG00000041926 | Rnpep     |       | 215615 | blue         |
| ENSMUSG00000098761 | NA        | NA    |        | turquoise    |
| ENSMUSG00000038690 | Atp5j2    |       | 57423  | turquoise    |

|                    |               |           |           |
|--------------------|---------------|-----------|-----------|
| ENSMUSG00000028180 | Zranb2        | 53861     | blue      |
| ENSMUSG00000073590 | NA            | NA        | turquoise |
| ENSMUSG00000038695 | Josd2         | 66124     | turquoise |
| ENSMUSG00000038696 | Mapkap1       | 227743    | blue      |
| ENSMUSG00000049624 | Slc17a5       | 235504    | brown     |
| ENSMUSG00000038697 | Taf5l         | 102162    | green     |
| ENSMUSG00000028184 | Adgrl2        | 99633     | blue      |
| ENSMUSG00000028187 | Rpf1          | 70285     | black     |
| ENSMUSG00000028188 | Spata1        | 70951     | turquoise |
| ENSMUSG00000028189 | Ctbs          | 74245     | blue      |
| ENSMUSG00000039117 | Taf4a         | 228980    | turquoise |
| ENSMUSG00000063087 | Gm10125       | 791318    | turquoise |
| ENSMUSG00000103916 | NA            | NA        | turquoise |
| ENSMUSG00000100131 | NA            | NA        | yellow    |
| ENSMUSG00000017721 | Pigt          | 78928     | turquoise |
| ENSMUSG00000024454 | Hdac3         | 15183     | blue      |
| ENSMUSG00000024456 | Diaph1        | 13367     | turquoise |
| ENSMUSG00000041697 | Cox6a1        | 12861     | turquoise |
| ENSMUSG00000042111 | Ccdc115       | 69668     | blue      |
| ENSMUSG00000024457 | Trim26        | 22670     | turquoise |
| ENSMUSG00000007216 | Zfp775        | 243372    | blue      |
| ENSMUSG00000042116 | Vwa1          | 246228    | yellow    |
| ENSMUSG00000020720 | Psm12         | 66997     | red       |
| ENSMUSG00000020721 | Helz          | 78455     | turquoise |
| ENSMUSG00000020728 | Cep112        | 76380     | magenta   |
| ENSMUSG00000038930 | Rccd1         | 269955    | yellow    |
| ENSMUSG00000067058 | Rps15a-ps5    | 100042335 | black     |
| ENSMUSG00000104103 | NA            | NA        | turquoise |
| ENSMUSG00000035150 | Eif2s3x       | 26905     | green     |
| ENSMUSG00000035151 | Elmod2        | 244548    | turquoise |
| ENSMUSG00000028423 | Nfx1          | 74164     | blue      |
| ENSMUSG00000038936 | Sccpdh        | 109232    | yellow    |
| ENSMUSG00000045665 | Mfsd5         | 106073    | turquoise |
| ENSMUSG00000035152 | Ap2b1         | 71770     | green     |
| ENSMUSG00000063320 | 1190007I07Rik | 544717    | yellow    |
| ENSMUSG00000017499 | Cdc6          | 23834     | salmon    |
| ENSMUSG00000052395 | Rft1          | 328370    | pink      |
| ENSMUSG00000028426 | Rad23b        | 19359     | blue      |
| ENSMUSG00000052397 | Ezr           | 22350     | turquoise |
| ENSMUSG00000073838 | Tufm          | 233870    | blue      |
| ENSMUSG00000020491 | NA            | NA        | turquoise |
| ENSMUSG00000063328 | NA            | NA        | turquoise |
| ENSMUSG00000020492 | NA            | NA        | green     |
| ENSMUSG00000041935 | AW549877      | 106064    | brown     |
| ENSMUSG00000020495 | Smg8          | 74133     | salmon    |
| ENSMUSG00000031422 | Morf4l2       | 56397     | black     |
| ENSMUSG00000020496 | Rnf187        | 108660    | black     |
| ENSMUSG00000041936 | Agrn          | 11603     | yellow    |
| ENSMUSG00000031425 | NA            | NA        | turquoise |
| ENSMUSG00000041939 | Mvk           | 17855     | yellow    |
| ENSMUSG00000031428 | Zcchc18       | 66995     | turquoise |
| ENSMUSG00000031429 | Psm10         | 53380     | turquoise |
| ENSMUSG00000107653 | NA            | NA        | yellow    |
| ENSMUSG00000028191 | Bcl10         | 12042     | blue      |

|                    |               |           |             |
|--------------------|---------------|-----------|-------------|
| ENSMUSG00000028194 | Ddah1         | 69219     | greenyellow |
| ENSMUSG00000028195 | Cyr61         | 16007     | yellow      |
| ENSMUSG00000066877 | Nck2          | 17974     | turquoise   |
| ENSMUSG00000066878 | NA            | NA        | magenta     |
| ENSMUSG00000103922 | NA            | NA        | turquoise   |
| ENSMUSG00000039126 | Prune2        | 353211    | turquoise   |
| ENSMUSG00000103924 | NA            | NA        | turquoise   |
| ENSMUSG00000028199 | Cryz          | 12972     | turquoise   |
| ENSMUSG00000056367 | Actr3b        | 242894    | blue        |
| ENSMUSG00000091264 | Smim13        | 108934    | turquoise   |
| ENSMUSG00000074024 | 4632427E13Rik | 666737    | green       |
| ENSMUSG00000039128 | Cdc123        | 98828     | blue        |
| ENSMUSG00000034973 | Dopey1        | 320615    | turquoise   |
| ENSMUSG00000034974 | Dapk3         | 13144     | turquoise   |
| ENSMUSG00000024462 | Gabbr1        | 54393     | purple      |
| ENSMUSG00000017734 | Dbnidd2       | 52840     | yellow      |
| ENSMUSG00000091269 | NA            | NA        | red         |
| ENSMUSG00000052632 | Asap2         | 211914    | yellow      |
| ENSMUSG00000080800 | NA            | NA        | turquoise   |
| ENSMUSG00000100147 | 1700047M11Rik | 67330     | turquoise   |
| ENSMUSG00000042121 | Ssh1          | 231637    | turquoise   |
| ENSMUSG00000031197 | Vbp1          | 22327     | brown       |
| ENSMUSG00000031198 | NA            | NA        | black       |
| ENSMUSG00000020733 | Slc9a3r1      | 26941     | red         |
| ENSMUSG00000020734 | Grin2c        | 14813     | purple      |
| ENSMUSG00000020736 | Nt5c          | 50773     | turquoise   |
| ENSMUSG00000020737 | Hn1           | 15374     | red         |
| ENSMUSG00000020738 | Sumo2         | 170930    | red         |
| ENSMUSG00000020739 | Nup85         | 445007    | magenta     |
| ENSMUSG00000077575 | NA            | NA        | lightcyan   |
| ENSMUSG00000103696 | NA            | NA        | blue        |
| ENSMUSG00000045671 | Spred2        | 114716    | turquoise   |
| ENSMUSG00000028430 | Nol6          | 230082    | green       |
| ENSMUSG00000038943 | Prc1          | 233406    | magenta     |
| ENSMUSG00000028431 | Ikbkap        | 230233    | blue        |
| ENSMUSG00000035161 | Ints6         | 18130     | turquoise   |
| ENSMUSG00000028433 | Ubap2         | 68926     | salmon      |
| ENSMUSG00000056602 | Fry           | 320365    | yellow      |
| ENSMUSG00000080573 | Mir467f       | 100316749 | pink        |
| ENSMUSG00000035164 | Zc3h12c       | 244871    | green       |
| ENSMUSG00000028436 | Dcaf12        | 68970     | red         |
| ENSMUSG00000038949 | Cnst          | 226744    | turquoise   |
| ENSMUSG00000028437 | Ubap1         | 67123     | brown       |
| ENSMUSG00000063334 | Krr1          | 52705     | green       |
| ENSMUSG00000028438 | Kif24         | 109242    | magenta     |
| ENSMUSG00000028439 | Fam219a       | 71901     | turquoise   |
| ENSMUSG00000056608 | Chd9          | 109151    | green       |
| ENSMUSG00000091509 | NA            | NA        | turquoise   |
| ENSMUSG00000031431 | Tsc22d3       | 14605     | turquoise   |
| ENSMUSG00000031432 | Prps1         | 19139     | black       |
| ENSMUSG00000031433 | Rbm41         | 237073    | turquoise   |
| ENSMUSG00000041949 | Tango6        | 272538    | magenta     |
| ENSMUSG00000003269 | Cyth2         | 19158     | red         |
| ENSMUSG00000098789 | Jmjd7         | 433466    | brown       |

|                    |               |        |           |
|--------------------|---------------|--------|-----------|
| ENSMUSG00000066880 | Zfp617        | 170938 | turquoise |
| ENSMUSG00000039130 | Zc3hc1        | 232679 | green     |
| ENSMUSG00000049643 | 2310022A10Rik | 66367  | blue      |
| ENSMUSG00000103931 | NA            | NA     | yellow    |
| ENSMUSG00000074030 | Exoc8         | 102058 | grey60    |
| ENSMUSG00000103933 | NA            | NA     | blue      |
| ENSMUSG00000039137 | Whrn          | 73750  | lightcyan |
| ENSMUSG00000074034 | NA            | NA     | red       |
| ENSMUSG00000091277 | NA            | NA     | turquoise |
| ENSMUSG00000100153 | NA            | NA     | green     |
| ENSMUSG00000024474 | Ik            | 24010  | green     |
| ENSMUSG00000035401 | Emsy          | 233545 | brown     |
| ENSMUSG00000017747 | Ghdc          | 80860  | turquoise |
| ENSMUSG00000100158 | NA            | NA     | blue      |
| ENSMUSG00000024477 | Pggt1b        | 225467 | black     |
| ENSMUSG00000045917 | 6330416G13Rik | 230279 | turquoise |
| ENSMUSG00000042133 | Ppig          | 228005 | blue      |
| ENSMUSG00000020740 | Gga3          | 260302 | pink      |
| ENSMUSG00000080818 | NA            | NA     | turquoise |
| ENSMUSG00000020741 | Cluh          | 74148  | yellow    |
| ENSMUSG00000042138 | Msantd2       | 235184 | brown     |
| ENSMUSG00000003500 | Impdh1        | 23917  | cyan      |
| ENSMUSG00000020743 | Mif4gd        | 69674  | turquoise |
| ENSMUSG00000020744 | Slc25a19      | 67283  | brown     |
| ENSMUSG00000020745 | Pafah1b1      | 18472  | turquoise |
| ENSMUSG00000020747 | Tmem94        | 71947  | brown     |
| ENSMUSG00000067071 | Hes6          | 55927  | red       |
| ENSMUSG00000107906 | NA            | NA     | blue      |
| ENSMUSG00000038954 | Supt3         | 109115 | turquoise |
| ENSMUSG00000035171 | 1110059E24Rik | 66206  | green     |
| ENSMUSG00000028443 | Nudt2         | 66401  | turquoise |
| ENSMUSG00000056612 | Ppp1r14b      | 18938  | red       |
| ENSMUSG00000035172 | Plekhh3       | 217198 | turquoise |
| ENSMUSG00000038957 | NA            | NA     | blue      |
| ENSMUSG00000104126 | NA            | NA     | red       |
| ENSMUSG00000028444 | Cntfr         | 12804  | brown     |
| ENSMUSG00000035173 | Ccdc186       | 213993 | turquoise |
| ENSMUSG00000028445 | Enho          | 69638  | purple    |
| ENSMUSG00000028447 | Dctn3         | 53598  | green     |
| ENSMUSG00000091512 | Lamtor3       | 56692  | turquoise |
| ENSMUSG00000091515 | NA            | NA     | brown     |
| ENSMUSG00000024712 | Rfk           | 54391  | yellow    |
| ENSMUSG00000081005 | NA            | NA     | turquoise |
| ENSMUSG00000031441 | Atp11a        | 50770  | turquoise |
| ENSMUSG00000003273 | Car11         | 12348  | turquoise |
| ENSMUSG00000013787 | Ehmt2         | 110147 | blue      |
| ENSMUSG00000031442 | Mcf2l         | 17207  | blue      |
| ENSMUSG00000041958 | Pigs          | 276846 | yellow    |
| ENSMUSG00000031446 | Cul4a         | 99375  | green     |
| ENSMUSG00000041959 | S100a10       | 20194  | purple    |
| ENSMUSG00000003279 | Dlgap1        | 224997 | turquoise |
| ENSMUSG00000031447 | Lamp1         | 16783  | red       |
| ENSMUSG00000066892 | Fbxl12        | 30843  | turquoise |
| ENSMUSG00000066894 | Vsig10        | 231668 | turquoise |

|                    |               |        |              |
|--------------------|---------------|--------|--------------|
| ENSMUSG00000049657 | Zbtb5         | 230119 | turquoise    |
| ENSMUSG00000049658 | Bdp1          | 544971 | cyan         |
| ENSMUSG00000049659 | Aftph         | 216549 | blue         |
| ENSMUSG00000103945 | NA            | NA     | pink         |
| ENSMUSG00000039148 | Sart1         | 20227  | purple       |
| ENSMUSG00000091285 | NA            | NA     | greenyellow  |
| ENSMUSG00000024480 | Ap3s1         | 11777  | turquoise    |
| ENSMUSG00000034993 | Vat1          | 26949  | turquoise    |
| ENSMUSG00000034994 | Eef2          | 13629  | midnightblue |
| ENSMUSG00000100164 | 2610306M01Ril | 67170  | blue         |
| ENSMUSG00000024483 | Ankhd1        | 108857 | yellow       |
| ENSMUSG00000034998 | Foxn2         | 14236  | brown        |
| ENSMUSG00000024486 | Hbegf         | 15200  | purple       |
| ENSMUSG00000035413 | Tmem98        | 103743 | black        |
| ENSMUSG00000024487 | Yipf5         | 67180  | brown        |
| ENSMUSG00000080823 | NA            | NA     | brown        |
| ENSMUSG00000080824 | NA            | NA     | turquoise    |
| ENSMUSG00000052656 | Rnf103        | 22644  | brown        |
| ENSMUSG00000042148 | Cox10         | 70383  | yellow       |
| ENSMUSG00000080829 | NA            | NA     | salmon       |
| ENSMUSG00000020752 | Recql5        | 170472 | yellow       |
| ENSMUSG00000070319 | Eif3g         | 53356  | black        |
| ENSMUSG00000020755 | NA            | NA     | green        |
| ENSMUSG00000003518 | Dusp3         | 72349  | turquoise    |
| ENSMUSG00000095253 | Zfp799        | 240064 | turquoise    |
| ENSMUSG00000045690 | Wdr89         | 72338  | pink         |
| ENSMUSG00000045691 | Thtpa         | 105663 | blue         |
| ENSMUSG00000107917 | NA            | NA     | turquoise    |
| ENSMUSG00000038965 | Ube2l3        | 22195  | turquoise    |
| ENSMUSG00000028452 | Vcp           | 269523 | green        |
| ENSMUSG00000035181 | Heatr5a       | 320487 | turquoise    |
| ENSMUSG00000028453 | Fancg         | 60534  | pink         |
| ENSMUSG00000045694 | NA            | NA     | tan          |
| ENSMUSG00000038967 | Pdk2          | 18604  | blue         |
| ENSMUSG00000028454 | Pigo          | 56703  | turquoise    |
| ENSMUSG00000028455 | Stoml2        | 66592  | black        |
| ENSMUSG00000046111 | Cep295        | 319675 | brown        |
| ENSMUSG00000035184 | Fam124a       | 629059 | turquoise    |
| ENSMUSG00000028456 | Unc13b        | 22249  | turquoise    |
| ENSMUSG00000073867 | NA            | NA     | turquoise    |
| ENSMUSG00000081010 | NA            | NA     | brown        |
| ENSMUSG00000056629 | Fkbp2         | 14227  | turquoise    |
| ENSMUSG00000063358 | Mapk1         | 26413  | green        |
| ENSMUSG00000041961 | Znrf3         | 407821 | yellow       |
| ENSMUSG00000081013 | NA            | NA     | pink         |
| ENSMUSG00000024725 | NA            | NA     | brown        |
| ENSMUSG00000031453 | Rasa3         | 19414  | turquoise    |
| ENSMUSG00000041966 | Dcaf17        | 75763  | blue         |
| ENSMUSG00000024726 | Carnmt1       | 67383  | brown        |
| ENSMUSG00000031458 | Coprs         | 66423  | blue         |
| ENSMUSG00000067321 | NA            | NA     | red          |
| ENSMUSG00000108107 | NA            | NA     | tan          |
| ENSMUSG00000056394 | Lig1          | 16881  | salmon       |
| ENSMUSG00000039154 | Shd           | 20420  | turquoise    |

|                    |               |           |              |
|--------------------|---------------|-----------|--------------|
| ENSMUSG00000103953 | NA            | NA        | brown        |
| ENSMUSG00000039156 | Stim2         | 116873    | blue         |
| ENSMUSG00000017760 | Ctsa          | 19025     | green        |
| ENSMUSG00000039157 | Fam102a       | 98952     | turquoise    |
| ENSMUSG00000039158 | Akna          | 100182    | blue         |
| ENSMUSG00000039159 | Ube2h         | 22214     | brown        |
| ENSMUSG00000103957 | NA            | NA        | yellow       |
| ENSMUSG00000024491 | Rbm27         | 225432    | blue         |
| ENSMUSG00000045932 | Ifit2         | 15958     | brown        |
| ENSMUSG00000017764 | Zswim1        | 71971     | blue         |
| ENSMUSG00000024493 | Lars          | 107045    | blue         |
| ENSMUSG00000017765 | Slc12a4       | 20498     | purple       |
| ENSMUSG00000045934 | Mtmr11        | 194126    | yellow       |
| ENSMUSG00000080832 | NA            | NA        | blue         |
| ENSMUSG00000024498 | Tcerg1        | 56070     | salmon       |
| ENSMUSG00000080836 | NA            | NA        | turquoise    |
| ENSMUSG00000042155 | Klhl23        | 277396    | blue         |
| ENSMUSG00000042156 | Dzip1         | 66573     | turquoise    |
| ENSMUSG00000080839 | NA            | NA        | turquoise    |
| ENSMUSG00000070327 | Rnf213        | 672511    | turquoise    |
| ENSMUSG00000020766 | Galk1         | 14635     | turquoise    |
| ENSMUSG00000003526 | Prodh         | 19125     | red          |
| ENSMUSG00000003527 | Dgcr14        | 27886     | blue         |
| ENSMUSG00000003528 | Slc25a1       | 13358     | turquoise    |
| ENSMUSG00000107921 | NA            | NA        | turquoise    |
| ENSMUSG00000107928 | NA            | NA        | turquoise    |
| ENSMUSG00000028461 | Ccdc107       | 622404    | yellow       |
| ENSMUSG00000038975 | Rabggtb       | 19352     | yellow       |
| ENSMUSG00000038976 | Ppp1r9b       | 217124    | turquoise    |
| ENSMUSG00000028465 | Tln1          | 21894     | green        |
| ENSMUSG00000063362 | Alg11         | 207958    | turquoise    |
| ENSMUSG00000028466 | Creb3         | 12913     | yellow       |
| ENSMUSG00000028467 | Gba2          | 230101    | turquoise    |
| ENSMUSG00000049907 | Ras11b        | 68939     | yellow       |
| ENSMUSG00000063364 | 3300002108Rik | 69277     | turquoise    |
| ENSMUSG00000073877 | Gm13306       | 100039863 | turquoise    |
| ENSMUSG00000028468 | Rgp1          | 242406    | turquoise    |
| ENSMUSG00000035198 | Tubg1         | 103733    | blue         |
| ENSMUSG00000081021 | NA            | NA        | turquoise    |
| ENSMUSG00000035199 | Arl6ip5       | 65106     | turquoise    |
| ENSMUSG00000084808 | NA            | NA        | brown        |
| ENSMUSG00000091537 | NA            | NA        | green        |
| ENSMUSG00000024732 | Ccdc86        | 108673    | blue         |
| ENSMUSG00000041974 | Spidr         | 224008    | green        |
| ENSMUSG00000041975 | Mettl8        | 228019    | blue         |
| ENSMUSG00000024735 | Prpf19        | 28000     | blue         |
| ENSMUSG00000024736 | Tmem132a      | 98170     | blue         |
| ENSMUSG00000041977 | Arhgef11      | 213498    | turquoise    |
| ENSMUSG00000052906 | Ubxn8         | 108159    | turquoise    |
| ENSMUSG00000003299 | Mrpl4         | 66163     | midnightblue |
| ENSMUSG00000031467 | NA            | NA        | blue         |
| ENSMUSG00000014226 | Cacybp        | 12301     | black        |
| ENSMUSG00000049670 | Morn4         | 226123    | blue         |
| ENSMUSG00000049672 | Zbtb14        | 22666     | turquoise    |



|                    |               |        |              |
|--------------------|---------------|--------|--------------|
| ENSMUSG00000039163 | Cmc1          | 67899  | turquoise    |
| ENSMUSG00000039164 | NA            | NA     | turquoise    |
| ENSMUSG00000039166 | Akap7         | 432442 | turquoise    |
| ENSMUSG00000074064 | Mlycd         | 56690  | turquoise    |
| ENSMUSG00000067336 | Bmpr2         | 12168  | grey60       |
| ENSMUSG00000028700 | Pomgnt1       | 68273  | turquoise    |
| ENSMUSG00000017774 | Myo1c         | 17913  | turquoise    |
| ENSMUSG00000028702 | Rad54l        | 19366  | salmon       |
| ENSMUSG00000080840 | NA            | NA     | yellow       |
| ENSMUSG00000017776 | NA            | NA     | yellow       |
| ENSMUSG00000028703 | Lrrc41        | 230654 | turquoise    |
| ENSMUSG00000017778 | NA            | NA     | turquoise    |
| ENSMUSG00000028706 | NA            | NA     | turquoise    |
| ENSMUSG00000052675 | Zfp112        | 57745  | turquoise    |
| ENSMUSG00000045948 | Mrps12        | 24030  | blue         |
| ENSMUSG00000052676 | Zmat1         | 215693 | turquoise    |
| ENSMUSG00000028708 | Mknk1         | 17346  | turquoise    |
| ENSMUSG00000028709 | Mob3c         | 100465 | turquoise    |
| ENSMUSG00000035437 | Rabgap1       | 227800 | turquoise    |
| ENSMUSG00000042165 | NA            | NA     | green        |
| ENSMUSG00000042167 | Papd4         | 100715 | salmon       |
| ENSMUSG00000020770 | Unk           | 217331 | turquoise    |
| ENSMUSG00000080848 | NA            | NA     | black        |
| ENSMUSG00000035439 | Haus8         | 76478  | red          |
| ENSMUSG00000003531 | Dgcr6         | 13353  | turquoise    |
| ENSMUSG00000031700 | Gpt2          | 108682 | turquoise    |
| ENSMUSG00000031701 | Dnaja2        | 56445  | blue         |
| ENSMUSG00000003534 | Ddr1          | 12305  | blue         |
| ENSMUSG00000020775 | Mrpl38        | 60441  | green        |
| ENSMUSG00000020776 | Fbf1          | 217335 | blue         |
| ENSMUSG00000031703 | Itfg1         | 71927  | yellow       |
| ENSMUSG00000020777 | Acox1         | 11430  | turquoise    |
| ENSMUSG00000020778 | Ten1          | 69535  | green        |
| ENSMUSG00000031706 | Rfx1          | 19724  | turquoise    |
| ENSMUSG00000031708 | Tecr          | 106529 | cyan         |
| ENSMUSG00000107932 | NA            | NA     | turquoise    |
| ENSMUSG00000038982 | Bloc1s5       | 17828  | yellow       |
| ENSMUSG00000107937 | NA            | NA     | turquoise    |
| ENSMUSG00000028470 | Hint2         | 68917  | turquoise    |
| ENSMUSG00000104156 | NA            | NA     | turquoise    |
| ENSMUSG00000028476 | Reck          | 53614  | blue         |
| ENSMUSG00000028478 | Cita          | 12757  | black        |
| ENSMUSG00000039405 | Prss23        | 76453  | yellow       |
| ENSMUSG00000073888 | Ccl27a        | 20301  | turquoise    |
| ENSMUSG00000028479 | Gne           | 50798  | turquoise    |
| ENSMUSG00000073889 | Il1ra1        | 16157  | turquoise    |
| ENSMUSG00000084817 | NA            | NA     | green        |
| ENSMUSG00000024740 | Ddb1          | 13194  | midnightblue |
| ENSMUSG00000074305 | NA            | NA     | turquoise    |
| ENSMUSG00000046138 | 9930021J03Rik | 240613 | turquoise    |
| ENSMUSG00000081034 | NA            | NA     | turquoise    |
| ENSMUSG00000046139 | Pat1          | 225929 | blue         |
| ENSMUSG00000091549 | NA            | NA     | lightcyan    |
| ENSMUSG00000052911 | Lamb2         | 16779  | turquoise    |

|                     |               |           |           |
|---------------------|---------------|-----------|-----------|
| ENSMUSG00000052912  | Smarca5-ps    | 545700    | salmon    |
| ENSMUSG00000014232  | Cluap1        | 76779     | blue      |
| ENSMUSG00000052914  | Cyp2j6        | 13110     | yellow    |
| ENSMUSG00000052915  | Msl1          | 74026     | turquoise |
| ENSMUSG00000052917  | Senp7         | 66315     | blue      |
| ENSMUSG00000042404  | Dennd4b       | 229541    | pink      |
| ENSMUSG00000031478  | Nek3          | 23954     | lightcyan |
| ENSMUSG00000042406  | Atf4          | 11911     | green     |
| ENSMUSG00000031479  | NA            | NA        | brown     |
| ENSMUSG00000042408  | Zmym6         | 100177    | green     |
| ENSMUSG00000049680  | Urgcp         | 72046     | turquoise |
| ENSMUSG00000010505  | Myt1          | 17932     | cyan      |
| ENSMUSG00000049686  | Orai1         | 109305    | yellow    |
| ENSMUSG00000095512  | NA            | NA        | yellow    |
| ENSMUSG00000067344  | NA            | NA        | black     |
| ENSMUSG00000039176  | Polg          | 18975     | blue      |
| ENSMUSG00000017781  | Pitpna        | 18738     | blue      |
| ENSMUSG00000039178  | Tbc1d19       | 67249     | turquoise |
| ENSMUSG00000028710  | Atpaf1        | 230649    | turquoise |
| ENSMUSG00000045952  | NA            | NA        | blue      |
| ENSMUSG000000103979 | NA            | NA        | turquoise |
| ENSMUSG00000052681  | Rap1b         | 215449    | blue      |
| ENSMUSG00000085007  | Gm11549       | 100503068 | grey60    |
| ENSMUSG00000035443  | Thyn1         | 77862     | turquoise |
| ENSMUSG00000052684  | Jun           | 16476     | blue      |
| ENSMUSG00000028718  | Stil          | 20460     | magenta   |
| ENSMUSG00000070343  | NA            | NA        | black     |
| ENSMUSG00000028719  | NA            | NA        | blue      |
| ENSMUSG00000020780  | Srp68         | 217337    | blue      |
| ENSMUSG00000020781  | Tsen54        | 76265     | grey60    |
| ENSMUSG00000042178  | Armc5         | 233912    | blue      |
| ENSMUSG00000018209  | Stk4          | 58231     | green     |
| ENSMUSG00000020783  | NA            | NA        | blue      |
| ENSMUSG00000070348  | Ccnd1         | 12443     | green     |
| ENSMUSG00000031711  | Zfp330        | 30932     | turquoise |
| ENSMUSG00000003546  | Klc4          | 74764     | turquoise |
| ENSMUSG00000031714  | Gab1          | 14388     | turquoise |
| ENSMUSG00000031715  | NA            | NA        | cyan      |
| ENSMUSG00000021203  | Otub2         | 68149     | lightcyan |
| ENSMUSG00000010277  | 2610507B11Rik | 72503     | turquoise |
| ENSMUSG00000003549  | Ercc1         | 13870     | turquoise |
| ENSMUSG00000095280  | NA            | NA        | turquoise |
| ENSMUSG00000038990  | Cables2       | 252966    | yellow    |
| ENSMUSG00000038991  | Txndc5        | 105245    | yellow    |
| ENSMUSG00000028480  | Glipr2        | 384009    | turquoise |
| ENSMUSG00000095288  | NA            | NA        | tan       |
| ENSMUSG00000049922  | Slc35c1       | 228368    | brown     |
| ENSMUSG00000028483  | Snopc3        | 77634     | turquoise |
| ENSMUSG00000039410  | Prdm16        | 70673     | brown     |
| ENSMUSG00000028484  | Psip1         | 101739    | black     |
| ENSMUSG00000063382  | Bcl9l         | 80288     | turquoise |
| ENSMUSG00000039414  | Heatr5b       | 320473    | turquoise |
| ENSMUSG00000028488  | Sh3gl2        | 20404     | turquoise |
| ENSMUSG00000049929  | Lpar4         | 78134     | turquoise |

|                    |          |        |             |
|--------------------|----------|--------|-------------|
| ENSMUSG00000024750 | NA       | NA     | brown       |
| ENSMUSG00000081043 | NA       | NA     | turquoise   |
| ENSMUSG00000100432 | NA       | NA     | turquoise   |
| ENSMUSG00000081046 | NA       | NA     | turquoise   |
| ENSMUSG00000024754 | Tmem2    | 83921  | red         |
| ENSMUSG00000041995 | Zbed3    | 72114  | red         |
| ENSMUSG00000031482 | Slc25a15 | 18408  | cyan        |
| ENSMUSG00000031483 | Erlin2   | 244373 | turquoise   |
| ENSMUSG00000042410 | Agps     | 228061 | brown       |
| ENSMUSG00000014243 | Zswim7   | 69747  | turquoise   |
| ENSMUSG00000041997 | Tlk1     | 228012 | turquoise   |
| ENSMUSG00000081049 | NA       | NA     | black       |
| ENSMUSG00000031485 | Prosc    | 114863 | brown       |
| ENSMUSG00000024758 | Rtn3     | 20168  | blue        |
| ENSMUSG00000014245 | NA       | NA     | turquoise   |
| ENSMUSG00000052926 | Rnaseh2a | 69724  | brown       |
| ENSMUSG00000024759 | Atl3     | 109168 | turquoise   |
| ENSMUSG00000031487 | Brf2     | 66653  | turquoise   |
| ENSMUSG00000052928 | Ctif     | 269037 | blue        |
| ENSMUSG00000099250 | Rn7s2    | 103949 | turquoise   |
| ENSMUSG00000000001 | Gnai3    | 14679  | green       |
| ENSMUSG00000049690 | Nckap5   | 210356 | yellow      |
| ENSMUSG00000010517 | Faf1     | 14084  | blue        |
| ENSMUSG00000039182 | AW209491 | 105351 | turquoise   |
| ENSMUSG00000039183 | Nubp2    | 26426  | blue        |
| ENSMUSG00000084593 | NA       | NA     | brown       |
| ENSMUSG00000039187 | Fanci    | 208836 | salmon      |
| ENSMUSG00000095524 | NA       | NA     | turquoise   |
| ENSMUSG00000103986 | NA       | NA     | yellow      |
| ENSMUSG00000095526 | NA       | NA     | blue        |
| ENSMUSG00000045962 | Wnk1     | 232341 | turquoise   |
| ENSMUSG00000074088 | Snrnp40  | 66585  | salmon      |
| ENSMUSG00000080860 | NA       | NA     | greenyellow |
| ENSMUSG00000035455 | Figl1    | 60530  | salmon      |
| ENSMUSG00000045969 | Ing1     | 26356  | turquoise   |
| ENSMUSG00000052698 | Tln2     | 70549  | blue        |
| ENSMUSG00000042185 | Nfrkb    | 235134 | blue        |
| ENSMUSG00000028729 | Ebna1bp2 | 69072  | green       |
| ENSMUSG00000018217 | Pmp22    | 18858  | yellow      |
| ENSMUSG00000020790 | Ankfy1   | 11736  | brown       |
| ENSMUSG00000020792 | Exoc7    | 53413  | turquoise   |
| ENSMUSG00000020794 | Ube2g1   | 67128  | turquoise   |
| ENSMUSG00000053119 | Chmp3    | 66700  | blue        |
| ENSMUSG00000031723 | Txn14b   | 234723 | turquoise   |
| ENSMUSG00000003559 | As3mt    | 57344  | turquoise   |
| ENSMUSG00000021215 | Net1     | 56349  | cyan        |
| ENSMUSG00000031728 | Zfp821   | 75871  | blue        |
| ENSMUSG00000031729 | Ist1     | 71955  | turquoise   |
| ENSMUSG00000107950 | NA       | NA     | tan         |
| ENSMUSG00000021218 | Gdi2     | 14569  | turquoise   |
| ENSMUSG00000107951 | NA       | NA     | tan         |
| ENSMUSG00000021219 | Rgs6     | 50779  | blue        |
| ENSMUSG00000049932 | H2afx    | 15270  | purple      |
| ENSMUSG00000028494 | Plin2    | 11520  | turquoise   |

|                     |               |        |             |
|---------------------|---------------|--------|-------------|
| ENSMUSG00000084830  | NA            | NA     | brown       |
| ENSMUSG00000028495  | NA            | NA     | black       |
| ENSMUSG00000028496  | Mlt3          | 70122  | green       |
| ENSMUSG00000091561  | NA            | NA     | greenyellow |
| ENSMUSG00000046152  | Fut10         | 171167 | yellow      |
| ENSMUSG00000028497  | Hacd4         | 66775  | yellow      |
| ENSMUSG00000056666  | Retsat        | 67442  | turquoise   |
| ENSMUSG00000039427  | Alg1          | 208211 | turquoise   |
| ENSMUSG00000081051  | NA            | NA     | black       |
| ENSMUSG000000100441 | NA            | NA     | tan         |
| ENSMUSG00000039428  | Tmem135       | 72759  | turquoise   |
| ENSMUSG00000084838  | NA            | NA     | red         |
| ENSMUSG00000024761  | NA            | NA     | turquoise   |
| ENSMUSG00000031490  | Eif4ebp1      | 13685  | pink        |
| ENSMUSG00000081056  | NA            | NA     | greenyellow |
| ENSMUSG00000024764  | Naa40         | 70999  | blue        |
| ENSMUSG00000081059  | NA            | NA     | turquoise   |
| ENSMUSG00000052934  | Fbxo31        | 76454  | blue        |
| ENSMUSG00000024767  | Otub1         | 107260 | blue        |
| ENSMUSG00000042423  | Fbrs          | 14123  | turquoise   |
| ENSMUSG000000108142 | NA            | NA     | yellow      |
| ENSMUSG00000039191  | Rbpj          | 19664  | green       |
| ENSMUSG00000039194  | Rlbp1         | 19771  | blue        |
| ENSMUSG00000039195  | 1110008P14Rik | 73737  | green       |
| ENSMUSG00000074092  | NA            | NA     | blue        |
| ENSMUSG00000039197  | Adk           | 11534  | turquoise   |
| ENSMUSG00000067365  | Tmem128       | 66309  | blue        |
| ENSMUSG00000074093  | Svip          | 75744  | yellow      |
| ENSMUSG00000039199  | Zdhc1         | 70796  | turquoise   |
| ENSMUSG00000085024  | C230035I16Rik | 320842 | turquoise   |
| ENSMUSG00000067369  | Trmt2b        | 215201 | blue        |
| ENSMUSG00000045973  | Slc25a51      | 230125 | salmon      |
| ENSMUSG00000080870  | NA            | NA     | greenyellow |
| ENSMUSG00000045975  | C2cd2         | 207781 | brown       |
| ENSMUSG00000085028  | Slc2a4rg-ps   | 329584 | blue        |
| ENSMUSG00000063632  | Sox11         | 20666  | red         |
| ENSMUSG00000056904  | NA            | NA     | red         |
| ENSMUSG000000104418 | NA            | NA     | blue        |
| ENSMUSG00000028737  | Aldh4a1       | 212647 | turquoise   |
| ENSMUSG00000091803  | Cox16         | 66272  | brown       |
| ENSMUSG00000080877  | NA            | NA     | pink        |
| ENSMUSG00000035469  | Rcbtb1        | 71330  | green       |
| ENSMUSG00000042197  | Zfp451        | 98403  | green       |
| ENSMUSG00000042198  | Chchd7        | 66433  | turquoise   |
| ENSMUSG00000031730  | Dhodh         | 56749  | blue        |
| ENSMUSG00000010290  | A1597479      | 98404  | blue        |
| ENSMUSG00000053128  | Rnf26         | 213211 | red         |
| ENSMUSG00000031731  | Ap1g1         | 11765  | red         |
| ENSMUSG00000031732  | Phlpp2        | 244650 | turquoise   |
| ENSMUSG00000021222  | Dcaf4         | 73828  | green       |
| ENSMUSG00000021224  | Numb          | 18222  | turquoise   |
| ENSMUSG00000021226  | Acot2         | 171210 | green       |
| ENSMUSG000000107962 | NA            | NA     | yellow      |
| ENSMUSG00000049940  | Pgrmc2        | 70804  | turquoise   |

|                    |               |           |              |
|--------------------|---------------|-----------|--------------|
| ENSMUSG00000107968 | NA            | NA        | pink         |
| ENSMUSG00000056673 | NA            | NA        | brown        |
| ENSMUSG00000046160 | Olig1         | 50914     | yellow       |
| ENSMUSG00000091570 | NA            | NA        | pink         |
| ENSMUSG00000084846 | NA            | NA        | yellow       |
| ENSMUSG00000056679 | Gpr173        | 70771     | turquoise    |
| ENSMUSG00000067608 | NA            | NA        | salmon       |
| ENSMUSG00000024772 | Ehd1          | 13660     | midnightblue |
| ENSMUSG00000100454 | NA            | NA        | turquoise    |
| ENSMUSG00000024773 | Atg2a         | 329015    | turquoise    |
| ENSMUSG00000052942 | NA            | NA        | turquoise    |
| ENSMUSG00000081067 | NA            | NA        | turquoise    |
| ENSMUSG00000024776 | Stambpl1      | 76630     | blue         |
| ENSMUSG00000024777 | Ppp2r5b       | 225849    | green        |
| ENSMUSG00000035704 | Alg8          | 381903    | blue         |
| ENSMUSG00000052949 | Rnf157        | 217340    | red          |
| ENSMUSG00000070604 | Vsig10l       | 75690     | turquoise    |
| ENSMUSG00000042439 | Zfp532        | 328977    | brown        |
| ENSMUSG00000108152 | NA            | NA        | turquoise    |
| ENSMUSG00000003808 | Farsa         | 66590     | greenyellow  |
| ENSMUSG00000003809 | Gcdh          | 270076    | brown        |
| ENSMUSG00000010538 | Tsacc         | 76927     | turquoise    |
| ENSMUSG00000000028 | Cdc45         | 12544     | magenta      |
| ENSMUSG00000078300 | NA            | NA        | greenyellow  |
| ENSMUSG00000045980 | Tmem104       | 320534    | turquoise    |
| ENSMUSG00000067377 | Tspan6        | 56496     | brown        |
| ENSMUSG00000028741 | Mrto4         | 69902     | red          |
| ENSMUSG00000045983 | Eif4g1        | 208643    | blue         |
| ENSMUSG00000078307 | A1593442      | 330941    | turquoise    |
| ENSMUSG00000078308 | NA            | NA        | turquoise    |
| ENSMUSG00000028743 | NA            | NA        | blue         |
| ENSMUSG00000028744 | Pqlc2         | 212555    | turquoise    |
| ENSMUSG00000085037 | 4933421O10Ril | 100504166 | turquoise    |
| ENSMUSG00000028745 | Capzb         | 12345     | midnightblue |
| ENSMUSG00000085039 | NA            | NA        | turquoise    |
| ENSMUSG00000046402 | Rbp1          | 19659     | blue         |
| ENSMUSG00000070371 | Prss36        | 77613     | turquoise    |
| ENSMUSG00000091811 | Inafm1        | 66300     | turquoise    |
| ENSMUSG00000080885 | NA            | NA        | pink         |
| ENSMUSG00000070372 | Capza1        | 12340     | blue         |
| ENSMUSG00000035476 | Tab3          | 66724     | turquoise    |
| ENSMUSG00000056917 | Sipa1         | 20469     | turquoise    |
| ENSMUSG00000046404 | NA            | NA        | blue         |
| ENSMUSG00000035478 | Mbd3          | 17192     | red          |
| ENSMUSG00000056919 | Cep162        | 382090    | brown        |
| ENSMUSG00000053134 | Supt7l        | 72195     | turquoise    |
| ENSMUSG00000018239 | Zcchc10       | 67966     | blue         |
| ENSMUSG00000053137 | Mapk11        | 19094     | green        |
| ENSMUSG00000091818 | NA            | NA        | brown        |
| ENSMUSG00000003573 | Homer3        | 26558     | grey60       |
| ENSMUSG00000081306 | NA            | NA        | green        |
| ENSMUSG00000003575 | Crtc1         | 382056    | turquoise    |
| ENSMUSG00000014504 | Srp19         | 66384     | midnightblue |
| ENSMUSG00000021234 | Fam161b       | 217705    | turquoise    |

|                    |         |        |             |
|--------------------|---------|--------|-------------|
| ENSMUSG00000021235 | Coq6    | 217707 | blue        |
| ENSMUSG00000031748 | Gnao1   | 14681  | red         |
| ENSMUSG00000021236 | Entpd5  | 12499  | yellow      |
| ENSMUSG00000031749 | St3gal2 | 20444  | turquoise   |
| ENSMUSG00000021238 | Aldh6a1 | 104776 | yellow      |
| ENSMUSG00000049950 | Rpp38   | 227522 | brown       |
| ENSMUSG00000091580 | NA      | NA     | brown       |
| ENSMUSG00000049957 | Ccdc137 | 67291  | turquoise   |
| ENSMUSG00000104199 | NA      | NA     | turquoise   |
| ENSMUSG00000057101 | Zfp180  | 210135 | blue        |
| ENSMUSG00000081070 | NA      | NA     | lightcyan   |
| ENSMUSG00000081071 | NA      | NA     | lightcyan   |
| ENSMUSG00000057103 | Cml1    | 66116  | green       |
| ENSMUSG00000024780 | NA      | NA     | turquoise   |
| ENSMUSG00000039449 | Prpf18  | 67229  | brown       |
| ENSMUSG00000024781 | Lipa    | 16889  | yellow      |
| ENSMUSG00000024782 | Ak3     | 56248  | turquoise   |
| ENSMUSG00000046179 | E2f8    | 108961 | magenta     |
| ENSMUSG00000081076 | NA      | NA     | tan         |
| ENSMUSG00000024785 | Rcl1    | 59028  | turquoise   |
| ENSMUSG00000081078 | NA      | NA     | red         |
| ENSMUSG00000025200 | Cwf1911 | 72502  | salmon      |
| ENSMUSG00000024787 | Snx15   | 69024  | turquoise   |
| ENSMUSG00000070610 | NA      | NA     | turquoise   |
| ENSMUSG00000025201 | NA      | NA     | greenyellow |
| ENSMUSG00000025203 | Scd2    | 20250  | purple      |
| ENSMUSG00000024789 | Jak2    | 16452  | turquoise   |
| ENSMUSG00000052957 | Gas1    | 14451  | brown       |
| ENSMUSG00000042444 | Fam63b  | 235461 | turquoise   |
| ENSMUSG00000025204 | Ndufb8  | 67264  | blue        |
| ENSMUSG00000042446 | Zmym4   | 67785  | brown       |
| ENSMUSG00000042447 | Mios    | 252875 | blue        |
| ENSMUSG00000025207 | Sema4g  | 26456  | turquoise   |
| ENSMUSG00000003810 | Mast2   | 17776  | blue        |
| ENSMUSG00000025208 | Mrpl43  | 94067  | green       |
| ENSMUSG00000025209 | Peo1    | 226153 | green       |
| ENSMUSG00000003812 | Dnase2a | 13423  | turquoise   |
| ENSMUSG00000003813 | Rad23a  | 19358  | brown       |
| ENSMUSG00000003814 | Calr    | 12317  | turquoise   |
| ENSMUSG00000104434 | NA      | NA     | tan         |
| ENSMUSG00000078317 | F8a     | 14070  | turquoise   |
| ENSMUSG00000045994 | B3gat1  | 76898  | turquoise   |
| ENSMUSG00000045996 | Polr2k  | 17749  | blue        |
| ENSMUSG00000046411 | NA      | NA     | pink        |
| ENSMUSG00000080893 | NA      | NA     | brown       |
| ENSMUSG00000028756 | Pink1   | 68943  | turquoise   |
| ENSMUSG00000028757 | Ddost   | 13200  | brown       |
| ENSMUSG00000080896 | NA      | NA     | blue        |
| ENSMUSG00000028759 | Hp1bp3  | 15441  | black       |
| ENSMUSG00000091825 | NA      | NA     | lightcyan   |
| ENSMUSG00000100701 | NA      | NA     | brown       |
| ENSMUSG00000046417 | Lrrc75a | 192976 | turquoise   |
| ENSMUSG00000080899 | NA      | NA     | turquoise   |
| ENSMUSG00000003581 | Rnf215  | 71673  | purple      |

|                    |               |           |              |
|--------------------|---------------|-----------|--------------|
| ENSMUSG00000063659 | Zbtb18        | 30928     | blue         |
| ENSMUSG00000031751 | Amfr          | 23802     | turquoise    |
| ENSMUSG00000021240 | Abcd4         | 19300     | turquoise    |
| ENSMUSG00000031753 | Cog4          | 102339    | green        |
| ENSMUSG00000021241 | Isca2         | 74316     | turquoise    |
| ENSMUSG00000031754 | NA            | NA        | red          |
| ENSMUSG00000021242 | Npc2          | 67963     | midnightblue |
| ENSMUSG00000031755 | Bbs2          | 67378     | turquoise    |
| ENSMUSG00000021243 | Fcf1          | 73736     | turquoise    |
| ENSMUSG00000031756 | Cenpn         | 72155     | magenta      |
| ENSMUSG00000021244 | Ylpm1         | 56531     | blue         |
| ENSMUSG00000021245 | Mlh3          | 217716    | turquoise    |
| ENSMUSG00000021248 | Tmed10        | 68581     | brown        |
| ENSMUSG00000049960 | Mrps16        | 66242     | black        |
| ENSMUSG00000039450 | Dcxr          | 67880     | yellow       |
| ENSMUSG00000056692 | D17Wsu92e     | 224647    | green        |
| ENSMUSG00000039452 | Snx22         | 382083    | turquoise    |
| ENSMUSG00000057110 | Cntrl         | 26920     | blue         |
| ENSMUSG00000039456 | Morc3         | 338467    | pink         |
| ENSMUSG00000049969 | Plekhf2       | 71801     | blue         |
| ENSMUSG00000084866 | A930006K02Ril | 100503120 | turquoise    |
| ENSMUSG00000081081 | NA            | NA        | yellow       |
| ENSMUSG00000056698 | Elmod3        | 232089    | yellow       |
| ENSMUSG00000039458 | Mtmr12        | 268783    | greenyellow  |
| ENSMUSG00000057113 | Npm1          | 18148     | black        |
| ENSMUSG00000024790 | Sac3d1        | 66406     | red          |
| ENSMUSG00000024791 | Cdca5         | 67849     | magenta      |
| ENSMUSG00000024792 | Zfpl1         | 81909     | turquoise    |
| ENSMUSG00000067629 | Syngap1       | 240057    | turquoise    |
| ENSMUSG00000074358 | Ccdc61        | 232933    | blue         |
| ENSMUSG00000092014 | NA            | NA        | turquoise    |
| ENSMUSG00000081087 | NA            | NA        | black        |
| ENSMUSG00000052962 | Mrpl35        | 66223     | red          |
| ENSMUSG00000024795 | Kif20b        | 240641    | magenta      |
| ENSMUSG00000024797 | Vps51         | 68505     | brown        |
| ENSMUSG00000025212 | Sfxn3         | 94280     | turquoise    |
| ENSMUSG00000035725 | Prkx          | 19108     | brown        |
| ENSMUSG00000024799 | Tm7sf2        | 73166     | blue         |
| ENSMUSG00000035726 | Supt16        | 114741    | red          |
| ENSMUSG00000025217 | Btrc          | 12234     | green        |
| ENSMUSG00000025218 | Poll          | 56626     | brown        |
| ENSMUSG00000003824 | Syce2         | 71846     | magenta      |
| ENSMUSG00000010554 | NA            | NA        | red          |
| ENSMUSG00000095562 | NA            | NA        | pink         |
| ENSMUSG00000028760 | Eif4g3        | 230861    | yellow       |
| ENSMUSG00000085054 | NA            | NA        | turquoise    |
| ENSMUSG00000095567 | Noc2l         | 57741     | green        |
| ENSMUSG00000028766 | Alpl          | 11647     | turquoise    |
| ENSMUSG00000091831 | NA            | NA        | blue         |
| ENSMUSG00000063663 | Brwd3         | 382236    | turquoise    |
| ENSMUSG00000035495 | Tstd2         | 272027    | brown        |
| ENSMUSG00000056938 | Acbd4         | 67131     | turquoise    |
| ENSMUSG00000070394 | Tmem256       | 69186     | turquoise    |
| ENSMUSG00000053153 | Spag16        | 66722     | turquoise    |

|                    |               |           |              |
|--------------------|---------------|-----------|--------------|
| ENSMUSG00000031760 | Mt3           | 17751     | red          |
| ENSMUSG00000031762 | Mt2           | 17750     | blue         |
| ENSMUSG00000021250 | Fos           | 14281     | red          |
| ENSMUSG00000081329 | NA            | NA        | turquoise    |
| ENSMUSG00000021252 | 0610007P14Rik | 58520     | blue         |
| ENSMUSG00000031765 | Mt1           | 17748     | red          |
| ENSMUSG00000021253 | Tgfb3         | 21809     | turquoise    |
| ENSMUSG00000021254 | Gpatch2l      | 70373     | turquoise    |
| ENSMUSG00000021256 | NA            | NA        | cyan         |
| ENSMUSG00000021257 | Angel1        | 68737     | turquoise    |
| ENSMUSG00000107990 | NA            | NA        | yellow       |
| ENSMUSG00000021258 | Ccnk          | 12454     | pink         |
| ENSMUSG00000021259 | Cyp46a1       | 13116     | yellow       |
| ENSMUSG00000004018 | NA            | NA        | blue         |
| ENSMUSG00000108414 | NA            | NA        | turquoise    |
| ENSMUSG00000039461 | Tcta          | 102791    | red          |
| ENSMUSG00000039463 | Slc9a8        | 77031     | blue         |
| ENSMUSG00000084874 | NA            | NA        | turquoise    |
| ENSMUSG00000100481 | NA            | NA        | turquoise    |
| ENSMUSG00000081093 | NA            | NA        | blue         |
| ENSMUSG00000081094 | NA            | NA        | black        |
| ENSMUSG00000007564 | Ppp2r1a       | 51792     | green        |
| ENSMUSG00000042460 | NA            | NA        | turquoise    |
| ENSMUSG00000025220 | Mgea5         | 76055     | blue         |
| ENSMUSG00000081099 | NA            | NA        | turquoise    |
| ENSMUSG00000014294 | Ndufa2        | 17991     | midnightblue |
| ENSMUSG00000042462 | Dctpp1        | 66422     | salmon       |
| ENSMUSG00000063902 | NA            | NA        | midnightblue |
| ENSMUSG00000035735 | Dagla         | 269060    | yellow       |
| ENSMUSG00000025223 | Ldb1          | 16825     | turquoise    |
| ENSMUSG00000063904 | Dpp3          | 75221     | blue         |
| ENSMUSG00000025224 | Gbf1          | 107338    | pink         |
| ENSMUSG00000060121 | NA            | NA        | red          |
| ENSMUSG00000025226 | Fbxl15        | 68431     | turquoise    |
| ENSMUSG00000025228 | Actr1a        | 54130     | brown        |
| ENSMUSG00000060126 | NA            | NA        | black        |
| ENSMUSG00000070639 | NA            | NA        | grey60       |
| ENSMUSG00000060128 | NA            | NA        | red          |
| ENSMUSG00000108183 | NA            | NA        | tan          |
| ENSMUSG00000000056 | Narf          | 67608     | turquoise    |
| ENSMUSG00000104453 | NA            | NA        | yellow       |
| ENSMUSG00000028771 | Ptpn12        | 19248     | turquoise    |
| ENSMUSG00000028772 | NA            | NA        | green        |
| ENSMUSG00000056941 | Commd7        | 99311     | green        |
| ENSMUSG00000039701 | Usp53         | 99526     | turquoise    |
| ENSMUSG00000039703 | Nploc4        | 217365    | turquoise    |
| ENSMUSG00000085069 | Gm13111       | 100042178 | turquoise    |
| ENSMUSG00000039704 | NA            | NA        | turquoise    |
| ENSMUSG00000046432 | Ngfrap1       | 12070     | black        |
| ENSMUSG00000046434 | Hnrnpa1       | 15382     | red          |
| ENSMUSG00000028779 | Pef1          | 67898     | turquoise    |
| ENSMUSG00000100720 | NA            | NA        | red          |
| ENSMUSG00000081331 | NA            | NA        | turquoise    |
| ENSMUSG00000091845 | Gm4604        | 100043718 | tan          |



|                    |               |        |              |
|--------------------|---------------|--------|--------------|
| ENSMUSG00000031770 | Herpud1       | 64209  | blue         |
| ENSMUSG00000042700 | Sipa1l1       | 217692 | salmon       |
| ENSMUSG00000031774 | Fam192a       | 102122 | black        |
| ENSMUSG00000021262 | Evl           | 14026  | green        |
| ENSMUSG00000031776 | Arl2bp        | 107566 | green        |
| ENSMUSG00000021264 | Yy1           | 22632  | turquoise    |
| ENSMUSG00000042705 | Commd10       | 69456  | blue         |
| ENSMUSG00000021265 | Slc25a29      | 214663 | turquoise    |
| ENSMUSG00000021266 | Wars          | 22375  | green        |
| ENSMUSG00000042709 | Atpaf2        | 246782 | red          |
| ENSMUSG00000084881 | NA            | NA     | turquoise    |
| ENSMUSG00000039473 | Ubn1          | 170644 | turquoise    |
| ENSMUSG00000039474 | Wfs1          | 22393  | brown        |
| ENSMUSG00000057130 | NA            | NA     | green        |
| ENSMUSG00000084885 | 3010001F23Rik | 75693  | turquoise    |
| ENSMUSG00000039477 | Tnrc18        | 231861 | green        |
| ENSMUSG00000039478 | NA            | NA     | turquoise    |
| ENSMUSG00000057133 | Chd6          | 71389  | turquoise    |
| ENSMUSG00000057134 | Ado           | 211488 | black        |
| ENSMUSG00000007570 | Fance         | 72775  | turquoise    |
| ENSMUSG00000052981 | Ube2ql1       | 76980  | cyan         |
| ENSMUSG00000018500 | Adora2b       | 11541  | yellow       |
| ENSMUSG00000018501 | Ncor1         | 20185  | green        |
| ENSMUSG00000092035 | Peg10         | 170676 | turquoise    |
| ENSMUSG00000025231 | Sufu          | 24069  | blue         |
| ENSMUSG00000042472 | Zfp410        | 52708  | blue         |
| ENSMUSG00000025232 | Hexa          | 15211  | turquoise    |
| ENSMUSG00000025234 | Arih1         | 23806  | brown        |
| ENSMUSG00000070643 | Sox13         | 20668  | turquoise    |
| ENSMUSG00000025235 | Bbs4          | 102774 | turquoise    |
| ENSMUSG00000025236 | Adpgk         | 72141  | blue         |
| ENSMUSG00000018509 | Cenpv         | 73139  | magenta      |
| ENSMUSG00000025237 | Parp6         | 67287  | turquoise    |
| ENSMUSG00000025239 | Limd1         | 29806  | green        |
| ENSMUSG00000021500 | Ddx46         | 212880 | blue         |
| ENSMUSG00000021501 | Cam1          | 12328  | blue         |
| ENSMUSG00000003847 | Nfat5         | 54446  | yellow       |
| ENSMUSG00000003848 | Nob1          | 67619  | blue         |
| ENSMUSG00000021504 | B4galt7       | 218271 | turquoise    |
| ENSMUSG00000003849 | Nqo1          | 18104  | turquoise    |
| ENSMUSG00000021508 | Cxcl14        | 57266  | purple       |
| ENSMUSG00000095588 | NA            | NA     | midnightblue |
| ENSMUSG00000078348 | NA            | NA     | green        |
| ENSMUSG00000046440 | NA            | NA     | turquoise    |
| ENSMUSG00000028785 | Hpca          | 15444  | turquoise    |
| ENSMUSG00000046441 | Cmtr2         | 234728 | yellow       |
| ENSMUSG00000096006 | NA            | NA     | red          |
| ENSMUSG00000046442 | Ppm1e         | 320472 | pink         |
| ENSMUSG00000029201 | Ugdh          | 22235  | turquoise    |
| ENSMUSG00000029202 | Pds5a         | 71521  | blue         |
| ENSMUSG00000039715 | Wdr34         | 71820  | yellow       |
| ENSMUSG00000063684 | NA            | NA     | brown        |
| ENSMUSG00000028788 | Ptp4a2        | 19244  | black        |
| ENSMUSG00000039716 | Dock3         | 208869 | turquoise    |

|                    |          |        |             |
|--------------------|----------|--------|-------------|
| ENSMUSG00000029203 | Ube2k    | 53323  | green       |
| ENSMUSG00000028789 | Azin2    | 242669 | turquoise   |
| ENSMUSG00000053173 | NA       | NA     | black       |
| ENSMUSG00000046447 | Camk2n1  | 66259  | blue        |
| ENSMUSG00000029207 | Apbb2    | 11787  | yellow      |
| ENSMUSG00000081344 | NA       | NA     | black       |
| ENSMUSG00000029208 | Guf1     | 231279 | blue        |
| ENSMUSG00000064105 | Cnm2     | 94219  | yellow      |
| ENSMUSG00000031781 | Ciapi1   | 109006 | green       |
| ENSMUSG00000029209 | Gnpda2   | 67980  | turquoise   |
| ENSMUSG00000053178 | Mterf1b  | 208595 | blue        |
| ENSMUSG00000007812 | Zfp655   | 72611  | brown       |
| ENSMUSG00000031782 | Coq9     | 67914  | turquoise   |
| ENSMUSG00000021270 | Hsp90aa1 | 15519  | black       |
| ENSMUSG00000031783 | Polr2c   | 20021  | green       |
| ENSMUSG00000007815 | Rhoa     | 11848  | greenyellow |
| ENSMUSG00000031785 | Adgrg1   | 14766  | turquoise   |
| ENSMUSG00000042712 | Wbp5     | 22381  | red         |
| ENSMUSG00000004031 | Brinp2   | 240843 | turquoise   |
| ENSMUSG00000021273 | Fdft1    | 14137  | yellow      |
| ENSMUSG00000007817 | Zmiz1    | 328365 | green       |
| ENSMUSG00000004032 | Gstm5    | 14866  | red         |
| ENSMUSG00000031787 | Katnb1   | 74187  | red         |
| ENSMUSG00000021275 | Tecpr2   | 104859 | turquoise   |
| ENSMUSG00000014547 | Wdfy2    | 268752 | blue        |
| ENSMUSG00000031788 | Kifc3    | 16582  | turquoise   |
| ENSMUSG00000021276 | Cinp     | 67236  | green       |
| ENSMUSG00000004035 | Gstm7    | 68312  | turquoise   |
| ENSMUSG00000021277 | Traf3    | 22031  | blue        |
| ENSMUSG00000021279 | Cdc42bpb | 217866 | blue        |
| ENSMUSG00000042719 | Naa25    | 231713 | brown       |
| ENSMUSG00000039480 | Nt5dc1   | 319638 | turquoise   |
| ENSMUSG00000000305 | Cdh4     | 12561  | blue        |
| ENSMUSG00000108435 | NA       | NA     | grey60      |
| ENSMUSG00000039483 | NA       | NA     | turquoise   |
| ENSMUSG00000108438 | NA       | NA     | lightcyan   |
| ENSMUSG00000039485 | Tspyl4   | 72480  | turquoise   |
| ENSMUSG00000067653 | Ankrd23  | 78321  | turquoise   |
| ENSMUSG00000057147 | Dph6     | 66632  | blue        |
| ENSMUSG00000025240 | Sacm1l   | 83493  | turquoise   |
| ENSMUSG00000025241 | Fyco1    | 17281  | brown       |
| ENSMUSG00000035754 | Wdr18    | 216156 | blue        |
| ENSMUSG00000053411 | Cbx7     | 52609  | turquoise   |
| ENSMUSG00000052997 | Uba2     | 50995  | black       |
| ENSMUSG00000035757 | Selo     | 223776 | turquoise   |
| ENSMUSG00000007589 | Tinf2    | 28113  | blue        |
| ENSMUSG00000025245 | Lztf1l   | 93730  | blue        |
| ENSMUSG00000053414 | Hunk     | 26559  | turquoise   |
| ENSMUSG00000042487 | Leo1     | 235497 | blue        |
| ENSMUSG00000025246 | Tbl1x    | 21372  | green       |
| ENSMUSG00000060143 | NA       | NA     | black       |
| ENSMUSG00000042489 | Clspn    | 269582 | magenta     |
| ENSMUSG00000060147 | Serpib6a | 20719  | turquoise   |
| ENSMUSG00000021510 | Zfp729a  | 212281 | turquoise   |

|                    |          |        |              |
|--------------------|----------|--------|--------------|
| ENSMUSG00000060149 | BC002059 | 213811 | brown        |
| ENSMUSG00000021514 | Zfp369   | 170936 | turquoise    |
| ENSMUSG00000021518 | Ptdss1   | 19210  | turquoise    |
| ENSMUSG00000000078 | Klf6     | 23849  | turquoise    |
| ENSMUSG00000021519 | Mterf3   | 66410  | turquoise    |
| ENSMUSG00000095595 | Fam177a  | 73385  | greenyellow  |
| ENSMUSG00000028790 | Khdrbs1  | 20218  | red          |
| ENSMUSG00000095597 | NA       | NA     | black        |
| ENSMUSG00000028792 | Ak2      | 11637  | brown        |
| ENSMUSG00000056962 | Jmjd6    | 107817 | blue         |
| ENSMUSG00000096014 | Sox1     | 20664  | black        |
| ENSMUSG00000028795 | Ccdc28b  | 66264  | turquoise    |
| ENSMUSG00000028796 | Phc2     | 54383  | turquoise    |
| ENSMUSG00000029211 | Gabra4   | 14397  | turquoise    |
| ENSMUSG00000028797 | NA       | NA     | brown        |
| ENSMUSG00000029212 | Gabrb1   | 14400  | red          |
| ENSMUSG00000039725 | Trp53rka | 381406 | turquoise    |
| ENSMUSG00000063694 | Cycs     | 13063  | brown        |
| ENSMUSG00000028798 | Eif3i    | 54709  | red          |
| ENSMUSG00000018286 | NA       | NA     | brown        |
| ENSMUSG00000029213 | Commd8   | 27784  | brown        |
| ENSMUSG00000028799 | Zfp362   | 230761 | blue         |
| ENSMUSG00000081350 | NA       | NA     | turquoise    |
| ENSMUSG00000018287 | Spag7    | 216873 | red          |
| ENSMUSG00000063696 | NA       | NA     | black        |
| ENSMUSG00000081352 | NA       | NA     | greenyellow  |
| ENSMUSG00000063698 | NA       | NA     | yellow       |
| ENSMUSG00000091866 | NA       | NA     | blue         |
| ENSMUSG00000031790 | Mmp15    | 17388  | blue         |
| ENSMUSG00000064115 | Cadm2    | 239857 | red          |
| ENSMUSG00000031791 | Tmem38a  | 74166  | turquoise    |
| ENSMUSG00000014550 | Rbsn     | 78287  | brown        |
| ENSMUSG00000031792 | Usb1     | 101985 | green        |
| ENSMUSG00000014551 | Mrps25   | 64658  | green        |
| ENSMUSG00000074629 | NA       | NA     | turquoise    |
| ENSMUSG00000004040 | Stat3    | 20848  | turquoise    |
| ENSMUSG00000081359 | NA       | NA     | brown        |
| ENSMUSG00000021282 | Eif5     | 217869 | midnightblue |
| ENSMUSG00000014554 | Dguok    | 27369  | green        |
| ENSMUSG00000031796 | Cfap20   | 14894  | brown        |
| ENSMUSG00000007827 | Ankrd26  | 232339 | blue         |
| ENSMUSG00000004043 | Stat5a   | 20850  | brown        |
| ENSMUSG00000021285 | Ppp1r13b | 21981  | yellow       |
| ENSMUSG00000032212 | Sltm     | 66660  | blue         |
| ENSMUSG00000021286 | Zfyve21  | 68520  | turquoise    |
| ENSMUSG00000031799 | Tpm4     | 326618 | blue         |
| ENSMUSG00000042726 | Trafd1   | 231712 | brown        |
| ENSMUSG00000021287 | Xrcc3    | 74335  | turquoise    |
| ENSMUSG00000021288 | Klc1     | 16593  | green        |
| ENSMUSG00000032215 | Rsl24d1  | 225215 | blue         |
| ENSMUSG00000042729 | Wdr74    | 107071 | green        |
| ENSMUSG00000032216 | Nedd4    | 17999  | midnightblue |
| ENSMUSG00000032217 | Rnf111   | 93836  | green        |
| ENSMUSG00000032218 | Ccnb2    | 12442  | magenta      |

|                    |    |    |       |
|--------------------|----|----|-------|
| ENSMUSG00000108442 | NA | NA | black |
|--------------------|----|----|-------|

**Table S2 DVC genes (TAPs vs NSCs)**

| EnsembleID         | Symbol        | GeneID | Module      | STS         |
|--------------------|---------------|--------|-------------|-------------|
| ENSMUSG00000024620 | Pdgfrb        | 18596  | purple      | 7.526899761 |
| ENSMUSG00000031639 | Tlr3          | 142980 | purple      | 7.303228857 |
| ENSMUSG00000035104 | Eva1a         | 232146 | purple      | 6.907269754 |
| ENSMUSG00000021508 | Cxcl14        | 57266  | purple      | 6.899705582 |
| ENSMUSG00000026202 | Tuba4a        | 22145  | purple      | 6.873564718 |
| ENSMUSG00000020805 | Slc13a5       | 237831 | purple      | 6.834530659 |
| ENSMUSG00000027221 | Chst1         | 76969  | purple      | 6.830977846 |
| ENSMUSG00000059336 | Slc14a1       | 108052 | purple      | 6.814200287 |
| ENSMUSG00000031610 | Scrg1         | 20284  | purple      | 6.767722176 |
| ENSMUSG00000022763 | Aifm3         | 72168  | purple      | 6.73444379  |
| ENSMUSG00000020614 | Fam20a        | 208659 | purple      | 6.690836486 |
| ENSMUSG00000039519 | Cyp7b1        | 13123  | purple      | 6.6733971   |
| ENSMUSG00000053004 | Hrh1          | 15465  | purple      | 6.662663268 |
| ENSMUSG00000097348 | Rmst          | 110333 | black       | 6.629253392 |
| ENSMUSG00000020828 | Pld2          | 18806  | greenyellow | 6.609169439 |
| ENSMUSG00000023367 | Tmem176a      | 66058  | purple      | 6.597383185 |
| ENSMUSG00000063558 | Aox1          | 11761  | purple      | 6.596137332 |
| ENSMUSG00000001260 | Gabrg1        | 14405  | purple      | 6.548164346 |
| ENSMUSG00000021613 | Hapln1        | 12950  | purple      | 6.535031848 |
| ENSMUSG00000007872 | NA            | NA     | purple      | 6.533623582 |
| ENSMUSG00000024486 | Hbegf         | 15200  | purple      | 6.516476707 |
| ENSMUSG00000024140 | Epas1         | 13819  | red         | 6.512103651 |
| ENSMUSG00000022018 | Rgcc          | 66214  | black       | 6.509556985 |
| ENSMUSG00000015085 | Entpd2        | 12496  | red         | 6.424046162 |
| ENSMUSG00000003974 | Grm3          | 108069 | purple      | 6.420572765 |
| ENSMUSG00000020734 | Grin2c        | 14813  | purple      | 6.418950274 |
| ENSMUSG00000002475 | Abhd3         | 106861 | purple      | 6.381837445 |
| ENSMUSG00000021750 | Fam107a       | 268709 | red         | 6.347500237 |
| ENSMUSG00000033998 | Kcnk1         | 16525  | purple      | 6.342882465 |
| ENSMUSG00000086155 | 9430041J12Rik | 77323  | black       | 6.309558103 |
| ENSMUSG00000034353 | Ramp1         | 51801  | purple      | 6.303187136 |
| ENSMUSG00000061740 | Cyp2d22       | 56448  | purple      | 6.289442644 |
| ENSMUSG00000096054 | Syne1         | 64009  | purple      | 6.282673164 |
| ENSMUSG00000036949 | Slc39a12      | 277468 | purple      | 6.257583618 |
| ENSMUSG00000035237 | Lcat          | 16816  | purple      | 6.2532535   |
| ENSMUSG00000038094 | Atp13a4       | 224079 | purple      | 6.243844396 |
| ENSMUSG00000025537 | Phkg1         | 18682  | black       | 6.220889988 |
| ENSMUSG00000053702 | Nebi          | 74103  | purple      | 6.216062367 |
| ENSMUSG00000076441 | Ass1          | 11898  | greenyellow | 6.214584471 |
| ENSMUSG00000060961 | Slc4a4        | 54403  | purple      | 6.192511145 |
| ENSMUSG00000024411 | Aqp4          | 11829  | purple      | 6.17632823  |
| ENSMUSG00000014361 | Mertk         | 17289  | purple      | 6.152812719 |
| ENSMUSG00000024227 | Pdzph1        | 69239  | blue        | 6.123382152 |
| ENSMUSG00000037348 | Paqr7         | 71904  | black       | 6.119760598 |
| ENSMUSG00000029108 | Pcdh7         | 54216  | purple      | 6.097809383 |
| ENSMUSG00000036585 | Fgf1          | 14164  | greenyellow | 6.036341499 |
| ENSMUSG00000039157 | Fam102a       | 98952  | turquoise   | 5.969052692 |
| ENSMUSG00000022112 | Gpc5          | 103978 | purple      | 5.948813143 |
| ENSMUSG00000026986 | Hnmt          | 140483 | blue        | 5.948272567 |
| ENSMUSG00000044197 | Gpr146        | 80290  | purple      | 5.904564967 |
| ENSMUSG00000072941 | NA            | NA     | yellow      | 5.866492209 |

|                     |               |    |        |              |             |
|---------------------|---------------|----|--------|--------------|-------------|
| ENSMUSG00000055003  | Lrtm2         |    | 211187 | yellow       | 5.859839218 |
| ENSMUSG00000067279  | Ppp1r3c       |    | 53412  | blue         | 5.831421602 |
| ENSMUSG00000032702  | Kank1         |    | 107351 | green        | 5.825686021 |
| ENSMUSG00000039239  | Tgfb2         |    | 21808  | greenyellow  | 5.816950174 |
| ENSMUSG00000030495  | Slc7a10       |    | 53896  | red          | 5.806763981 |
| ENSMUSG00000073424  | Cyp4f15       |    | 106648 | black        | 5.759869322 |
| ENSMUSG00000027560  | Dok5          |    | 76829  | turquoise    | 5.748111086 |
| ENSMUSG00000040289  | Hey1          |    | 15213  | blue         | 5.713559552 |
| ENSMUSG00000019232  | NA            | NA |        | greenyellow  | 5.706568071 |
| ENSMUSG00000001773  | Folh1         |    | 53320  | yellow       | 5.702885816 |
| ENSMUSG00000079057  | NA            | NA |        | turquoise    | 5.693297777 |
| ENSMUSG00000030235  | Slco1c1       |    | 58807  | purple       | 5.690357711 |
| ENSMUSG00000056666  | Retsat        |    | 67442  | turquoise    | 5.680014692 |
| ENSMUSG00000053279  | Aldh1a1       |    | 11668  | yellow       | 5.667932307 |
| ENSMUSG00000000794  | NA            | NA |        | yellow       | 5.662142105 |
| ENSMUSG00000050423  | Ppp1r3g       |    | 76487  | yellow       | 5.600406898 |
| ENSMUSG00000033174  | Mgl1          |    | 23945  | red          | 5.596812192 |
| ENSMUSG00000026173  | Plcd4         |    | 18802  | black        | 5.572097597 |
| ENSMUSG00000071424  | NA            | NA |        | yellow       | 5.556766646 |
| ENSMUSG00000064373  | Sepp1         |    | 20363  | purple       | 5.540634631 |
| ENSMUSG00000040055  | Gjb6          |    | 14623  | purple       | 5.539083917 |
| ENSMUSG00000015766  | Eps8          |    | 13860  | yellow       | 5.53146789  |
| ENSMUSG00000030256  | Bhlhe41       |    | 79362  | red          | 5.525325108 |
| ENSMUSG00000042073  | Abhd14b       |    | 76491  | blue         | 5.503851672 |
| ENSMUSG00000024810  | Ii33          |    | 77125  | green        | 5.490049518 |
| ENSMUSG00000025407  | Gli1          |    | 14632  | green        | 5.489013752 |
| ENSMUSG000000097520 | NA            | NA |        | yellow       | 5.473917206 |
| ENSMUSG00000022893  | Adamts1       |    | 11504  | turquoise    | 5.455636023 |
| ENSMUSG00000040690  | Col16a1       |    | 107581 | blue         | 5.424907141 |
| ENSMUSG00000024339  | NA            | NA |        | yellow       | 5.416137714 |
| ENSMUSG00000021219  | Rgs6          |    | 50779  | blue         | 5.412637369 |
| ENSMUSG00000091387  | Gcnt4         |    | 218476 | blue         | 5.400044712 |
| ENSMUSG00000028064  | Sema4a        |    | 20351  | greenyellow  | 5.381457909 |
| ENSMUSG00000023826  | Park2         |    | 50873  | turquoise    | 5.376238072 |
| ENSMUSG00000097296  | NA            | NA |        | yellow       | 5.375092156 |
| ENSMUSG00000023913  | Pla2g7        |    | 27226  | purple       | 5.339906823 |
| ENSMUSG00000040260  | Daam2         |    | 76441  | purple       | 5.339290385 |
| ENSMUSG00000029084  | Cd38          |    | 12494  | yellow       | 5.331324641 |
| ENSMUSG00000096687  | NA            | NA |        | turquoise    | 5.321298069 |
| ENSMUSG00000028927  | Padi2         |    | 18600  | turquoise    | 5.293798317 |
| ENSMUSG00000030287  | Itpr2         |    | 16439  | midnightblue | 5.238534253 |
| ENSMUSG00000048939  | Atp13a5       |    | 268878 | yellow       | 5.236044291 |
| ENSMUSG00000029162  | Khk           |    | 16548  | turquoise    | 5.22882906  |
| ENSMUSG00000016194  | Hsd11b1       |    | 15483  | purple       | 5.220127431 |
| ENSMUSG00000006205  | Htra1         |    | 56213  | red          | 5.207632168 |
| ENSMUSG00000039620  | 6430573F11Rik |    | 319582 | blue         | 5.206133901 |
| ENSMUSG00000079494  | Cml5          |    | 69049  | yellow       | 5.192410221 |
| ENSMUSG00000037010  | Apln          |    | 30878  | yellow       | 5.172989573 |
| ENSMUSG00000040181  | Fmo1          |    | 14261  | yellow       | 5.13097375  |
| ENSMUSG00000066026  | Dhrs3         |    | 20148  | yellow       | 5.129283488 |
| ENSMUSG00000100768  | NA            | NA |        | greenyellow  | 5.122251325 |
| ENSMUSG00000017390  | Aldoc         |    | 11676  | red          | 5.108803911 |
| ENSMUSG00000044788  | NA            | NA |        | yellow       | 5.108360678 |
| ENSMUSG00000039037  | NA            | NA |        | turquoise    | 5.07567586  |

|                    |               |    |           |             |             |
|--------------------|---------------|----|-----------|-------------|-------------|
| ENSMUSG00000032194 | Kank2         |    | 235041    | yellow      | 5.074915925 |
| ENSMUSG00000049690 | Nckap5        |    | 210356    | yellow      | 5.053612324 |
| ENSMUSG00000023206 | Ii15ra        |    | 16169     | turquoise   | 5.053481934 |
| ENSMUSG00000032649 | Colgalt2      |    | 269132    | brown       | 5.047870762 |
| ENSMUSG00000073889 | Ii11ra1       |    | 16157     | turquoise   | 5.045381041 |
| ENSMUSG00000043629 | 1700019D03Rik |    | 67080     | turquoise   | 4.99247796  |
| ENSMUSG00000031283 | Chrdl1        |    | 83453     | blue        | 4.980262557 |
| ENSMUSG00000055737 | Ghr           |    | 14600     | yellow      | 4.968056418 |
| ENSMUSG00000028195 | Cyr61         |    | 16007     | yellow      | 4.963705938 |
| ENSMUSG00000052769 | NA            | NA |           | turquoise   | 4.950092069 |
| ENSMUSG00000067242 | NA            | NA |           | yellow      | 4.949427333 |
| ENSMUSG00000022037 | Clu           |    | 12759     | red         | 4.916083712 |
| ENSMUSG00000032942 | Ucp3          |    | 22229     | yellow      | 4.878578724 |
| ENSMUSG00000104453 | NA            | NA |           | yellow      | 4.865370182 |
| ENSMUSG00000051497 | Kcnj16        |    | 16517     | yellow      | 4.805390418 |
| ENSMUSG00000052942 | NA            | NA |           | turquoise   | 4.785101693 |
| ENSMUSG00000016128 | Stard13       |    | 243362    | turquoise   | 4.738067512 |
| ENSMUSG00000046434 | Hnrnpa1       |    | 15382     | red         | 4.703699685 |
| ENSMUSG00000025586 | Cpeb1         |    | 12877     | turquoise   | 4.686034936 |
| ENSMUSG00000051041 | Olfml1        |    | 244198    | yellow      | 4.62355321  |
| ENSMUSG00000062480 | Acat3         |    | 224530    | yellow      | 4.608703924 |
| ENSMUSG00000108713 | NA            | NA |           | turquoise   | 4.574299236 |
| ENSMUSG00000018500 | Adora2b       |    | 11541     | yellow      | 4.574264925 |
| ENSMUSG00000039087 | Rreb1         |    | 68750     | turquoise   | 4.5281956   |
| ENSMUSG00000020486 | 3-Sep         |    | 18952     | turquoise   | 4.511348013 |
| ENSMUSG00000086810 | NA            | NA |           | turquoise   | 4.496143151 |
| ENSMUSG00000092563 | NA            | NA |           | turquoise   | 4.492277055 |
| ENSMUSG00000030088 | Aldh1l1       |    | 107747    | blue        | 4.487021038 |
| ENSMUSG00000047250 | Ptgs1         |    | 19224     | turquoise   | 4.475695407 |
| ENSMUSG00000060477 | Irak2         |    | 108960    | turquoise   | 4.436842524 |
| ENSMUSG00000034714 | Ttyh2         |    | 117160    | purple      | 4.429032126 |
| ENSMUSG00000024421 | Lama3         |    | 16774     | yellow      | 4.426074115 |
| ENSMUSG00000066258 | Trim12a       |    | 76681     | turquoise   | 4.402513879 |
| ENSMUSG00000037742 | Eef1a1        |    | 13627     | black       | 4.303898742 |
| ENSMUSG00000019996 | Map7          |    | 17761     | turquoise   | 4.283319707 |
| ENSMUSG00000045180 | Shroom2       |    | 110380    | blue        | 4.252502031 |
| ENSMUSG00000006728 | NA            | NA |           | black       | 4.247568453 |
| ENSMUSG00000030905 | Crym          |    | 12971     | yellow      | 4.225713565 |
| ENSMUSG00000059796 | Eif4a1        |    | 13681     | black       | 4.196124545 |
| ENSMUSG00000047945 | Marcksl1      |    | 17357     | purple      | 4.193501672 |
| ENSMUSG00000000184 | Ccnd2         |    | 12444     | purple      | 4.18202415  |
| ENSMUSG00000040812 | Agbl2         |    | 271813    | turquoise   | 4.106622619 |
| ENSMUSG00000060036 | Rpl3          |    | 27367     | black       | 4.079804272 |
| ENSMUSG00000048424 | NA            | NA |           | turquoise   | 4.076532456 |
| ENSMUSG00000031563 | NA            | NA |           | turquoise   | 4.037110746 |
| ENSMUSG00000021270 | Hsp90aa1      |    | 15519     | black       | 4.031054392 |
| ENSMUSG00000022312 | Eif3h         |    | 68135     | black       | 4.029658502 |
| ENSMUSG00000087253 | NA            | NA |           | greenyellow | 4.024245712 |
| ENSMUSG00000032399 | Rpl4          |    | 67891     | black       | 3.968980773 |
| ENSMUSG00000037236 | NA            | NA |           | black       | 3.940495943 |
| ENSMUSG00000031167 | Rbm3          |    | 19652     | red         | 3.92446026  |
| ENSMUSG00000028692 | Akr1a1        |    | 58810     | black       | 3.908197973 |
| ENSMUSG00000079260 | Tmppe         |    | 100504715 | turquoise   | 3.905566644 |
| ENSMUSG00000060373 | Hnrnpc        |    | 15381     | black       | 3.895389037 |

|                    |               |    |        |              |             |
|--------------------|---------------|----|--------|--------------|-------------|
| ENSMUSG00000037894 | H2afz         |    | 51788  | red          | 3.857748571 |
| ENSMUSG00000031754 | NA            | NA |        | red          | 3.854944536 |
| ENSMUSG00000063632 | Sox11         |    | 20666  | red          | 3.850280354 |
| ENSMUSG00000027184 | Caprin1       |    | 53872  | black        | 3.850194097 |
| ENSMUSG00000000223 | Drp2          |    | 13497  | turquoise    | 3.847322413 |
| ENSMUSG00000029430 | Ran           |    | 19384  | red          | 3.845251733 |
| ENSMUSG00000036309 | Skp1a         |    | 21402  | midnightblue | 3.825013767 |
| ENSMUSG00000106965 | NA            | NA |        | turquoise    | 3.820146557 |
| ENSMUSG00000028832 | Stmn1         |    | 16765  | red          | 3.811977162 |
| ENSMUSG00000031422 | Morf4l2       |    | 56397  | black        | 3.809390058 |
| ENSMUSG00000066551 | Hmgb1         |    | 15289  | black        | 3.804930868 |
| ENSMUSG00000006498 | Ptbp1         |    | 19205  | black        | 3.792230634 |
| ENSMUSG00000067274 | Rplp0         |    | 11837  | black        | 3.788304821 |
| ENSMUSG00000054766 | Set           |    | 56086  | black        | 3.787947061 |
| ENSMUSG00000001016 | Ilf2          |    | 67781  | red          | 3.767597074 |
| ENSMUSG00000066037 | Hnrnpr        |    | 74326  | black        | 3.749866728 |
| ENSMUSG00000048960 | Prex2         |    | 109294 | purple       | 3.738158335 |
| ENSMUSG00000071172 | Srsf3         |    | 20383  | black        | 3.722119351 |
| ENSMUSG00000022858 | NA            | NA |        | red          | 3.718044153 |
| ENSMUSG00000036915 | Kirrel2       |    | 243911 | turquoise    | 3.711194781 |
| ENSMUSG00000032946 | Rasgrp2       |    | 19395  | turquoise    | 3.692680777 |
| ENSMUSG00000025364 | Pa2g4         |    | 18813  | black        | 3.690768398 |
| ENSMUSG00000015120 | NA            | NA |        | black        | 3.688152588 |
| ENSMUSG00000020265 | Sumo3         |    | 20610  | black        | 3.681406922 |
| ENSMUSG00000024097 | Srsf7         |    | 225027 | black        | 3.673308206 |
| ENSMUSG00000019432 | Ddx39b        |    | 53817  | red          | 3.66629887  |
| ENSMUSG00000083796 | NA            | NA |        | yellow       | 3.634874413 |
| ENSMUSG00000029212 | Gabrb1        |    | 14400  | red          | 3.589414029 |
| ENSMUSG00000076432 | Ywhaq         |    | 22630  | black        | 3.580506189 |
| ENSMUSG00000055612 | Cdca7         |    | 66953  | black        | 3.577346401 |
| ENSMUSG00000078812 | Eif5a         |    | 276770 | black        | 3.574585149 |
| ENSMUSG00000066894 | Vsig10        |    | 231668 | turquoise    | 3.566785866 |
| ENSMUSG00000004530 | Coro1c        |    | 23790  | red          | 3.564209684 |
| ENSMUSG00000041556 | Fbxo2         |    | 230904 | red          | 3.538983795 |
| ENSMUSG00000001525 | Tubb5         |    | 22154  | black        | 3.525647538 |
| ENSMUSG00000026234 | Ncl           |    | 17975  | black        | 3.516945644 |
| ENSMUSG00000015217 | Hmgb3         |    | 15354  | red          | 3.515999713 |
| ENSMUSG00000003038 | Hmgn2         |    | 15331  | red          | 3.513378218 |
| ENSMUSG00000023944 | Hsp90ab1      |    | 15516  | black        | 3.511457366 |
| ENSMUSG00000022285 | Ywhaz         |    | 22631  | midnightblue | 3.493914591 |
| ENSMUSG00000071644 | Eef1g         |    | 67160  | black        | 3.490603998 |
| ENSMUSG00000029614 | Rpl6          |    | 19988  | black        | 3.490571684 |
| ENSMUSG00000026238 | Ptma          |    | 19231  | red          | 3.484707261 |
| ENSMUSG00000058331 | Zfp85         |    | 22746  | turquoise    | 3.48401122  |
| ENSMUSG00000057113 | Npm1          |    | 18148  | black        | 3.478615081 |
| ENSMUSG00000107937 | NA            | NA |        | turquoise    | 3.476958346 |
| ENSMUSG00000107524 | NA            | NA |        | turquoise    | 3.466696142 |
| ENSMUSG00000076437 | 2700094K13Rik |    | 72657  | black        | 3.466550144 |
| ENSMUSG00000027737 | Slc7a11       |    | 26570  | purple       | 3.466463554 |
| ENSMUSG00000095730 | Vmn2r29       |    | 76229  | turquoise    | 3.465745935 |
| ENSMUSG00000049775 | Tmsb4x        |    | 19241  | purple       | 3.464652904 |
| ENSMUSG00000062867 | Impdh2        |    | 23918  | black        | 3.464507382 |
| ENSMUSG00000021546 | Hnrnpk        |    | 15387  | midnightblue | 3.45293836  |
| ENSMUSG00000040759 | Cmtm5         |    | 67272  | purple       | 3.450203267 |



|                    |               |        |              |             |
|--------------------|---------------|--------|--------------|-------------|
| ENSMUSG00000028693 | Nasp          | 50927  | black        | 3.428818499 |
| ENSMUSG00000059049 | Frem1         | 329872 | turquoise    | 3.427961072 |
| ENSMUSG00000046432 | Ngfrap1       | 12070  | black        | 3.421667551 |
| ENSMUSG00000006932 | Ctnnb1        | 12387  | red          | 3.419934219 |
| ENSMUSG00000039105 | Atp6v1g1      | 66290  | midnightblue | 3.417204215 |
| ENSMUSG00000019777 | Hdac2         | 15182  | red          | 3.41584546  |
| ENSMUSG00000033208 | S100b         | 20203  | purple       | 3.415631514 |
| ENSMUSG00000009079 | Ewsr1         | 14030  | red          | 3.413137342 |
| ENSMUSG00000020372 | Gnb2l1        | 14694  | black        | 3.409364228 |
| ENSMUSG00000037736 | Limch1        | 77569  | yellow       | 3.403164517 |
| ENSMUSG00000037242 | Clic4         | 29876  | salmon       | 3.397403872 |
| ENSMUSG00000027404 | Snrpb         | 20638  | black        | 3.397329939 |
| ENSMUSG00000029730 | Mcm7          | 17220  | purple       | 3.395217436 |
| ENSMUSG00000020738 | Sumo2         | 170930 | red          | 3.388721581 |
| ENSMUSG00000008682 | Rpl10         | 110954 | black        | 3.378003784 |
| ENSMUSG00000060126 | NA            | NA     | black        | 3.371844842 |
| ENSMUSG00000028639 | Ybx1          | 22608  | black        | 3.368422248 |
| ENSMUSG00000103957 | NA            | NA     | yellow       | 3.357493525 |
| ENSMUSG00000005566 | Trim28        | 21849  | red          | 3.349107466 |
| ENSMUSG00000019961 | Tmpo          | 21917  | salmon       | 3.342558311 |
| ENSMUSG00000068882 | Ssb           | 20823  | black        | 3.339078457 |
| ENSMUSG00000031311 | Nono          | 53610  | green        | 3.331507175 |
| ENSMUSG00000054717 | Hmgb2         | 97165  | red          | 3.327258135 |
| ENSMUSG00000030224 | Strap         | 20901  | black        | 3.320480498 |
| ENSMUSG00000005732 | NA            | NA     | black        | 3.314292545 |
| ENSMUSG00000098021 | NA            | NA     | brown        | 3.299567395 |
| ENSMUSG00000055676 | NA            | NA     | yellow       | 3.29427071  |
| ENSMUSG00000107336 | NA            | NA     | pink         | 3.293646316 |
| ENSMUSG00000061136 | Prpf40a       | 56194  | red          | 3.293112243 |
| ENSMUSG00000019857 | Asf1a         | 66403  | black        | 3.286200185 |
| ENSMUSG00000030317 | NA            | NA     | purple       | 3.279111324 |
| ENSMUSG00000031320 | Rps4x         | 20102  | black        | 3.270441268 |
| ENSMUSG00000030697 | Ppp4c         | 56420  | red          | 3.268436422 |
| ENSMUSG00000075015 | NA            | NA     | turquoise    | 3.267528315 |
| ENSMUSG00000085928 | 4933427122Rik | 71235  | turquoise    | 3.264316864 |
| ENSMUSG00000042750 | Bex2          | 12069  | black        | 3.25835743  |
| ENSMUSG00000026064 | Ptp4a1        | 19243  | red          | 3.254782012 |
| ENSMUSG00000040681 | NA            | NA     | purple       | 3.254552806 |
| ENSMUSG00000016921 | Srsf6         | 67996  | black        | 3.253799931 |
| ENSMUSG00000054931 | Zkscan4       | 544922 | turquoise    | 3.249375415 |
| ENSMUSG00000029836 | Cbx3          | 12417  | red          | 3.240531589 |
| ENSMUSG00000021131 | NA            | NA     | red          | 3.235823791 |
| ENSMUSG00000005161 | NA            | NA     | black        | 3.235198198 |
| ENSMUSG00000032959 | Pebp1         | 23980  | purple       | 3.233898356 |
| ENSMUSG00000018583 | NA            | NA     | black        | 3.233456625 |
| ENSMUSG00000058799 | Nap1l1        | 53605  | red          | 3.22537662  |
| ENSMUSG00000069662 | Marcks        | 17118  | purple       | 3.221723678 |
| ENSMUSG00000060559 | NA            | NA     | yellow       | 3.220726771 |
| ENSMUSG00000031068 | Glr3          | 30926  | red          | 3.220343687 |
| ENSMUSG00000068823 | Csde1         | 229663 | green        | 3.216566337 |
| ENSMUSG00000039630 | NA            | NA     | red          | 3.215507522 |
| ENSMUSG00000030978 | Rrm1          | 20133  | red          | 3.211854024 |
| ENSMUSG00000020737 | Hn1           | 15374  | red          | 3.210212485 |
| ENSMUSG00000028790 | Khdrbs1       | 20218  | red          | 3.203257813 |

|                    |           |        |              |             |
|--------------------|-----------|--------|--------------|-------------|
| ENSMUSG00000026229 | Psm d1    | 70247  | red          | 3.19049634  |
| ENSMUSG00000091285 | NA        | NA     | greenyellow  | 3.179754313 |
| ENSMUSG00000007850 | Hnrnp h1  | 59013  | green        | 3.178480039 |
| ENSMUSG00000028484 | P sip1    | 101739 | black        | 3.169971569 |
| ENSMUSG00000026281 | D tymk    | 21915  | black        | 3.165790658 |
| ENSMUSG00000090098 | Alms1-ps2 | 623273 | yellow       | 3.161509128 |
| ENSMUSG00000024844 | Banf1     | 23825  | black        | 3.155448705 |
| ENSMUSG00000027566 | P sma7    | 26444  | black        | 3.149817047 |
| ENSMUSG00000061477 | R ps7     | 20115  | black        | 3.14694704  |
| ENSMUSG00000061613 | U2af1     | 108121 | red          | 3.146859123 |
| ENSMUSG00000029447 | NA        | NA     | black        | 3.144623527 |
| ENSMUSG00000034681 | R nps1    | 19826  | black        | 3.138924322 |
| ENSMUSG00000027562 | Car2      | 12349  | purple       | 3.133912616 |
| ENSMUSG00000015749 | Anp32e    | 66471  | red          | 3.131403393 |
| ENSMUSG00000020044 | Timp3     | 21859  | red          | 3.12939519  |
| ENSMUSG00000028759 | Hp1bp3    | 15441  | black        | 3.123248407 |
| ENSMUSG00000032518 | R psa     | 16785  | black        | 3.12270933  |
| ENSMUSG00000031848 | L sm4     | 50783  | red          | 3.122671752 |
| ENSMUSG00000102175 | NA        | NA     | turquoise    | 3.116358382 |
| ENSMUSG00000082570 | NA        | NA     | yellow       | 3.110805234 |
| ENSMUSG00000026174 | R qcd1    | 58184  | black        | 3.109732827 |
| ENSMUSG00000021537 | C etn3    | 12626  | black        | 3.108635636 |
| ENSMUSG00000042079 | H nrnpf   | 98758  | black        | 3.10644082  |
| ENSMUSG00000037601 | NA        | NA     | red          | 3.104142363 |
| ENSMUSG00000028452 | V cp      | 269523 | green        | 3.099102135 |
| ENSMUSG00000097309 | NA        | NA     | yellow       | 3.097952595 |
| ENSMUSG00000043496 | Tril      | 66873  | purple       | 3.095162488 |
| ENSMUSG00000030751 | P sma1    | 26440  | black        | 3.093708967 |
| ENSMUSG00000020018 | S nrpf    | 69878  | red          | 3.091736656 |
| ENSMUSG00000102570 | NA        | NA     | turquoise    | 3.086100475 |
| ENSMUSG00000028156 | NA        | NA     | black        | 3.083500799 |
| ENSMUSG00000092909 | NA        | NA     | yellow       | 3.082731753 |
| ENSMUSG00000103085 | NA        | NA     | turquoise    | 3.082477786 |
| ENSMUSG00000022043 | Trim35    | 66854  | green        | 3.079515443 |
| ENSMUSG00000022841 | Ap2m1     | 11773  | midnightblue | 3.078723666 |
| ENSMUSG00000028455 | Stoml2    | 66592  | black        | 3.072805219 |
| ENSMUSG00000027067 | S srp1    | 20833  | red          | 3.071514334 |
| ENSMUSG00000038374 | R bm8a    | 60365  | black        | 3.061112276 |
| ENSMUSG00000032216 | Nedd4     | 17999  | midnightblue | 3.0594411   |
| ENSMUSG00000098076 | NA        | NA     | turquoise    | 3.056031309 |
| ENSMUSG00000026615 | E prs     | 107508 | red          | 3.05423552  |
| ENSMUSG00000032966 | F kbp1a   | 14225  | black        | 3.053778171 |
| ENSMUSG00000091561 | NA        | NA     | greenyellow  | 3.051050601 |
| ENSMUSG00000028745 | Capzb     | 12345  | midnightblue | 3.048308415 |
| ENSMUSG00000021377 | D ek      | 110052 | black        | 3.045814305 |
| ENSMUSG00000012405 | R pl15    | 66480  | black        | 3.043701558 |
| ENSMUSG00000033732 | S f3b3    | 101943 | red          | 3.038884327 |
| ENSMUSG00000082076 | NA        | NA     | greenyellow  | 3.029713533 |
| ENSMUSG00000031246 | Sh3bgrl   | 56726  | red          | 3.028335051 |
| ENSMUSG00000002102 | P smc3    | 19182  | green        | 3.025870749 |
| ENSMUSG00000051747 | T tn      | 22138  | brown        | 3.018852675 |
| ENSMUSG00000037935 | S marce1  | 57376  | red          | 3.010852773 |
| ENSMUSG00000048022 | T mem229a | 319832 | purple       | 3.003704586 |
| ENSMUSG00000037149 | D dx1     | 104721 | red          | 3.000315394 |

|                    |               |        |              |             |
|--------------------|---------------|--------|--------------|-------------|
| ENSMUSG00000107369 | NA            | NA     | red          | 2.999981886 |
| ENSMUSG00000053453 | Thoc7         | 66231  | red          | 2.99638179  |
| ENSMUSG00000068856 | Sf3b4         | 107701 | black        | 2.984102118 |
| ENSMUSG00000001383 | Zmat2         | 66492  | black        | 2.98316521  |
| ENSMUSG00000028138 | Adh5          | 11532  | green        | 2.982327949 |
| ENSMUSG00000060743 | H3f3a         | 15078  | black        | 2.974348656 |
| ENSMUSG00000081886 | NA            | NA     | greenyellow  | 2.971381124 |
| ENSMUSG00000062647 | Rpl7a         | 27176  | green        | 2.968793589 |
| ENSMUSG00000033767 | D930015E06Rik | 229473 | green        | 2.966550983 |
| ENSMUSG00000004897 | Hdgf          | 15191  | red          | 2.966207997 |
| ENSMUSG00000032178 | Ilf3          | 16201  | green        | 2.95698821  |
| ENSMUSG00000055302 | Mrfap1        | 67568  | green        | 2.94786017  |
| ENSMUSG00000025151 | Maged1        | 94275  | blue         | 2.943309398 |
| ENSMUSG00000041126 | H2afv         | 77605  | black        | 2.937023981 |
| ENSMUSG00000067321 | NA            | NA     | red          | 2.934277423 |
| ENSMUSG00000045799 | NA            | NA     | red          | 2.934106183 |
| ENSMUSG00000070713 | NA            | NA     | red          | 2.929094865 |
| ENSMUSG00000028655 | Mfsd2a        | 76574  | purple       | 2.927111904 |
| ENSMUSG00000024949 | Sf1           | 22668  | red          | 2.924776366 |
| ENSMUSG00000032482 | Cspg5         | 29873  | red          | 2.923735169 |
| ENSMUSG00000022040 | Ephx2         | 13850  | purple       | 2.919113376 |
| ENSMUSG00000020717 | Pecam1        | 18613  | brown        | 2.913342749 |
| ENSMUSG00000078903 | NA            | NA     | turquoise    | 2.912064752 |
| ENSMUSG00000020649 | Rrm2          | 20135  | salmon       | 2.895474484 |
| ENSMUSG00000052040 | Klf13         | 50794  | black        | 2.895018471 |
| ENSMUSG00000043716 | Rpl7          | 19989  | black        | 2.893491751 |
| ENSMUSG00000044080 | S100a1        | 20193  | red          | 2.889980168 |
| ENSMUSG00000105600 | NA            | NA     | cyan         | 2.889677509 |
| ENSMUSG00000082186 | NA            | NA     | turquoise    | 2.882352628 |
| ENSMUSG00000022186 | Oxct1         | 67041  | midnightblue | 2.881289652 |
| ENSMUSG00000106827 | NA            | NA     | greenyellow  | 2.879383999 |
| ENSMUSG00000030663 | 1110004F10Rik | 56372  | green        | 2.867800288 |
| ENSMUSG00000028034 | Fubp1         | 51886  | blue         | 2.867294776 |
| ENSMUSG00000032301 | Psm4          | 26441  | green        | 2.863257738 |
| ENSMUSG00000019179 | Mdh2          | 17448  | green        | 2.85399337  |
| ENSMUSG00000022132 | Cldn10        | 58187  | purple       | 2.84874528  |
| ENSMUSG00000101188 | NA            | NA     | black        | 2.847698636 |
| ENSMUSG00000082536 | NA            | NA     | black        | 2.847446662 |
| ENSMUSG00000079523 | Tmsb10        | 19240  | red          | 2.847310737 |
| ENSMUSG00000084159 | NA            | NA     | black        | 2.845739068 |
| ENSMUSG00000058922 | NA            | NA     | red          | 2.844713606 |
| ENSMUSG00000040204 | 2810417H13Rik | 68026  | magenta      | 2.844153981 |
| ENSMUSG00000020949 | Fkbp3         | 30795  | green        | 2.841937838 |
| ENSMUSG00000059208 | Hnrnpm        | 76936  | green        | 2.841600826 |
| ENSMUSG00000002477 | Snrpd1        | 20641  | black        | 2.839010052 |
| ENSMUSG00000074129 | Rpl13a        | 22121  | black        | 2.832540524 |
| ENSMUSG00000042564 | Fam227a       | 75729  | turquoise    | 2.830979091 |
| ENSMUSG00000055436 | Srsf11        | 69207  | green        | 2.825824033 |
| ENSMUSG00000014402 | Tsg101        | 22088  | green        | 2.819712976 |
| ENSMUSG00000057406 | Whsc1         | 107823 | salmon       | 2.81212534  |
| ENSMUSG00000006301 | Tmbim1        | 69660  | purple       | 2.81085639  |
| ENSMUSG00000049612 | Omg           | 18377  | purple       | 2.810684853 |
| ENSMUSG00000028568 | Btf3l4        | 70533  | black        | 2.810216054 |
| ENSMUSG00000035215 | Lsm7          | 66094  | red          | 2.808501899 |

|                    |               |           |              |             |
|--------------------|---------------|-----------|--------------|-------------|
| ENSMUSG00000015932 | Dstn          | 56431     | green        | 2.804489736 |
| ENSMUSG00000079067 | NA            | NA        | red          | 2.8035594   |
| ENSMUSG00000063902 | NA            | NA        | midnightblue | 2.799134489 |
| ENSMUSG00000028081 | Rps3a1        | 20091     | black        | 2.797882129 |
| ENSMUSG00000042506 | Usp22         | 216825    | green        | 2.797660029 |
| ENSMUSG00000069306 | Hist1h4m      | 100041230 | turquoise    | 2.794386896 |
| ENSMUSG00000028495 | NA            | NA        | black        | 2.782307588 |
| ENSMUSG00000028837 | Psmb2         | 26445     | green        | 2.779892156 |
| ENSMUSG00000024067 | Dpy30         | 66310     | red          | 2.776052456 |
| ENSMUSG00000046341 | NA            | NA        | red          | 2.774808293 |
| ENSMUSG00000003429 | Rps11         | 27207     | black        | 2.772990738 |
| ENSMUSG00000108696 | NA            | NA        | cyan         | 2.770991957 |
| ENSMUSG00000051223 | Bzw1          | 66882     | blue         | 2.769858597 |
| ENSMUSG00000018459 | Slc13a3       | 114644    | purple       | 2.769855759 |
| ENSMUSG00000085572 | NA            | NA        | lightcyan    | 2.767722662 |
| ENSMUSG00000028333 | NA            | NA        | red          | 2.76768048  |
| ENSMUSG00000084349 | NA            | NA        | black        | 2.76109389  |
| ENSMUSG00000036438 | Calm2         | 12314     | black        | 2.75967501  |
| ENSMUSG00000022048 | Dpysl2        | 12934     | midnightblue | 2.7566484   |
| ENSMUSG00000040824 | NA            | NA        | black        | 2.754100276 |
| ENSMUSG00000040785 | Ttc3          | 22129     | blue         | 2.745987152 |
| ENSMUSG00000021115 | Vrk1          | 22367     | red          | 2.745414324 |
| ENSMUSG00000049892 | Rasd1         | 19416     | yellow       | 2.737221422 |
| ENSMUSG00000005610 | NA            | NA        | blue         | 2.729343661 |
| ENSMUSG00000032199 | Polr2m        | 28015     | green        | 2.723815535 |
| ENSMUSG00000020167 | Tcf3          | 21423     | red          | 2.721078773 |
| ENSMUSG00000024217 | Snrpc         | 20630     | black        | 2.715631621 |
| ENSMUSG00000089695 | NA            | NA        | greenyellow  | 2.715282502 |
| ENSMUSG00000057236 | Rbbp4         | 19646     | red          | 2.71398077  |
| ENSMUSG00000005779 | Psmb4         | 19172     | midnightblue | 2.71127671  |
| ENSMUSG00000095677 | Dynlt1f       | 100040531 | red          | 2.704906227 |
| ENSMUSG00000063480 | Nhp2l1        | 20826     | black        | 2.702790507 |
| ENSMUSG00000047215 | Rpl9          | 20005     | black        | 2.70145543  |
| ENSMUSG00000037058 | Paip2         | 67869     | midnightblue | 2.698257254 |
| ENSMUSG00000021660 | Btf3          | 218490    | blue         | 2.693796176 |
| ENSMUSG00000006333 | Rps9          | 76846     | green        | 2.690208113 |
| ENSMUSG00000030603 | Psmc4         | 23996     | blue         | 2.684052643 |
| ENSMUSG00000001911 | Nfix          | 18032     | red          | 2.682557057 |
| ENSMUSG00000063511 | Snrnp70       | 20637     | green        | 2.680219015 |
| ENSMUSG00000012848 | Rps5          | 20103     | black        | 2.674813348 |
| ENSMUSG00000042312 | S100a13       | 20196     | red          | 2.674556015 |
| ENSMUSG00000021097 | Clmn          | 94040     | purple       | 2.674412181 |
| ENSMUSG00000054509 | Parp4         | 328417    | turquoise    | 2.674036067 |
| ENSMUSG00000029413 | Naaa          | 67111     | purple       | 2.667598322 |
| ENSMUSG00000024576 | Csnk1a1       | 93687     | blue         | 2.664226766 |
| ENSMUSG00000024593 | Megf10        | 70417     | purple       | 2.663172169 |
| ENSMUSG00000008393 | Carhsp1       | 52502     | purple       | 2.662178676 |
| ENSMUSG00000037805 | Rpl10a        | 19896     | black        | 2.661883501 |
| ENSMUSG00000020089 | Ppa1          | 67895     | black        | 2.657232706 |
| ENSMUSG00000003526 | Prodh         | 19125     | red          | 2.650928826 |
| ENSMUSG00000000740 | Rpl13         | 270106    | black        | 2.644511943 |
| ENSMUSG00000029472 | Anapc5        | 59008     | green        | 2.643976632 |
| ENSMUSG00000043833 | 2900005J15Rik | 67261     | turquoise    | 2.642715802 |
| ENSMUSG00000023004 | Tuba1b        | 22143     | red          | 2.642112204 |

|                    |         |    |           |              |             |
|--------------------|---------|----|-----------|--------------|-------------|
| ENSMUSG00000060703 | Cd302   |    | 66205     | purple       | 2.641264266 |
| ENSMUSG00000028367 | Txn1    |    | 22166     | black        | 2.641212836 |
| ENSMUSG00000033306 | Lpp     |    | 210126    | purple       | 2.639580025 |
| ENSMUSG00000090862 | Rps13   |    | 68052     | black        | 2.637964805 |
| ENSMUSG00000084033 | NA      | NA |           | yellow       | 2.634368448 |
| ENSMUSG00000039542 | Ncam1   |    | 17967     | purple       | 2.631610558 |
| ENSMUSG00000022201 | Zfr     |    | 22763     | midnightblue | 2.629766848 |
| ENSMUSG00000058558 | Rpl5    |    | 100503670 | black        | 2.628652808 |
| ENSMUSG00000093589 | NA      | NA |           | yellow       | 2.627650456 |
| ENSMUSG00000020086 | H2afy2  |    | 404634    | red          | 2.625597594 |
| ENSMUSG00000020358 | Hnrnpab |    | 15384     | black        | 2.625421763 |
| ENSMUSG00000030744 | Rps3    |    | 27050     | black        | 2.624376132 |
| ENSMUSG00000068749 | Psm5    |    | 26442     | blue         | 2.621888704 |
| ENSMUSG00000026750 | Psm7    |    | 19177     | green        | 2.616578983 |
| ENSMUSG00000066705 | Fxyd6   |    | 59095     | green        | 2.614309211 |
| ENSMUSG00000003970 | Rpl8    |    | 26961     | black        | 2.612351602 |
| ENSMUSG00000032014 | Oaf     |    | 102644    | black        | 2.611400809 |
| ENSMUSG00000081999 | NA      | NA |           | red          | 2.608593056 |
| ENSMUSG00000030307 | Slc6a11 |    | 243616    | purple       | 2.604797396 |
| ENSMUSG00000025362 | Rps26   |    | 27370     | black        | 2.602963275 |
| ENSMUSG00000034120 | Srsf2   |    | 20382     | green        | 2.600209642 |
| ENSMUSG00000047675 | Rps8    |    | 20116     | black        | 2.59655114  |
| ENSMUSG00000039128 | Cdc123  |    | 98828     | blue         | 2.595357088 |
| ENSMUSG00000006057 | NA      | NA |           | green        | 2.594919969 |
| ENSMUSG00000022283 | Pabpc1  |    | 18458     | black        | 2.587494893 |
| ENSMUSG00000033350 | NA      | NA |           | purple       | 2.587119819 |
| ENSMUSG00000028986 | Kihl7   |    | 52323     | black        | 2.586681801 |
| ENSMUSG00000017404 | Rpl19   |    | 19921     | black        | 2.584000262 |
| ENSMUSG00000008683 | Rps15a  |    | 267019    | black        | 2.582958666 |
| ENSMUSG00000024853 | Sf3b2   |    | 319322    | black        | 2.581947992 |
| ENSMUSG00000083899 | NA      | NA |           | black        | 2.576614114 |
| ENSMUSG00000022338 | Eny2    |    | 223527    | red          | 2.573751889 |
| ENSMUSG00000042520 | Ubp2l   |    | 74383     | black        | 2.573348761 |
| ENSMUSG00000026049 | Tex30   |    | 75623     | magenta      | 2.566419982 |
| ENSMUSG00000061787 | Rps17   |    | 20068     | black        | 2.558657796 |
| ENSMUSG00000025290 | Rps24   |    | 20088     | black        | 2.558174874 |
| ENSMUSG00000024330 | Col11a2 |    | 12815     | black        | 2.557690591 |
| ENSMUSG00000008090 | Fgfr1   |    | 116701    | purple       | 2.553001986 |
| ENSMUSG00000015804 | Med28   |    | 66999     | green        | 2.550821059 |
| ENSMUSG00000074781 | Ube2n   |    | 93765     | midnightblue | 2.550766687 |
| ENSMUSG00000049517 | NA      | NA |           | black        | 2.547898151 |
| ENSMUSG00000044533 | Rps2    |    | 16898     | blue         | 2.546648571 |
| ENSMUSG00000032187 | Smarca4 |    | 20586     | black        | 2.543878656 |
| ENSMUSG00000040274 | Cdk6    |    | 12571     | red          | 2.542420848 |
| ENSMUSG00000040385 | Ppp1ca  |    | 19045     | midnightblue | 2.542105878 |

**Table S3 DVC genes (Astrocytes vs NSCs)**

| EnsembleID         | Symbol        | GeneID | Module  | STS         |
|--------------------|---------------|--------|---------|-------------|
| ENSMUSG00000031262 | Cenpi         | 102920 | magenta | 7.045076796 |
| ENSMUSG00000038379 | Ttk           | 22137  | magenta | 7.040353913 |
| ENSMUSG00000037544 | Dlgap5        | 218977 | magenta | 6.969934611 |
| ENSMUSG00000039396 | Neil3         | 234258 | magenta | 6.939251008 |
| ENSMUSG00000051378 | Kif18b        | 70218  | magenta | 6.926592333 |
| ENSMUSG00000042029 | Ncapg2        | 76044  | magenta | 6.900255264 |
| ENSMUSG00000046295 | Ankle1        | 234396 | magenta | 6.842552806 |
| ENSMUSG00000032400 | Zwilch        | 68014  | magenta | 6.760088804 |
| ENSMUSG00000036223 | Ska1          | 66468  | magenta | 6.714810057 |
| ENSMUSG00000023940 | Sgol1         | 72415  | magenta | 6.708710629 |
| ENSMUSG00000025140 | Pycr1         | 209027 | magenta | 6.697664261 |
| ENSMUSG00000037169 | Mycn          | 18109  | red     | 6.695038453 |
| ENSMUSG00000029591 | Ung           | 22256  | salmon  | 6.67454864  |
| ENSMUSG00000024660 | Incenp        | 16319  | magenta | 6.641144283 |
| ENSMUSG00000030867 | Plk1          | 18817  | magenta | 6.602847209 |
| ENSMUSG00000036777 | Anln          | 68743  | magenta | 6.582890323 |
| ENSMUSG00000053560 | Ier2          | 15936  | red     | 6.54778864  |
| ENSMUSG00000021714 | Cenpk         | 60411  | magenta | 6.545029016 |
| ENSMUSG00000050410 | Tcf19         | 106795 | magenta | 6.53762498  |
| ENSMUSG00000029910 | Mad2l1        | 56150  | magenta | 6.528579723 |
| ENSMUSG00000098090 | 2700099C18Rik | 77022  | magenta | 6.523100854 |
| ENSMUSG00000027115 | Kif18a        | 228421 | magenta | 6.513054925 |
| ENSMUSG00000035455 | Figl1         | 60530  | salmon  | 6.504220591 |
| ENSMUSG00000031756 | Cenpn         | 72155  | magenta | 6.502304875 |
| ENSMUSG00000020897 | Aurkb         | 20877  | magenta | 6.479706174 |
| ENSMUSG00000024795 | Kif20b        | 240641 | magenta | 6.4683761   |
| ENSMUSG00000026039 | Sgol2a        | 68549  | magenta | 6.466257913 |
| ENSMUSG00000024056 | Ndc80         | 67052  | magenta | 6.444245289 |
| ENSMUSG00000032113 | Chek1         | 12649  | salmon  | 6.438847106 |
| ENSMUSG00000003436 | Dil3          | 13389  | red     | 6.428387534 |
| ENSMUSG00000018169 | Mfng          | 17305  | red     | 6.424938201 |
| ENSMUSG00000031403 | Dkc1          | 245474 | black   | 6.395817098 |
| ENSMUSG00000026622 | Nek2          | 18005  | magenta | 6.376128636 |
| ENSMUSG00000034329 | Brip1         | 237911 | magenta | 6.367710219 |
| ENSMUSG00000020212 | Mdm1          | 17245  | magenta | 6.349591708 |
| ENSMUSG00000027361 | Gabpb1        | 14391  | magenta | 6.321542748 |
| ENSMUSG00000025764 | Jade1         | 269424 | magenta | 6.32057661  |
| ENSMUSG00000024261 | Syt4          | 20983  | magenta | 6.295537083 |
| ENSMUSG00000032254 | Kif23         | 71819  | magenta | 6.285205414 |
| ENSMUSG00000068101 | Cenpm         | 66570  | magenta | 6.267349059 |
| ENSMUSG00000022034 | Esco2         | 71988  | magenta | 6.255208649 |
| ENSMUSG00000033952 | Aspm          | 12316  | magenta | 6.245181294 |
| ENSMUSG00000026605 | Cenpf         | 108000 | magenta | 6.211044513 |
| ENSMUSG00000041498 | Kif14         | 381293 | magenta | 6.20483541  |
| ENSMUSG00000037466 | NA            | NA     | magenta | 6.198080842 |
| ENSMUSG00000098318 | 1190002F15Rik | 381822 | magenta | 6.166134896 |
| ENSMUSG00000021697 | Depdc1b       | 218581 | magenta | 6.164886449 |
| ENSMUSG00000023505 | Cdca3         | 14793  | magenta | 6.159025097 |
| ENSMUSG00000025507 | Pidd1         | 57913  | salmon  | 6.102157539 |
| ENSMUSG00000028068 | Iqgap3        | 404710 | magenta | 6.077248618 |
| ENSMUSG00000034023 | Fancd2        | 211651 | magenta | 6.072105693 |

|                    |              |    |        |           |             |
|--------------------|--------------|----|--------|-----------|-------------|
| ENSMUSG00000051517 | Arhgef39     |    | 230098 | magenta   | 6.068053878 |
| ENSMUSG00000031527 | Eri1         |    | 67276  | red       | 6.059298076 |
| ENSMUSG00000024534 | Sncap        |    | 67847  | purple    | 6.045457804 |
| ENSMUSG00000020808 | Fam64a       |    | 109212 | magenta   | 6.041768996 |
| ENSMUSG00000022978 | Mis18a       |    | 66578  | magenta   | 6.034567642 |
| ENSMUSG00000059791 | Nrm          |    | 106582 | salmon    | 6.032823826 |
| ENSMUSG00000039748 | NA           | NA |        | red       | 6.001605426 |
| ENSMUSG00000020974 | Pole2        |    | 18974  | salmon    | 5.994366209 |
| ENSMUSG00000046179 | E2f8         |    | 108961 | magenta   | 5.986023837 |
| ENSMUSG00000017716 | Birc5        |    | 11799  | magenta   | 5.981662298 |
| ENSMUSG00000020973 | NA           | NA |        | magenta   | 5.979856275 |
| ENSMUSG00000037846 | Rtkn2        |    | 170799 | magenta   | 5.968152778 |
| ENSMUSG00000022360 | Atad2        |    | 70472  | magenta   | 5.943896701 |
| ENSMUSG00000040084 | Bub1b        |    | 12236  | magenta   | 5.941837579 |
| ENSMUSG00000050107 | Gsg2         |    | 14841  | magenta   | 5.927413699 |
| ENSMUSG00000033031 | C330027C09Ri |    | 224171 | magenta   | 5.923893222 |
| ENSMUSG00000092074 | NA           | NA |        | red       | 5.913237495 |
| ENSMUSG00000073705 | Apitd1       |    | 69928  | salmon    | 5.906722934 |
| ENSMUSG00000022945 | Chaf1b       |    | 110749 | salmon    | 5.893285432 |
| ENSMUSG00000034906 | Ncaph        |    | 215387 | magenta   | 5.864369809 |
| ENSMUSG00000066232 | Ipo7         |    | 233726 | red       | 5.859666437 |
| ENSMUSG00000042489 | Clspn        |    | 269582 | magenta   | 5.857422081 |
| ENSMUSG00000042606 | Hirip3       |    | 233876 | salmon    | 5.839202767 |
| ENSMUSG00000068744 | Psrc1        |    | 56742  | magenta   | 5.831867692 |
| ENSMUSG00000022422 | Dscc1        |    | 72107  | magenta   | 5.825100763 |
| ENSMUSG00000030268 | Bcat1        |    | 12035  | red       | 5.814666012 |
| ENSMUSG00000022339 | Ebag9        |    | 55960  | red       | 5.808685887 |
| ENSMUSG00000030091 | Nup210       |    | 54563  | black     | 5.806623923 |
| ENSMUSG00000027379 | NA           | NA |        | magenta   | 5.797122322 |
| ENSMUSG00000017499 | Cdc6         |    | 23834  | salmon    | 5.794476641 |
| ENSMUSG00000020330 | Hmmr         |    | 15366  | magenta   | 5.793439317 |
| ENSMUSG00000026669 | Mcm10        |    | 70024  | salmon    | 5.790359623 |
| ENSMUSG00000006398 | Cdc20        |    | 107995 | magenta   | 5.788017572 |
| ENSMUSG00000007080 | Pole         |    | 18973  | salmon    | 5.786819845 |
| ENSMUSG00000024177 | Nme4         |    | 56520  | black     | 5.776286783 |
| ENSMUSG00000041431 | Ccnb1        |    | 268697 | magenta   | 5.764072575 |
| ENSMUSG00000017146 | Brca1        |    | 12189  | salmon    | 5.738693014 |
| ENSMUSG00000030346 | Rad51ap1     |    | 19362  | magenta   | 5.714800006 |
| ENSMUSG00000062248 | Cks2         |    | 66197  | magenta   | 5.695732479 |
| ENSMUSG00000027699 | Ect2         |    | 13605  | magenta   | 5.693015048 |
| ENSMUSG00000027078 | Ube2l6       |    | 56791  | cyan      | 5.68959141  |
| ENSMUSG00000074476 | Spc24        |    | 67629  | magenta   | 5.68423657  |
| ENSMUSG00000002870 | Mcm2         |    | 17216  | salmon    | 5.67930642  |
| ENSMUSG00000035824 | Tk2          |    | 57813  | turquoise | 5.667164115 |
| ENSMUSG00000037474 | Dtl          |    | 76843  | salmon    | 5.656292036 |
| ENSMUSG00000020185 | E2f7         |    | 52679  | magenta   | 5.652310308 |
| ENSMUSG00000028044 | Cks1b        |    | 54124  | magenta   | 5.645947372 |
| ENSMUSG00000014773 | Dll1         |    | 13388  | red       | 5.636068078 |
| ENSMUSG00000012443 | Kif11        |    | 16551  | magenta   | 5.635705263 |
| ENSMUSG00000022686 | B3gnt5       |    | 108105 | salmon    | 5.635441119 |
| ENSMUSG00000056708 | Ier5         |    | 15939  | green     | 5.629422869 |
| ENSMUSG00000015880 | Ncapg        |    | 54392  | magenta   | 5.609745236 |
| ENSMUSG00000094248 | NA           | NA |        | magenta   | 5.599713846 |
| ENSMUSG00000034317 | Trim59       |    | 66949  | magenta   | 5.599617755 |

|                    |               |           |           |             |
|--------------------|---------------|-----------|-----------|-------------|
| ENSMUSG00000031284 | Pak3          | 18481     | red       | 5.597015828 |
| ENSMUSG00000021175 | Cdca7l        | 217946    | red       | 5.584894844 |
| ENSMUSG00000047534 | Mis18bp1      | 217653    | magenta   | 5.581982564 |
| ENSMUSG00000023963 | Cyp39a1       | 56050     | magenta   | 5.574200111 |
| ENSMUSG00000031004 | Mki67         | 17345     | magenta   | 5.57008795  |
| ENSMUSG00000006715 | Gmnn          | 57441     | magenta   | 5.524538933 |
| ENSMUSG00000037725 | Ckap2         | 80986     | magenta   | 5.518012177 |
| ENSMUSG00000021087 | Rtn1          | 104001    | purple    | 5.509183219 |
| ENSMUSG00000048922 | Cdca2         | 108912    | magenta   | 5.49943823  |
| ENSMUSG00000024791 | Cdca5         | 67849     | magenta   | 5.494616315 |
| ENSMUSG00000001228 | Uhrf1         | 18140     | salmon    | 5.493426425 |
| ENSMUSG00000048327 | Ckap2l        | 70466     | magenta   | 5.453123867 |
| ENSMUSG00000022454 | Nell2         | 54003     | red       | 5.446614055 |
| ENSMUSG00000035946 | Gsx2          | 14843     | blue      | 5.444106727 |
| ENSMUSG00000025574 | Tk1           | 21877     | magenta   | 5.431806722 |
| ENSMUSG00000039985 | Fam60a        | 56306     | red       | 5.431687411 |
| ENSMUSG00000026134 | Prim2         | 19076     | magenta   | 5.426232746 |
| ENSMUSG00000028560 | Usp1          | 230484    | magenta   | 5.425530601 |
| ENSMUSG00000001403 | Ube2c         | 68612     | magenta   | 5.425394048 |
| ENSMUSG00000006585 | Cdt1          | 67177     | salmon    | 5.4201187   |
| ENSMUSG00000057706 | Mex3b         | 108797    | salmon    | 5.414704878 |
| ENSMUSG00000020029 | Nudt4         | 71207     | magenta   | 5.405435378 |
| ENSMUSG00000020649 | Rrm2          | 20135     | salmon    | 5.393510472 |
| ENSMUSG00000074802 | Gas2l3        | 237436    | magenta   | 5.376010671 |
| ENSMUSG00000028873 | Cdca8         | 52276     | magenta   | 5.364641871 |
| ENSMUSG00000027326 | Casc5         | 76464     | magenta   | 5.362164902 |
| ENSMUSG00000026779 | Mastl         | 67121     | salmon    | 5.348816652 |
| ENSMUSG00000053137 | Mapk11        | 19094     | green     | 5.342162761 |
| ENSMUSG00000042388 | Dlgap3        | 242667    | salmon    | 5.341096717 |
| ENSMUSG00000022322 | Shcbp1        | 20419     | magenta   | 5.335466894 |
| ENSMUSG00000038644 | Pold1         | 18971     | black     | 5.332841615 |
| ENSMUSG00000024691 | Fam111a       | 107373    | magenta   | 5.315988936 |
| ENSMUSG00000040274 | Cdk6          | 12571     | red       | 5.312524944 |
| ENSMUSG00000038605 | Samd10        | 229011    | grey60    | 5.311494163 |
| ENSMUSG00000019942 | Cdk1          | 12534     | magenta   | 5.288156964 |
| ENSMUSG00000028540 | Dph2          | 67728     | blue      | 5.287899775 |
| ENSMUSG00000024590 | Lmnb1         | 16906     | red       | 5.232205258 |
| ENSMUSG00000078773 | Rad54b        | 623474    | magenta   | 5.226379225 |
| ENSMUSG00000035683 | Melk          | 17279     | magenta   | 5.178583702 |
| ENSMUSG00000022033 | Pbk           | 52033     | magenta   | 5.172277871 |
| ENSMUSG00000063445 | Nmral1        | 67824     | salmon    | 5.171012125 |
| ENSMUSG00000105987 | AI506816      | 433855    | red       | 5.169073156 |
| ENSMUSG00000024165 | Hn1l          | 52009     | purple    | 5.150830606 |
| ENSMUSG00000031365 | Zfp275        | 27081     | blue      | 5.141857167 |
| ENSMUSG00000010505 | Myt1          | 17932     | cyan      | 5.134766341 |
| ENSMUSG00000066705 | Fxyd6         | 59095     | green     | 5.130529444 |
| ENSMUSG00000046591 | Ticrr         | 77011     | magenta   | 5.129641327 |
| ENSMUSG00000005233 | Spc25         | 66442     | magenta   | 5.124602153 |
| ENSMUSG00000029223 | Uchl1         | 22223     | blue      | 5.119238396 |
| ENSMUSG00000005410 | Mcm5          | 17218     | salmon    | 5.094629614 |
| ENSMUSG00000019966 | Kitl          | 17311     | lightcyan | 5.079927698 |
| ENSMUSG00000040204 | 2810417H13Rik | 68026     | magenta   | 5.067395086 |
| ENSMUSG00000000861 | Bcl11a        | 14025     | red       | 5.066696518 |
| ENSMUSG00000095677 | Dynlt1f       | 100040531 | red       | 5.059710286 |



|                    |               |    |           |             |             |
|--------------------|---------------|----|-----------|-------------|-------------|
| ENSMUSG00000030096 | Slc6a6        |    | 21366     | turquoise   | 5.03661169  |
| ENSMUSG00000020914 | Top2a         |    | 21973     | magenta     | 5.033510458 |
| ENSMUSG00000002997 | Prkar2b       |    | 19088     | blue        | 5.008061029 |
| ENSMUSG00000036913 | Trim67        |    | 330863    | green       | 4.992522609 |
| ENSMUSG00000036061 | NA            | NA |           | brown       | 4.983697443 |
| ENSMUSG00000085007 | Gm11549       |    | 100503068 | grey60      | 4.982185082 |
| ENSMUSG00000056749 | Nfil3         |    | 18030     | cyan        | 4.980627055 |
| ENSMUSG00000028438 | Kif24         |    | 109242    | magenta     | 4.973917441 |
| ENSMUSG00000055745 | Ldoc1l        |    | 223732    | brown       | 4.969446861 |
| ENSMUSG00000029554 | Mad1l1        |    | 17120     | blue        | 4.929931352 |
| ENSMUSG00000027968 | Larp7         |    | 28036     | green       | 4.917212052 |
| ENSMUSG00000100832 | Gm29260       |    | 102639765 | blue        | 4.906275772 |
| ENSMUSG00000101236 | NA            | NA |           | red         | 4.880635839 |
| ENSMUSG00000043004 | Gng2          |    | 14702     | red         | 4.856023285 |
| ENSMUSG00000035561 | Aldh1b1       |    | 72535     | cyan        | 4.849981832 |
| ENSMUSG00000010048 | Ifrd2         |    | 15983     | blue        | 4.849556005 |
| ENSMUSG00000023232 | Serinc2       |    | 230779    | blue        | 4.825565028 |
| ENSMUSG00000048895 | Cdk5r1        |    | 12569     | green       | 4.81918109  |
| ENSMUSG00000029168 | Dpysl5        |    | 65254     | green       | 4.802716835 |
| ENSMUSG00000079553 | Kifc1         |    | 100502766 | magenta     | 4.784723667 |
| ENSMUSG00000026819 | Slc25a25      |    | 227731    | lightcyan   | 4.737066409 |
| ENSMUSG00000040428 | Plekha4       |    | 69217     | cyan        | 4.641527304 |
| ENSMUSG00000068735 | Trp53i11      |    | 277414    | cyan        | 4.639514067 |
| ENSMUSG00000038418 | NA            | NA |           | red         | 4.593870527 |
| ENSMUSG00000016757 | Tll12         |    | 223723    | blue        | 4.582487799 |
| ENSMUSG00000038119 | Cdon          |    | 57810     | brown       | 4.57986921  |
| ENSMUSG00000037572 | Wdhd1         |    | 218973    | salmon      | 4.566585712 |
| ENSMUSG00000052727 | Map1b         |    | 17755     | green       | 4.563831863 |
| ENSMUSG00000094627 | NA            | NA |           | red         | 4.555651935 |
| ENSMUSG00000021700 | Rab3c         |    | 67295     | cyan        | 4.545422321 |
| ENSMUSG00000018417 | Myo1b         |    | 17912     | blue        | 4.524579175 |
| ENSMUSG00000003500 | Impdh1        |    | 23917     | cyan        | 4.52347513  |
| ENSMUSG00000051855 | Mest          |    | 17294     | blue        | 4.489539833 |
| ENSMUSG00000005447 | Pafah1b3      |    | 18476     | greenyellow | 4.426146848 |
| ENSMUSG00000021215 | Net1          |    | 56349     | cyan        | 4.403972724 |
| ENSMUSG00000069793 | Slfn9         |    | 237886    | blue        | 4.397125732 |
| ENSMUSG00000090523 | Gypc          |    | 71683     | cyan        | 4.392778088 |
| ENSMUSG00000031934 | NA            | NA |           | blue        | 4.389588905 |
| ENSMUSG00000052504 | NA            | NA |           | blue        | 4.386937309 |
| ENSMUSG00000029687 | Ezh2          |    | 14056     | magenta     | 4.378939262 |
| ENSMUSG00000057093 | C030039L03Rik |    | 112415    | turquoise   | 4.371971741 |
| ENSMUSG00000019773 | Fbxo5         |    | 67141     | magenta     | 4.365519602 |
| ENSMUSG00000030641 | Ddias         |    | 74041     | cyan        | 4.360107215 |
| ENSMUSG00000023008 | Fmnl3         |    | 22379     | turquoise   | 4.358886394 |
| ENSMUSG00000029790 | Cep41         |    | 83922     | lightcyan   | 4.338719445 |
| ENSMUSG00000006205 | Htra1         |    | 56213     | red         | 4.317847828 |
| ENSMUSG00000042763 | Maneal        |    | 215090    | blue        | 4.305333658 |
| ENSMUSG00000021285 | Ppp1r13b      |    | 21981     | yellow      | 4.30138439  |
| ENSMUSG00000022519 | Srl           |    | 106393    | brown       | 4.299680331 |
| ENSMUSG00000020186 | Csrp2         |    | 13008     | lightcyan   | 4.256338304 |
| ENSMUSG00000037902 | Sirpa         |    | 19261     | red         | 4.251411607 |
| ENSMUSG00000092035 | Peg10         |    | 170676    | turquoise   | 4.21239152  |
| ENSMUSG00000004031 | Brinp2        |    | 240843    | turquoise   | 4.205172469 |
| ENSMUSG00000106386 | NA            | NA |           | turquoise   | 4.20331641  |

|                    |               |    |        |             |             |
|--------------------|---------------|----|--------|-------------|-------------|
| ENSMUSG00000050953 | Gja1          |    | 14609  | red         | 4.198083798 |
| ENSMUSG00000039542 | Ncam1         |    | 17967  | purple      | 4.195141986 |
| ENSMUSG00000064125 | Prr36         |    | 73072  | blue        | 4.183865625 |
| ENSMUSG00000029594 | Rbm19         |    | 74111  | brown       | 4.183505379 |
| ENSMUSG00000028137 | Celf3         |    | 78784  | green       | 4.172514804 |
| ENSMUSG00000063972 | Nr6a1         |    | 14536  | greenyellow | 4.158430009 |
| ENSMUSG00000046034 | Otulin        |    | 432940 | brown       | 4.15640043  |
| ENSMUSG00000084221 | NA            | NA |        | red         | 4.155213639 |
| ENSMUSG00000091285 | NA            | NA |        | greenyellow | 4.106929003 |
| ENSMUSG00000026974 | NA            | NA |        | blue        | 4.104076324 |
| ENSMUSG00000039187 | Fanci         |    | 208836 | salmon      | 4.097587549 |
| ENSMUSG00000020591 | Ntsr2         |    | 18217  | purple      | 4.069686476 |
| ENSMUSG00000036377 | C530008M17Ri  |    | 320827 | turquoise   | 4.049625967 |
| ENSMUSG00000026623 | Lpgat1        |    | 226856 | turquoise   | 4.029375464 |
| ENSMUSG00000028901 | Gmeb1         |    | 56809  | blue        | 4.028675033 |
| ENSMUSG00000022037 | Clu           |    | 12759  | red         | 4.020287869 |
| ENSMUSG00000058385 | Hist1h2bg     |    | 319181 | cyan        | 4.019083415 |
| ENSMUSG00000104784 | NA            | NA |        | turquoise   | 4.01699375  |
| ENSMUSG00000090946 | Ccdc71l       |    | 72123  | turquoise   | 3.984516612 |
| ENSMUSG00000033762 | Recql4        |    | 79456  | brown       | 3.98265207  |
| ENSMUSG00000038822 | Hace1         |    | 209462 | turquoise   | 3.973461934 |
| ENSMUSG00000010175 | Prox1         |    | 19130  | cyan        | 3.965840415 |
| ENSMUSG00000093661 | Eif4e3        |    | 66892  | turquoise   | 3.958662012 |
| ENSMUSG00000080779 | NA            | NA |        | tan         | 3.950978662 |
| ENSMUSG00000062380 | Tubb3         |    | 22152  | cyan        | 3.948838766 |
| ENSMUSG00000030428 | Ttyh1         |    | 57776  | red         | 3.947290508 |
| ENSMUSG00000017390 | Aldoc         |    | 11676  | red         | 3.944650356 |
| ENSMUSG00000043091 | Tuba1c        |    | 22146  | magenta     | 3.923269059 |
| ENSMUSG00000030235 | Slco1c1       |    | 58807  | purple      | 3.914322516 |
| ENSMUSG00000040195 | 1700012D01Rik |    | 72243  | magenta     | 3.912679281 |
| ENSMUSG00000030677 | Kif22         |    | 110033 | magenta     | 3.909225295 |
| ENSMUSG00000004892 | Bcan          |    | 12032  | red         | 3.900253955 |
| ENSMUSG00000004347 | Pde1c         |    | 18575  | greenyellow | 3.894320789 |
| ENSMUSG00000031760 | Mt3           |    | 17751  | red         | 3.87535594  |
| ENSMUSG00000022564 | Grina         |    | 66168  | red         | 3.873320787 |
| ENSMUSG00000045092 | S1pr1         |    | 13609  | purple      | 3.870278825 |
| ENSMUSG00000037788 | Vopp1         |    | 232023 | turquoise   | 3.870266136 |
| ENSMUSG00000106682 | NA            | NA |        | brown       | 3.856362614 |
| ENSMUSG00000038208 | Pgap3         |    | 320655 | turquoise   | 3.853570772 |
| ENSMUSG00000086515 | NA            | NA |        | turquoise   | 3.823281877 |
| ENSMUSG00000031604 | Msmo1         |    | 66234  | purple      | 3.815915141 |
| ENSMUSG00000026683 | Nuf2          |    | 66977  | magenta     | 3.812580682 |
| ENSMUSG00000020846 | Fam101b       |    | 76566  | brown       | 3.808879118 |
| ENSMUSG00000032783 | Troap         |    | 78733  | magenta     | 3.801205655 |
| ENSMUSG00000041911 | Dlx1          |    | 13390  | cyan        | 3.790950062 |
| ENSMUSG00000021508 | Cxcl14        |    | 57266  | purple      | 3.788674177 |
| ENSMUSG00000043415 | Otud1         |    | 71198  | turquoise   | 3.782018017 |
| ENSMUSG00000058567 | NA            | NA |        | yellow      | 3.774291166 |
| ENSMUSG00000026049 | Tex30         |    | 75623  | magenta     | 3.767338424 |
| ENSMUSG00000068466 | NA            | NA |        | red         | 3.763067318 |
| ENSMUSG00000033676 | Gabbr3        |    | 14402  | turquoise   | 3.758978593 |
| ENSMUSG00000047139 | Cd24a         |    | 12484  | cyan        | 3.743780523 |
| ENSMUSG00000027496 | Aurka         |    | 20878  | magenta     | 3.730085099 |
| ENSMUSG00000046204 | Pnma2         |    | 239157 | yellow      | 3.713902471 |

|                    |               |    |           |             |             |
|--------------------|---------------|----|-----------|-------------|-------------|
| ENSMUSG00000031285 | Dcx           |    | 13193     | cyan        | 3.690943711 |
| ENSMUSG00000003779 | Kif20a        |    | 19348     | magenta     | 3.674240884 |
| ENSMUSG00000026424 | Gpr3711       |    | 171469    | purple      | 3.664948816 |
| ENSMUSG00000089695 | NA            | NA |           | greenyellow | 3.659975891 |
| ENSMUSG00000063757 | NA            | NA |           | turquoise   | 3.647374246 |
| ENSMUSG00000063172 | Hspb11        |    | 72938     | brown       | 3.646124087 |
| ENSMUSG00000041329 | Atp1b2        |    | 11932     | purple      | 3.622947649 |
| ENSMUSG00000026873 | Phf19         |    | 74016     | magenta     | 3.617590557 |
| ENSMUSG00000082711 | NA            | NA |           | yellow      | 3.601519162 |
| ENSMUSG00000083033 | NA            | NA |           | tan         | 3.584612627 |
| ENSMUSG00000027959 | Sass6         |    | 72776     | turquoise   | 3.577571542 |
| ENSMUSG00000030796 | Tead2         |    | 21677     | salmon      | 3.566762165 |
| ENSMUSG00000052698 | Tln2          |    | 70549     | blue        | 3.563794208 |
| ENSMUSG00000066878 | NA            | NA |           | magenta     | 3.550549236 |
| ENSMUSG00000021569 | NA            | NA |           | magenta     | 3.54999517  |
| ENSMUSG00000033720 | Sfxn5         |    | 94282     | red         | 3.548127001 |
| ENSMUSG00000083483 | NA            | NA |           | tan         | 3.542014634 |
| ENSMUSG00000080747 | NA            | NA |           | turquoise   | 3.537536416 |
| ENSMUSG00000081455 | NA            | NA |           | red         | 3.534662684 |
| ENSMUSG00000036949 | Slc39a12      |    | 277468    | purple      | 3.516432111 |
| ENSMUSG00000082705 | NA            | NA |           | turquoise   | 3.510120375 |
| ENSMUSG00000032679 | Cd59a         |    | 12509     | yellow      | 3.477706494 |
| ENSMUSG00000020333 | Acsl6         |    | 216739    | red         | 3.475335399 |
| ENSMUSG00000085487 | NA            | NA |           | yellow      | 3.458880569 |
| ENSMUSG00000067321 | NA            | NA |           | red         | 3.450880734 |
| ENSMUSG00000026787 | Gad2          |    | 14417     | brown       | 3.439620241 |
| ENSMUSG00000031765 | Mt1           |    | 17748     | red         | 3.427850682 |
| ENSMUSG00000083353 | NA            | NA |           | cyan        | 3.421864605 |
| ENSMUSG00000083822 | NA            | NA |           | red         | 3.411530285 |
| ENSMUSG00000082674 | NA            | NA |           | red         | 3.409153756 |
| ENSMUSG00000021965 | Ska3          |    | 219114    | magenta     | 3.400747943 |
| ENSMUSG00000028678 | Kif2c         |    | 73804     | magenta     | 3.397758649 |
| ENSMUSG00000072082 | Ccnf          |    | 12449     | magenta     | 3.39748233  |
| ENSMUSG00000055676 | NA            | NA |           | yellow      | 3.395355423 |
| ENSMUSG00000028785 | Hpca          |    | 15444     | turquoise   | 3.389754082 |
| ENSMUSG00000038943 | Prc1          |    | 233406    | magenta     | 3.381260085 |
| ENSMUSG00000031748 | Gnao1         |    | 14681     | red         | 3.379116504 |
| ENSMUSG00000082706 | NA            | NA |           | lightcyan   | 3.374936568 |
| ENSMUSG00000072421 | NA            | NA |           | red         | 3.362234591 |
| ENSMUSG00000022385 | Gtse1         |    | 29870     | magenta     | 3.357015929 |
| ENSMUSG00000029309 | Sparcl1       |    | 13602     | purple      | 3.349335635 |
| ENSMUSG00000080974 | NA            | NA |           | tan         | 3.346488047 |
| ENSMUSG00000030726 | Pold3         |    | 67967     | salmon      | 3.345922534 |
| ENSMUSG00000027309 | 4930402H24Rik |    | 228602    | red         | 3.343234126 |
| ENSMUSG00000079067 | NA            | NA |           | red         | 3.340408373 |
| ENSMUSG00000027962 | Vcam1         |    | 22329     | purple      | 3.334783539 |
| ENSMUSG00000075254 | Heg1          |    | 77446     | black       | 3.334253298 |
| ENSMUSG00000100599 | 1700120C14Rik |    | 73600     | yellow      | 3.332640587 |
| ENSMUSG00000030495 | Slc7a10       |    | 53896     | red         | 3.331002247 |
| ENSMUSG00000087200 | Lrp8os3       |    | 105244644 | turquoise   | 3.330207114 |
| ENSMUSG00000024135 | Srbd1         |    | 78586     | red         | 3.328002694 |
| ENSMUSG00000032883 | Acsl3         |    | 74205     | purple      | 3.324913426 |
| ENSMUSG00000091955 | NA            | NA |           | red         | 3.320649046 |
| ENSMUSG00000046341 | NA            | NA |           | red         | 3.320464849 |

|                    |           |    |        |             |             |
|--------------------|-----------|----|--------|-------------|-------------|
| ENSMUSG00000079037 | Prnp      |    | 19122  | red         | 3.314320065 |
| ENSMUSG00000098713 | NA        | NA |        | tan         | 3.310331769 |
| ENSMUSG00000032181 | Scg3      |    | 20255  | purple      | 3.305212786 |
| ENSMUSG00000027469 | Tpx2      |    | 72119  | magenta     | 3.292928922 |
| ENSMUSG00000014361 | Mertk     |    | 17289  | purple      | 3.291674067 |
| ENSMUSG00000058357 | NA        | NA |        | greenyellow | 3.288740327 |
| ENSMUSG00000031972 | Acta1     |    | 11459  | turquoise   | 3.274954681 |
| ENSMUSG00000028391 | Wdr31     |    | 71354  | blue        | 3.264763905 |
| ENSMUSG00000058135 | Gstm1     |    | 14862  | red         | 3.25585092  |
| ENSMUSG00000107026 | NA        | NA |        | tan         | 3.24716206  |
| ENSMUSG00000020052 | Ascl1     |    | 17172  | purple      | 3.239421912 |
| ENSMUSG00000059033 | NA        | NA |        | tan         | 3.237459478 |
| ENSMUSG00000104514 | NA        | NA |        | pink        | 3.23744295  |
| ENSMUSG00000041219 | Arhgap11a |    | 228482 | magenta     | 3.218506724 |
| ENSMUSG00000021927 | NA        | NA |        | lightcyan   | 3.208839504 |
| ENSMUSG00000082860 | NA        | NA |        | turquoise   | 3.20160896  |
| ENSMUSG00000081622 | NA        | NA |        | red         | 3.192137706 |
| ENSMUSG00000032076 | Cadm1     |    | 54725  | purple      | 3.186390669 |
| ENSMUSG00000045328 | Cenpe     |    | 229841 | magenta     | 3.186241704 |
| ENSMUSG00000099019 | NA        | NA |        | red         | 3.183026653 |
| ENSMUSG00000052192 | NA        | NA |        | tan         | 3.178388879 |
| ENSMUSG00000044201 | Cdc25c    |    | 12532  | magenta     | 3.173681191 |
| ENSMUSG00000089993 | NA        | NA |        | tan         | 3.172048734 |
| ENSMUSG00000029212 | Gabrb1    |    | 14400  | red         | 3.172001714 |
| ENSMUSG00000029521 | Chek2     |    | 50883  | magenta     | 3.162748343 |
| ENSMUSG00000060961 | Slc4a4    |    | 54403  | purple      | 3.156259602 |
| ENSMUSG00000025576 | Rbfox3    |    | 52897  | blue        | 3.156091161 |
| ENSMUSG00000026283 | Ing5      |    | 66262  | blue        | 3.150458428 |
| ENSMUSG00000024833 | Pola2     |    | 18969  | salmon      | 3.146815139 |
| ENSMUSG00000032281 | Acsbg1    |    | 94180  | purple      | 3.140894135 |
| ENSMUSG00000021250 | Fos       |    | 14281  | red         | 3.139438064 |
| ENSMUSG00000024376 | Epb4114a  |    | 13824  | turquoise   | 3.138069592 |
| ENSMUSG00000000632 | Sez6      |    | 20370  | black       | 3.135674789 |
| ENSMUSG00000023015 | Racgap1   |    | 26934  | magenta     | 3.123702731 |
| ENSMUSG00000037108 | Zcwpw1    |    | 381678 | magenta     | 3.120323857 |
| ENSMUSG00000097195 | Snhg5     |    | 72655  | red         | 3.119064356 |
| ENSMUSG00000100441 | NA        | NA |        | tan         | 3.117217667 |
| ENSMUSG00000037845 | NA        | NA |        | pink        | 3.105365034 |
| ENSMUSG00000022132 | Cldn10    |    | 58187  | purple      | 3.10379799  |
| ENSMUSG00000049422 | Chchd10   |    | 103172 | black       | 3.099044092 |
| ENSMUSG00000038486 | Sv2a      |    | 64051  | turquoise   | 3.091113204 |
| ENSMUSG00000107035 | NA        | NA |        | red         | 3.090804685 |
| ENSMUSG00000015112 | Slc25a13  |    | 50799  | turquoise   | 3.08698514  |
| ENSMUSG00000026274 | Pask      |    | 269224 | salmon      | 3.084707046 |
| ENSMUSG00000026249 | Serpine2  |    | 20720  | red         | 3.083600385 |
| ENSMUSG00000102117 | NA        | NA |        | tan         | 3.083289742 |
| ENSMUSG00000025283 | Sat1      |    | 20229  | red         | 3.072825642 |
| ENSMUSG00000034311 | Kif4      |    | 16571  | magenta     | 3.060094451 |
| ENSMUSG00000032087 | Dscaml1   |    | 114873 | turquoise   | 3.059582945 |
| ENSMUSG00000094017 | NA        | NA |        | magenta     | 3.057582417 |
| ENSMUSG00000100514 | NA        | NA |        | turquoise   | 3.053752929 |
| ENSMUSG00000044080 | S100a1    |    | 20193  | red         | 3.051210389 |
| ENSMUSG00000105643 | NA        | NA |        | blue        | 3.048201755 |
| ENSMUSG00000098021 | NA        | NA |        | brown       | 3.047767824 |

|                    |         |        |           |             |
|--------------------|---------|--------|-----------|-------------|
| ENSMUSG00000083394 | NA      | NA     | pink      | 3.04578867  |
| ENSMUSG00000032586 | Traip   | 22036  | magenta   | 3.03365614  |
| ENSMUSG00000035551 | Igfbpl1 | 75426  | cyan      | 3.019368235 |
| ENSMUSG00000020644 | Id2     | 15902  | purple    | 3.005352072 |
| ENSMUSG00000005089 | Slc1a2  | 20511  | red       | 3.001292173 |
| ENSMUSG00000025001 | Hells   | 15201  | salmon    | 3.00042392  |
| ENSMUSG00000037313 | Tacc3   | 21335  | magenta   | 2.999459083 |
| ENSMUSG00000039735 | Fnbp1l  | 214459 | blue      | 2.99780945  |
| ENSMUSG00000059830 | NA      | NA     | salmon    | 2.992193133 |
| ENSMUSG00000056904 | NA      | NA     | red       | 2.99011583  |
| ENSMUSG00000055612 | Cdca7   | 66953  | black     | 2.989256507 |
| ENSMUSG00000082220 | NA      | NA     | tan       | 2.987117919 |
| ENSMUSG00000022332 | Khdrbs3 | 13992  | pink      | 2.980889981 |
| ENSMUSG00000074867 | Zfp808  | 630579 | turquoise | 2.980736327 |
| ENSMUSG00000030397 | Mark4   | 232944 | green     | 2.979394253 |
| ENSMUSG00000039533 | NA      | NA     | red       | 2.975925074 |
| ENSMUSG00000081429 | NA      | NA     | tan       | 2.975607425 |
| ENSMUSG00000029802 | Abcg2   | 26357  | black     | 2.970605517 |
| ENSMUSG00000027447 | Cst3    | 13010  | red       | 2.970128972 |
| ENSMUSG00000108696 | NA      | NA     | cyan      | 2.963273337 |
| ENSMUSG00000028333 | NA      | NA     | red       | 2.962786801 |
| ENSMUSG00000098559 | NA      | NA     | tan       | 2.960953759 |
| ENSMUSG00000028128 | F3      | 14066  | red       | 2.956371739 |
| ENSMUSG00000050555 | Hyls1   | 76832  | magenta   | 2.954153115 |
| ENSMUSG00000095427 | NA      | NA     | red       | 2.94466226  |
| ENSMUSG00000073424 | Cyp4f15 | 106648 | black     | 2.941303971 |
| ENSMUSG00000036790 | Slitrk2 | 245450 | purple    | 2.934706194 |
| ENSMUSG00000027306 | Nusap1  | 108907 | magenta   | 2.928355235 |
| ENSMUSG00000105195 | NA      | NA     | lightcyan | 2.925707952 |
| ENSMUSG00000085791 | NA      | NA     | pink      | 2.924578488 |
| ENSMUSG00000047832 | Cdca4   | 71963  | salmon    | 2.921371906 |
| ENSMUSG00000046636 | NA      | NA     | red       | 2.921098458 |
| ENSMUSG00000020706 | Ftsj3   | 56095  | salmon    | 2.917289412 |
| ENSMUSG00000108528 | NA      | NA     | red       | 2.916024016 |
| ENSMUSG00000036306 | Lzts1   | 211134 | red       | 2.905394679 |
| ENSMUSG00000095865 | NA      | NA     | red       | 2.899085051 |
| ENSMUSG00000091697 | NA      | NA     | pink      | 2.898892133 |
| ENSMUSG00000031808 | Slc27a1 | 26457  | red       | 2.892995971 |
| ENSMUSG00000026473 | Glul    | 14645  | purple    | 2.887099695 |
| ENSMUSG00000081416 | NA      | NA     | tan       | 2.885311861 |
| ENSMUSG00000021553 | Slc28a3 | 114304 | turquoise | 2.880984353 |
| ENSMUSG00000027331 | NA      | NA     | magenta   | 2.880224048 |
| ENSMUSG00000035067 | Xkr6    | 219149 | yellow    | 2.87355208  |
| ENSMUSG00000029638 | Glcci1  | 170772 | turquoise | 2.869646404 |
| ENSMUSG00000033629 | Hacd3   | 57874  | purple    | 2.865830397 |
| ENSMUSG00000035805 | Mlc1    | 170790 | red       | 2.864165371 |
| ENSMUSG00000010064 | Slc38a3 | 76257  | blue      | 2.861735831 |
| ENSMUSG00000064373 | Sepp1   | 20363  | purple    | 2.855932824 |
| ENSMUSG00000002985 | Apoe    | 11816  | red       | 2.853421977 |
| ENSMUSG00000020439 | Smtn    | 29856  | magenta   | 2.851228632 |
| ENSMUSG00000105914 | NA      | NA     | tan       | 2.84387748  |
| ENSMUSG00000091957 | NA      | NA     | red       | 2.842894091 |
| ENSMUSG00000081491 | NA      | NA     | tan       | 2.839297251 |
| ENSMUSG00000033350 | NA      | NA     | purple    | 2.83542124  |

|                    |           |        |           |             |
|--------------------|-----------|--------|-----------|-------------|
| ENSMUSG00000030683 | Sez6l2    | 233878 | turquoise | 2.832338225 |
| ENSMUSG00000081434 | NA        | NA     | tan       | 2.831360335 |
| ENSMUSG00000060128 | NA        | NA     | red       | 2.827610291 |
| ENSMUSG00000007097 | Atp1a2    | 98660  | purple    | 2.823737351 |
| ENSMUSG00000038252 | Ncapd2    | 68298  | magenta   | 2.822209195 |
| ENSMUSG00000062510 | Nsl1      | 381318 | magenta   | 2.820045122 |
| ENSMUSG00000093897 | NA        | NA     | turquoise | 2.819034471 |
| ENSMUSG00000082186 | NA        | NA     | turquoise | 2.816052084 |
| ENSMUSG00000036882 | Arhgap33  | 233071 | magenta   | 2.812079663 |
| ENSMUSG00000028718 | Stil      | 20460  | magenta   | 2.812052417 |
| ENSMUSG00000026223 | Itm2c     | 64294  | red       | 2.811435647 |
| ENSMUSG00000027827 | Kcnab1    | 16497  | cyan      | 2.808844443 |
| ENSMUSG00000063816 | NA        | NA     | tan       | 2.8076866   |
| ENSMUSG00000000567 | Sox9      | 20682  | red       | 2.803602124 |
| ENSMUSG00000081738 | NA        | NA     | red       | 2.797516509 |
| ENSMUSG00000064231 | NA        | NA     | tan       | 2.796152537 |
| ENSMUSG00000058773 | Hist1h1b  | 56702  | magenta   | 2.795599897 |
| ENSMUSG00000081394 | Gm13215   | 664894 | tan       | 2.795298648 |
| ENSMUSG00000024989 | Cep55     | 74107  | magenta   | 2.794121914 |
| ENSMUSG00000083569 | NA        | NA     | tan       | 2.793537395 |
| ENSMUSG00000063297 | NA        | NA     | red       | 2.793172055 |
| ENSMUSG00000070271 | NA        | NA     | tan       | 2.790638899 |
| ENSMUSG00000056394 | Lig1      | 16881  | salmon    | 2.790124728 |
| ENSMUSG00000028517 | Plpp3     | 67916  | red       | 2.786819048 |
| ENSMUSG00000000202 | NA        | NA     | red       | 2.785975834 |
| ENSMUSG00000105147 | NA        | NA     | tan       | 2.785300855 |
| ENSMUSG00000092281 | NA        | NA     | red       | 2.78290683  |
| ENSMUSG00000028896 | Rcc1      | 100088 | salmon    | 2.782745181 |
| ENSMUSG00000031949 | Adat1     | 30947  | pink      | 2.778772787 |
| ENSMUSG00000082596 | NA        | NA     | turquoise | 2.763553264 |
| ENSMUSG00000020167 | Tcf3      | 21423  | red       | 2.763302351 |
| ENSMUSG00000108107 | NA        | NA     | tan       | 2.757742723 |
| ENSMUSG00000062758 | NA        | NA     | tan       | 2.757236315 |
| ENSMUSG00000082809 | NA        | NA     | red       | 2.752029324 |
| ENSMUSG00000023913 | Pla2g7    | 27226  | purple    | 2.751919302 |
| ENSMUSG00000066800 | Rnasel    | 24014  | blue      | 2.747753851 |
| ENSMUSG00000020614 | Fam20a    | 208659 | purple    | 2.746313228 |
| ENSMUSG00000096755 | NA        | NA     | tan       | 2.743537066 |
| ENSMUSG00000083007 | NA        | NA     | tan       | 2.738911553 |
| ENSMUSG00000007050 | Lsm2      | 27756  | salmon    | 2.736105893 |
| ENSMUSG00000054252 | Fgfr3     | 14184  | green     | 2.735070928 |
| ENSMUSG00000032218 | Ccnb2     | 12442  | magenta   | 2.73029233  |
| ENSMUSG00000058254 | Tspan7    | 21912  | purple    | 2.726918786 |
| ENSMUSG00000030528 | Blm       | 12144  | salmon    | 2.725948648 |
| ENSMUSG00000035024 | Ncapd3    | 78658  | magenta   | 2.722358873 |
| ENSMUSG00000100720 | NA        | NA     | red       | 2.722110473 |
| ENSMUSG00000058290 | Espl1     | 105988 | magenta   | 2.722040201 |
| ENSMUSG00000068604 | NA        | NA     | tan       | 2.721953641 |
| ENSMUSG00000026708 | Cenpl     | 70454  | magenta   | 2.721546792 |
| ENSMUSG00000107591 | NA        | NA     | tan       | 2.719506652 |
| ENSMUSG00000070713 | NA        | NA     | red       | 2.717964583 |
| ENSMUSG00000052544 | NA        | NA     | turquoise | 2.716640763 |
| ENSMUSG00000042462 | Dctpp1    | 66422  | salmon    | 2.710130324 |
| ENSMUSG00000044469 | Tnfaip8l1 | 66443  | magenta   | 2.709420971 |

|                    |         |        |              |             |
|--------------------|---------|--------|--------------|-------------|
| ENSMUSG00000074034 | NA      | NA     | red          | 2.705517363 |
| ENSMUSG00000091742 | NA      | NA     | grey60       | 2.704296913 |
| ENSMUSG00000101875 | NA      | NA     | tan          | 2.702669672 |
| ENSMUSG00000104126 | NA      | NA     | red          | 2.700003785 |
| ENSMUSG00000017999 | Ddx27   | 228889 | red          | 2.693892742 |
| ENSMUSG00000019872 | Smpdl3a | 57319  | purple       | 2.692109662 |
| ENSMUSG00000005360 | Slc1a3  | 20512  | purple       | 2.689880743 |
| ENSMUSG00000040429 | Mterf1a | 545725 | midnightblue | 2.689030711 |
| ENSMUSG00000082570 | NA      | NA     | yellow       | 2.687599997 |
| ENSMUSG00000102478 | NA      | NA     | turquoise    | 2.686515371 |
| ENSMUSG00000086697 | NA      | NA     | cyan         | 2.685516148 |
| ENSMUSG00000028010 | Gar1    | 68147  | red          | 2.684996531 |
| ENSMUSG00000066116 | NA      | NA     | tan          | 2.68365773  |
| ENSMUSG00000017009 | Sdc4    | 20971  | black        | 2.680536331 |
| ENSMUSG00000061080 | Lsamp   | 268890 | red          | 2.680147621 |
| ENSMUSG00000000740 | Rpl13   | 270106 | black        | 2.676686338 |
| ENSMUSG00000063875 | NA      | NA     | tan          | 2.674900311 |
| ENSMUSG00000090460 | NA      | NA     | pink         | 2.671093025 |
| ENSMUSG00000032482 | Cspg5   | 29873  | red          | 2.667216418 |
| ENSMUSG00000032815 | Fanca   | 14087  | magenta      | 2.665111642 |
| ENSMUSG00000082052 | NA      | NA     | turquoise    | 2.658179323 |

**Table S4** Top 10% DVC genes (astrocytes vs NSCs) in the second data set

| EnsembleID          | Symbol | GeneID    | Module         | STS       |
|---------------------|--------|-----------|----------------|-----------|
| ENSMUSG00000050953  | Gja1   | 14609     | yellow         | 3.5646968 |
| ENSMUSG00000017009  | Sdc4   | 20971     | turquoise      | 3.3772484 |
| ENSMUSG000000031765 | Mt1    | 17748     | pink           | 3.2017043 |
| ENSMUSG000000031760 | Mt3    | 17751     | pink           | 2.8841864 |
| ENSMUSG000000057113 | Npm1   | 18148     | pink           | 2.7707265 |
| ENSMUSG000000005732 | NA     | NA        | pink           | 2.65097   |
| ENSMUSG000000081051 | NA     | NA        | skyblue        | 2.6264622 |
| ENSMUSG000000002985 | Apoe   | 11816     | pink           | 2.5352692 |
| ENSMUSG000000062078 | Qk     | 19317     | lightcyan      | 2.5283838 |
| ENSMUSG000000017390 | Aldoc  | 11676     | pink           | 2.5004379 |
| ENSMUSG000000006728 | NA     | NA        | pink           | 2.446028  |
| ENSMUSG000000062761 | Zfp512 | 269639    | darkgrey       | 2.4153708 |
| ENSMUSG000000025283 | Sat1   | 20229     | turquoise      | 2.3866319 |
| ENSMUSG000000014355 | Anapc1 | 17222     | royalblue      | 2.3282775 |
| ENSMUSG000000000959 | Oxa1l  | 69089     | darkolivegreen | 2.2581937 |
| ENSMUSG000000107176 | Gm9794 | 100042008 | skyblue        | 2.243752  |
| ENSMUSG000000035337 | Uchl4  | 93841     | white          | 2.1854898 |
| ENSMUSG000000068391 | Chrac1 | 93696     | steelblue      | 2.1811146 |
| ENSMUSG000000028517 | Plpp3  | 67916     | turquoise      | 2.1782499 |
| ENSMUSG000000021178 | Psmc1  | 19179     | pink           | 2.1484992 |
| ENSMUSG000000016028 | Celsr1 | 12614     | white          | 2.1455575 |
| ENSMUSG000000095597 | NA     | NA        | skyblue        | 2.1452022 |
| ENSMUSG000000038900 | NA     | NA        | green          | 2.1419999 |
| ENSMUSG000000034462 | Pkd2   | 18764     | purple         | 2.1201014 |
| ENSMUSG000000051989 | Smim11 | 68936     | white          | 2.1178537 |
| ENSMUSG000000037706 | Cd81   | 12520     | violet         | 2.1039375 |
| ENSMUSG000000005089 | Slc1a2 | 20511     | greenyellow    | 2.1005695 |
| ENSMUSG000000032301 | Psma4  | 26441     | darkmagenta    | 2.0674122 |
| ENSMUSG000000005899 | Smpd4  | 77626     | steelblue      | 2.0543293 |
| ENSMUSG000000029516 | Cit    | 12704     | pink           | 2.0406884 |
| ENSMUSG000000033364 | Usp37  | 319651    | pink           | 2.0389852 |
| ENSMUSG000000025134 | NA     | NA        | pink           | 2.0348324 |
| ENSMUSG000000079037 | Prnp   | 19122     | turquoise      | 2.0328562 |
| ENSMUSG000000029687 | Ezh2   | 14056     | pink           | 2.0252812 |
| ENSMUSG000000036636 | Clcn7  | 26373     | violet         | 2.0233221 |



|                    |          |           |               |           |
|--------------------|----------|-----------|---------------|-----------|
| ENSMUSG00000059195 | NA       | NA        | skyblue       | 2.0180409 |
| ENSMUSG00000018736 | Ndel1    | 83431     | steelblue     | 2.0115937 |
| ENSMUSG00000022205 | Sub1     | 20024     | turquoise     | 1.9948428 |
| ENSMUSG00000034349 | Smc4     | 70099     | midnightblue  | 1.9872107 |
| ENSMUSG00000021631 | NA       | NA        | white         | 1.982543  |
| ENSMUSG00000031320 | Rps4x    | 20102     | tan           | 1.9740862 |
| ENSMUSG00000054717 | Hmgb2    | 97165     | pink          | 1.9661788 |
| ENSMUSG00000020873 | NA       | NA        | lightcyan     | 1.939419  |
| ENSMUSG00000062647 | Rpl7a    | 27176     | pink          | 1.9261512 |
| ENSMUSG00000002052 | Supt6    | 20926     | violet        | 1.9163723 |
| ENSMUSG00000001289 | NA       | NA        | royalblue     | 1.9073131 |
| ENSMUSG00000005615 | Pcyt1a   | 13026     | darkorange    | 1.9028645 |
| ENSMUSG00000060036 | Rpl3     | 27367     | turquoise     | 1.8976807 |
| ENSMUSG00000003161 | Sri      | 109552    | green         | 1.8966547 |
| ENSMUSG00000038965 | Ube2l3   | 22195     | sienna3       | 1.8915379 |
| ENSMUSG00000026424 | Gpr37l1  | 171469    | pink          | 1.8805077 |
| ENSMUSG00000030232 | Aebp2    | 11569     | darkred       | 1.8755137 |
| ENSMUSG00000092341 | Malat1   | 72289     | turquoise     | 1.8707854 |
| ENSMUSG00000078193 | NA       | NA        | skyblue       | 1.867945  |
| ENSMUSG00000031782 | Coq9     | 67914     | lightcyan     | 1.853239  |
| ENSMUSG00000061477 | Rps7     | 20115     | skyblue       | 1.8519863 |
| ENSMUSG00000021024 | PsmA6    | 26443     | skyblue       | 1.8451426 |
| ENSMUSG00000039830 | Olig2    | 50913     | red           | 1.8371826 |
| ENSMUSG00000032399 | Rpl4     | 67891     | turquoise     | 1.8370653 |
| ENSMUSG00000001525 | Tubb5    | 22154     | pink          | 1.821465  |
| ENSMUSG00000058254 | Tspan7   | 21912     | yellow        | 1.812039  |
| ENSMUSG00000071041 | Gm15210  | 100042069 | midnightblue  | 1.8112323 |
| ENSMUSG00000049832 | NA       | NA        | skyblue       | 1.8034339 |
| ENSMUSG00000035139 | Secisbp2 | 75420     | darkturquoise | 1.7914933 |
| ENSMUSG00000025178 | Pi4k2a   | 84095     | orange        | 1.7897909 |
| ENSMUSG00000027447 | Cst3     | 13010     | yellow        | 1.7859036 |
| ENSMUSG00000046434 | Hnrnpa1  | 15382     | turquoise     | 1.7745258 |
| ENSMUSG00000043801 | NA       | NA        | skyblue       | 1.7737354 |
| ENSMUSG00000026568 | Mpc2     | 70456     | darkmagenta   | 1.7623615 |
| ENSMUSG00000021395 | Spin1    | 20729     | pink          | 1.7609724 |
| ENSMUSG00000082431 | NA       | NA        | skyblue       | 1.760569  |
| ENSMUSG00000003033 | Ap1m1    | 11767     | yellowgreen   | 1.7557961 |
| ENSMUSG00000019984 | Med23    | 70208     | paleturquoise | 1.7544881 |
| ENSMUSG00000061787 | Rps17    | 20068     | turquoise     | 1.7452645 |
| ENSMUSG00000033705 | Stard9   | 668880    | yellowgreen   | 1.7390533 |

|                    |           |        |               |           |
|--------------------|-----------|--------|---------------|-----------|
| ENSMUSG00000029309 | Sparcl1   | 13602  | pink          | 1.7363851 |
| ENSMUSG00000021243 | Fcf1      | 73736  | darkmagenta   | 1.7260795 |
| ENSMUSG00000027763 | Mbnl1     | 56758  | violet        | 1.7237043 |
| ENSMUSG00000032826 | Ank2      | 109676 | grey60        | 1.7216896 |
| ENSMUSG00000005469 | Prkaca    | 18747  | darkturquoise | 1.721581  |
| ENSMUSG00000021709 | Erbp2ip   | 59079  | yellow        | 1.7162477 |
| ENSMUSG00000099764 | NA        | NA     | skyblue       | 1.7130798 |
| ENSMUSG00000003316 | Glg1      | 20340  | darkorange    | 1.7050441 |
| ENSMUSG00000041890 | Git2      | 26431  | yellowgreen   | 1.7027712 |
| ENSMUSG00000098912 | NA        | NA     | cyan          | 1.6892484 |
| ENSMUSG00000024997 | Prdx3     | 11757  | steelblue     | 1.6889376 |
| ENSMUSG00000005813 | Metap1    | 75624  | tan           | 1.6867332 |
| ENSMUSG00000017176 | Nt5c3b    | 68106  | darkmagenta   | 1.6851134 |
| ENSMUSG00000004897 | Hdgf      | 15191  | pink          | 1.6840375 |
| ENSMUSG00000022111 | Uchl3     | 50933  | white         | 1.6792812 |
| ENSMUSG00000061474 | Mrps36    | 66128  | white         | 1.6764093 |
| ENSMUSG00000044408 | Sptssa    | 104725 | magenta       | 1.6740227 |
| ENSMUSG00000026219 | Trip12    | 14897  | violet        | 1.6728916 |
| ENSMUSG00000037894 | H2afz     | 51788  | pink          | 1.6707899 |
| ENSMUSG00000094530 | NA        | NA     | skyblue       | 1.6665371 |
| ENSMUSG00000033486 | Catsper2  | 212670 | violet        | 1.6584732 |
| ENSMUSG00000018076 | Med13l    | 76199  | darkorange    | 1.6576111 |
| ENSMUSG00000018707 | Dync1h1   | 13424  | royalblue     | 1.6477687 |
| ENSMUSG00000067161 | NA        | NA     | brown         | 1.6460921 |
| ENSMUSG00000033306 | Lpp       | 210126 | cyan          | 1.6442403 |
| ENSMUSG00000025423 | Pias2     | 17344  | purple        | 1.6412701 |
| ENSMUSG00000042396 | Rbm7      | 67010  | sienna3       | 1.6389324 |
| ENSMUSG00000002477 | Snrpd1    | 20641  | pink          | 1.6296479 |
| ENSMUSG00000045128 | Rpl18a    | 76808  | turquoise     | 1.6254366 |
| ENSMUSG00000037098 | Rab11fip3 | 215445 | yellowgreen   | 1.6210833 |
| ENSMUSG00000039067 | Psmc7     | 17463  | greenyellow   | 1.6207424 |
| ENSMUSG00000019179 | Mdh2      | 17448  | magenta       | 1.6187186 |
| ENSMUSG00000040327 | Cul9      | 78309  | sienna3       | 1.6155576 |
| ENSMUSG00000032482 | Cspg5     | 29873  | pink          | 1.6140931 |
| ENSMUSG00000047935 | Gm5607    | 434280 | pink          | 1.6090306 |
| ENSMUSG00000100215 | NA        | NA     | turquoise     | 1.6087668 |
| ENSMUSG00000024109 | Nrxn1     | 18189  | white         | 1.607871  |
| ENSMUSG00000010453 | Kansl3    | 226976 | darkgreen     | 1.6067174 |
| ENSMUSG00000080904 | NA        | NA     | white         | 1.604205  |
| ENSMUSG00000061080 | Lsamp     | 268890 | pink          | 1.5946526 |

|                    |         |        |               |           |
|--------------------|---------|--------|---------------|-----------|
| ENSMUSG00000066407 | NA      | NA     | turquoise     | 1.5937884 |
| ENSMUSG00000032112 | Trappc4 | 60409  | darkmagenta   | 1.5863174 |
| ENSMUSG00000023452 | Pisd    | 320951 | purple        | 1.5824938 |
| ENSMUSG00000029649 | NA      | NA     | darkgrey      | 1.5785003 |
| ENSMUSG00000038762 | Abcf1   | 224742 | royalblue     | 1.5755856 |
| ENSMUSG00000000751 | Rpa1    | 68275  | darkturquoise | 1.5692585 |
| ENSMUSG00000051695 | Pcbp1   | 23983  | pink          | 1.5622152 |
| ENSMUSG00000035293 | G2e3    | 217558 | royalblue     | 1.5621205 |
| ENSMUSG00000020923 | Ubtf    | 21429  | cyan          | 1.5595313 |
| ENSMUSG00000025967 | Eef1b2  | 55949  | pink          | 1.5532577 |
| ENSMUSG00000048170 | Mcmbp   | 210711 | skyblue       | 1.5505443 |
| ENSMUSG00000000600 | Krit1   | 79264  | darkmagenta   | 1.5503157 |
| ENSMUSG00000012483 | Rpa3    | 68240  | pink          | 1.5492588 |
| ENSMUSG00000017428 | Psm11   | 69077  | violet        | 1.5487739 |
| ENSMUSG00000024668 | Sdhaf2  | 66072  | darkgrey      | 1.5482145 |
| ENSMUSG00000000567 | Sox9    | 20682  | blue          | 1.5465592 |
| ENSMUSG00000041057 | Wdr43   | 72515  | tan           | 1.5459679 |
| ENSMUSG00000031808 | Slc27a1 | 26457  | pink          | 1.542587  |
| ENSMUSG00000027187 | Cat     | 12359  | cyan          | 1.5320281 |
| ENSMUSG00000024454 | Hdac3   | 15183  | sienna3       | 1.5318044 |
| ENSMUSG00000090862 | Rps13   | 68052  | pink          | 1.530746  |
| ENSMUSG00000086922 | NA      | NA     | royalblue     | 1.5275636 |
| ENSMUSG00000085939 | NA      | NA     | lightgreen    | 1.5258293 |
| ENSMUSG00000078974 | Sec61g  | 20335  | skyblue       | 1.5245955 |
| ENSMUSG00000044533 | Rps2    | 16898  | yellow        | 1.5218279 |
| ENSMUSG00000008668 | Rps18   | 20084  | turquoise     | 1.5187339 |
| ENSMUSG00000000184 | Ccnd2   | 12444  | blue          | 1.5182482 |
| ENSMUSG00000025451 | Paip1   | 218693 | tan           | 1.5144495 |
| ENSMUSG00000043483 | NA      | NA     | saddlebrown   | 1.5053496 |
| ENSMUSG00000059070 | Rpl18   | 19899  | pink          | 1.4990481 |
| ENSMUSG00000004642 | Slbp    | 20492  | skyblue       | 1.4977042 |
| ENSMUSG00000002733 | Plekha3 | 83435  | paleturquoise | 1.4971499 |
| ENSMUSG00000029394 | Cdk2ap1 | 13445  | red           | 1.4964807 |
| ENSMUSG00000032178 | Ilf3    | 16201  | green         | 1.4938631 |
| ENSMUSG00000039221 | Rpl22l1 | 68028  | pink          | 1.4925995 |
| ENSMUSG00000025151 | Maged1  | 94275  | pink          | 1.4889162 |
| ENSMUSG00000069744 | Psm3    | 26446  | pink          | 1.4869624 |
| ENSMUSG00000030751 | Psm1    | 26440  | pink          | 1.4859125 |
| ENSMUSG00000027663 | Zmat3   | 22401  | orange        | 1.4855573 |
| ENSMUSG00000027342 | Pcna    | 18538  | pink          | 1.4843559 |

|                    |          |        |                |           |
|--------------------|----------|--------|----------------|-----------|
| ENSMUSG00000008682 | Rpl10    | 110954 | pink           | 1.4827869 |
| ENSMUSG00000029838 | NA       | NA     | pink           | 1.4811479 |
| ENSMUSG00000031987 | Egln1    | 112405 | lightcyan      | 1.4780892 |
| ENSMUSG00000027566 | Psm7     | 26444  | green          | 1.4778559 |
| ENSMUSG00000062825 | Actg1    | 11465  | pink           | 1.4778259 |
| ENSMUSG00000046111 | Cep295   | 319675 | midnightblue   | 1.4729867 |
| ENSMUSG00000038119 | Cdon     | 57810  | yellow         | 1.4729004 |
| ENSMUSG00000037461 | NA       | NA     | white          | 1.4724504 |
| ENSMUSG00000057778 | Cyb5d2   | 192986 | black          | 1.4716832 |
| ENSMUSG00000062981 | Mrpl42   | 67270  | midnightblue   | 1.4708033 |
| ENSMUSG00000039771 | Polr2j   | 20022  | darkmagenta    | 1.4695928 |
| ENSMUSG00000028218 | Fam92a   | 68099  | darkred        | 1.4671334 |
| ENSMUSG00000024142 | Mlst8    | 56716  | steelblue      | 1.4669422 |
| ENSMUSG00000063556 | NA       | NA     | turquoise      | 1.4665201 |
| ENSMUSG00000026933 | Camsap1  | 227634 | red            | 1.4663462 |
| ENSMUSG00000038485 | Socs7    | 192157 | saddlebrown    | 1.4649865 |
| ENSMUSG00000026032 | NA       | NA     | saddlebrown    | 1.4599836 |
| ENSMUSG00000078812 | Eif5a    | 276770 | pink           | 1.4579247 |
| ENSMUSG00000106106 | NA       | NA     | blue           | 1.4565444 |
| ENSMUSG00000035011 | Zbtb7a   | 16969  | cyan           | 1.4550559 |
| ENSMUSG00000030127 | Cops7a   | 26894  | purple         | 1.4527287 |
| ENSMUSG00000028452 | Vcp      | 269523 | brown          | 1.4520892 |
| ENSMUSG00000003131 | Pafah1b2 | 18475  | midnightblue   | 1.4498924 |
| ENSMUSG00000017404 | Rpl19    | 19921  | turquoise      | 1.4485057 |
| ENSMUSG00000039533 | NA       | NA     | turquoise      | 1.4481614 |
| ENSMUSG00000027012 | Dync1i2  | 13427  | turquoise      | 1.4463912 |
| ENSMUSG00000032526 | Deb1     | 26901  | royalblue      | 1.4459145 |
| ENSMUSG00000040040 | Ift88    | 21821  | black          | 1.445694  |
| ENSMUSG00000026643 | Nmt2     | 18108  | pink           | 1.4446816 |
| ENSMUSG00000073639 | NA       | NA     | steelblue      | 1.443428  |
| ENSMUSG00000003226 | Ranbp2   | 19386  | greenyellow    | 1.442941  |
| ENSMUSG00000028906 | Epb41    | 269587 | darkolivegreen | 1.4416959 |
| ENSMUSG00000074698 | Csnk2a1  | 12995  | paleturquoise  | 1.4414821 |
| ENSMUSG00000032264 | Zw10     | 26951  | black          | 1.4399636 |
| ENSMUSG00000004880 | Lbr      | 98386  | pink           | 1.4394902 |
| ENSMUSG00000053477 | Tcf4     | 21413  | blue           | 1.4328254 |
| ENSMUSG00000008435 | Rdh13    | 108841 | darkmagenta    | 1.4304813 |
| ENSMUSG00000035215 | Lsm7     | 66094  | tan            | 1.4293766 |
| ENSMUSG00000024878 | Cbwd1    | 226043 | tan            | 1.4266492 |
| ENSMUSG00000101939 | NA       | NA     | skyblue        | 1.4253496 |

|                    |               |        |               |           |
|--------------------|---------------|--------|---------------|-----------|
| ENSMUSG00000020122 | Egfr          | 13649  | blue          | 1.4232259 |
| ENSMUSG00000038301 | Snx10         | 71982  | orange        | 1.4224711 |
| ENSMUSG00000067274 | Rplp0         | 11837  | pink          | 1.4222594 |
| ENSMUSG00000033307 | Mif           | 17319  | pink          | 1.4188005 |
| ENSMUSG00000039850 | Endov         | 338371 | green         | 1.416169  |
| ENSMUSG00000031302 | NA            | NA     | darkorange    | 1.4155166 |
| ENSMUSG00000038274 | Fau           | 14109  | green         | 1.4131639 |
| ENSMUSG00000066148 | Prpf4         | 70052  | darkmagenta   | 1.4100214 |
| ENSMUSG00000029580 | Actb          | 11461  | skyblue       | 1.4074466 |
| ENSMUSG00000033392 | Clasp2        | 76499  | plum1         | 1.4046215 |
| ENSMUSG00000025868 | Higd2a        | 67044  | yellowgreen   | 1.4029155 |
| ENSMUSG00000029669 | Tspan12       | 269831 | steelblue     | 1.4025275 |
| ENSMUSG00000039943 | Plcb4         | 18798  | yellowgreen   | 1.4004384 |
| ENSMUSG00000015597 | Zfp318        | 57908  | darkorange    | 1.3982663 |
| ENSMUSG00000030536 | Iqgap1        | 29875  | pink          | 1.3958375 |
| ENSMUSG00000026335 | Pam           | 18484  | skyblue       | 1.3951747 |
| ENSMUSG00000030310 | Slc6a1        | 232333 | brown         | 1.3945056 |
| ENSMUSG00000073155 | 1810058I24Rik | 67705  | brown         | 1.3899286 |
| ENSMUSG00000001674 | Ddx18         | 66942  | turquoise     | 1.3829771 |
| ENSMUSG00000033128 | Gga1          | 106039 | salmon        | 1.380795  |
| ENSMUSG00000059363 | Fxn           | 14297  | black         | 1.3807847 |
| ENSMUSG00000040464 | Gtpbp10       | 207704 | midnightblue  | 1.3803227 |
| ENSMUSG00000009927 | Rps25         | 75617  | turquoise     | 1.3791224 |
| ENSMUSG00000039735 | Fnbp11        | 214459 | red           | 1.3788516 |
| ENSMUSG00000022051 | Bnip3l        | 12177  | lightyellow   | 1.3776416 |
| ENSMUSG00000038039 | Gcc2          | 70297  | darkmagenta   | 1.3736492 |
| ENSMUSG00000040681 | NA            | NA     | blue          | 1.3729577 |
| ENSMUSG00000059981 | Taok2         | 381921 | cyan          | 1.3722362 |
| ENSMUSG00000083899 | NA            | NA     | royalblue     | 1.3711707 |
| ENSMUSG00000040725 | Hnrnpul1      | 232989 | pink          | 1.3668672 |
| ENSMUSG00000056153 | Socs6         | 54607  | pink          | 1.3659384 |
| ENSMUSG00000038178 | Slc43a2       | 215113 | darkturquoise | 1.3653265 |
| ENSMUSG00000053332 | Gas5          | 14455  | blue          | 1.3635269 |
| ENSMUSG00000002280 | Narfl         | 67563  | black         | 1.36152   |
| ENSMUSG00000040025 | Ythdf2        | 213541 | blue          | 1.3606418 |
| ENSMUSG00000074519 | Etohi1        | 626848 | white         | 1.3546771 |
| ENSMUSG00000039542 | Ncam1         | 17967  | darkorange    | 1.354619  |
| ENSMUSG00000027805 | Pfn2          | 18645  | yellow        | 1.3531555 |
| ENSMUSG00000044285 | NA            | NA     | turquoise     | 1.353135  |
| ENSMUSG00000032026 | Rexo2         | 104444 | plum1         | 1.3494758 |

|                    |            |        |             |           |
|--------------------|------------|--------|-------------|-----------|
| ENSMUSG00000018340 | Anxa6      | 11749  | yellowgreen | 1.3479949 |
| ENSMUSG00000062006 | Rpl34      | 68436  | skyblue     | 1.3477534 |
| ENSMUSG00000028416 | Bag1       | 12017  | purple      | 1.3466161 |
| ENSMUSG00000008683 | Rps15a     | 267019 | blue        | 1.3464045 |
| ENSMUSG00000061559 | Wdr61      | 66317  | plum1       | 1.3452308 |
| ENSMUSG00000031918 | Mtmr2      | 77116  | skyblue     | 1.3422305 |
| ENSMUSG00000029387 | Gtf2h3     | 209357 | green       | 1.3384565 |
| ENSMUSG00000084208 | NA         | NA     | steelblue   | 1.3375962 |
| ENSMUSG00000094344 | NA         | NA     | turquoise   | 1.3374499 |
| ENSMUSG00000024579 | Pcyox1l    | 240334 | darkgrey    | 1.3368947 |
| ENSMUSG00000031422 | Morf4l2    | 56397  | darkgrey    | 1.3341574 |
| ENSMUSG00000040225 | Prrc2c     | 226562 | blue        | 1.3339585 |
| ENSMUSG00000037958 | Nsrp1      | 237859 | darkmagenta | 1.3330242 |
| ENSMUSG00000030213 | Atf7ip     | 54343  | darkgrey    | 1.3311789 |
| ENSMUSG00000020349 | NA         | NA     | plum1       | 1.3302277 |
| ENSMUSG00000026082 | Rev1       | 56210  | darkmagenta | 1.3297806 |
| ENSMUSG00000018666 | Cbx1       | 12412  | pink        | 1.3284145 |
| ENSMUSG00000027404 | Snrpb      | 20638  | pink        | 1.3271492 |
| ENSMUSG00000031516 | Dctn6      | 22428  | lightcyan   | 1.3223009 |
| ENSMUSG00000042744 | Gm15800    | 269700 | purple      | 1.3216483 |
| ENSMUSG00000030410 | Dmwd       | 13401  | black       | 1.3206794 |
| ENSMUSG00000035401 | Emsy       | 233545 | black       | 1.3203723 |
| ENSMUSG00000071054 | Safb       | 224903 | tan         | 1.3183761 |
| ENSMUSG00000038000 | Acd        | 497652 | yellow      | 1.3165969 |
| ENSMUSG00000025873 | Faf2       | 76577  | orange      | 1.3161702 |
| ENSMUSG00000020644 | Id2        | 15902  | pink        | 1.3154734 |
| ENSMUSG00000019362 | D8Ertd738e | 101966 | pink        | 1.3133768 |
| ENSMUSG00000020462 | Cfap36     | 216618 | brown       | 1.3125856 |
| ENSMUSG00000090100 | Ttbk2      | 140810 | purple      | 1.3125174 |
| ENSMUSG00000022370 | NA         | NA     | tan         | 1.3106441 |
| ENSMUSG00000063810 | Alms1      | 236266 | violet      | 1.3071847 |
| ENSMUSG00000030759 | Far1       | 67420  | sienna3     | 1.3066412 |
| ENSMUSG00000079435 | Rpl36a     | 19982  | skyblue     | 1.3060617 |
| ENSMUSG00000004945 | Tmem242    | 70544  | white       | 1.304854  |
| ENSMUSG00000012405 | Rpl15      | 66480  | turquoise   | 1.2997701 |
| ENSMUSG00000026740 | Dnajc1     | 13418  | steelblue   | 1.2995308 |
| ENSMUSG00000060739 | Nsa2       | 59050  | skyblue     | 1.2976455 |
| ENSMUSG00000022400 | Rbx1       | 56438  | skyblue     | 1.2962526 |
| ENSMUSG00000037805 | Rpl10a     | 19896  | tan         | 1.2962162 |
| ENSMUSG00000089782 | NA         | NA     | yellow      | 1.2949825 |

|                    |          |           |                |           |
|--------------------|----------|-----------|----------------|-----------|
| ENSMUSG00000029472 | Anapc5   | 59008     | steelblue      | 1.2925565 |
| ENSMUSG00000038886 | Man2a2   | 140481    | skyblue3       | 1.2924834 |
| ENSMUSG00000022820 | NA       | NA        | skyblue        | 1.2921015 |
| ENSMUSG00000025915 | NA       | NA        | lightyellow    | 1.2885649 |
| ENSMUSG00000036834 | Plch1    | 269437    | white          | 1.2879018 |
| ENSMUSG00000025613 | Cct8     | 12469     | green          | 1.285772  |
| ENSMUSG00000032186 | Tmod2    | 50876     | purple         | 1.2854617 |
| ENSMUSG00000050144 | Slc25a44 | 229517    | red            | 1.2842844 |
| ENSMUSG00000042541 | NA       | NA        | green          | 1.2842153 |
| ENSMUSG00000001018 | Snapin   | 20615     | royalblue      | 1.2824264 |
| ENSMUSG00000031762 | Mt2      | 17750     | pink           | 1.2809953 |
| ENSMUSG00000029821 | Dfna5    | 54722     | greenyellow    | 1.2806856 |
| ENSMUSG00000083992 | Gm11478  | 100504632 | turquoise      | 1.2792029 |
| ENSMUSG00000036438 | Calm2    | 12314     | turquoise      | 1.2778393 |
| ENSMUSG00000031447 | Lamp1    | 16783     | orange         | 1.2762663 |
| ENSMUSG00000031010 | Usp9x    | 22284     | yellow         | 1.2751745 |
| ENSMUSG00000030209 | Grin2b   | 14812     | tan            | 1.2751483 |
| ENSMUSG00000006315 | Tmem147  | 69804     | darkmagenta    | 1.2747019 |
| ENSMUSG00000028757 | Ddost    | 13200     | green          | 1.273239  |
| ENSMUSG00000031878 | Nae1     | 234664    | black          | 1.2723823 |
| ENSMUSG00000063870 | Chd4     | 107932    | green          | 1.2722973 |
| ENSMUSG00000014294 | Ndufa2   | 17991     | green          | 1.2712814 |
| ENSMUSG00000014504 | Srp19    | 66384     | pink           | 1.2712184 |
| ENSMUSG00000022517 | Mgrn1    | 17237     | purple         | 1.2668105 |
| ENSMUSG00000068039 | Tcp1     | 21454     | royalblue      | 1.2649924 |
| ENSMUSG00000051510 | NA       | NA        | purple         | 1.263511  |
| ENSMUSG00000054199 | Gon4l    | 76022     | violet         | 1.2621578 |
| ENSMUSG00000057738 | Sptan1   | 20740     | darkolivegreen | 1.2618182 |
| ENSMUSG00000020591 | Ntsr2    | 18217     | pink           | 1.2611214 |
| ENSMUSG00000033981 | NA       | NA        | pink           | 1.2598102 |
| ENSMUSG00000025816 | Sec61a2  | 57743     | darkolivegreen | 1.2593412 |
| ENSMUSG00000048164 | NA       | NA        | skyblue        | 1.2577954 |
| ENSMUSG00000098274 | Rpl24    | 68193     | red            | 1.2544696 |
| ENSMUSG00000017421 | Zfp207   | 22680     | blue           | 1.2538854 |
| ENSMUSG00000084786 | Ubl5     | 66177     | yellow         | 1.2528421 |
| ENSMUSG00000031508 | Ankrd10  | 102334    | sienna3        | 1.251878  |
| ENSMUSG00000029616 | NA       | NA        | royalblue      | 1.2512402 |
| ENSMUSG00000039844 | Rapgef1  | 107746    | yellow         | 1.250168  |
| ENSMUSG00000047675 | Rps8     | 20116     | turquoise      | 1.2499888 |
| ENSMUSG00000028759 | Hp1bp3   | 15441     | pink           | 1.2499337 |

|                    |           |        |               |           |
|--------------------|-----------|--------|---------------|-----------|
| ENSMUSG00000034152 | Exoc3     | 211446 | grey60        | 1.2452658 |
| ENSMUSG00000021279 | Cdc42bpb  | 217866 | grey60        | 1.2443778 |
| ENSMUSG00000054312 | Mrps21    | 66292  | royalblue     | 1.2424347 |
| ENSMUSG00000018322 | Tomm34    | 67145  | saddlebrown   | 1.2423418 |
| ENSMUSG00000034108 | Ccs       | 12460  | sienna3       | 1.2420359 |
| ENSMUSG00000025034 | Trim8     | 93679  | white         | 1.2417625 |
| ENSMUSG00000079426 | Arpc4     | 68089  | darkturquoise | 1.2413513 |
| ENSMUSG00000021606 | Ndufs6    | 407785 | pink          | 1.2412829 |
| ENSMUSG00000000326 | Comt      | 12846  | orange        | 1.2401801 |
| ENSMUSG00000028702 | Rad54l    | 19366  | black         | 1.2398105 |
| ENSMUSG00000030428 | Ttyh1     | 57776  | pink          | 1.239585  |
| ENSMUSG00000071650 | Ganab     | 14376  | skyblue3      | 1.2393162 |
| ENSMUSG00000029134 | Plb1      | 665270 | brown         | 1.2389696 |
| ENSMUSG00000041329 | Atp1b2    | 11932  | pink          | 1.2383676 |
| ENSMUSG00000024754 | Tmem2     | 83921  | yellowgreen   | 1.2380556 |
| ENSMUSG00000032570 | Atp2c1    | 235574 | darkgreen     | 1.2379076 |
| ENSMUSG00000033940 | Brk1      | 101314 | pink          | 1.2364141 |
| ENSMUSG00000022443 | Myh9      | 17886  | skyblue       | 1.2334843 |
| ENSMUSG00000021840 | Mapk1ip1l | 218975 | white         | 1.233442  |
| ENSMUSG00000027434 | Nkx2-2    | 18088  | midnightblue  | 1.2317164 |
| ENSMUSG00000039477 | Tnrc18    | 231861 | salmon        | 1.2308602 |
| ENSMUSG00000021770 | Samd8     | 67630  | orange        | 1.2273812 |
| ENSMUSG00000002660 | Clpp      | 53895  | white         | 1.2266688 |
| ENSMUSG00000055681 | NA        | NA     | purple        | 1.2257826 |
| ENSMUSG00000025362 | Rps26     | 27370  | turquoise     | 1.2234929 |
| ENSMUSG00000030697 | Ppp4c     | 56420  | sienna3       | 1.2232783 |



**Table S5** Primers used in real-time RT-PCR

| Gene                            | Forward                        | Reverse                      |
|---------------------------------|--------------------------------|------------------------------|
| <i><math>\beta</math>-actin</i> | 5' -GGCCCAGAGCAAGAGAGGTATCC-3' | 5' -ACGCACGATTTCCCTCTCAGC-3' |
| <i>Gfap</i>                     | 5' -GCCACCAGTAACATGCAAGA-3'    | 5' -CGGCGATAGTCGTTAGCTTC-3'  |
| <i>Sox2</i>                     | 5' -GGCGGCAACCAGAAGAACAG-3'    | 5' -GCTTGGCCTGCGTCGATGAAC-3' |
